# Supplementary material
Source: PubMed Central journal article supplement (PMC3805328)
Supplement: pr400219s_si_001.pdf [file pr400219s_si_001.pdf]

**Table S1. Summary of MRM transitions of 25 mitochondrial proteins.  
MT3 and MT7 correspond to light and heavy mTRAQ channels**

| No. | Protein     | Peptide               | Precursor Ion (Da) | Product Ion (Da) | Dwell Time (ms) | Collision Energy |
|-----|-------------|-----------------------|--------------------|------------------|-----------------|------------------|
| 1   | IPI00134961 | [MT3]-GIAFEDVR        | 523.79             | 736.36           | 20              | 39.55            |
| 2   | IPI00134961 | [MT3]-GIAFEDVR        | 523.79             | 518.26           | 20              | 39.55            |
| 3   | IPI00134961 | [MT3]-GIAFEDVR        | 523.79             | 665.33           | 20              | 39.55            |
| 4   | IPI00134961 | [MT3]-GIAFEDVR        | 523.79             | 849.45           | 20              | 39.55            |
| 5   | IPI00134961 | [MT3]-IYQIYEGTAQIQR   | 861.96             | 1065.53          | 20              | 54.43            |
| 6   | IPI00134961 | [MT3]-IYQIYEGTAQIQR   | 861.96             | 1178.62          | 20              | 54.43            |
| 7   | IPI00134961 | [MT3]-SGEYPFPLIK[MT3] | 715.91             | 854.55           | 20              | 48.00            |
| 8   | IPI00134961 | [MT3]-SGEYPFPLIK[MT3] | 715.91             | 1017.61          | 20              | 48.00            |
| 9   | IPI00134961 | [MT7]-GIAFEDVR        | 525.79             | 736.36           | 20              | 39.55            |
| 10  | IPI00134961 | [MT7]-GIAFEDVR        | 525.79             | 518.26           | 20              | 39.55            |
| 11  | IPI00134961 | [MT7]-GIAFEDVR        | 525.79             | 665.33           | 20              | 39.55            |
| 12  | IPI00134961 | [MT7]-GIAFEDVR        | 525.79             | 849.45           | 20              | 39.55            |
| 13  | IPI00134961 | [MT7]-IYQIYEGTAQIQR   | 863.97             | 1065.53          | 20              | 54.43            |
| 14  | IPI00134961 | [MT7]-IYQIYEGTAQIQR   | 863.97             | 1178.62          | 20              | 54.43            |
| 15  | IPI00134961 | [MT7]-SGEYPFPLIK[MT7] | 719.91             | 858.56           | 20              | 48.00            |
| 16  | IPI00134961 | [MT7]-SGEYPFPLIK[MT7] | 719.91             | 1021.62          | 20              | 48.18            |
| 17  | IPI00331251 | [MT3]-ELVPIAAQLDR     | 682.90             | 883.50           | 20              | 46.55            |
| 18  | IPI00331251 | [MT3]-ELVPIAAQLDR     | 682.90             | 673.36           | 20              | 46.55            |
| 19  | IPI00331251 | [MT3]-ELVPIAAQLDR     | 682.90             | 982.57           | 20              | 46.55            |
| 20  | IPI00331251 | [MT3]-NAFGAPLTK[MT3]  | 599.85             | 726.45           | 20              | 42.89            |
| 21  | IPI00331251 | [MT3]-NAFGAPLTK[MT3]  | 599.85             | 873.52           | 20              | 42.89            |
| 22  | IPI00331251 | [MT3]-LQNIQFK[MT3]    | 585.85             | 675.42           | 20              | 42.28            |
| 23  | IPI00331251 | [MT3]-LQNIQFK[MT3]    | 585.85             | 789.46           | 20              | 42.28            |
| 24  | IPI00331251 | [MT7]-ELVPIAAQLDR     | 684.90             | 883.50           | 20              | 46.55            |
| 25  | IPI00331251 | [MT7]-ELVPIAAQLDR     | 684.90             | 673.36           | 20              | 46.55            |
| 26  | IPI00331251 | [MT7]-ELVPIAAQLDR     | 684.90             | 982.57           | 20              | 46.64            |
| 27  | IPI00331251 | [MT7]-NAFGAPLTK[MT7]  | 603.86             | 730.46           | 20              | 42.89            |
| 28  | IPI00331251 | [MT7]-NAFGAPLTK[MT7]  | 603.86             | 877.53           | 20              | 42.89            |
| 29  | IPI00331251 | [MT7]-LQNIQFK[MT7]    | 589.86             | 679.43           | 20              | 42.28            |
| 30  | IPI00331251 | [MT7]-LQNIQFK[MT7]    | 589.86             | 793.47           | 20              | 42.28            |
| 31  | IPI00119203 | [MT3]-ELVGPVAR        | 490.80             | 442.28           | 20              | 38.10            |
| 32  | IPI00119203 | [MT3]-ELVGPVAR        | 490.80             | 499.30           | 20              | 38.10            |
| 33  | IPI00119203 | [MT3]-ELVGPVAR        | 490.80             | 598.37           | 20              | 38.10            |
| 34  | IPI00119203 | [MT3]-ELVGPVAR        | 490.80             | 711.45           | 20              | 38.10            |
| 35  | IPI00119203 | [MT3]-ITAFVVER        | 537.82             | 649.37           | 20              | 40.16            |
| 36  | IPI00119203 | [MT3]-ITAFVVER        | 537.82             | 720.40           | 20              | 40.16            |
| 37  | IPI00119203 | [MT3]-ITAFVVER        | 537.82             | 821.45           | 20              | 40.16            |
| 38  | IPI00119203 | [MT7]-ELVGPVAR        | 492.80             | 442.28           | 20              | 38.10            |
| 39  | IPI00119203 | [MT7]-ELVGPVAR        | 492.80             | 499.30           | 20              | 38.10            |
| 40  | IPI00119203 | [MT7]-ELVGPVAR        | 492.80             | 598.37           | 20              | 38.10            |
| 41  | IPI00119203 | [MT7]-ELVGPVAR        | 492.80             | 711.45           | 20              | 38.10            |
| 42  | IPI00119203 | [MT7]-ITAFVVER        | 539.82             | 649.37           | 20              | 40.16            |
| 43  | IPI00119203 | [MT7]-ITAFVVER        | 539.82             | 720.40           | 20              | 40.16            |
| 44  | IPI00119203 | [MT7]-ITAFVVER        | 539.82             | 821.45           | 20              | 40.16            |
| 45  | IPI00119203 | [MT3]-VAVNILNNGR      | 605.36             | 573.31           | 20              | 43.14            |
| 46  | IPI00119203 | [MT3]-VAVNILNNGR      | 605.36             | 686.39           | 20              | 43.14            |
| 47  | IPI00119203 | [MT3]-VAVNILNNGR      | 605.36             | 899.51           | 20              | 43.14            |
| 48  | IPI00119203 | [MT7]-VAVNILNNGR      | 607.36             | 573.31           | 20              | 43.14            |
| 49  | IPI00119203 | [MT7]-VAVNILNNGR      | 607.36             | 686.39           | 20              | 43.14            |
| 50  | IPI00119203 | [MT7]-VAVNILNNGR      | 607.36             | 899.51           | 20              | 43.14            |
| 51  | IPI00776047 | [MT3]-AIASATEGGSVQIR  | 798.94             | 756.44           | 20              | 51.65            |
| 52  | IPI00776047 | [MT3]-AIASATEGGSVQIR  | 798.94             | 813.46           | 20              | 51.65            |

|     |             |                         |        |         |    |       |
|-----|-------------|-------------------------|--------|---------|----|-------|
| 53  | IPI00776047 | [MT3]-AIASATEGGSVQIR    | 798.94 | 942.50  | 20 | 51.65 |
| 54  | IPI00776047 | [MT3]-AIASATEGGSVQIR    | 798.94 | 513.31  | 20 | 51.65 |
| 55  | IPI00776047 | [MT3]-AIASATEGGSVQIR    | 798.94 | 1043.55 | 20 | 51.65 |
| 56  | IPI00776047 | [MT3]-ATAQDNPK[MT3]     | 562.81 | 613.33  | 20 | 41.26 |
| 57  | IPI00776047 | [MT3]-ATAQDNPK[MT3]     | 562.81 | 812.43  | 20 | 41.26 |
| 58  | IPI00776047 | [MT3]-ELWFSDDPNVTK[MT3] | 865.94 | 1015.51 | 20 | 54.60 |
| 59  | IPI00776047 | [MT3]-ELWFSDDPNVTK[MT3] | 865.94 | 1162.57 | 20 | 54.60 |
| 60  | IPI00776047 | [MT3]-ELWFSDDPNVTK[MT3] | 865.94 | 698.42  | 20 | 54.60 |
| 61  | IPI00776047 | [MT3]-GVIFYLR           | 504.31 | 598.33  | 20 | 38.69 |
| 62  | IPI00776047 | [MT3]-GVIFYLR           | 504.31 | 711.42  | 20 | 38.69 |
| 63  | IPI00776047 | [MT3]-GVIFYLR           | 336.54 | 451.27  | 20 | 27.26 |
| 64  | IPI00776047 | [MT3]-LFNIHED           | 514.26 | 627.27  | 20 | 39.13 |
| 65  | IPI00776047 | [MT3]-LFNIHED           | 343.18 | 400.15  | 20 | 27.45 |
| 66  | IPI00776047 | [MT3]-LNDGSQITFEK[MT3]  | 766.41 | 1049.56 | 20 | 50.22 |
| 67  | IPI00776047 | [MT3]-LNDGSQITFEK[MT3]  | 511.28 | 664.37  | 20 | 32.33 |
| 68  | IPI00776047 | [MT3]-TGGLEIDSDFGGFR    | 805.89 | 785.36  | 20 | 51.96 |
| 69  | IPI00776047 | [MT3]-TGGLEIDSDFGGFR    | 805.89 | 900.38  | 20 | 51.96 |
| 70  | IPI00776047 | [MT3]-TGGLEIDSDFGGFR    | 805.89 | 1013.47 | 20 | 51.96 |
| 71  | IPI00776047 | [MT3]-TGGLEIDSDFGGFR    | 805.89 | 1142.51 | 20 | 51.96 |
| 72  | IPI00776047 | [MT7]-AIASATEGGSVQIR    | 800.94 | 756.44  | 20 | 51.65 |
| 73  | IPI00776047 | [MT7]-AIASATEGGSVQIR    | 800.94 | 813.46  | 20 | 51.65 |
| 74  | IPI00776047 | [MT7]-AIASATEGGSVQIR    | 800.94 | 942.50  | 20 | 51.65 |
| 75  | IPI00776047 | [MT7]-AIASATEGGSVQIR    | 800.94 | 513.31  | 20 | 51.65 |
| 76  | IPI00776047 | [MT7]-AIASATEGGSVQIR    | 800.94 | 1043.55 | 20 | 51.65 |
| 77  | IPI00776047 | [MT7]-ATAQDNPK[MT7]     | 566.81 | 617.34  | 20 | 41.26 |
| 78  | IPI00776047 | [MT7]-ATAQDNPK[MT7]     | 566.81 | 816.43  | 20 | 41.26 |
| 79  | IPI00776047 | [MT7]-ELWFSDDPNVTK[MT7] | 869.95 | 1019.51 | 20 | 54.60 |
| 80  | IPI00776047 | [MT7]-ELWFSDDPNVTK[MT7] | 869.95 | 1166.58 | 20 | 54.60 |
| 81  | IPI00776047 | [MT7]-ELWFSDDPNVTK[MT7] | 869.95 | 702.43  | 20 | 54.60 |
| 82  | IPI00776047 | [MT7]-GVIFYLR           | 506.31 | 598.33  | 20 | 38.69 |
| 83  | IPI00776047 | [MT7]-GVIFYLR           | 506.31 | 711.42  | 20 | 38.69 |
| 84  | IPI00776047 | [MT7]-GVIFYLR           | 337.88 | 451.27  | 20 | 27.26 |
| 85  | IPI00776047 | [MT7]-LFNIHED           | 516.27 | 627.27  | 20 | 39.13 |
| 86  | IPI00776047 | [MT7]-LFNIHED           | 344.51 | 400.15  | 20 | 27.45 |
| 87  | IPI00776047 | [MT7]-LNDGSQITFEK[MT7]  | 770.42 | 1053.57 | 20 | 50.22 |
| 88  | IPI00776047 | [MT7]-LNDGSQITFEK[MT7]  | 513.95 | 668.37  | 20 | 32.33 |
| 89  | IPI00776047 | [MT7]-TGGLEIDSDFGGFR    | 807.90 | 785.36  | 20 | 51.96 |
| 90  | IPI00776047 | [MT7]-TGGLEIDSDFGGFR    | 807.90 | 900.38  | 20 | 51.96 |
| 91  | IPI00776047 | [MT7]-TGGLEIDSDFGGFR    | 807.90 | 1013.47 | 20 | 51.96 |
| 92  | IPI00776047 | [MT7]-TGGLEIDSDFGGFR    | 807.90 | 1142.51 | 20 | 51.96 |
| 93  | IPI00648318 | [MT3]-AVLLGPPGAGK[MT3]  | 630.40 | 666.39  | 20 | 44.24 |
| 94  | IPI00648318 | [MT3]-AVLLGPPGAGK[MT3]  | 630.40 | 723.41  | 20 | 44.24 |
| 95  | IPI00648318 | [MT3]-AVLLGPPGAGK[MT3]  | 630.40 | 836.50  | 20 | 44.24 |
| 96  | IPI00648318 | [MT3]-NGFLLDGFPR        | 638.35 | 591.29  | 20 | 44.59 |
| 97  | IPI00648318 | [MT3]-NGFLLDGFPR        | 638.35 | 704.37  | 20 | 44.59 |
| 98  | IPI00648318 | [MT3]-LEAYHTQTTPLVEYYR  | 708.70 | 729.36  | 20 | 38.05 |
| 99  | IPI00648318 | [MT3]-LEAYHTQTTPLVEYYR  | 708.70 | 842.44  | 20 | 38.05 |
| 100 | IPI00648318 | [MT3]-LEAYHTQTTPLVEYYR  | 708.70 | 939.49  | 20 | 38.05 |
| 101 | IPI00648318 | [MT7]-AVLLGPPGAGK[MT7]  | 634.40 | 670.40  | 20 | 44.24 |
| 102 | IPI00648318 | [MT7]-AVLLGPPGAGK[MT7]  | 634.40 | 727.42  | 20 | 44.24 |
| 103 | IPI00648318 | [MT7]-AVLLGPPGAGK[MT7]  | 634.40 | 840.51  | 20 | 44.24 |
| 104 | IPI00648318 | [MT7]-NGFLLDGFPR        | 640.35 | 591.29  | 20 | 44.59 |
| 105 | IPI00648318 | [MT7]-NGFLLDGFPR        | 640.35 | 704.37  | 20 | 44.59 |
| 106 | IPI00648318 | [MT7]-LEAYHTQTTPLVEYYR  | 710.03 | 729.36  | 20 | 38.05 |
| 107 | IPI00648318 | [MT7]-LEAYHTQTTPLVEYYR  | 710.03 | 842.44  | 20 | 38.05 |
| 108 | IPI00648318 | [MT7]-LEAYHTQTTPLVEYYR  | 710.03 | 939.49  | 20 | 38.05 |

|     |             |                          |        |         |    |       |
|-----|-------------|--------------------------|--------|---------|----|-------|
| 109 | IPI00134746 | [MT3]-EFVEEFIWPAVQSSALYB | 852.42 | 1238.60 | 20 | 42.22 |
| 110 | IPI00134746 | [MT3]-EFVEEFIWPAVQSSALYB | 852.42 | 1335.65 | 20 | 42.22 |
| 111 | IPI00134746 | [MT3]-EFVEEFIWPAVQSSALYB | 852.42 | 1521.73 | 20 | 42.22 |
| 112 | IPI00134746 | [MT3]-EQGYDVIAYLANIGQK[M | 688.04 | 1117.64 | 20 | 37.45 |
| 113 | IPI00134746 | [MT3]-EQGYDVIAYLANIGQK[M | 688.04 | 1230.72 | 20 | 37.45 |
| 114 | IPI00134746 | [MT3]-GQVYILGR           | 523.31 | 621.37  | 20 | 39.53 |
| 115 | IPI00134746 | [MT3]-GQVYILGR           | 523.31 | 720.44  | 20 | 39.53 |
| 116 | IPI00134746 | [MT3]-NQAPPGLYTK[MT3]    | 684.89 | 818.48  | 20 | 46.64 |
| 117 | IPI00134746 | [MT3]-NQAPPGLYTK[MT3]    | 684.89 | 915.53  | 20 | 46.64 |
| 118 | IPI00134746 | [MT7]-EFVEEFIWPAVQSSALYB | 853.76 | 1238.60 | 20 | 42.22 |
| 119 | IPI00134746 | [MT7]-EFVEEFIWPAVQSSALYB | 853.76 | 1335.65 | 20 | 42.22 |
| 120 | IPI00134746 | [MT7]-EFVEEFIWPAVQSSALYB | 853.76 | 1521.73 | 20 | 42.22 |
| 121 | IPI00134746 | [MT7]-EQGYDVIAYLANIGQK[M | 690.71 | 1121.64 | 20 | 37.45 |
| 122 | IPI00134746 | [MT7]-EQGYDVIAYLANIGQK[M | 690.71 | 1234.73 | 20 | 37.45 |
| 123 | IPI00134746 | [MT7]-GQVYILGR           | 525.31 | 621.37  | 20 | 39.53 |
| 124 | IPI00134746 | [MT7]-GQVYILGR           | 525.31 | 720.44  | 20 | 39.53 |
| 125 | IPI00134746 | [MT7]-NQAPPGLYTK[MT7]    | 688.89 | 822.48  | 20 | 46.64 |
| 126 | IPI00134746 | [MT7]-NQAPPGLYTK[MT7]    | 688.89 | 919.54  | 20 | 46.64 |
| 127 | IPI00856424 | [MT3]-ELDPVQK[MT3]       | 554.82 | 611.39  | 20 | 40.91 |
| 128 | IPI00856424 | [MT3]-ELDPVQK[MT3]       | 554.82 | 726.41  | 20 | 40.91 |
| 129 | IPI00856424 | [MT3]-ELDPVQK[MT3]       | 554.82 | 839.50  | 20 | 40.91 |
| 130 | IPI00856424 | [MT3]-ELDPVQK[MT3]       | 370.22 | 514.33  | 20 | 28.24 |
| 131 | IPI00856424 | [MT3]-NIGVTAVAFNK[MT3]   | 707.41 | 789.46  | 20 | 47.63 |
| 132 | IPI00856424 | [MT3]-NIGVTAVAFNK[MT3]   | 471.95 | 548.32  | 20 | 31.19 |
| 133 | IPI00856424 | [MT3]-QASGGPVDIGPEYQQDL  | 729.02 | 774.37  | 20 | 38.64 |
| 134 | IPI00856424 | [MT3]-QASGGPVDIGPEYQQDL  | 729.02 | 937.44  | 20 | 38.64 |
| 135 | IPI00856424 | [MT3]-QASGGPVDIGPEYQQDL  | 729.02 | 1066.48 | 20 | 38.64 |
| 136 | IPI00856424 | [MT3]-SAVSVHLK[MT3]      | 560.85 | 723.45  | 20 | 41.18 |
| 137 | IPI00856424 | [MT3]-SAVSVHLK[MT3]      | 560.85 | 822.52  | 20 | 41.18 |
| 138 | IPI00856424 | [MT7]-ELDPVQK[MT7]       | 558.83 | 615.39  | 20 | 40.91 |
| 139 | IPI00856424 | [MT7]-ELDPVQK[MT7]       | 558.83 | 730.42  | 20 | 40.91 |
| 140 | IPI00856424 | [MT7]-ELDPVQK[MT7]       | 558.83 | 843.51  | 20 | 40.91 |
| 141 | IPI00856424 | [MT7]-ELDPVQK[MT7]       | 372.89 | 518.34  | 20 | 28.24 |
| 142 | IPI00856424 | [MT7]-NIGVTAVAFNK[MT7]   | 711.42 | 793.47  | 20 | 47.63 |
| 143 | IPI00856424 | [MT7]-NIGVTAVAFNK[MT7]   | 474.62 | 552.33  | 20 | 31.19 |
| 144 | IPI00856424 | [MT7]-QASGGPVDIGPEYQQDL  | 730.36 | 774.37  | 20 | 38.64 |
| 145 | IPI00856424 | [MT7]-QASGGPVDIGPEYQQDL  | 730.36 | 937.44  | 20 | 38.64 |
| 146 | IPI00856424 | [MT7]-QASGGPVDIGPEYQQDL  | 730.36 | 1066.48 | 20 | 38.64 |
| 147 | IPI00856424 | [MT7]-SAVSVHLK[MT7]      | 564.85 | 727.46  | 20 | 41.18 |
| 148 | IPI00856424 | [MT7]-SAVSVHLK[MT7]      | 564.85 | 826.53  | 20 | 41.18 |
| 149 | IPI00114209 | [MT3]-DDGSWEVIEGYR       | 783.37 | 736.40  | 20 | 50.97 |
| 150 | IPI00114209 | [MT3]-DDGSWEVIEGYR       | 783.37 | 865.44  | 20 | 50.97 |
| 151 | IPI00114209 | [MT3]-IIAEGANGPTTPEADK[M | 932.49 | 1169.58 | 20 | 57.53 |
| 152 | IPI00114209 | [MT3]-TAAYVNAIEK[MT3]    | 680.39 | 813.48  | 20 | 46.44 |
| 153 | IPI00114209 | [MT3]-TAAYVNAIEK[MT3]    | 680.39 | 976.55  | 20 | 46.44 |
| 154 | IPI00114209 | [MT3]-TAAYVNAIEK[MT3]    | 680.39 | 1047.58 | 20 | 46.44 |
| 155 | IPI00114209 | [MT3]-YSTDVSVDDEVK[MT3]  | 761.39 | 816.45  | 20 | 50.00 |
| 156 | IPI00114209 | [MT3]-YSTDVSVDDEVK[MT3]  | 761.39 | 915.51  | 20 | 50.00 |
| 157 | IPI00114209 | [MT7]-DDGSWEVIEGYR       | 785.37 | 736.40  | 20 | 50.97 |
| 158 | IPI00114209 | [MT7]-DDGSWEVIEGYR       | 785.37 | 865.44  | 20 | 50.97 |
| 159 | IPI00114209 | [MT7]-IIAEGANGPTTPEADK[M | 936.50 | 1173.59 | 20 | 57.53 |
| 160 | IPI00114209 | [MT7]-TAAYVNAIEK[MT7]    | 684.39 | 817.49  | 20 | 46.44 |
| 161 | IPI00114209 | [MT7]-TAAYVNAIEK[MT7]    | 684.39 | 980.55  | 20 | 46.44 |
| 162 | IPI00114209 | [MT7]-TAAYVNAIEK[MT7]    | 684.39 | 1051.59 | 20 | 46.44 |
| 163 | IPI00114209 | [MT7]-YSTDVSVDDEVK[MT7]  | 765.40 | 820.45  | 20 | 50.00 |
| 164 | IPI00114209 | [MT7]-YSTDVSVDDEVK[MT7]  | 765.40 | 919.52  | 20 | 50.00 |

|     |             |                          |        |         |    |       |
|-----|-------------|--------------------------|--------|---------|----|-------|
| 165 | IPI00117312 | [MT3]-ASAELALGENNEVLK[MT | 919.50 | 1042.55 | 20 | 56.96 |
| 166 | IPI00117312 | [MT3]-ASAELALGENNEVLK[MT | 919.50 | 1155.64 | 20 | 56.96 |
| 167 | IPI00117312 | [MT3]-FVTVQTISGTGALR     | 795.45 | 774.45  | 20 | 51.50 |
| 168 | IPI00117312 | [MT3]-FVTVQTISGTGALR     | 795.45 | 875.49  | 20 | 51.50 |
| 169 | IPI00117312 | [MT3]-FVTVQTISGTGALR     | 795.45 | 1003.55 | 20 | 51.50 |
| 170 | IPI00117312 | [MT3]-IAATILTSPDLR       | 705.92 | 688.36  | 20 | 47.56 |
| 171 | IPI00117312 | [MT3]-IAATILTSPDLR       | 705.92 | 801.45  | 20 | 47.56 |
| 172 | IPI00117312 | [MT3]-IAATILTSPDLR       | 705.92 | 914.53  | 20 | 47.56 |
| 173 | IPI00117312 | [MT7]-ASAELALGENNEVLK[MT | 923.51 | 1046.56 | 20 | 56.96 |
| 174 | IPI00117312 | [MT7]-ASAELALGENNEVLK[MT | 923.51 | 1159.64 | 20 | 56.96 |
| 175 | IPI00117312 | [MT7]-FVTVQTISGTGALR     | 797.46 | 774.45  | 20 | 51.50 |
| 176 | IPI00117312 | [MT7]-FVTVQTISGTGALR     | 797.46 | 875.49  | 20 | 51.50 |
| 177 | IPI00117312 | [MT7]-FVTVQTISGTGALR     | 797.46 | 1003.55 | 20 | 51.50 |
| 178 | IPI00117312 | [MT7]-IAATILTSPDLR       | 707.92 | 688.36  | 20 | 47.56 |
| 179 | IPI00117312 | [MT7]-IAATILTSPDLR       | 707.92 | 801.45  | 20 | 47.56 |
| 180 | IPI00117312 | [MT7]-IAATILTSPDLR       | 707.92 | 914.53  | 20 | 47.56 |
| 181 | IPI00115607 | [MT3]-DFIYVSQDPK[MT3]    | 746.40 | 813.45  | 20 | 49.34 |
| 182 | IPI00115607 | [MT3]-DFIYVSQDPK[MT3]    | 746.40 | 976.51  | 20 | 49.34 |
| 183 | IPI00115607 | [MT3]-DFIYVSQDPK[MT3]    | 746.40 | 1089.59 | 20 | 49.34 |
| 184 | IPI00115607 | [MT3]-LAAAFVSR           | 523.31 | 579.32  | 20 | 39.53 |
| 185 | IPI00115607 | [MT3]-LAAAFVSR           | 523.31 | 650.36  | 20 | 39.53 |
| 186 | IPI00115607 | [MT3]-LAAAFVSR           | 523.31 | 721.40  | 20 | 39.53 |
| 187 | IPI00115607 | [MT3]-VGSPPLEK[MT3]      | 553.83 | 626.39  | 20 | 40.87 |
| 188 | IPI00115607 | [MT3]-VGSPPLEK[MT3]      | 553.83 | 723.44  | 20 | 40.87 |
| 189 | IPI00115607 | [MT3]-VGSPPLEK[MT3]      | 553.83 | 810.47  | 20 | 40.87 |
| 190 | IPI00115607 | [MT7]-DFIYVSQDPK[MT7]    | 750.40 | 817.45  | 20 | 49.34 |
| 191 | IPI00115607 | [MT7]-DFIYVSQDPK[MT7]    | 750.40 | 980.52  | 20 | 49.34 |
| 192 | IPI00115607 | [MT7]-DFIYVSQDPK[MT7]    | 500.60 | 1093.60 | 20 | 31.94 |
| 193 | IPI00115607 | [MT7]-DFIYVSQDPK[MT7]    | 525.31 | 579.32  | 20 | 39.53 |
| 194 | IPI00115607 | [MT7]-LAAAFVSR           | 750.40 | 1093.60 | 20 | 49.34 |
| 195 | IPI00115607 | [MT7]-LAAAFVSR           | 525.31 | 650.36  | 20 | 39.53 |
| 196 | IPI00115607 | [MT7]-LAAAFVSR           | 525.31 | 721.40  | 20 | 39.53 |
| 197 | IPI00115607 | [MT7]-VGSPPLEK[MT7]      | 557.84 | 630.39  | 20 | 40.87 |
| 198 | IPI00115607 | [MT7]-VGSPPLEK[MT7]      | 557.84 | 727.45  | 20 | 40.87 |
| 199 | IPI00115607 | [MT7]-VGSPPLEK[MT7]      | 557.84 | 814.48  | 20 | 40.87 |
| 200 | IPI00454049 | [MT3]-AFAAGADIK[MT3]     | 572.33 | 643.38  | 20 | 41.68 |
| 201 | IPI00454049 | [MT3]-AFAAGADIK[MT3]     | 572.33 | 714.41  | 20 | 41.68 |
| 202 | IPI00454049 | [MT3]-AFAAGADIK[MT3]     | 572.33 | 785.45  | 20 | 41.68 |
| 203 | IPI00454049 | [MT3]-AFAAGADIK[MT3]     | 381.89 | 515.32  | 20 | 28.58 |
| 204 | IPI00454049 | [MT3]-AQFGQPEILLGTIPGAGG | 751.08 | 743.38  | 20 | 39.28 |
| 205 | IPI00454049 | [MT3]-AQFGQPEILLGTIPGAGG | 751.08 | 1127.62 | 20 | 39.28 |
| 206 | IPI00454049 | [MT3]-AQFGQPEILLGTIPGAGG | 751.08 | 1240.70 | 20 | 39.28 |
| 207 | IPI00454049 | [MT3]-AQFGQPEILLGTIPGAGG | 751.08 | 1353.78 | 20 | 39.28 |
| 208 | IPI00454049 | [MT3]-FLSHWDHITR         | 484.59 | 526.31  | 20 | 31.55 |
| 209 | IPI00454049 | [MT3]-FLSHWDHITR         | 484.59 | 641.34  | 20 | 31.55 |
| 210 | IPI00454049 | [MT3]-FLSHWDHITR         | 484.59 | 827.42  | 20 | 31.55 |
| 211 | IPI00454049 | [MT3]-FLSHWDHITR         | 484.59 | 964.47  | 20 | 31.55 |
| 212 | IPI00454049 | [MT3]-NSSVGLIQLNRPK[MT3] | 853.51 | 895.55  | 20 | 54.05 |
| 213 | IPI00454049 | [MT3]-NSSVGLIQLNRPK[MT3] | 853.51 | 1008.63 | 20 | 54.05 |
| 214 | IPI00454049 | [MT3]-NSSVGLIQLNRPK[MT3] | 853.51 | 1121.72 | 20 | 54.05 |
| 215 | IPI00454049 | [MT3]-NSSVGLIQLNRPK[MT3] | 569.34 | 654.40  | 20 | 34.01 |
| 216 | IPI00454049 | [MT3]-NSSVGLIQLNRPK[MT3] | 569.34 | 895.55  | 20 | 34.01 |
| 217 | IPI00454049 | [MT3]-NSSVGLIQLNRPK[MT3] | 569.34 | 767.49  | 20 | 34.01 |
| 218 | IPI00454049 | [MT7]-AFAAGADIK[MT7]     | 576.34 | 647.38  | 20 | 41.68 |
| 219 | IPI00454049 | [MT7]-AFAAGADIK[MT7]     | 576.34 | 718.42  | 20 | 41.68 |
| 220 | IPI00454049 | [MT7]-AFAAGADIK[MT7]     | 576.34 | 789.46  | 20 | 41.68 |

|     |             |                          |         |         |    |       |
|-----|-------------|--------------------------|---------|---------|----|-------|
| 221 | IPI00454049 | [MT7]-AFAAGADIK[MT7]     | 576.34  | 519.33  | 20 | 41.68 |
| 222 | IPI00454049 | [MT7]-AFAAGADIK[MT7]     | 384.56  | 505.29  | 20 | 28.58 |
| 223 | IPI00454049 | [MT7]-AFAAGADIK[MT7]     | 384.56  | 519.33  | 20 | 28.58 |
| 224 | IPI00454049 | [MT7]-AQFGQPEILLGTIPGAGG | 752.41  | 743.38  | 20 | 39.28 |
| 225 | IPI00454049 | [MT7]-AQFGQPEILLGTIPGAGG | 752.41  | 1127.62 | 20 | 39.28 |
| 226 | IPI00454049 | [MT7]-AQFGQPEILLGTIPGAGG | 752.41  | 1240.70 | 20 | 39.28 |
| 227 | IPI00454049 | [MT7]-AQFGQPEILLGTIPGAGG | 752.41  | 1353.78 | 20 | 39.28 |
| 228 | IPI00454049 | [MT7]-FLSHWDHITR         | 728.38  | 526.31  | 20 | 48.46 |
| 229 | IPI00454049 | [MT7]-FLSHWDHITR         | 728.38  | 641.34  | 20 | 48.46 |
| 230 | IPI00454049 | [MT7]-FLSHWDHITR         | 728.38  | 827.42  | 20 | 48.46 |
| 231 | IPI00454049 | [MT7]-FLSHWDHITR         | 485.93  | 526.31  | 20 | 31.55 |
| 232 | IPI00454049 | [MT7]-FLSHWDHITR         | 485.93  | 641.34  | 20 | 31.55 |
| 233 | IPI00454049 | [MT7]-FLSHWDHITR         | 485.93  | 827.42  | 20 | 31.55 |
| 234 | IPI00454049 | [MT7]-FLSHWDHITR         | 485.93  | 964.47  | 20 | 31.55 |
| 235 | IPI00454049 | [MT7]-NSSVGLIQLNRPK[MT7] | 857.51  | 899.55  | 20 | 54.05 |
| 236 | IPI00454049 | [MT7]-NSSVGLIQLNRPK[MT7] | 857.51  | 1012.64 | 20 | 54.05 |
| 237 | IPI00454049 | [MT7]-NSSVGLIQLNRPK[MT7] | 857.51  | 1125.72 | 20 | 54.05 |
| 238 | IPI00454049 | [MT7]-NSSVGLIQLNRPK[MT7] | 572.01  | 658.41  | 20 | 34.01 |
| 239 | IPI00454049 | [MT7]-NSSVGLIQLNRPK[MT7] | 857.51  | 771.50  | 20 | 54.05 |
| 240 | IPI00454049 | [MT7]-NSSVGLIQLNRPK[MT7] | 572.01  | 899.55  | 20 | 34.01 |
| 241 | IPI00454049 | [MT7]-NSSVGLIQLNRPK[MT7] | 572.01  | 771.50  | 20 | 34.01 |
| 242 | IPI00226140 | [MT3]-ELGLETYK[MT3]      | 616.85  | 680.36  | 20 | 43.64 |
| 243 | IPI00226140 | [MT3]-ELGLETYK[MT3]      | 616.85  | 793.45  | 20 | 43.64 |
| 244 | IPI00226140 | [MT3]-ELGLETYK[MT3]      | 616.85  | 850.47  | 20 | 43.64 |
| 245 | IPI00226140 | [MT3]-ELGLETYK[MT3]      | 411.57  | 551.32  | 20 | 29.44 |
| 246 | IPI00226140 | [MT3]-VLNSQEALQPVHYEEK[M | 722.05  | 845.42  | 20 | 38.44 |
| 247 | IPI00226140 | [MT3]-VLNSQEALQPVHYEEK[M | 1082.57 | 1041.54 | 20 | 64.13 |
| 248 | IPI00226140 | [MT3]-VLNSQEALQPVHYEEK[M | 1082.57 | 1282.68 | 20 | 64.13 |
| 249 | IPI00226140 | [MT3]-VPLGSVIK[MT3]      | 546.86  | 643.41  | 20 | 40.56 |
| 250 | IPI00226140 | [MT3]-VPLGSVIK[MT3]      | 546.86  | 756.50  | 20 | 40.56 |
| 251 | IPI00226140 | [MT3]-VPLGSVIK[MT3]      | 364.91  | 499.36  | 20 | 28.08 |
| 252 | IPI00226140 | [MT3]-YVDLGGSYVGPTQNR    | 883.45  | 934.47  | 20 | 55.37 |
| 253 | IPI00226140 | [MT3]-YVDLGGSYVGPTQNR    | 883.45  | 1021.51 | 20 | 55.37 |
| 254 | IPI00226140 | [MT3]-YVDLGGSYVGPTQNR    | 883.45  | 1078.53 | 20 | 55.37 |
| 255 | IPI00226140 | [MT3]-YVDLGGSYVGPTQNR    | 589.30  | 615.32  | 20 | 34.59 |
| 256 | IPI00226140 | [MT3]-YVDLGGSYVGPTQNR    | 883.45  | 672.34  | 20 | 55.37 |
| 257 | IPI00226140 | [MT7]-ELGLETYK[MT7]      | 620.85  | 684.37  | 20 | 43.64 |
| 258 | IPI00226140 | [MT7]-ELGLETYK[MT7]      | 620.85  | 797.45  | 20 | 43.64 |
| 259 | IPI00226140 | [MT7]-ELGLETYK[MT7]      | 620.85  | 854.47  | 20 | 43.64 |
| 260 | IPI00226140 | [MT7]-ELGLETYK[MT7]      | 414.24  | 555.33  | 20 | 29.44 |
| 261 | IPI00226140 | [MT7]-VLNSQEALQPVHYEEK[M | 724.72  | 849.42  | 20 | 38.44 |
| 262 | IPI00226140 | [MT7]-VLNSQEALQPVHYEEK[M | 1086.58 | 1045.54 | 20 | 64.13 |
| 263 | IPI00226140 | [MT7]-VLNSQEALQPVHYEEK[M | 1086.58 | 1286.69 | 20 | 64.13 |
| 264 | IPI00226140 | [MT7]-VPLGSVIK[MT7]      | 550.87  | 647.42  | 20 | 40.56 |
| 265 | IPI00226140 | [MT7]-VPLGSVIK[MT7]      | 550.87  | 760.50  | 20 | 40.56 |
| 266 | IPI00226140 | [MT7]-VPLGSVIK[MT7]      | 367.58  | 503.37  | 20 | 28.08 |
| 267 | IPI00226140 | [MT7]-YVDLGGSYVGPTQNR    | 885.45  | 934.47  | 20 | 55.37 |
| 268 | IPI00226140 | [MT7]-YVDLGGSYVGPTQNR    | 885.45  | 1021.51 | 20 | 55.37 |
| 269 | IPI00226140 | [MT7]-YVDLGGSYVGPTQNR    | 885.45  | 1078.53 | 20 | 55.37 |
| 270 | IPI00226140 | [MT7]-YVDLGGSYVGPTQNR    | 590.64  | 615.32  | 20 | 34.59 |
| 271 | IPI00226140 | [MT7]-YVDLGGSYVGPTQNR    | 885.45  | 672.34  | 20 | 55.37 |
| 272 | IPI00263863 | [MT3]-VLQATVAVGSGGK[MT   | 783.47  | 814.48  | 20 | 50.97 |
| 273 | IPI00263863 | [MT3]-VLQATVAVGSGGK[MT   | 783.47  | 913.55  | 20 | 50.97 |
| 274 | IPI00263863 | [MT3]-SGEIEPVSVK[MT3]    | 662.88  | 798.47  | 20 | 45.67 |
| 275 | IPI00263863 | [MT3]-SGEIEPVSVK[MT3]    | 662.88  | 911.56  | 20 | 45.67 |
| 276 | IPI00263863 | [MT3]-SGEIEPVSVK[MT3]    | 662.88  | 669.43  | 20 | 45.67 |

|     |             |                           |        |         |    |       |
|-----|-------------|---------------------------|--------|---------|----|-------|
| 277 | IPI00263863 | [MT3]-VLLPEYGGTK[MT3]     | 678.90 | 891.46  | 20 | 46.37 |
| 278 | IPI00263863 | [MT3]-VLLPEYGGTK[MT3]     | 678.90 | 1004.54 | 20 | 46.37 |
| 279 | IPI00263863 | [MT7]-VLQATVVAVGSGGK[MT7] | 787.48 | 818.49  | 20 | 50.97 |
| 280 | IPI00263863 | [MT7]-VLQATVVAVGSGGK[MT7] | 787.48 | 917.55  | 20 | 50.97 |
| 281 | IPI00263863 | [MT7]-SGEIEPVSVK[MT7]     | 666.88 | 802.48  | 20 | 45.67 |
| 282 | IPI00263863 | [MT7]-SGEIEPVSVK[MT7]     | 666.88 | 915.56  | 20 | 45.67 |
| 283 | IPI00263863 | [MT7]-SGEIEPVSVK[MT7]     | 666.88 | 673.44  | 20 | 45.67 |
| 284 | IPI00263863 | [MT7]-VLLPEYGGTK[MT7]     | 682.90 | 895.46  | 20 | 46.37 |
| 285 | IPI00263863 | [MT7]-VLLPEYGGTK[MT7]     | 682.90 | 1008.55 | 20 | 46.55 |
| 286 | IPI00381412 | [MT3]-LSEQELEFR           | 645.84 | 821.42  | 20 | 44.92 |
| 287 | IPI00381412 | [MT3]-LSEQELEFR           | 645.84 | 950.46  | 20 | 44.92 |
| 288 | IPI00381412 | [MT3]-QHIELALEK[MT3]      | 680.90 | 600.37  | 20 | 46.46 |
| 289 | IPI00381412 | [MT3]-QHIELALEK[MT3]      | 680.90 | 713.46  | 20 | 46.46 |
| 290 | IPI00381412 | [MT3]-TFDSAVAK[MT3]       | 559.81 | 730.41  | 20 | 41.13 |
| 291 | IPI00381412 | [MT3]-TFDSAVAK[MT3]       | 559.81 | 877.48  | 20 | 41.13 |
| 292 | IPI00381412 | [MT7]-LSEQELEFR           | 647.84 | 821.42  | 20 | 44.92 |
| 293 | IPI00381412 | [MT7]-LSEQELEFR           | 647.84 | 950.46  | 20 | 44.92 |
| 294 | IPI00381412 | [MT7]-QHIELALEK[MT7]      | 684.91 | 604.38  | 20 | 46.46 |
| 295 | IPI00381412 | [MT7]-QHIELALEK[MT7]      | 684.91 | 717.46  | 20 | 46.46 |
| 296 | IPI00381412 | [MT7]-TFDSAVAK[MT7]       | 563.82 | 734.42  | 20 | 41.13 |
| 297 | IPI00381412 | [MT7]-TFDSAVAK[MT7]       | 563.82 | 881.48  | 20 | 41.13 |
| 298 | IPI00125929 | [MT3]-FYSVNVDYSK[MT3]     | 751.39 | 865.44  | 20 | 49.56 |
| 299 | IPI00125929 | [MT3]-FYSVNVDYSK[MT3]     | 751.39 | 1051.54 | 20 | 49.56 |
| 300 | IPI00125929 | [MT3]-FYSVNVDYSK[MT3]     | 751.39 | 652.33  | 20 | 49.56 |
| 301 | IPI00125929 | [MT3]-LALFNPVSWDR         | 786.91 | 874.41  | 20 | 51.12 |
| 302 | IPI00125929 | [MT3]-LALFNPVSWDR         | 786.91 | 988.45  | 20 | 51.12 |
| 303 | IPI00125929 | [MT3]-LALFNPVSWDR         | 786.91 | 563.26  | 20 | 51.12 |
| 304 | IPI00125929 | [MT3]-LGPNEQYK[MT3]       | 614.84 | 918.47  | 20 | 43.55 |
| 305 | IPI00125929 | [MT3]-LGPNEQYK[MT3]       | 614.84 | 975.49  | 20 | 43.55 |
| 306 | IPI00125929 | [MT3]-NNPEPWNK[MT3]       | 639.83 | 684.38  | 20 | 44.65 |
| 307 | IPI00125929 | [MT3]-NNPEPWNK[MT3]       | 639.83 | 813.43  | 20 | 44.65 |
| 308 | IPI00125929 | [MT3]-NNPEPWNK[MT3]       | 639.83 | 910.48  | 20 | 44.65 |
| 309 | IPI00125929 | [MT7]-FYSVNVDYSK[MT7]     | 755.39 | 869.45  | 20 | 49.56 |
| 310 | IPI00125929 | [MT7]-FYSVNVDYSK[MT7]     | 755.39 | 1055.55 | 20 | 49.56 |
| 311 | IPI00125929 | [MT7]-FYSVNVDYSK[MT7]     | 755.39 | 656.34  | 20 | 49.56 |
| 312 | IPI00125929 | [MT7]-LALFNPVSWDR         | 788.92 | 874.41  | 20 | 51.12 |
| 313 | IPI00125929 | [MT7]-LALFNPVSWDR         | 788.92 | 988.45  | 20 | 51.12 |
| 314 | IPI00125929 | [MT7]-LALFNPVSWDR         | 788.92 | 563.26  | 20 | 51.12 |
| 315 | IPI00125929 | [MT7]-LGPNEQYK[MT7]       | 618.84 | 922.48  | 20 | 43.55 |
| 316 | IPI00125929 | [MT7]-LGPNEQYK[MT7]       | 618.84 | 979.50  | 20 | 43.73 |
| 317 | IPI00125929 | [MT7]-NNPEPWNK[MT7]       | 643.84 | 688.39  | 20 | 44.65 |
| 318 | IPI00125929 | [MT7]-NNPEPWNK[MT7]       | 643.84 | 817.43  | 20 | 44.65 |
| 319 | IPI00125929 | [MT7]-NNPEPWNK[MT7]       | 643.84 | 914.49  | 20 | 44.65 |
| 320 | IPI00132042 | [MT3]-DFLIPIGK[MT3]       | 591.87 | 667.45  | 20 | 42.54 |
| 321 | IPI00132042 | [MT3]-DFLIPIGK[MT3]       | 591.87 | 780.53  | 20 | 42.54 |
| 322 | IPI00132042 | [MT3]-DFLIPIGK[MT3]       | 394.91 | 554.37  | 20 | 28.95 |
| 323 | IPI00132042 | [MT3]-DIIFAVK[MT3]        | 543.34 | 604.38  | 20 | 40.41 |
| 324 | IPI00132042 | [MT3]-DIIFAVK[MT3]        | 543.34 | 717.47  | 20 | 40.41 |
| 325 | IPI00132042 | [MT3]-VLEDNSVPQVK[MT3]    | 754.43 | 797.49  | 20 | 49.70 |
| 326 | IPI00132042 | [MT3]-VLEDNSVPQVK[MT3]    | 754.43 | 911.53  | 20 | 49.70 |
| 327 | IPI00132042 | [MT7]-DFLIPIGK[MT7]       | 595.87 | 671.46  | 20 | 42.54 |
| 328 | IPI00132042 | [MT7]-DFLIPIGK[MT7]       | 595.87 | 784.54  | 20 | 42.54 |
| 329 | IPI00132042 | [MT7]-DFLIPIGK[MT7]       | 397.58 | 558.37  | 20 | 28.95 |
| 330 | IPI00132042 | [MT7]-DIIFAVK[MT7]        | 547.35 | 608.39  | 20 | 40.41 |
| 331 | IPI00132042 | [MT7]-DIIFAVK[MT7]        | 547.35 | 721.47  | 20 | 40.41 |
| 332 | IPI00132042 | [MT7]-VLEDNSVPQVK[MT7]    | 758.43 | 801.50  | 20 | 49.70 |

|     |             |                           |        |         |    |       |
|-----|-------------|---------------------------|--------|---------|----|-------|
| 333 | IPI00132042 | [MT7]-VLEDNSVPQVK[MT7]    | 758.43 | 915.54  | 20 | 49.70 |
| 334 | IPI00475031 | [MT3]-LLADPTGAFGK[MT3]    | 685.40 | 817.46  | 20 | 46.66 |
| 335 | IPI00475031 | [MT3]-LLADPTGAFGK[MT3]    | 685.40 | 932.48  | 20 | 46.66 |
| 336 | IPI00475031 | [MT3]-THLPGFVEQAGALK[MT3] | 583.33 | 727.45  | 20 | 34.42 |
| 337 | IPI00475031 | [MT3]-THLPGFVEQAGALK[MT3] | 583.33 | 856.49  | 20 | 34.42 |
| 338 | IPI00475031 | [MT3]-VNLAELFK[MT3]       | 607.37 | 747.44  | 20 | 43.22 |
| 339 | IPI00475031 | [MT3]-VNLAELFK[MT3]       | 607.37 | 860.52  | 20 | 43.22 |
| 340 | IPI00475031 | [MT7]-LLADPTGAFGK[MT7]    | 689.40 | 821.46  | 20 | 46.66 |
| 341 | IPI00475031 | [MT7]-LLADPTGAFGK[MT7]    | 689.40 | 936.49  | 20 | 46.66 |
| 342 | IPI00475031 | [MT7]-THLPGFVEQAGALK[MT7] | 878.50 | 731.45  | 20 | 54.98 |
| 343 | IPI00475031 | [MT7]-THLPGFVEQAGALK[MT7] | 878.50 | 860.50  | 20 | 54.98 |
| 344 | IPI00475031 | [MT7]-THLPGFVEQAGALK[MT7] | 586.00 | 731.45  | 20 | 34.42 |
| 345 | IPI00475031 | [MT7]-THLPGFVEQAGALK[MT7] | 586.00 | 860.50  | 20 | 34.42 |
| 346 | IPI00475031 | [MT7]-VNLAELFK[MT7]       | 611.38 | 751.45  | 20 | 43.22 |
| 347 | IPI00475031 | [MT7]-VNLAELFK[MT7]       | 611.38 | 864.53  | 20 | 43.22 |
| 348 | IPI00223216 | [MT3]-TYEQVLENLQSK[MT3]   | 866.47 | 1070.62 | 20 | 54.63 |
| 349 | IPI00223216 | [MT3]-TYEQVLENLQSK[MT3]   | 866.47 | 1198.68 | 20 | 54.63 |
| 350 | IPI00223216 | [MT3]-TYEQVLENLQSK[MT3]   | 866.47 | 858.47  | 20 | 54.63 |
| 351 | IPI00223216 | [MT3]-VLDASWYSPGTR        | 746.38 | 866.42  | 20 | 49.34 |
| 352 | IPI00223216 | [MT3]-VLDASWYSPGTR        | 746.38 | 953.45  | 20 | 49.34 |
| 353 | IPI00223216 | [MT3]-VLDASWYSPGTR        | 746.38 | 680.34  | 20 | 49.34 |
| 354 | IPI00223216 | [MT7]-TYEQVLENLQSK[MT7]   | 870.47 | 1074.63 | 20 | 54.63 |
| 355 | IPI00223216 | [MT7]-TYEQVLENLQSK[MT7]   | 870.47 | 1202.69 | 20 | 54.63 |
| 356 | IPI00223216 | [MT7]-TYEQVLENLQSK[MT7]   | 870.47 | 862.48  | 20 | 54.80 |
| 357 | IPI00223216 | [MT7]-VLDASWYSPGTR        | 748.39 | 866.42  | 20 | 49.34 |
| 358 | IPI00223216 | [MT7]-VLDASWYSPGTR        | 748.39 | 953.45  | 20 | 49.34 |
| 359 | IPI00223216 | [MT7]-VLDASWYSPGTR        | 748.39 | 680.34  | 20 | 49.43 |
| 360 | IPI00110578 | [MT3]-LQIQVDEK[MT3]       | 626.87 | 758.40  | 20 | 44.08 |
| 361 | IPI00110578 | [MT3]-LQIQVDEK[MT3]       | 626.87 | 871.49  | 20 | 44.08 |
| 362 | IPI00110578 | [MT3]-TVEEALTIK[MT3]      | 642.38 | 814.50  | 20 | 44.77 |
| 363 | IPI00110578 | [MT3]-TVEEALTIK[MT3]      | 642.38 | 943.55  | 20 | 44.77 |
| 364 | IPI00110578 | [MT7]-LQIQVDEK[MT7]       | 630.87 | 762.41  | 20 | 44.08 |
| 365 | IPI00110578 | [MT7]-LQIQVDEK[MT7]       | 630.87 | 875.50  | 20 | 44.08 |
| 366 | IPI00110578 | [MT7]-TVEEALTIK[MT7]      | 646.39 | 818.51  | 20 | 44.77 |
| 367 | IPI00110578 | [MT7]-TVEEALTIK[MT7]      | 646.39 | 947.55  | 20 | 44.77 |
| 368 | IPI00475322 | [MT3]-ALQLLSSANPVR        | 704.92 | 843.47  | 20 | 47.52 |
| 369 | IPI00475322 | [MT3]-ALQLLSSANPVR        | 704.92 | 956.55  | 20 | 47.52 |
| 370 | IPI00475322 | [MT3]-TEPIPVTAK[MT3]      | 618.37 | 655.41  | 20 | 43.71 |
| 371 | IPI00475322 | [MT3]-TEPIPVTAK[MT3]      | 618.37 | 865.55  | 20 | 43.71 |
| 372 | IPI00475322 | [MT7]-ALQLLSSANPVR        | 706.92 | 843.47  | 20 | 47.52 |
| 373 | IPI00475322 | [MT7]-ALQLLSSANPVR        | 706.92 | 956.55  | 20 | 47.52 |
| 374 | IPI00475322 | [MT7]-TEPIPVTAK[MT7]      | 622.38 | 659.42  | 20 | 43.71 |
| 375 | IPI00475322 | [MT7]-TEPIPVTAK[MT7]      | 622.38 | 869.56  | 20 | 43.71 |
| 376 | IPI00120719 | [MT3]-LNDFASAVR           | 566.81 | 650.36  | 20 | 41.44 |
| 377 | IPI00120719 | [MT3]-LNDFASAVR           | 566.81 | 765.39  | 20 | 41.44 |
| 378 | IPI00120719 | [MT3]-LNDFASAVR           | 566.81 | 879.43  | 20 | 41.44 |
| 379 | IPI00120719 | [MT3]-LNDFASAVR           | 378.21 | 432.26  | 20 | 28.47 |
| 380 | IPI00120719 | [MT7]-LNDFASAVR           | 568.81 | 650.36  | 20 | 41.44 |
| 381 | IPI00120719 | [MT7]-LNDFASAVR           | 568.81 | 765.39  | 20 | 41.44 |
| 382 | IPI00120719 | [MT7]-LNDFASAVR           | 568.81 | 879.43  | 20 | 41.44 |
| 383 | IPI00120719 | [MT7]-LNDFASAVR           | 379.54 | 432.26  | 20 | 28.47 |
| 384 | IPI00135939 | [MT3]-VPEAVADV            | 548.31 | 630.36  | 20 | 40.63 |
| 385 | IPI00135939 | [MT3]-VPEAVADV            | 548.31 | 759.40  | 20 | 40.63 |
| 386 | IPI00135939 | [MT7]-VPEAVADV            | 550.31 | 630.36  | 20 | 40.63 |
| 387 | IPI00135939 | [MT7]-VPEAVADV            | 550.31 | 759.40  | 20 | 40.63 |
| 388 | IPI00136201 | [MT3]-LDLSSLAYSGK[MT3]    | 717.40 | 778.45  | 20 | 48.07 |

|     |             |                          |        |        |    |       |
|-----|-------------|--------------------------|--------|--------|----|-------|
| 389 | IPI00136201 | [MT3]-LDLSSLAYSGK[MT3]   | 478.60 | 594.32 | 20 | 31.38 |
| 390 | IPI00136201 | [MT3]-LDLSSLAYSGK[MT3]   | 478.60 | 778.45 | 20 | 31.38 |
| 391 | IPI00136201 | [MT3]-LDLSSLAYSGK[MT3]   | 478.60 | 665.36 | 20 | 31.38 |
| 392 | IPI00136201 | [MT3]-QSVC[CAM]VVHLR     | 619.35 | 623.40 | 20 | 43.75 |
| 393 | IPI00136201 | [MT3]-QSVC[CAM]VVHLR     | 721.41 | 782.45 | 20 | 48.07 |
| 394 | IPI00136201 | [MT7]-LDLSSLAYSGK[MT7]   | 413.23 | 623.40 | 20 | 29.48 |
| 395 | IPI00136201 | [MT7]-LDLSSLAYSGK[MT7]   | 721.41 | 598.33 | 20 | 48.07 |
| 396 | IPI00136201 | [MT7]-LDLSSLAYSGK[MT7]   | 721.41 | 669.37 | 20 | 48.07 |
| 397 | IPI00136201 | [MT7]-LDLSSLAYSGK[MT7]   | 481.28 | 598.33 | 20 | 31.38 |
| 398 | IPI00136201 | [MT7]-LDLSSLAYSGK[MT7]   | 481.28 | 782.45 | 20 | 31.38 |
| 399 | IPI00136201 | [MT7]-LDLSSLAYSGK[MT7]   | 481.28 | 669.37 | 20 | 31.38 |
| 400 | IPI00136201 | [MT7]-QSVC[CAM]VVHLR     | 621.35 | 623.40 | 20 | 43.75 |
| 401 | IPI00136201 | [MT7]-QSVC[CAM]VVHLR     | 613.83 | 684.37 | 20 | 43.51 |
| 402 | IPI00224210 | [MT3]-AFPSYFSK[MT3]      | 414.57 | 623.40 | 20 | 29.48 |
| 403 | IPI00224210 | [MT3]-AFPSYFSK[MT3]      | 613.83 | 771.40 | 20 | 43.51 |
| 404 | IPI00224210 | [MT3]-AFPSYFSK[MT3]      | 613.83 | 868.46 | 20 | 43.51 |
| 405 | IPI00224210 | [MT3]-EFGNLAR            | 473.76 | 530.30 | 20 | 37.35 |
| 406 | IPI00224210 | [MT3]-EFGNLAR            | 473.76 | 677.37 | 20 | 37.35 |
| 407 | IPI00224210 | [MT3]-HVISYSLSPFEQR      | 568.30 | 676.34 | 20 | 33.98 |
| 408 | IPI00224210 | [MT3]-HVISYSLSPFEQR      | 568.30 | 763.37 | 20 | 33.98 |
| 409 | IPI00224210 | [MT7]-AFPSYFSK[MT7]      | 617.84 | 688.38 | 20 | 43.51 |
| 410 | IPI00224210 | [MT7]-AFPSYFSK[MT7]      | 617.84 | 775.41 | 20 | 43.51 |
| 411 | IPI00224210 | [MT7]-AFPSYFSK[MT7]      | 617.84 | 872.46 | 20 | 43.51 |
| 412 | IPI00224210 | [MT7]-EFGNLAR            | 475.76 | 530.30 | 20 | 37.35 |
| 413 | IPI00224210 | [MT7]-EFGNLAR            | 475.76 | 677.37 | 20 | 37.35 |
| 414 | IPI00224210 | [MT7]-HVISYSLSPFEQR      | 853.95 | 676.34 | 20 | 53.99 |
| 415 | IPI00224210 | [MT7]-HVISYSLSPFEQR      | 853.95 | 763.37 | 20 | 53.99 |
| 416 | IPI00224210 | [MT7]-HVISYSLSPFEQR      | 569.64 | 676.34 | 20 | 33.98 |
| 417 | IPI00224210 | [MT7]-HVISYSLSPFEQR      | 569.64 | 763.37 | 20 | 33.98 |
| 418 | IPI00760006 | [MT3]-VYFHTDAAQAVGK[MT3] | 562.97 | 642.39 | 20 | 33.83 |
| 419 | IPI00760006 | [MT3]-VYFHTDAAQAVGK[MT3] | 562.97 | 713.43 | 20 | 33.83 |
| 420 | IPI00760006 | [MT3]-VYFHTDAAQAVGK[MT3] | 562.97 | 784.47 | 20 | 33.83 |
| 421 | IPI00760006 | [MT7]-VYFHTDAAQAVGK[MT7] | 565.64 | 646.40 | 20 | 33.83 |
| 422 | IPI00760006 | [MT7]-VYFHTDAAQAVGK[MT7] | 565.64 | 717.44 | 20 | 33.83 |
| 423 | IPI00760006 | [MT7]-VYFHTDAAQAVGK[MT7] | 847.96 | 788.47 | 20 | 53.63 |
| 424 | IPI00760006 | [MT7]-VYFHTDAAQAVGK[MT7] | 601.86 | 727.42 | 20 | 42.98 |
| 425 | IPI00116228 | [MT3]-HVVFGHVK[MT3]      | 565.64 | 788.47 | 20 | 33.83 |
| 426 | IPI00116228 | [MT3]-HVVFGHVK[MT3]      | 601.86 | 826.49 | 20 | 42.98 |
| 427 | IPI00116228 | [MT3]-HVVFGHVK[MT3]      | 401.58 | 523.34 | 20 | 29.15 |
| 428 | IPI00116228 | [MT3]-LLGLLSGPR          | 533.34 | 642.39 | 20 | 39.97 |
| 429 | IPI00116228 | [MT3]-LLGLLSGPR          | 533.34 | 699.41 | 20 | 39.97 |
| 430 | IPI00116228 | [MT7]-HVVFGHVK[MT7]      | 605.87 | 731.43 | 20 | 42.98 |
