# Supplementary material
Source: PubMed Central journal article supplement (PMC3805328)
Supplement: pr400219s_si_002.pdf [file pr400219s_si_002.pdf]

**Supplementary Table 2. List of differentially expressed hepatic mitochondrial proteins detected by MS with the partial loss of *Sod2***

Protein fold change ratio relative to wildtype mice as detected by the 4-plex iTRAQ.

This table comprises of one tab:

**WT versus HET**      Summary of *Sod2*<sup>+/-</sup> protein fold change using 4-plex iTRAQ

**Column description**

**UNUSED:**              A measure of all the peptide evidence for a protein that is not better explained by a higher ranked protein.  
                              Considered as the true indicator of protein confidence

**TOTAL:**                A measure of all the peptide evidence for a protein

**% Cov:**                Percentage of amino acids detected by MS

**ACCESSION:**        IPI protein identifier

**NAME:**                Protein name

**AVG FOLD CHANGE:** Average fold change of *Sod2*<sup>+/-</sup> / *Sod2*<sup>+/+</sup>

**LOG<sub>2</sub>:**                 Log base 2 of average fold change

**P-VALUE**              Quantification *P*-value

\* NA values for proteins identified by 2 peptides which is insufficient for *P*-value calculation

| UNUSE |        |        |                        | AVG FOLD                                                                           |        | AVG P-                  |
|-------|--------|--------|------------------------|------------------------------------------------------------------------------------|--------|-------------------------|
| NO. D | TOTAL  | % Cov  | ACCESSION              | NAME                                                                               | CHANGE | LOG <sub>2</sub> VALUE* |
| 1     | 138.01 | 138.01 | 50.7 IPI:IPI00111908.8 | Gene_Symbol=Cps1 Carbamoyl-phosphate synthase [ammonia], mitochondrial             | 1.3365 | 0.4184 0                |
| 2     | 75.53  | 75.53  | 75 IPI:IPI00869393.1   | Gene_Symbol=Cat catalase                                                           | 1.0964 | 0.1327 0.00567          |
| 3     | 73.64  | 73.64  | 66.1 IPI:IPI00828479.1 | Gene_Symbol=Acox1 Acyl-Coenzyme A oxidase 1, palmitoyl                             | 0.8368 | -0.2571 0.00045         |
| 4     | 61.66  | 61.66  | 54.2 IPI:IPI00554834.2 | Gene_Symbol=Ehhadh Peroxisomal bifunctional enzyme                                 | 1.0241 | 0.0343 0.2714           |
| 5     | 49.98  | 49.98  | 57 IPI:IPI00133522.1   | Gene_Symbol=P4hb Protein disulfide-isomerase                                       | 0.7764 | -0.3652 0.00258         |
| 6     | 48.65  | 48.65  | 66.7 IPI:IPI00223367.5 | Gene_Symbol=Uox Uricase                                                            | 1.1821 | 0.2413 #####            |
| 7     | 39.45  | 39.45  | 30.9 IPI:IPI00134131.2 | Gene_Symbol=Scp2 Isoform SCPx of Non-specific lipid-transfer protein               | 1.0063 | 0.0090 0.1938           |
| 8     | 39.28  | 39.28  | 40 IPI:IPI00114209.1   | Gene_Symbol=Glud1 Glutamate dehydrogenase 1, mitochondrial                         | 1.2700 | 0.3448 0.0014           |
| 9     | 38.49  | 38.49  | 44.1 IPI:IPI00319992.1 | Gene_Symbol=Hspa5 78 kDa glucose-regulated protein                                 | 0.9311 | -0.1030 0.2786          |
| 10    | 38.39  | 40.39  | 49.7 IPI:IPI00230108.6 | Gene_Symbol=Pdia3 Protein disulfide-isomerase A3                                   | 1.0625 | 0.0875 0.1803           |
| 11    | 37.08  | 37.08  | 52.7 IPI:IPI00468481.2 | Gene_Symbol=Atp5b ATP synthase subunit beta, mitochondrial                         | 1.1163 | 0.1587 0.0079           |
| 12    | 35.97  | 35.97  | 31.1 IPI:IPI00114710.2 | Gene_Symbol=Pcx Activated spleen cDNA, RIKEN full-length enriched library, clone:F | 0.9730 | -0.0396 0.3475          |
| 13    | 33.23  | 33.23  | 32.8 IPI:IPI00331628.5 | Gene_Symbol=Hsd17b4 Peroxisomal multifunctional enzyme type 2                      | 1.0707 | 0.0986 0.0473           |
| 14    | 30.78  | 30.78  | 56.4 IPI:IPI00653158.1 | Gene_Symbol=Acaa2 Putative uncharacterized protein                                 | 1.2022 | 0.2656 0.01283          |
| 15    | 28.26  | 28.26  | 48.6 IPI:IPI00130280.1 | Gene_Symbol=Atp5a1 ATP synthase subunit alpha, mitochondrial                       | 1.1714 | 0.2283 0.0357           |
| 16    | 27.18  | 27.18  | 38 IPI:IPI00420718.4   | Gene_Symbol=Hmgcs2 Hydroxymethylglutaryl-CoA synthase, mitochondrial               | 1.2521 | 0.3244 0.00295          |
| 17    | 26.72  | 26.72  | 46.7 IPI:IPI00122139.3 | Gene_Symbol=Acaa1b;Acaa1a 3-ketoacyl-CoA thiolase B, peroxisomal                   | 0.9609 | -0.0576 0.052           |
| 18    | 26.44  | 26.44  | 33.8 IPI:IPI00387289.3 | Gene_Symbol=Ces3 Carboxylesterase 3                                                | 0.9145 | -0.1289 0.1442          |
| 19    | 26.18  | 26.18  | 26 IPI:IPI00223092.5   | Gene_Symbol=Hadha Trifunctional enzyme subunit alpha, mitochondrial                | 1.0859 | 0.1189 0.22255          |
| 20    | 26.02  | 26.02  | 39.5 IPI:IPI00117312.1 | Gene_Symbol=Got2 Aspartate aminotransferase, mitochondrial                         | 1.1223 | 0.1664 0.1024           |
| 21    | 25.52  | 25.52  | 41.6 IPI:IPI00111218.1 | Gene_Symbol=Aldh2 Aldehyde dehydrogenase, mitochondrial                            | 1.2663 | 0.3406 0.0094           |
| 22    | 25.02  | 25.02  | 24.4 IPI:IPI00316314.1 | Gene_Symbol=Hacl1 2-hydroxyacyl-CoA lyase 1                                        | 1.0101 | 0.0145 0.46305          |
| 23    | 24.07  | 24.07  | 24.9 IPI:IPI00129526.1 | Gene_Symbol=Hsp90b1 Endoplasmic                                                    | 1.1891 | 0.2498 NA               |
| 24    | 23.82  | 23.82  | 36.5 IPI:IPI00123639.1 | Gene_Symbol=Calr Calreticulin                                                      | 1.2390 | 0.3092 0.1216           |
| 25    | 22.97  | 22.97  | 25.5 IPI:IPI00330747.2 | Gene_Symbol=Nphp3;Acad11 Acyl-CoA dehydrogenase family member 11                   | 1.0782 | 0.1086 0.2411           |
| 26    | 22.63  | 22.63  | 36.5 IPI:IPI00321617.1 | Gene_Symbol=Ephx2 Isoform 1 of Epoxide hydrolase 2                                 | 1.1846 | 0.2443 0.08015          |
| 27    | 21.05  | 21.05  | 30.8 IPI:IPI00405699.2 | Gene_Symbol=Aldh4a1 Delta-1-pyrroline-5-carboxylate dehydrogenase, mitochondrial   | 1.2313 | 0.3002 0.01517          |
| 28    | 20.91  | 20.91  | 32.7 IPI:IPI00880839.1 | Gene_Symbol=Hspa9 heat shock protein 9                                             | 1.1068 | 0.1464 0.16515          |
| 29    | 20.72  | 20.72  | 20.9 IPI:IPI00857226.1 | Gene_Symbol=Acsl1 78 kDa protein                                                   | 1.2222 | 0.2895 0.03793          |
| 30    | 19.31  | 19.31  | 33 IPI:IPI00154054.1   | Gene_Symbol=Acat1 Acetyl-CoA acetyltransferase, mitochondrial                      | 1.1826 | 0.2419 0.2654           |
| 31    | 19.27  | 19.27  | 40.3 IPI:IPI00129178.1 | Gene_Symbol=Oat Ornithine aminotransferase, mitochondrial                          | 1.9512 | 0.9643 0.01043          |
| 32    | 18.18  | 18.18  | 40.8 IPI:IPI00130950.1 | Gene_Symbol=Bhmt Betaine--homocysteine S-methyltransferase 1                       | 0.7033 | -0.5077 0.01315         |
| 33    | 17.54  | 17.54  | 30.2 IPI:IPI00776257.1 | Gene_Symbol=Otc Otc protein                                                        | 1.3752 | 0.4597 0.00018          |
| 34    | 17.15  | 17.15  | 47.2 IPI:IPI00121788.1 | Gene_Symbol=Prdx1 Peroxiredoxin-1                                                  | 0.9771 | -0.0334 0.32355         |
| 35    | 16.87  | 16.87  | 31.6 IPI:IPI00134746.5 | Gene_Symbol=Ass1 Argininosuccinate synthase                                        | 0.6739 | -0.5693 0.0256          |
| 36    | 16.84  | 16.84  | 32.9 IPI:IPI00461964.3 | Gene_Symbol=Aldh6a1 Methylmalonate-semialdehyde dehydrogenase [acylating], mit     | 1.2957 | 0.3737 0.01275          |
| 37    | 15.92  | 15.92  | 25.1 IPI:IPI00308885.6 | Gene_Symbol=Hspd1 Isoform 1 of 60 kDa heat shock protein, mitochondrial            | 0.9942 | -0.0085 0.2862          |
| 38    | 15.7   | 15.7   | 49.2 IPI:IPI00895984.1 | Gene_Symbol=Mup1 Major urinary protein 1                                           | 2.2244 | 1.1534 0.0025           |
| 39    | 15.63  | 17.65  | 17 IPI:IPI00271951.5   | Gene_Symbol=Pdia4 protein disulfide isomerase associated 4                         | 0.8400 | -0.2516 0.2748          |

|    |       |       |      |                   |                                                                                       |        |         |         |
|----|-------|-------|------|-------------------|---------------------------------------------------------------------------------------|--------|---------|---------|
| 40 | 15.04 | 15.04 | 19.3 | IPI:IPI00307837.6 | Gene_Symbol=Eef1a1 Elongation factor 1-alpha 1                                        | 0.8866 | -0.1737 | 0.0434  |
| 41 | 15.03 | 15.03 | 38   | IPI:IPI00848492.1 | Electron transferring flavoprotein, beta polypeptide isoform 2 (Score:508 Exp: 4e-144 | 1.2747 | 0.3502  | 0.0121  |
| 42 | 14.96 | 14.96 | 31.3 | IPI:IPI00127206.6 | Gene_Symbol=Aldob Fructose-bisphosphate aldolase B                                    | 0.8551 | -0.2259 | 0.0348  |
| 43 | 14.59 | 14.59 | 32.2 | IPI:IPI00125325.1 | Gene_Symbol=Decr2 Peroxisomal 2,4-dienoyl-CoA reductase                               | 0.9780 | -0.0321 | 0.5579  |
| 44 | 14.16 | 14.16 | 38.5 | IPI:IPI00121051.3 | Gene_Symbol=Gstk1 Glutathione S-transferase kappa 1                                   | 1.7967 | 0.8454  | NA      |
| 45 | 14.09 | 14.09 | 24.4 | IPI:IPI00553576.3 | Gene_Symbol=Abcd3 ATP-binding cassette, sub-family D, member 3                        | 1.2306 | 0.2993  | 0.0075  |
| 46 | 13.92 | 13.92 | 19.7 | IPI:IPI00309035.2 | Gene_Symbol=Rpn1 Dolichyl-diphosphooligosaccharide--protein glycosyltransferase s     | 0.9294 | -0.1056 | 0.3916  |
| 47 | 13.78 | 13.78 | 15.3 | IPI:IPI00122633.3 | Gene_Symbol=Acsf2 Acyl-CoA synthetase family member 2, mitochondrial                  | 1.3406 | 0.4229  | 0.08045 |
| 48 | 13.68 | 13.68 | 24   | IPI:IPI00136213.5 | Gene_Symbol=Sardh Sarcosine dehydrogenase, mitochondrial                              | 1.0657 | 0.0917  | 0.32605 |
| 49 | 13.65 | 13.65 | 23.6 | IPI:IPI00115607.3 | Gene_Symbol=Hadhb Trifunctional enzyme subunit beta, mitochondrial                    | 1.1247 | 0.1695  | 0.08    |
| 50 | 13.31 | 13.32 | 24.7 | IPI:IPI00875110.1 | Gene_Symbol=ldh2 52 kDa protein                                                       | 1.2787 | 0.3547  | 0.31345 |
| 51 | 13.23 | 13.23 | 20.5 | IPI:IPI00314202.5 | Gene_Symbol=Baat Bile acid-CoA:amino acid N-acyltransferase                           | 0.9056 | -0.1430 | 0.1275  |
| 52 | 13.1  | 13.1  | 57.1 | IPI:IPI00831055.2 | Gene_Symbol=- Beta-globin                                                             | 0.3565 | -1.4882 | 0.00308 |
| 53 | 12.9  | 12.9  | 30.4 | IPI:IPI00113517.1 | Gene_Symbol=Ctsb Cathepsin B                                                          | 1.0735 | 0.1023  | 0.4338  |
| 54 | 12.89 | 12.89 | 35.6 | IPI:IPI00890322.1 | Gene_Symbol=Bdh1 3-hydroxybutyrate dehydrogenase, type 1                              | 0.9697 | -0.0445 | 0.4557  |
| 55 | 12.6  | 12.6  | 25.9 | IPI:IPI00882287.1 | Gene_Symbol=Etfdh Etfdh protein                                                       | 1.1100 | 0.1506  | 0.1852  |
| 56 | 12.57 | 12.57 | 37.3 | IPI:IPI00323592.2 | Gene_Symbol=Mdh2 Malate dehydrogenase, mitochondrial                                  | 1.2183 | 0.2849  | 0.4488  |
| 57 | 12.37 | 12.37 | 26.7 | IPI:IPI00134870.3 | Gene_Symbol=Acox2 Peroxisomal acyl-coenzyme A oxidase 2                               | 0.9183 | -0.1229 | 0.0829  |
| 58 | 12.35 | 12.35 | 25.4 | IPI:IPI00129963.1 | Gene_Symbol=Phyh Phytanoyl-CoA dioxxygenase, peroxisomal                              | 1.0298 | 0.0424  | 0.4422  |
| 59 | 12.19 | 16.51 | 26.2 | IPI:IPI00128399.3 | Gene_Symbol=AU018778 Adult male colon cDNA, RIKEN full-length enriched library, c     | 0.9231 | -0.1155 | 0.274   |
| 60 | 12.19 | 12.19 | 36.7 | IPI:IPI00117914.3 | Gene_Symbol=Arg1 Arginase-1                                                           | 0.9074 | -0.1402 | 0.0427  |
| 61 | 12.12 | 12.12 | 48.1 | IPI:IPI00223216.5 | Gene_Symbol=Tst Thiosulfate sulfurtransferase                                         | 1.4592 | 0.5452  | 0.03945 |
| 62 | 12.1  | 12.1  | 28.5 | IPI:IPI00110719.1 | Gene_Symbol=Pipox Peroxisomal sarcosine oxidase                                       | 1.4121 | 0.4978  | 0.00185 |
| 63 | 11.77 | 11.77 | 16.5 | IPI:IPI00123379.1 | Gene_Symbol=Hdlbp Vigilin                                                             | 0.8967 | -0.1573 | 0.0508  |
| 64 | 11.71 | 11.71 | 18.6 | IPI:IPI00134503.1 | Gene_Symbol=Cyp2c29 Cytochrome P450 2C29                                              | 2.2443 | 1.1663  | 0.03623 |
| 65 | 11.39 | 11.39 | 17.2 | IPI:IPI00381178.3 | Gene_Symbol=Es31 Isoform 1 of Liver carboxylesterase 31                               | 1.3862 | 0.4711  | 0.0457  |
| 66 | 11.15 | 11.15 | 30.1 | IPI:IPI00135686.2 | Gene_Symbol=Ppib peptidylprolyl isomerase B                                           | 1.2300 | 0.2987  | 0.2844  |
| 67 | 10.99 | 10.99 | 29.1 | IPI:IPI00320462.4 | Gene_Symbol=Bphl Putative uncharacterized protein                                     | 1.0932 | 0.1285  | 0.0081  |
| 68 | 10.93 | 10.93 | 21.3 | IPI:IPI00119203.4 | Gene_Symbol=Acadvl Very long-chain specific acyl-CoA dehydrogenase, mitochondria      | 1.1477 | 0.1987  | 0.1047  |
| 69 | 10.92 | 10.92 | 52.2 | IPI:IPI00230113.5 | Gene_Symbol=Cyb5 Cytochrome b5                                                        | 1.0379 | 0.0537  | 0.0508  |
| 70 | 10.83 | 10.83 | 19.2 | IPI:IPI00116074.1 | Gene_Symbol=Aco2 Aconitate hydratase, mitochondrial                                   | 1.0444 | 0.0627  | 0.0968  |
| 71 | 10.74 | 10.74 | 29.2 | IPI:IPI00760085.1 | Gene_Symbol=Agxt Isoform Peroxisomal of Serine--pyruvate aminotransferase, mitoch     | 0.8776 | -0.1884 | 0.21675 |
| 72 | 10.69 | 10.69 | 17.6 | IPI:IPI00134961.1 | Gene_Symbol=Acadm Medium-chain specific acyl-CoA dehydrogenase, mitochondrial         | 1.2639 | 0.3378  | 0.13047 |
| 73 | 10.37 | 10.37 | 30.9 | IPI:IPI00894588.1 | Gene_Symbol=Acadl acyl-Coenzyme A dehydrogenase, long-chain                           | 1.0032 | 0.0046  | 0.4222  |
| 74 | 10.34 | 10.34 | 23.4 | IPI:IPI00321644.3 | Gene_Symbol=Cyp2d26 Cytochrome P450 2D26                                              | 1.0759 | 0.1055  | 0.26127 |
| 75 | 10.03 | 10.03 | 44.4 | IPI:IPI00845802.1 | Gene_Symbol=Hba-a1;Hba-a2 hemoglobin alpha, adult chain 2                             | 0.7561 | -0.4034 | 0.2811  |
| 76 | 10    | 10    | 22.4 | IPI:IPI00387379.1 | Gene_Symbol=Decr1 2,4-dienoyl-CoA reductase, mitochondrial                            | 1.0758 | 0.1054  | 0.4826  |
| 77 | 9.87  | 9.87  | 30.1 | IPI:IPI00881253.1 | Gene_Symbol=Rpl5 Blastocyst blastocyst cDNA, RIKEN full-length enriched library, clc  | 0.8408 | -0.2501 | 0.42093 |
| 78 | 9.79  | 9.79  | 18.5 | IPI:IPI00226140.5 | Gene_Symbol=Maob Amine oxidase [flavin-containing] B                                  | 1.2530 | 0.3253  | 0.0178  |
| 79 | 9.6   | 9.6   | 29   | IPI:IPI00331241.8 | Gene_Symbol=Gsta3 Glutathione S-transferase A3                                        | 0.8658 | -0.2080 | 0.0607  |
| 80 | 9.53  | 9.53  | 13.8 | IPI:IPI00123924.1 | Gene_Symbol=Serpina1d Alpha-1-antitrypsin 1-4                                         | 1.0017 | 0.0024  | NA      |

|     |      |       |      |                   |                                                                             |        |         |         |
|-----|------|-------|------|-------------------|-----------------------------------------------------------------------------|--------|---------|---------|
| 81  | 9.52 | 9.52  | 16.9 | IPI:IPI00125220.6 | Gene_Symbol=Ctsz Cathepsin Z                                                | 1.5412 | 0.6240  | 0.15715 |
| 82  | 9.44 | 9.44  | 26.5 | IPI:IPI00119755.1 | Gene_Symbol=Nudt7 Isoform 2 of Peroxisomal coenzyme A diphosphatase NUDT7   | 0.9860 | -0.0203 | NA      |
| 83  | 9.4  | 9.4   | 10.3 | IPI:IPI00130661.1 | Gene_Symbol=Tpp1 Tripeptidyl-peptidase 1                                    | 1.1445 | 0.1947  | 0.018   |
| 84  | 9.39 | 9.39  | 27.6 | IPI:IPI00454049.4 | Gene_Symbol=Echs1 Enoyl-CoA hydratase, mitochondrial                        | 1.2600 | 0.3335  | 0.0879  |
| 85  | 9.34 | 9.34  | 32.5 | IPI:IPI00323571.1 | Gene_Symbol=ApoE Apolipoprotein E                                           | 0.6721 | -0.5732 | 0.0398  |
| 86  | 9.31 | 9.31  | 12.8 | IPI:IPI00139788.2 | Gene_Symbol=Trf Serotransferrin                                             | 1.0543 | 0.0763  | 0.2113  |
| 87  | 9.22 | 9.22  | 26.6 | IPI:IPI00331092.7 | Gene_Symbol=Rps4x 40S ribosomal protein S4, X isoform                       | 0.8744 | -0.1936 | 0.1761  |
| 88  | 9.1  | 9.1   | 17.3 | IPI:IPI00465739.2 | Gene_Symbol=Cyp2b10 Putative uncharacterized protein                        | 1.9476 | 0.9617  | 0.0287  |
| 89  | 8.92 | 8.94  | 19.8 | IPI:IPI00331596.6 | Gene_Symbol=Pecr Peroxisomal trans-2-enoyl-CoA reductase                    | 1.1176 | 0.1604  | 0.25973 |
| 90  | 8.83 | 8.83  | 17.9 | IPI:IPI00128287.1 | Gene_Symbol=Cyp1a2 Cytochrome P450 1A2                                      | 0.7860 | -0.3474 | 0.22217 |
| 91  | 8.8  | 8.8   | 26.2 | IPI:IPI00114331.4 | Gene_Symbol=Amacr Alpha-methylacyl-CoA racemase                             | 1.0016 | 0.0023  | 0.0843  |
| 92  | 8.69 | 8.69  | 17.4 | IPI:IPI00153144.3 | Gene_Symbol=Suox Sulfite oxidase, mitochondrial                             | 1.2328 | 0.3019  | 0.0485  |
| 93  | 8.54 | 13.77 | 26.5 | IPI:IPI00115867.4 | Gene_Symbol=Ces1 Liver carboxylesterase 1                                   | 1.0332 | 0.0471  | 0.75    |
| 94  | 8.51 | 8.51  | 15.1 | IPI:IPI00122362.1 | Gene_Symbol=Pdia5 Protein disulfide-isomerase A5                            | 0.7539 | -0.4076 | NA      |
| 95  | 8.35 | 8.35  | 10.6 | IPI:IPI00120165.1 | Gene_Symbol=Crot Peroxisomal carnitine O-octanoyltransferase                | 0.8881 | -0.1712 | 0.0247  |
| 96  | 8.29 | 8.29  | 26.2 | IPI:IPI00120123.1 | Gene_Symbol=Dmgdh Dimethylglycine dehydrogenase, mitochondrial              | 0.9954 | -0.0067 | NA      |
| 97  | 8.29 | 8.29  | 35.1 | IPI:IPI00785323.1 | Gene_Symbol=Cyp2e1 Cytochrome P450 2E1                                      | 1.2721 | 0.3472  | 0.0213  |
| 98  | 8.12 | 8.12  | 13.6 | IPI:IPI00123129.1 | Gene_Symbol=Snd1 Staphylococcal nuclease domain-containing protein 1        | 0.8709 | -0.1994 | 0.1166  |
| 99  | 8.11 | 8.11  | 22.6 | IPI:IPI00116221.2 | Gene_Symbol=Lactb2 Beta-lactamase-like protein 2                            | 1.1568 | 0.2101  | 0.0493  |
| 100 | 8.07 | 8.07  | 23.1 | IPI:IPI00331251.1 | Gene_Symbol=Acads Putative uncharacterized protein                          | 1.1007 | 0.1384  | 0.0783  |
| 101 | 7.96 | 7.96  | 15.8 | IPI:IPI00653598.2 | Gene_Symbol=Uqcrc1 ubiquinol-cytochrome c reductase core protein 1          | 0.9485 | -0.0762 | 0.7187  |
| 102 | 7.82 | 7.82  | 26.3 | IPI:IPI00626790.3 | Gene_Symbol=Glul Glutamine synthetase                                       | 0.7169 | -0.4803 | 0.03445 |
| 103 | 7.74 | 7.74  | 11.4 | IPI:IPI00554830.2 | Gene_Symbol=Gulo L-gulonolactone oxidase                                    | 0.9229 | -0.1157 | 0.0116  |
| 104 | 7.7  | 7.7   | 13.7 | IPI:IPI00471246.2 | Gene_Symbol=Ivd Isovaleryl-CoA dehydrogenase, mitochondrial                 | 1.1054 | 0.1445  | 0.3325  |
| 105 | 7.6  | 8.98  | 19.5 | IPI:IPI00222489.1 | Gene_Symbol=Ces5 Putative uncharacterized protein                           | 0.9877 | -0.0179 | NA      |
| 106 | 7.59 | 7.63  | 15.5 | IPI:IPI00621548.2 | Gene_Symbol=Por NADPH--cytochrome P450 reductase                            | 1.2271 | 0.2952  | 0.1698  |
| 107 | 7.29 | 7.29  | 14.8 | IPI:IPI00127841.3 | Gene_Symbol=Slc25a5 ADP/ATP translocase 2                                   | 1.2569 | 0.3299  | 0.2045  |
| 108 | 7.15 | 7.15  | 9.5  | IPI:IPI00113141.1 | Gene_Symbol=Cs Citrate synthase, mitochondrial                              | 1.1854 | 0.2453  | 0.049   |
| 109 | 6.94 | 6.94  | 37.3 | IPI:IPI00263863.8 | Gene_Symbol=Hspe1 10 kDa heat shock protein, mitochondrial                  | 1.3037 | 0.3826  | NA      |
| 110 | 6.93 | 6.93  | 26.6 | IPI:IPI00117978.1 | Gene_Symbol=Cox4i1 Cytochrome c oxidase subunit 4 isoform 1, mitochondrial  | 1.0480 | 0.0676  | NA      |
| 111 | 6.92 | 6.92  | 7.3  | IPI:IPI00658539.1 | Gene_Symbol=Ctsa cathepsin A isoform a                                      | 0.8500 | -0.2345 | 0.3115  |
| 112 | 6.9  | 6.9   | 23.6 | IPI:IPI00222496.3 | Gene_Symbol=Pdia6 Putative uncharacterized protein                          | 1.2207 | 0.2877  | 0.38555 |
| 113 | 6.9  | 6.9   | 47.6 | IPI:IPI00125929.2 | Gene_Symbol=Ndufa4 NADH dehydrogenase [ubiquinone] 1 alpha subcomplex subun | 1.1127 | 0.1540  | 0.3455  |
| 114 | 6.74 | 6.74  | 26   | IPI:IPI00624210.3 | Gene_Symbol=EG240549 Glycine N-acyltransferase-like protein                 | 1.1581 | 0.2118  | 0.1516  |
| 115 | 6.66 | 6.67  | 14.7 | IPI:IPI00849363.1 | Gene_Symbol=Cyp2c69 similar to RIKEN cDNA C730004C24 gene isoform 2         | 0.8440 | -0.2447 | NA      |
| 116 | 6.54 | 6.54  | 33.6 | IPI:IPI00130804.1 | Gene_Symbol=Ech1 Delta(3,5)-Delta(2,4)-dienoyl-CoA isomerase, mitochondrial | 1.4794 | 0.5650  | 0.0265  |
| 117 | 6.54 | 6.54  | 28.2 | IPI:IPI00221769.5 | Gene_Symbol=Ak3 GTP:AMP phosphotransferase mitochondrial                    | 1.2375 | 0.3074  | NA      |
| 118 | 6.52 | 6.52  | 23.4 | IPI:IPI00173179.3 | Gene_Symbol=Mettl7b Methyltransferase-like protein 7B                       | 0.9726 | -0.0401 | NA      |
| 119 | 6.47 | 6.47  | 33.5 | IPI:IPI00133440.1 | Gene_Symbol=Phb Prohibitin                                                  | 1.0249 | 0.0355  | NA      |
| 120 | 6.41 | 6.41  | 13.9 | IPI:IPI00122862.4 | Gene_Symbol=Mthfd1 C-1-tetrahydrofolate synthase, cytoplasmic               | 1.0297 | 0.0422  | 0.2836  |
| 121 | 6.34 | 6.34  | 26.7 | IPI:IPI00119138.1 | Gene_Symbol=Uqcrc2 Cytochrome b-c1 complex subunit 2, mitochondrial         | 0.9011 | -0.1502 | 0.2222  |

|     |      |      |      |                   |                                                                                                                                                                                  |        |         |         |
|-----|------|------|------|-------------------|----------------------------------------------------------------------------------------------------------------------------------------------------------------------------------|--------|---------|---------|
| 122 | 6.3  | 6.3  | 16.7 | IPI:IPI00874456.1 | Gene_Symbol=Dld Dihydrolipoyl dehydrogenase, mitochondrial                                                                                                                       | 1.3090 | 0.3885  | NA      |
| 123 | 6.3  | 6.3  | 23.4 | IPI:IPI00759904.1 | Gene_Symbol=Cyb5r3 Isoform 2 of NADH-cytochrome b5 reductase 3                                                                                                                   | 0.8025 | -0.3174 | 0.05595 |
| 124 | 6.26 | 6.26 | 16.8 | IPI:IPI00406442.2 | Gene_Symbol=Suclg1 Succinyl-CoA ligase [GDP-forming] subunit alpha, mitochondria                                                                                                 | 1.2143 | 0.2801  | 0.29875 |
| 125 | 6.24 | 6.24 | 16.8 | IPI:IPI00130627.1 | Gene_Symbol=Lgmn Legumain                                                                                                                                                        | 1.2288 | 0.2973  | NA      |
| 126 | 6.21 | 6.21 | 27.4 | IPI:IPI00321718.4 | Gene_Symbol=Phb2 Prohibitin-2                                                                                                                                                    | 0.8284 | -0.2717 | NA      |
| 127 | 6.17 | 6.17 | 16.5 | IPI:IPI00654116.2 | Gene_Symbol=Acsm1 Isoform 2 of Acyl-coenzyme A synthetase ACSM1, mitochondrial                                                                                                   | 1.5906 | 0.6695  | 0.13143 |
| 128 | 6.17 | 6.17 | 12.6 | IPI:IPI00886297.1 | Gene_Symbol=Hspa8 Hspa8 protein                                                                                                                                                  | 0.7710 | -0.3753 | NA      |
| 129 | 6.16 | 6.16 | 13.9 | IPI:IPI00230351.1 | Gene_Symbol=Sdha Succinate dehydrogenase [ubiquinone] flavoprotein subunit, mito                                                                                                 | 0.9737 | -0.0385 | 0.835   |
| 130 | 6.05 | 8.05 | 22.7 | IPI:IPI00874350.1 | Gene_Symbol=Aldh3a2 Putative uncharacterized protein                                                                                                                             | 1.0458 | 0.0645  | NA      |
| 131 | 6.05 | 6.05 | 16.8 | IPI:IPI00116753.4 | Gene_Symbol=Etfa Electron transfer flavoprotein subunit alpha, mitochondrial                                                                                                     | 1.2546 | 0.3272  | 0.072   |
| 132 | 6.04 | 6.04 | 24.4 | IPI:IPI00403233.1 | Gene_Symbol=Chdh 2 days pregnant adult female oviduct cDNA, RIKEN full-length en                                                                                                 | 1.0946 | 0.1304  | NA      |
| 133 | 6.04 | 6.04 | 21.3 | IPI:IPI00338536.1 | Gene_Symbol=Sdhb Succinate dehydrogenase [ubiquinone] iron-sulfur subunit, mitoch<br>ATP synthase, H+ transporting, mitochondrial F0 complex,<br>subunit d ( Score: 327 Exp: 9e- | 1.0642 | 0.0897  | 0.3673  |
| 134 | 6.04 | 6.04 | 40.6 | IPI:IPI00623553.1 | 90)Gene_Symbol=LOC100044492;ENSMUSG00000068706 hypothetical protein                                                                                                              | 1.3363 | 0.4182  | 0.0327  |
| 135 | 6.04 | 6.04 | 10.9 | IPI:IPI00116192.1 | Gene_Symbol=Prdx3 Thioredoxin-dependent peroxide reductase, mitochondrial                                                                                                        | 1.0196 | 0.0279  | 0.7869  |
| 136 | 6.03 | 8.03 | 11   | IPI:IPI00170363.1 | Gene_Symbol=Acsf5 Long-chain-fatty-acid--CoA ligase 5                                                                                                                            | 1.1243 | 0.1690  | NA      |
| 137 | 6.03 | 6.03 | 11.4 | IPI:IPI00466069.3 | Gene_Symbol=Eef2 Elongation factor 2                                                                                                                                             | 0.9769 | -0.0338 | 0.1389  |
| 138 | 6.03 | 6.03 | 21.6 | IPI:IPI00407499.1 | Gene_Symbol=Abat Isoform 1 of 4-aminobutyrate aminotransferase, mitochondrial                                                                                                    | 1.1504 | 0.2022  | 0.0231  |
| 139 | 6.02 | 6.02 | 25.2 | IPI:IPI00379694.4 | Gene_Symbol=Hmgcl 3-hydroxy-3-methylglutaryl-Coenzyme A lyase                                                                                                                    | 1.4001 | 0.4855  | 0.035   |
| 140 | 6    | 6.36 | 16.6 | IPI:IPI00129056.2 | Gene_Symbol=Glyat Isoform 1 of Glycine N-acyltransferase                                                                                                                         | 1.0322 | 0.0457  | 0.2346  |
| 141 | 6    | 6    | 15.7 | IPI:IPI00404551.1 | Gene_Symbol=Ctsd B6-derived CD11 +ve dendritic cells cDNA, RIKEN full-length enri                                                                                                | 0.7689 | -0.3791 | 0.1282  |
| 142 | 6    | 6    | 24.3 | IPI:IPI00132728.2 | Gene_Symbol=Cyc1 Isoform 1 of Cytochrome c1, heme protein, mitochondrial                                                                                                         | 1.1772 | 0.2353  | 0.0196  |
| 143 | 6    | 6    | 43.4 | IPI:IPI00116154.2 | Gene_Symbol=OTTMUSG00000000426;Cox5b;LOC100046079 cytochrome c oxidase                                                                                                           | 1.0005 | 0.0007  | 0.0891  |
| 144 | 6    | 6    | 46.7 | IPI:IPI00265239.1 | cytochrome c, somatic ( Score:210 Exp: 6e-55) Gene_Symbol=ENSMUSG000000062                                                                                                       | 1.2490 | 0.3207  | 0.0852  |
| 145 | 6    | 6    | 24.1 | IPI:IPI00874521.1 | Gene_Symbol=- 17 kDa protein<br>Superoxide dismutase [Cu-Zn]<br>(Score:304 Exp:5e-83) Gene_Symbol=EG667310;LOC545845 hypothetical protein                                        | 0.8601 | -0.2174 | 0.0573  |
| 146 | 6    | 6    | 25.3 | IPI:IPI00135857.3 | isoform 4                                                                                                                                                                        | 0.5966 | -0.7451 | 0.04303 |
| 147 | 6    | 6    | 35.2 | IPI:IPI00128346.1 | Gene_Symbol=Cisd1 CDGSH iron sulfur domain-containing protein 1                                                                                                                  | 1.0375 | 0.0530  | 0.5291  |
| 148 | 6    | 6    | 22   | IPI:IPI00120451.1 | Gene_Symbol=Fabp1 Fatty acid-binding protein, liver                                                                                                                              | 0.9046 | -0.1447 | NA      |
| 149 | 5.8  | 5.8  | 20.7 | IPI:IPI00109109.1 | Gene_Symbol=Sod2 Superoxide dismutase [Mn], mitochondrial                                                                                                                        | 0.5273 | -0.9234 | 0.0287  |
| 150 | 5.79 | 5.79 | 19.8 | IPI:IPI00881401.1 | Gene_Symbol=Cpt2 carnitine palmitoyltransferase 2                                                                                                                                | 1.2442 | 0.3152  | NA      |
| 151 | 5.78 | 5.78 | 16.1 | IPI:IPI00875638.1 | Gene_Symbol=Immt Isoform 3 of Mitochondrial inner membrane protein                                                                                                               | 0.8022 | -0.3179 | 0.028   |
| 152 | 5.7  | 5.7  | 53.5 | IPI:IPI00225390.5 | Gene_Symbol=Cox6b1 Cytochrome c oxidase subunit VIb isoform 1                                                                                                                    | 0.7770 | -0.3640 | NA      |
| 153 | 5.53 | 5.53 | 17.2 | IPI:IPI00895479.1 | Gene_Symbol=2810422J05Rik 27 kDa protein                                                                                                                                         | 0.8830 | -0.1796 | 0.291   |
| 154 | 5.31 | 5.31 | 18.1 | IPI:IPI00230185.5 | Gene_Symbol=Gpd1 Glycerol-3-phosphate dehydrogenase [NAD+], cytoplasmic                                                                                                          | 1.1784 | 0.2368  | NA      |
| 155 | 5.22 | 5.22 | 11.7 | IPI:IPI00884472.1 | Gene_Symbol=Ctsh cathepsin H preproprotein                                                                                                                                       | 1.1335 | 0.1808  | NA      |
| 156 | 5.15 | 5.15 | 9.6  | IPI:IPI00463764.3 | Gene_Symbol=Ugt3a2 UDP-glucuronosyltransferase 3A2                                                                                                                               | 1.3410 | 0.4233  | 0.0623  |
| 157 | 5.12 | 5.12 | 10.3 | IPI:IPI00403058.1 | Gene_Symbol=Ganab Isoform 1 of Neutral alpha-glucosidase AB                                                                                                                      | 0.8631 | -0.2125 | 0.0109  |
| 158 | 5.1  | 5.1  | 25.7 | IPI:IPI00762203.2 | Gene_Symbol=Ftl1 Ferritin light chain 1                                                                                                                                          | 0.8844 | -0.1773 | 0.0715  |

|     |      |      |      |                   |                                                                                     |        |         |         |
|-----|------|------|------|-------------------|-------------------------------------------------------------------------------------|--------|---------|---------|
| 159 | 4.96 | 4.96 | 12.1 | IPI:IPI00331692.1 | Gene_Symbol=Dci Putative uncharacterized protein                                    | 1.2078 | 0.2723  | NA      |
| 160 | 4.93 | 4.93 | 44.3 | IPI:IPI00880613.1 | Gene_Symbol=Ndufb10 18 kDa protein                                                  | 1.5621 | 0.6435  | NA      |
| 161 | 4.85 | 4.85 | 22.4 | IPI:IPI00788331.1 | Gene_Symbol=Gcdh glutaryl-Coenzyme A dehydrogenase                                  | 1.0575 | 0.0807  | 0.2742  |
| 162 | 4.85 | 4.85 | 16.5 | IPI:IPI00666161.1 | Gene_Symbol=EG624124;LOC634044 similar to ribosomal protein S7 isoform 1            | 0.8959 | -0.1586 | 0.13885 |
| 163 | 4.82 | 4.82 | 3.7  | IPI:IPI00624663.3 | Gene_Symbol=Pzp Alpha-2-macroglobulin                                               | 1.1870 | 0.2473  | 0.0099  |
| 164 | 4.82 | 4.82 | 39.3 | IPI:IPI00129516.1 | Gene_Symbol=Uqcrh Cytochrome b-c1 complex subunit 6, mitochondrial                  | 1.0335 | 0.0475  | 0.0642  |
| 165 | 4.68 | 4.68 | 22.3 | IPI:IPI00457852.3 | Gene_Symbol=EG432502 similar to ribosomal protein L6                                | 0.7815 | -0.3557 | NA      |
| 166 | 4.67 | 4.67 | 8.6  | IPI:IPI00387491.1 | Gene_Symbol=Aass Alpha-aminoadipic semialdehyde synthase, mitochondrial             | 1.2373 | 0.3072  | 0.43535 |
| 167 | 4.48 | 4.48 | 27.8 | IPI:IPI00308769.2 | Gene_Symbol=Acot4 Acyl-coenzyme A thioesterase 4                                    | 0.7412 | -0.4321 | NA      |
| 168 | 4.12 | 4.12 | 4    | IPI:IPI00759878.2 | Gene_Symbol=C3 complement component 3                                               | 0.7577 | -0.4004 | NA      |
| 169 | 4.08 | 4.08 | 12.4 | IPI:IPI00331552.4 | Gene_Symbol=Pabpc1 Bone marrow macrophage cDNA, RIKEN full-length enriched li       | 0.8693 | -0.2020 | NA      |
| 170 | 4.06 | 6.06 | 10.1 | IPI:IPI00163011.2 | Gene_Symbol=Txndc5 Thioredoxin domain-containing protein 5                          | 0.8165 | -0.2924 | 0.0021  |
| 171 | 4.06 | 4.06 | 9.3  | IPI:IPI00221569.1 | Gene_Symbol=Zadh2 Zinc-binding alcohol dehydrogenase domain-containing protein :    | 0.9547 | -0.0669 | 0.2949  |
| 172 | 4.03 | 4.03 | 10.7 | IPI:IPI00309073.2 | Gene_Symbol=Mttp Microsomal triglyceride transfer protein B                         | 0.9193 | -0.1214 | NA      |
| 173 | 4.03 | 4.03 | 27.7 | IPI:IPI00323819.3 | Gene_Symbol=Rps20 40S ribosomal protein S20                                         | 0.8686 | -0.2032 | 0.1738  |
| 174 | 4.03 | 4.03 | 26.7 | IPI:IPI00130640.5 | Gene_Symbol=Hrsp12 Ribonuclease UK114                                               | 1.2647 | 0.3388  | 0.0477  |
| 175 | 4.02 | 4.02 | 14.5 | IPI:IPI00776047.1 | Gene_Symbol=Aifm1 Apoptosis-inducing factor, mitochondrion-associated 1             | 1.0357 | 0.0506  | NA      |
| 176 | 4.01 | 4.29 | 10.7 | IPI:IPI00123342.4 | Gene_Symbol=Hyou1 Hypoxia up-regulated protein 1                                    | 1.0932 | 0.1286  | NA      |
| 177 | 4.01 | 4.01 | 7.4  | IPI:IPI00761390.1 | Gene_Symbol=Slc27a2 solute carrier family 27 (fatty acid transporter), member 2     | 1.0392 | 0.0554  | 0.42855 |
| 178 | 4.01 | 4.01 | 21.9 | IPI:IPI00319652.2 | Gene_Symbol=Gpx1 Glutathione peroxidase 1                                           | 1.1824 | 0.2417  | 0.0504  |
| 179 | 4    | 4    | 40.6 | IPI:IPI00880850.1 | Gene_Symbol=Mgst1 26 kDa protein                                                    | 1.7882 | 0.8385  | NA      |
| 180 | 4    | 4    | 8.6  | IPI:IPI00754992.1 | Gene_Symbol=Rpn2 Ribophorin II                                                      | 0.7544 | -0.4067 | 0.3704  |
| 181 | 4    | 4    | 22   | IPI:IPI00453777.2 | Gene_Symbol=Atp5d ATP synthase subunit delta, mitochondrial                         | 0.9944 | -0.0081 | 0.0302  |
| 182 | 4    | 4    | 12.3 | IPI:IPI00336324.1 | Gene_Symbol=Mdh1 Malate dehydrogenase, cytoplasmic                                  | 1.1020 | 0.1401  | 0.1557  |
| 183 | 4    | 4    | 6.9  | IPI:IPI00894832.1 | Gene_Symbol=Ctsc Adult male kidney cDNA, RIKEN full-length enriched library, clone  | 0.9768 | -0.0339 | 0.7359  |
| 184 | 4    | 4    | 12.3 | IPI:IPI00776275.1 | Gene_Symbol=Atp5c1 ATP synthase, H+ transporting, mitochondrial F1 complex, gam     | 1.0295 | 0.0419  | 0.5418  |
| 185 | 4    | 4    | 10.3 | IPI:IPI00308187.1 | Gene_Symbol=Vapb vesicle-associated membrane protein, associated protein B and C    | 0.8909 | -0.1667 | NA      |
| 186 | 3.7  | 3.7  | 40.7 | IPI:IPI00889996.1 | Gene_Symbol=- 10 kDa protein                                                        | 1.0250 | 0.0356  | NA      |
| 187 | 3.35 | 3.35 | 4.6  | IPI:IPI00850133.1 | Gene_Symbol=1300010F03Rik Isoform 1 of Uncharacterized protein KIAA0564 homol       | 0.8891 | -0.1697 | NA      |
| 188 | 3.3  | 3.31 | 8.6  | IPI:IPI00341282.2 | Gene_Symbol=Atp5f1 ATP synthase subunit b, mitochondrial                            | 1.3778 | 0.4624  | NA      |
| 189 | 3.3  | 3.3  | 11.3 | IPI:IPI00462903.1 | Gene_Symbol=Dhrs4 Adult male kidney cDNA, RIKEN full-length enriched library, clon  | 0.9383 | -0.0918 | NA      |
| 190 | 3.3  | 3.3  | 5.5  | IPI:IPI00554860.3 | Gene_Symbol=Lipa lysosomal acid lipase A                                            | 0.8901 | -0.1680 | NA      |
| 191 | 3.26 | 3.26 | 15.3 | IPI:IPI00134058.3 | Gene_Symbol=Txndc4 Thioredoxin domain-containing protein 4                          | 0.8137 | -0.2975 | NA      |
| 192 | 3.23 | 3.23 | 9.9  | IPI:IPI00134809.2 | Gene_Symbol=Dlst Isoform 1 of Dihydrolipoyllysine-residue succinyltransferase compc | 1.1520 | 0.2041  | NA      |
| 193 | 3.1  | 3.1  | 21.2 | IPI:IPI00876005.1 | Gene_Symbol=- 11 kDa protein                                                        | 0.8430 | -0.2464 | NA      |
| 194 | 3.05 | 3.05 | 13.7 | IPI:IPI00278580.6 | Gene_Symbol=EG244913 hypothetical protein                                           | 0.8801 | -0.1843 | NA      |
| 195 | 3    | 3    | 15   | IPI:IPI00127560.1 | Gene_Symbol=Ttr Transthyretin                                                       | 0.8548 | -0.2264 | NA      |
| 196 | 2.89 | 2.89 | 13.5 | IPI:IPI00322760.7 | Gene_Symbol=Prodh proline dehydrogenase                                             | 1.1710 | 0.2277  | NA      |
| 197 | 2.86 | 2.86 | 24.3 | IPI:IPI00555000.2 | Gene_Symbol=Uqcrb Cytochrome b-c1 complex subunit 7                                 | 0.7419 | -0.4308 | NA      |
| 198 | 2.86 | 2.86 | 6.3  | IPI:IPI00387282.4 | Gene_Symbol=Aadac Arylacetamide deacetylase                                         | 0.8349 | -0.2603 | NA      |
| 199 | 2.68 | 2.68 | 9.1  | IPI:IPI00115866.2 | Gene_Symbol=Hagh Hydroxyacylglutathione hydrolase                                   | 0.9905 | -0.0138 | NA      |

|     |      |      |      |                   |                                                                                    |        |         |        |
|-----|------|------|------|-------------------|------------------------------------------------------------------------------------|--------|---------|--------|
| 200 | 2.67 | 2.67 | 9.9  | IPI:IPI00135651.1 | Gene_Symbol=Slc25a13 Calcium-binding mitochondrial carrier protein Aralar2         | 1.3875 | 0.4724  | NA     |
| 201 | 2.63 | 2.63 | 7.7  | IPI:IPI00111960.2 | Gene_Symbol=Gaa Lysosomal alpha-glucosidase                                        | 0.9764 | -0.0345 | NA     |
| 202 | 2.58 | 2.58 | 12.8 | IPI:IPI00753303.2 | Dihydrodipicolinate synthase-like, mitochondrial (Score: 661 Exp:0.0) Gene_Symbol= | 1.2292 | 0.2977  | NA     |
| 203 | 2.48 | 2.48 | 16   | IPI:IPI00626504.2 | Gene_Symbol=EG668300 similar to Acidic ribosomal phosphoprotein P0                 | 1.1733 | 0.2305  | 0.0412 |
| 204 | 2.43 | 2.43 | 7.3  | IPI:IPI00831534.1 | Gene_Symbol=Ephx1 51 kDa protein                                                   | 1.2664 | 0.3407  | NA     |
| 205 | 2.39 | 2.39 | 8.3  | IPI:IPI00755120.2 | Gene_Symbol=Rrbp1 ribosome binding protein 1 isoform a                             | 1.0746 | 0.1038  | NA     |
| 206 | 2.39 | 2.39 | 16   | IPI:IPI00137787.3 | Gene_Symbol=Rpl8 60S ribosomal protein L8                                          | 1.0689 | 0.0961  | NA     |
| 207 | 2.36 | 2.36 | 7    | IPI:IPI00845652.1 | Gene_Symbol=Ogdh Isoform 3 of 2-oxoglutarate dehydrogenase E1 component, mitoc     | 1.0583 | 0.0818  | NA     |
| 208 | 2.35 | 2.35 | 8.4  | IPI:IPI00112128.1 | Gene_Symbol=Hdhd3 Haloacid dehalogenase-like hydrolase domain-containing protei    | 1.0954 | 0.1314  | NA     |
| 209 | 2.26 | 3.41 | 9.7  | IPI:IPI00762185.2 | Gene_Symbol=Mpst 3-mercaptopyruvate sulfurtransferase                              | 1.0445 | 0.0628  | NA     |
| 210 | 2.25 | 2.25 | 5.5  | IPI:IPI00112089.3 | Gene_Symbol=Tmem135 Transmembrane protein 135                                      | 1.1089 | 0.1491  | NA     |
| 211 | 2.24 | 2.24 | 7.1  | IPI:IPI00313236.3 | Gene_Symbol=Slc27a5 Bile acyl-CoA synthetase                                       | 0.9940 | -0.0088 | NA     |
| 212 | 2.23 | 2.23 | 14.1 | IPI:IPI00230540.1 | Gene_Symbol=Vdac1 Isoform Mt-VDAC1 of Voltage-dependent anion-selective chann      | 1.2970 | 0.3751  | NA     |
| 213 | 2.11 | 2.12 | 14.4 | IPI:IPI00831130.1 | Gene_Symbol=Glod4 Isoform 2 of Glyoxalase domain-containing protein 4              | 1.1721 | 0.2291  | NA     |
| 214 | 2.1  | 2.1  | 13.5 | IPI:IPI00454008.1 | Gene_Symbol=Shmt2 Serine hydroxymethyltransferase                                  | 1.0022 | 0.0031  | NA     |
| 215 | 2.08 | 2.08 | 11.3 | IPI:IPI00116748.1 | Gene_Symbol=Ndufa10 NADH dehydrogenase [ubiquinone] 1 alpha subcomplex subu        | 0.8762 | -0.1906 | NA     |
| 216 | 2.06 | 2.06 | 4.1  | IPI:IPI00322936.1 | Gene_Symbol=Plg Plasminogen                                                        | 1.0568 | 0.0797  | NA     |
| 217 | 2.04 | 2.04 | 7.3  | IPI:IPI00410819.3 | Gene_Symbol=Ddost Bone marrow macrophage cDNA, RIKEN full-length enriched libi     | 0.8375 | -0.2558 | NA     |
| 218 | 2.03 | 2.03 | 5.2  | IPI:IPI00855212.1 | Gene_Symbol=1110020G09Rik Isoform 2 of UPF0465 protein C5orf33 homolog             | 1.0351 | 0.0497  | NA     |
| 219 | 2.01 | 2.01 | 9.3  | IPI:IPI00625328.2 | Gene_Symbol=Rnaset2a;Rnaset2b Ribonuclease T2                                      | 0.7112 | -0.4917 | NA     |
| 220 | 2.01 | 2.01 | 4.1  | IPI:IPI00554961.3 | Gene_Symbol=Fmo5 Dimethylaniline monooxygenase [N-oxide-forming] 5                 | 1.4455 | 0.5316  | NA     |
| 221 | 2    | 9.52 | 10.9 | IPI:IPI00129755.2 | Gene_Symbol=Serpina1b Alpha-1-antitrypsin 1-2                                      | 2.1974 | 1.1358  | NA     |
| 222 | 2    | 8.75 | 21.7 | IPI:IPI00460335.1 | Gene_Symbol=Aldh4a1 Aldh4a1 protein                                                | 0.8919 | -0.1651 | NA     |
| 223 | 2    | 2.04 | 7.9  | IPI:IPI00113386.1 | Gene_Symbol=Ethe1 Protein ETHE1, mitochondrial                                     | 1.0901 | 0.1245  | NA     |
| 224 | 2    | 2    | 11.9 | IPI:IPI00606097.1 | Gene_Symbol=Tmprss13 transmembrane protease, serine 13                             | 0.9916 | -0.0121 | 0.0593 |
| 225 | 2    | 2    | 15.3 | IPI:IPI00850377.1 | Gene_Symbol=100039840 similar to Glyceraldehyde-3-phosphate dehydrogenase (G/      | 1.1554 | 0.2084  | NA     |
| 226 | 2    | 2    | 42.4 | IPI:IPI00322562.5 | Gene_Symbol=Rps14 40S ribosomal protein S14                                        | 0.9547 | -0.0669 | NA     |
| 227 | 2    | 2    | 7.3  | IPI:IPI00153660.4 | Gene_Symbol=Dlat Dihydrolipoyllysine-residue acetyltransferase component of pyruva | 0.7536 | -0.4081 | NA     |
| 228 | 2    | 2    | 13.8 | IPI:IPI00137491.1 | Gene_Symbol=Acp5 Tartrate-resistant acid phosphatase type 5                        | 0.7357 | -0.4429 | NA     |
| 229 | 2    | 2    | 22.7 | IPI:IPI00475031.1 | Gene_Symbol=Prdx5 Adult male tongue cDNA, RIKEN full-length enriched library, clon | 1.0653 | 0.0912  | NA     |
| 230 | 2    | 2    | 3    | IPI:IPI00330523.1 | Gene_Symbol=Pcca Propionyl-CoA carboxylase alpha chain, mitochondrial              | 1.1234 | 0.1679  | NA     |
| 231 | 2    | 2    | 13.9 | IPI:IPI00153373.1 | Gene_Symbol=Cmb1 Carboxymethylenebutenolidase homolog                              | 0.8931 | -0.1632 | NA     |
| 232 | 2    | 2    | 7.9  | IPI:IPI00121550.3 | Gene_Symbol=Atp1b1 Sodium/potassium-transporting ATPase subunit beta-1             | 0.8105 | -0.3032 | NA     |
| 233 | 2    | 2    | 9.8  | IPI:IPI00903355.1 | Gene_Symbol=Rap1a Bone marrow macrophage cDNA, RIKEN full-length enriched lit      | 0.7375 | -0.4394 | NA     |
| 234 | 2    | 2    | 23.5 | IPI:IPI00886222.1 | Gene_Symbol=Ndufs6 11 kDa protein                                                  | 1.0714 | 0.0995  | NA     |
| 235 | 2    | 2    | 17.5 | IPI:IPI00885860.1 | Gene_Symbol=Apoc3 15 kDa protein                                                   | 0.9397 | -0.0897 | NA     |
| 236 | 2    | 2    | 7.5  | IPI:IPI00875416.1 | Gene_Symbol=Sord 40 kDa protein                                                    | 0.9278 | -0.1082 | NA     |
| 237 | 2    | 2    | 19.3 | IPI:IPI00850964.1 | Gene_Symbol=LOC100046223 similar to insulinoma protein (rig) isoform 1             | 0.8622 | -0.2140 | NA     |
| 238 | 2    | 2    | 36.8 | IPI:IPI00667117.2 | Gene_Symbol=Dbi Acyl-CoA-binding protein                                           | 0.4849 | -1.0444 | NA     |
| 239 | 2    | 2    | 3.2  | IPI:IPI00652358.5 | Gene_Symbol=Arsb Isoform 1 of Arylsulfatase B                                      | 1.2365 | 0.3063  | NA     |
| 240 | 2    | 2    | 16.8 | IPI:IPI00344004.3 | Gene_Symbol=Ndufa12 NADH dehydrogenase (Ubiquinone) 1 alpha subcomplex, 12         | 0.8561 | -0.2242 | NA     |

|     |   |   |                                                                                     |        |         |    |
|-----|---|---|-------------------------------------------------------------------------------------|--------|---------|----|
| 241 | 2 | 2 | 16.4 IPI:IPI00315794.1 Gene_Symbol=Cyb5b Cytochrome b5 type B                       | 1.1712 | 0.2280  | NA |
| 242 | 2 | 2 | 5.1 IPI:IPI00274222.2 Gene_Symbol=Acad8 Isobutyryl-CoA dehydrogenase, mitochondrial | 0.8468 | -0.2399 | NA |
