# Supplementary material
Source: PubMed Central journal article supplement (PMC3805328)
Supplement: pr400219s_si_003.pdf [file pr400219s_si_003.pdf]

### Supplementary Table 3. Summary of mitochondrial proteins and their fold change detected by MS with troglitazone administration

Individual protein fold change ratio relative to the control vehicle, as detected by 8-plex iTRAQ.

IPA-qualified functions associated with troglitazone-induced toxicity based on directional changes to protein expression are also included.

This table comprises of two tabs:

- |                   |                                                                                                                        |
|-------------------|------------------------------------------------------------------------------------------------------------------------|
| <b>A) 14 days</b> | Summary of protein fold change using iTRAQ channels 113 to 116 after 14 days of troglitazone administration            |
| <b>B) 28 days</b> | Summary of protein fold change using iTRAQ channels 117, 118, 119 and 121 after 28 days of troglitazone administration |

#### Column description (for tabs A and B)

|                         |                                                                                                                                                                     |
|-------------------------|---------------------------------------------------------------------------------------------------------------------------------------------------------------------|
| <b>UNUSED:</b>          | A measure of all the peptide evidence for a protein that is not better explained by a higher ranked protein. Considered as the true indicator of protein confidence |
| <b>TOTAL:</b>           | A measure of all the peptide evidence for a protein                                                                                                                 |
| <b>% COV:</b>           | Percentage of amino acids detected by MS                                                                                                                            |
| <b>ACCESSION:</b>       | IPI protein identifier                                                                                                                                              |
| <b>NAME:</b>            | Protein name                                                                                                                                                        |
| <b>AVG FOLD CHANGE:</b> | Average fold change                                                                                                                                                 |
| <b>LOG<sub>2</sub>:</b> | Log base 2 of average fold change                                                                                                                                   |
| <b>P-VALUE</b>          | Quantification <i>P</i> -value                                                                                                                                      |

\* NA values for proteins identified by 2 peptides which is insufficient for *P*-value calculation



A) 14 days

| NO. | UNUSED | TOTAL  | % COV | ACCESSION         | NAME                                                                                                                                           | AVG FOLD CHANGE | Log <sub>2</sub> | P-VALUE  |
|-----|--------|--------|-------|-------------------|------------------------------------------------------------------------------------------------------------------------------------------------|-----------------|------------------|----------|
| 1   | 183.93 | 183.93 | 64.4  | IPI:IPI00111908.8 | Gene_Symbol=Cps1 Carbamoyl-phosphate synthase [ammonia], mitochondrial                                                                         | 0.91955         | -0.121           | 0.003625 |
| 2   | 53.16  | 53.17  | 43.5  | IPI:IPI00114710.2 | Gene_Symbol=Pcx Activated spleen cDNA, RIKEN full-length enriched library, clone:F830201B12 product:pyruvate carboxylase, full insert sequence | 1.0633          | 0.088549         | 0.0147   |
| 3   | 50.83  | 50.83  | 51.6  | IPI:IPI00114209.1 | Gene_Symbol=Glud1 Glutamate dehydrogenase 1, mitochondrial                                                                                     | 0.9862          | -0.02005         | 0.1455   |
| 4   | 49.94  | 49.94  | 65.5  | IPI:IPI00869393.1 | Gene_Symbol=Cat catalase                                                                                                                       | 1.672175        | 0.741726         | 0        |
| 5   | 48.03  | 48.03  | 56.8  | IPI:IPI00461964.3 | Gene_Symbol=Aldh6a1 Methylmalonate-semialdehyde dehydrogenase [acylating], mitochondrial                                                       | 0.91505         | -0.12808         | 0.1867   |
| 6   | 47.61  | 47.61  | 51.7  | IPI:IPI00880839.1 | Gene_Symbol=Hspa9 heat shock protein 9                                                                                                         | 0.9625          | -0.05514         | 0.0555   |
| 7   | 46.26  | 46.26  | 49    | IPI:IPI00554834.2 | Gene_Symbol=Ehhadh Peroxisomal bifunctional enzyme                                                                                             | 1.551525        | 0.633687         | 0.00005  |
| 8   | 46.18  | 46.18  | 45.9  | IPI:IPI00111218.1 | Gene_Symbol=Aldh2 Aldehyde dehydrogenase, mitochondrial                                                                                        | 1.018825        | 0.026906         | 0.3416   |
| 9   | 45.37  | 45.37  | 47.3  | IPI:IPI00223092.5 | Gene_Symbol=Hadha Trifunctional enzyme subunit alpha, mitochondrial                                                                            | 1.048425        | 0.068224         | 0.2421   |
| 10  | 43.42  | 43.42  | 39    | IPI:IPI00120123.1 | Gene_Symbol=Dmgdh Dimethylglycine dehydrogenase, mitochondrial                                                                                 | 0.852775        | -0.22976         | 0.003    |

|    |       |       |      |                   |                                                                                                                    |          |          |          |
|----|-------|-------|------|-------------------|--------------------------------------------------------------------------------------------------------------------|----------|----------|----------|
| 11 | 43.03 | 43.03 | 52.2 | IPI:IPI00420718.4 | Gene_Symbol=Hmgcs2 Hydroxymethylglutaryl-CoA synthase, mitochondrial                                               | 1.06925  | 0.096599 | 0.0455   |
| 12 | 41.56 | 41.56 | 64.1 | IPI:IPI00468481.2 | Gene_Symbol=Atp5b ATP synthase subunit beta, mitochondrial                                                         | 0.9418   | -0.08651 | 0.1163   |
| 13 | 40.72 | 40.72 | 56.7 | IPI:IPI00117312.1 | Gene_Symbol=Got2 Aspartate aminotransferase, mitochondrial                                                         | 0.964    | -0.05289 | 0.4159   |
| 14 | 39.24 | 39.24 | 63.3 | IPI:IPI00129178.1 | Gene_Symbol=Oat Ornithine aminotransferase, mitochondrial                                                          | 1.14835  | 0.199562 | 0.06665  |
| 15 | 38.89 | 38.89 | 56   | IPI:IPI00308885.6 | Gene_Symbol=Hspd1 Isoform 1 of 60 kDa heat shock protein, mitochondrial                                            | 0.8668   | -0.20623 | 0.0104   |
| 16 | 36.49 | 36.49 | 49.9 | IPI:IPI00130280.1 | Gene_Symbol=Atp5a1 ATP synthase subunit alpha, mitochondrial                                                       | 0.9611   | -0.05724 | 0.2422   |
| 17 | 35.03 | 35.03 | 61.5 | IPI:IPI00653158.1 | Gene_Symbol=Acaa2 Acetyl-Coenzyme A acyltransferase 2 (Mitochondrial 3-oxoacyl-Coenzyme A thiolase), isoform CRA_k | 0.97285  | -0.03971 | 0.3177   |
| 18 | 34.83 | 34.83 | 59.1 | IPI:IPI00223367.5 | Gene_Symbol=Uox Uricase                                                                                            | 1.62545  | 0.700839 | 0        |
| 19 | 34.1  | 34.1  | 43.9 | IPI:IPI00828479.1 | Gene_Symbol=Acox1 Acyl-Coenzyme A oxidase 1, palmitoyl                                                             | 2.051475 | 1.036662 | 0.000025 |
| 20 | 33    | 33    | 40.9 | IPI:IPI00119203.4 | Gene_Symbol=Acadvl Very long-chain specific acyl-CoA dehydrogenase, mitochondrial                                  | 1.05895  | 0.082634 | 0.00565  |
| 21 | 32.28 | 32.28 | 40.8 | IPI:IPI00875638.1 | Gene_Symbol=Immt Isoform 3 of Mitochondrial inner membrane protein                                                 | 0.840025 | -0.2515  | 0.0653   |
| 22 | 31.96 | 31.97 | 50.1 | IPI:IPI00459487.3 | Gene_Symbol=Suclg2 Isoform 1 of Succinyl-CoA ligase [GDP-forming] subunit beta, mitochondrial                      | 1.032925 | 0.046736 | 0.17775  |

|    |       |       |      |                   |                                                                                           |          |          |          |
|----|-------|-------|------|-------------------|-------------------------------------------------------------------------------------------|----------|----------|----------|
| 23 | 31.15 | 31.16 | 56.8 | IPI:IPI00154054.1 | Gene_Symbol=Acat1 Acetyl-CoA acetyltransferase, mitochondrial                             | 0.967075 | -0.0483  | 0.17605  |
| 24 | 30.62 | 30.62 | 35.4 | IPI:IPI00115607.3 | Gene_Symbol=Hadhb Trifunctional enzyme subunit beta, mitochondrial                        | 1.044575 | 0.062916 | 0.1358   |
| 25 | 29.71 | 29.71 | 40.3 | IPI:IPI00121322.2 | Gene_Symbol=Etfdh Electron transfer flavoprotein-ubiquinone oxidoreductase, mitochondrial | 1.02675  | 0.038085 | 0.2294   |
| 26 | 29.63 | 29.63 | 25.7 | IPI:IPI00387491.1 | Gene_Symbol=Aass Alpha-aminoadipic semialdehyde synthase, mitochondrial                   | 0.980625 | -0.02823 | 0.5859   |
| 27 | 29.36 | 29.36 | 33.9 | IPI:IPI00261627.1 | Gene_Symbol=Sucla2 Succinyl-CoA ligase [ADP-forming] subunit beta, mitochondrial          | 0.922775 | -0.11595 | 0.04825  |
| 28 | 28.47 | 28.47 | 38.5 | IPI:IPI00116074.1 | Gene_Symbol=Aco2 Aconitate hydratase, mitochondrial                                       | 0.9813   | -0.02723 | 0.3817   |
| 29 | 28.24 | 28.24 | 24.9 | IPI:IPI00134131.2 | Gene_Symbol=Scp2 Isoform SCPx of Non-specific lipid-transfer protein                      | 1.403275 | 0.488798 | 0.002425 |
| 30 | 28.08 | 28.08 | 33.7 | IPI:IPI00331628.5 | Gene_Symbol=Hsd17b4 Peroxisomal multifunctional enzyme type 2                             | 1.411575 | 0.497306 | 0.00045  |
| 31 | 27.76 | 27.76 | 33.9 | IPI:IPI00136213.5 | Gene_Symbol=Sardh Sarcosine dehydrogenase, mitochondrial                                  | 0.95265  | -0.06998 | 0.0602   |
| 32 | 27.2  | 27.39 | 40.9 | IPI:IPI00894588.1 | Gene_Symbol=Acadl Long-chain specific acyl-CoA dehydrogenase, mitochondrial               | 1.06025  | 0.084404 | 0.149    |
| 33 | 26.25 | 26.25 | 33.3 | IPI:IPI00122633.3 | Gene_Symbol=Acsf2 Acyl-CoA synthetase family member 2, mitochondrial                      | 1.0252   | 0.035905 | 0.2696   |
| 34 | 26.15 | 26.15 | 38.7 | IPI:IPI00776257.1 | Gene_Symbol=Otc Otc protein                                                               | 0.9645   | -0.05215 | 0.1359   |

|    |       |       |      |                   |                                                                                                    |          |          |          |
|----|-------|-------|------|-------------------|----------------------------------------------------------------------------------------------------|----------|----------|----------|
| 35 | 25.34 | 25.36 | 48.2 | IPI:IPI00323592.2 | Gene_Symbol=Mdh2 Malate dehydrogenase, mitochondrial                                               | 0.971225 | -0.04212 | 0.3869   |
| 36 | 25.18 | 25.18 | 46.6 | IPI:IPI00119138.1 | Gene_Symbol=Uqcrc2 Cytochrome b-c1 complex subunit 2, mitochondrial                                | 0.9862   | -0.02005 | 0.5257   |
| 37 | 24.48 | 24.48 | 29.2 | IPI:IPI00857226.1 | Gene_Symbol=Acs11 78 kDa protein                                                                   | 1.2055   | 0.269632 | 0.00315  |
| 38 | 23.43 | 23.43 | 75.3 | IPI:IPI00221769.5 | Gene_Symbol=Ak3 GTP:AMP phosphotransferase mitochondrial                                           | 0.91055  | -0.13519 | 0.0058   |
| 39 | 23.13 | 23.13 | 37.5 | IPI:IPI00405699.2 | Gene_Symbol=Aldh4a1 Delta-1-pyrroline-5-carboxylate dehydrogenase, mitochondrial                   | 0.983975 | -0.02331 | 0.44755  |
| 40 | 22.18 | 22.18 | 43.4 | IPI:IPI00331251.1 | Gene_Symbol=Acads Acyl-Coenzyme A dehydrogenase, short chain, isoform CRA_a                        | 0.965325 | -0.05091 | 0.25335  |
| 41 | 20.92 | 21    | 26.3 | IPI:IPI00553576.3 | Gene_Symbol=Abcd3 ATP-binding cassette, sub-family D, member 3                                     | 1.72165  | 0.783792 | 0.00095  |
| 42 | 20.57 | 20.57 | 41.9 | IPI:IPI00127841.3 | Gene_Symbol=Slc25a5 ADP/ATP translocase 2                                                          | 1.3849   | 0.469782 | 0.0173   |
| 43 | 20.5  | 20.5  | 50.8 | IPI:IPI00223216.5 | Gene_Symbol=Tst Thiosulfate sulfurtransferase                                                      | 1.014475 | 0.020733 | 0.33105  |
| 44 | 20.33 | 20.33 | 30.1 | IPI:IPI00133522.1 | Gene_Symbol=P4hb Protein disulfide-isomerase                                                       | 1.150175 | 0.201853 | 0.01485  |
| 45 | 20    | 20    | 23.9 | IPI:IPI00129928.2 | Gene_Symbol=Fh1 Isoform Mitochondrial of Fumarate hydratase, mitochondrial                         | 0.970675 | -0.04294 | 0.2004   |
| 46 | 19.9  | 19.91 | 47.9 | IPI:IPI00454049.4 | Gene_Symbol=Echs1 Enoyl-CoA hydratase, mitochondrial                                               | 0.922075 | -0.11704 | 0.244    |
| 47 | 19.76 | 19.77 | 54.3 | IPI:IPI00848492.1 | Gene_Symbol=LOC100045699 similar to Electron transferring flavoprotein, beta polypeptide isoform 2 | 0.918025 | -0.12339 | 0.027067 |

|    |       |       |      |                   |                                                                                                                                              |          |          |          |
|----|-------|-------|------|-------------------|----------------------------------------------------------------------------------------------------------------------------------------------|----------|----------|----------|
| 48 | 19.55 | 19.55 | 38   | IPI:IPI00134961.1 | Gene_Symbol=Acadm Medium-chain specific acyl-CoA dehydrogenase, mitochondrial                                                                | 0.965375 | -0.05084 | 0.4371   |
| 49 | 19.08 | 19.1  | 54   | IPI:IPI00648318.1 | Gene_Symbol=Ak2 Adult male liver tumor cDNA, RIKEN full-length enriched library, clone:C730019E03 product:ADENYLATE KINASE 2 homolog         | 0.876425 | -0.1903  | 0.02365  |
| 50 | 19.08 | 19.08 | 45.2 | IPI:IPI00154047.1 | Gene_Symbol=Hibch 3-hydroxyisobutyryl-CoA hydrolase, mitochondrial                                                                           | 0.9482   | -0.07674 | 0.0445   |
| 51 | 19.06 | 19.07 | 36   | IPI:IPI00121105.2 | Gene_Symbol=Hadh Hydroxyacyl-coenzyme A dehydrogenase, mitochondrial                                                                         | 0.9911   | -0.0129  | 0.47315  |
| 52 | 18.6  | 18.6  | 53.8 | IPI:IPI00116753.4 | Gene_Symbol=Etfa Electron transfer flavoprotein subunit alpha, mitochondrial                                                                 | 0.9453   | -0.08116 | 0.125    |
| 53 | 18.45 | 18.45 | 29.7 | IPI:IPI00135651.1 | Gene_Symbol=Slc25a13 Calcium-binding mitochondrial carrier protein Aralar2                                                                   | 1.225675 | 0.293576 | 0.032467 |
| 54 | 18.42 | 18.42 | 32.5 | IPI:IPI00471246.2 | Gene_Symbol=lvd Isovaleryl-CoA dehydrogenase, mitochondrial                                                                                  | 0.959925 | -0.05901 | 0.183    |
| 55 | 18.29 | 18.29 | 28.5 | IPI:IPI00881091.1 | Gene_Symbol=Ctsd Bone marrow macrophage cDNA, RIKEN full-length enriched library, clone:l830005110 product:cathepsin D, full insert sequence | 1.463225 | 0.549152 | 0.000725 |
| 56 | 17.66 | 17.66 | 45.6 | IPI:IPI00129056.2 | Gene_Symbol=Glyat Isoform 1 of Glycine N-acyltransferase                                                                                     | 1.08585  | 0.118825 | 0.0101   |
| 57 | 17.56 | 17.56 | 24.2 | IPI:IPI00226140.5 | Gene_Symbol=Maob Amine oxidase [flavin-containing] B                                                                                         | 1.139125 | 0.187926 | 0.031567 |

|    |       |       |      |                   |                                                                                                                                                      |          |          |         |
|----|-------|-------|------|-------------------|------------------------------------------------------------------------------------------------------------------------------------------------------|----------|----------|---------|
| 58 | 17.35 | 17.36 | 22.1 | IPI:IPI00308882.4 | Gene_Symbol=Ndufs1 NADH-ubiquinone oxidoreductase 75 kDa subunit, mitochondrial                                                                      | 1.06415  | 0.089702 | 0.0722  |
| 59 | 17.09 | 17.1  | 31.2 | IPI:IPI00230351.1 | Gene_Symbol=Sadha Succinate dehydrogenase [ubiquinone] flavoprotein subunit, mitochondrial                                                           | 0.98835  | -0.01691 | 0.4003  |
| 60 | 16.76 | 16.76 | 25.9 | IPI:IPI00625588.1 | Gene_Symbol=- hypothetical protein (Tu translation elongation factor, mitochondrial)                                                                 | 1.034675 | 0.049178 | 0.1525  |
| 61 | 16.62 | 16.62 | 36.7 | IPI:IPI00130535.1 | Gene_Symbol=Dbt Lipoamide acyltransferase component of branched-chain alpha-keto acid dehydrogenase complex, mitochondrial                           | 0.93305  | -0.09997 | 0.50715 |
| 62 | 16.53 | 16.61 | 28.8 | IPI:IPI00126625.1 | Gene_Symbol=Acsm1 Isoform 1 of Acyl-coenzyme A synthetase ACSM1, mitochondrial                                                                       | 1.062425 | 0.087361 | 0.1822  |
| 63 | 16.23 | 16.23 | 47.4 | IPI:IPI00133440.1 | Gene_Symbol=Phb Prohibitin                                                                                                                           | 0.964875 | -0.05159 | 0.45405 |
| 64 | 16.12 | 16.14 | 33.8 | IPI:IPI00468653.3 | Gene_Symbol=Pccb Propionyl Coenzyme A carboxylase, beta polypeptide                                                                                  | 0.9507   | -0.07294 | 0.17235 |
| 65 | 16.11 | 16.11 | 24.9 | IPI:IPI00330523.1 | Gene_Symbol=Pcca Propionyl-CoA carboxylase alpha chain, mitochondrial                                                                                | 0.94055  | -0.08842 | 0.0229  |
| 66 | 15.86 | 15.86 | 45.8 | IPI:IPI00320462.4 | Gene_Symbol=Bphl Putative uncharacterized protein                                                                                                    | 0.9445   | -0.08238 | 0.1841  |
| 67 | 15.78 | 15.85 | 29.9 | IPI:IPI00881401.1 | Gene_Symbol=Cpt2 carnitine palmitoyltransferase 2                                                                                                    | 1.10465  | 0.143589 | 0.1562  |
| 68 | 15.7  | 15.71 | 17.9 | IPI:IPI00850737.1 | Gene_Symbol=Mut TIB-55 BB88 cDNA, RIKEN full-length enriched library, clone:l730049G19 product:methylmalonyl-Coenzyme A mutase, full insert sequence | 1.236375 | 0.306116 | 0.13825 |



|    |       |       |      |                   |                                                                                                            |          |          |         |
|----|-------|-------|------|-------------------|------------------------------------------------------------------------------------------------------------|----------|----------|---------|
| 69 | 15.68 | 15.69 | 35.8 | IPI:IPI00387379.1 | Gene_Symbol=Decr1 2,4-dienoyl-CoA reductase, mitochondrial                                                 | 1.00055  | 0.000793 | 0.0232  |
| 70 | 15.46 | 15.46 | 62.5 | IPI:IPI00623553.1 | Gene_Symbol=Atp5h (BLAST score: 326, P = 4e-88)<br>LOC100044492;ENSMUSG00000068706<br>hypothetical protein | 1.068125 | 0.09508  | 0.3109  |
| 71 | 15.22 | 15.22 | 24.6 | IPI:IPI00113141.1 | Gene_Symbol=Cs Citrate synthase, mitochondrial                                                             | 0.95695  | -0.06348 | 0.4751  |
| 72 | 15.08 | 15.08 | 30.9 | IPI:IPI00322760.7 | Gene_Symbol=Prodh proline dehydrogenase                                                                    | 1.009375 | 0.013462 | 0.465   |
| 73 | 14.93 | 14.93 | 44.1 | IPI:IPI00321718.4 | Gene_Symbol=Phb2 Prohibitin-2                                                                              | 1.010075 | 0.014462 | 0.63375 |
| 74 | 14.83 | 14.83 | 30.4 | IPI:IPI00230540.1 | Gene_Symbol=Vdac1 Isoform Mt-VDAC1 of Voltage-dependent anion-selective channel protein 1                  | 1.067625 | 0.094405 | 0.2002  |
| 75 | 14.73 | 14.73 | 20.3 | IPI:IPI00316314.1 | Gene_Symbol=Hac1 2-hydroxyacyl-CoA lyase 1                                                                 | 1.6912   | 0.758047 | 0.1458  |
| 76 | 14.68 | 14.68 | 32.8 | IPI:IPI00341282.2 | Gene_Symbol=Atp5f1 ATP synthase subunit b, mitochondrial                                                   | 1.11995  | 0.163434 | 0.1057  |
| 77 | 14.57 | 14.57 | 52.7 | IPI:IPI00117978.1 | Gene_Symbol=Cox4i1 Cytochrome c oxidase subunit 4 isoform 1, mitochondrial                                 | 0.992475 | -0.0109  | 0.45525 |
| 78 | 14.55 | 14.56 | 40.5 | IPI:IPI00331692.1 | Gene_Symbol=Dci Putative uncharacterized protein                                                           | 1.044025 | 0.062156 | 0.1146  |
| 79 | 14.55 | 14.55 | 51.6 | IPI:IPI00118986.1 | Gene_Symbol=Atp5o;LOC100047429 ATP synthase subunit O, mitochondrial                                       | 1.008325 | 0.011961 | 0.85075 |
| 80 | 14.49 | 14.53 | 76.2 | IPI:IPI00222419.5 | Gene_Symbol=ENSMUSG00000058927;Cycc<br>Cytochrome c, somatic                                               | 0.904875 | -0.14421 | 0.1161  |
| 81 | 14.36 | 14.36 | 86.3 | IPI:IPI00263863.8 | Gene_Symbol=Hspe1 10 kDa heat shock protein, mitochondrial                                                 | 0.86505  | -0.20914 | 0.0307  |

|    |       |       |      |                   |                                                                                                                      |          |          |          |
|----|-------|-------|------|-------------------|----------------------------------------------------------------------------------------------------------------------|----------|----------|----------|
| 82 | 14.26 | 14.26 | 27   | IPI:IPI00132042.1 | Gene_Symbol=Pdhb Pyruvate dehydrogenase E1 component subunit beta, mitochondrial                                     | 1.019725 | 0.02818  | 0.6924   |
| 83 | 14.13 | 14.13 | 17.7 | IPI:IPI00330747.2 | Gene_Symbol=Nphp3;Acad11 Acyl-CoA dehydrogenase family member 11                                                     | 2.056875 | 1.040454 | 0.03195  |
| 84 | 14.01 | 14.01 | 24.1 | IPI:IPI00116192.1 | Gene_Symbol=Prdx3 Thioredoxin-dependent peroxide reductase, mitochondrial                                            | 1.0291   | 0.041383 | 0.2549   |
| 85 | 13.97 | 13.97 | 26.5 | IPI:IPI00230084.5 | Gene_Symbol=Aldh7a1 aldehyde dehydrogenase family 7, member A1 isoform a                                             | 1.044725 | 0.063123 | 0.4108   |
| 86 | 13.75 | 13.75 | 28.1 | IPI:IPI00230108.6 | Gene_Symbol=Pdia3 Protein disulfide-isomerase A3                                                                     | 1.1568   | 0.210139 | 0.04605  |
| 87 | 13.7  | 13.7  | 20.6 | IPI:IPI00874456.1 | Gene_Symbol=Dld Dihydrolipoyl dehydrogenase, mitochondrial                                                           | 0.903525 | -0.14636 | 0.0484   |
| 88 | 13.32 | 13.32 | 20.2 | IPI:IPI00130804.1 | Gene_Symbol=Ech1 Delta(3,5)-Delta(2,4)-dienoyl-CoA isomerase, mitochondrial                                          | 0.9423   | -0.08574 | 0.0997   |
| 89 | 13.12 | 13.47 | 28.8 | IPI:IPI00788331.1 | Gene_Symbol=Gcdh glutaryl-Coenzyme A dehydrogenase                                                                   | 1.104475 | 0.143361 | 0.04245  |
| 90 | 13.1  | 13.1  | 26.5 | IPI:IPI00379694.4 | Gene_Symbol=Hmgcl 3-hydroxy-3-methylglutaryl-Coenzyme A lyase                                                        | 0.937325 | -0.09338 | 0.2279   |
| 91 | 13.08 | 13.08 | 30.7 | IPI:IPI00321617.1 | Gene_Symbol=Ephx2 Isoform 1 of Epoxide hydrolase 2                                                                   | 1.588725 | 0.667869 | 0.002825 |
| 92 | 13.05 | 13.05 | 58.6 | IPI:IPI00785410.1 | Gene_Symbol=Cox5b Cytochrome c oxidase subunit 5B, mitochondrial                                                     | 0.8478   | -0.2382  | 0.017833 |
| 93 | 12.97 | 13.37 | 15.1 | IPI:IPI00850133.1 | Gene_Symbol=Kiaa0564 (BLAST score:3792, P = 0.0) 1300010F03Rik Isoform 1 of Uncharacterized protein KIAA0564 homolog | 1.17035  | 0.22694  | 0.1358   |

|     |       |       |      |                   |                                                                                                                                                |          |          |         |
|-----|-------|-------|------|-------------------|------------------------------------------------------------------------------------------------------------------------------------------------|----------|----------|---------|
| 94  | 12.9  | 12.9  | 28.6 | IPI:IPI00454008.1 | Gene_Symbol=Shmt2 Serine hydroxymethyltransferase                                                                                              | 0.979175 | -0.03036 | 0.1964  |
| 95  | 12.82 | 12.82 | 25.1 | IPI:IPI00134809.2 | Gene_Symbol=Dlst Isoform 1 of Dihydrolipoyllysine-residue succinyltransferase component of 2-oxoglutarate dehydrogenase complex, mitochondrial | 0.907525 | -0.13999 | 0.1808  |
| 96  | 12.52 | 12.52 | 21.4 | IPI:IPI00776047.1 | Gene_Symbol=Aifm1 Apoptosis-inducing factor, mitochondrion-associated 1                                                                        | 1.05125  | 0.072106 | 0.17465 |
| 97  | 12.51 | 12.66 | 25.3 | IPI:IPI00119685.1 | Gene_Symbol=Cyp27a1 Cytochrome P450 27, mitochondrial                                                                                          | 1.05775  | 0.080999 | 0.0267  |
| 98  | 12.48 | 12.48 | 41.7 | IPI:IPI00890322.1 | Gene_Symbol=Bdh1 3-hydroxybutyrate dehydrogenase, type 1                                                                                       | 1.0805   | 0.111699 | 0.0114  |
| 99  | 12.33 | 14.73 | 45.6 | IPI:IPI00624210.3 | Gene_Symbol=Glyal (BLAST score 619, P = 1e-176) EG240549 Glycine N-acyltransferase-like protein                                                | 1.0523   | 0.073546 | 0.0965  |
| 100 | 12.33 | 12.35 | 37.2 | IPI:IPI00338536.1 | Gene_Symbol=Sdhb Succinate dehydrogenase [ubiquinone] iron-sulfur subunit, mitochondrial                                                       | 0.948025 | -0.077   | 0.2533  |
| 101 | 12.21 | 12.21 | 41.6 | IPI:IPI00121051.3 | Gene_Symbol=Gstk1 Glutathione S-transferase kappa 1                                                                                            | 1.047025 | 0.066296 | 0.0033  |
| 102 | 12.19 | 12.19 | 27.2 | IPI:IPI00273146.1 | Gene_Symbol=Chdh Choline dehydrogenase, mitochondrial                                                                                          | 1.09475  | 0.130601 | 0.25325 |
| 103 | 12.02 | 12.02 | 36   | IPI:IPI00875110.1 | Gene_Symbol=Idh2 52 kDa protein                                                                                                                | 1.212625 | 0.278133 | 0.03605 |
| 104 | 12.02 | 12.02 | 36.4 | IPI:IPI00776084.1 | Gene_Symbol=Atp5c1 ATP synthase gamma chain                                                                                                    | 1.099525 | 0.13688  | 0.0347  |
| 105 | 11.74 | 11.75 | 43.2 | IPI:IPI00109109.1 | Gene_Symbol=Sod2 Superoxide dismutase [Mn], mitochondrial                                                                                      | 0.95715  | -0.06318 | 0.1666  |
| 106 | 11.46 | 11.46 | 35.6 | IPI:IPI00115824.1 | Gene_Symbol=Nipsnap1 Protein NipSnap homolog 1                                                                                                 | 1.062925 | 0.08804  | 0.42145 |

|     |       |       |      |                   |                                                                                                                           |          |          |         |
|-----|-------|-------|------|-------------------|---------------------------------------------------------------------------------------------------------------------------|----------|----------|---------|
| 107 | 11.46 | 11.46 | 64.9 | IPI:IPI00555000.2 | Gene_Symbol=Uqcrb Cytochrome b-c1 complex subunit 7                                                                       | 0.9642   | -0.0526  | 0.0631  |
| 108 | 11.22 | 11.22 | 22.4 | IPI:IPI00122547.1 | Gene_Symbol=Vdac2 Voltage-dependent anion-selective channel protein 2                                                     | 1.1467   | 0.197488 | 0.0912  |
| 109 | 11.15 | 11.15 | 27.3 | IPI:IPI00319992.1 | Gene_Symbol=Hspa5 78 kDa glucose-regulated protein                                                                        | 1.045375 | 0.064021 | 0.1679  |
| 110 | 11.1  | 11.11 | 16.1 | IPI:IPI00131695.3 | Gene_Symbol=Alb Serum albumin                                                                                             | 1.197275 | 0.259755 | 0.0488  |
| 111 | 11.02 | 11.11 | 18.3 | IPI:IPI00123276.1 | Gene_Symbol=Mosc2 MOSC domain-containing protein 2, mitochondrial                                                         | 1.59825  | 0.676493 | 0.0095  |
| 112 | 10.98 | 10.98 | 54.6 | IPI:IPI00125460.1 | Gene_Symbol=Atp5j;LOC674583 ATP synthase-coupling factor 6, mitochondrial                                                 | 0.7256   | -0.46275 | 0.0254  |
| 113 | 10.88 | 10.88 | 23.8 | IPI:IPI00653598.2 | Gene_Symbol=Uqcrc1 ubiquinol-cytochrome c reductase core protein 1                                                        | 1.03475  | 0.049282 | 0.0255  |
| 114 | 10.77 | 10.77 | 55.2 | IPI:IPI00230113.5 | Gene_Symbol=Cyb5 Cytochrome b5                                                                                            | 1.0503   | 0.070801 | 0.3715  |
| 115 | 10.64 | 10.64 | 19.3 | IPI:IPI00387289.3 | Gene_Symbol=Ces3 Carboxylesterase 3                                                                                       | 1.145675 | 0.196198 | 0.2859  |
| 116 | 10.19 | 10.19 | 27.1 | IPI:IPI00113517.1 | Gene_Symbol=Ctsb Cathepsin B                                                                                              | 1.27465  | 0.350101 | 0.0238  |
| 117 | 10.17 | 10.17 | 27.6 | IPI:IPI00153660.4 | Gene_Symbol=Dlat Dihydrolipoyllysine-residue acetyltransferase component of pyruvate dehydrogenase complex, mitochondrial | 0.975325 | -0.03605 | 0.15145 |
| 118 | 10.12 | 10.13 | 17.5 | IPI:IPI00134870.3 | Gene_Symbol=Acox2 Peroxisomal acyl-coenzyme A oxidase 2                                                                   | 1.854675 | 0.891166 | 0.1107  |
| 119 | 10.09 | 10.09 | 20.9 | IPI:IPI00742309.1 | Gene_Symbol=Kmo Isoform 2 of Kynurenine 3-monooxygenase                                                                   | 1.210525 | 0.275633 | 0.0227  |
| 120 | 10.01 | 12.03 | 21.9 | IPI:IPI00874350.1 | Gene_Symbol=Aldh3a2 Putative uncharacterized protein                                                                      | 1.37775  | 0.462314 | 0.03035 |

|     |      |      |      |                   |                                                                                                      |          |          |         |
|-----|------|------|------|-------------------|------------------------------------------------------------------------------------------------------|----------|----------|---------|
| 121 | 10   | 10   | 42.9 | IPI:IPI00754739.1 | Gene_Symbol=Chchd3 (BLAST score: 332, P= 5e-90) LOC100046321;Chchd3 Putative uncharacterized protein | 0.839975 | -0.25158 | 0.0391  |
| 122 | 10   | 10   | 24.9 | IPI:IPI00169862.1 | Gene_Symbol=Coq9 Ubiquinone biosynthesis protein COQ9, mitochondrial                                 | 0.8244   | -0.27858 | 0.0479  |
| 123 | 9.9  | 9.9  | 23.3 | IPI:IPI00318750.4 | Gene_Symbol=Dhrs4 NADPH-dependent retinol dehydrogenase/reductase isoform 1                          | 1.155675 | 0.208736 | NA      |
| 124 | 9.7  | 9.7  | 19.3 | IPI:IPI00314202.5 | Gene_Symbol=Baat Bile acid-CoA:amino acid N-acyltransferase                                          | 1.68255  | 0.750649 | NA      |
| 125 | 9.52 | 9.53 | 22.5 | IPI:IPI00884472.1 | Gene_Symbol=Ctsh cathepsin H preproprotein                                                           | 1.260025 | 0.333452 | 0.0629  |
| 126 | 9.51 | 9.51 | 21.3 | IPI:IPI00130460.1 | Gene_Symbol=Ndufv1 NADH dehydrogenase [ubiquinone] flavoprotein 1, mitochondrial                     | 1.0448   | 0.063227 | 0.7192  |
| 127 | 9.4  | 9.41 | 60.5 | IPI:IPI00131771.3 | Gene_Symbol=Cox6c Cytochrome c oxidase polypeptide VIc                                               | 1.01925  | 0.027508 | NA      |
| 128 | 9.34 | 9.34 | 37.2 | IPI:IPI00785323.1 | Gene_Symbol=Cyp2e1 Cytochrome P450 2E1                                                               | 1.386075 | 0.471005 | 0.0643  |
| 129 | 9.32 | 9.32 | 23.3 | IPI:IPI00331555.2 | Gene_Symbol=Bckdha branched chain ketoacid dehydrogenase E1, alpha polypeptide                       | 0.973375 | -0.03893 | 0.0644  |
| 130 | 9.31 | 9.31 | 41.7 | IPI:IPI00133034.3 | Gene_Symbol=Hint2 Histidine triad nucleotide-binding protein 2                                       | 0.907975 | -0.13928 | 0.24275 |
| 131 | 9.23 | 9.23 | 35.3 | IPI:IPI00133006.1 | Gene_Symbol=Ndufab1 Acyl carrier protein, mitochondrial                                              | 1.14715  | 0.198054 | 0.129   |
| 132 | 9.14 | 9.14 | 70.9 | IPI:IPI00225390.5 | Gene_Symbol=Cox6b1 Cytochrome c oxidase subunit VIb isoform 1                                        | 0.809025 | -0.30574 | NA      |
| 133 | 8.91 | 8.91 | 26.1 | IPI:IPI00874482.1 | Gene_Symbol=Actg1 Actin, cytoplasmic 2                                                               | 1.3297   | 0.411101 | 0.00365 |

|     |      |      |      |                   |                                                                                                           |          |          |          |
|-----|------|------|------|-------------------|-----------------------------------------------------------------------------------------------------------|----------|----------|----------|
| 134 | 8.78 | 8.78 | 31.8 | IPI:IPI00319652.2 | Gene_Symbol=Gpx1 Glutathione peroxidase 1                                                                 | 0.851    | -0.23277 | 0.0463   |
| 135 | 8.76 | 8.76 | 22.6 | IPI:IPI00134691.3 | Gene_Symbol=Ugt1a2;Ugt1a9;Ugt1a10;Ugt1a1;Ugt1a5;Ugt1a7c;LOC632297;Ugt1a6b UDP-glucuronosyltransferase 1-1 | 0.8771   | -0.18919 | NA       |
| 136 | 8.72 | 8.72 | 33.7 | IPI:IPI00830581.1 | Gene_Symbol=Hsd17b10 hydroxyacyl-Coenzyme A dehydrogenase type II                                         | 1.10775  | 0.147632 | 0.32685  |
| 137 | 8.62 | 9.06 | 16   | IPI:IPI00128738.4 | Gene_Symbol=Agxt2 Alanine--glyoxylate aminotransferase 2, mitochondrial                                   | 1.0282   | 0.040121 | 0.075    |
| 138 | 8.41 | 11.2 | 32.6 | IPI:IPI00113073.3 | Gene_Symbol=Aldh1b1 Aldehyde dehydrogenase X, mitochondrial                                               | 0.854725 | -0.22647 | NA       |
| 139 | 8.35 | 8.42 | 10.6 | IPI:IPI00761408.2 | Gene_Symbol=Lonp1 Lon protease homolog, mitochondrial                                                     | 1.132775 | 0.179861 | 0.0161   |
| 140 | 8.29 | 8.29 | 29.5 | IPI:IPI00117083.1 | Gene_Symbol=Grpel1 GrpE protein homolog 1, mitochondrial                                                  | 0.980775 | -0.02801 | NA       |
| 141 | 8.27 | 8.52 | 27.4 | IPI:IPI00407499.1 | Gene_Symbol=Abat Isoform 1 of 4-aminobutyrate aminotransferase, mitochondrial                             | 1.170625 | 0.227279 | 0.32575  |
| 142 | 8.22 | 8.38 | 13.5 | IPI:IPI00895390.1 | Gene_Symbol=Scep1 Serine carboxypeptidase 1                                                               | 1.418    | 0.503858 | 0.0073   |
| 143 | 8.16 | 8.54 | 16.8 | IPI:IPI00153144.3 | Gene_Symbol=Suox Sulfite oxidase, mitochondrial                                                           | 0.861525 | -0.21504 | NA       |
| 144 | 8.16 | 8.16 | 29.6 | IPI:IPI00116222.1 | Gene_Symbol=Hibadh 3-hydroxyisobutyrate dehydrogenase, mitochondrial                                      | 0.879    | -0.18606 | 0.023167 |
| 145 | 8.06 | 8.08 | 13.3 | IPI:IPI00759881.1 | Gene_Symbol=Acad9 very-long-chain acyl-CoA dehydrogenase VLCAD homolog                                    | 1.01855  | 0.026517 | 0.8149   |

|     |      |      |      |                   |                                                                                                |          |          |         |
|-----|------|------|------|-------------------|------------------------------------------------------------------------------------------------|----------|----------|---------|
| 146 | 8.01 | 8.01 | 31.8 | IPI:IPI00406442.2 | Gene_Symbol=Suc1g1 Succinyl-CoA ligase [GDP-forming] subunit alpha, mitochondrial              | 1.015875 | 0.022723 | 0.0195  |
| 147 | 8    | 8    | 34.8 | IPI:IPI00896110.1 | Gene_Symbol=Prdx5 Prdx5 protein                                                                | 0.896475 | -0.15766 | 0.17745 |
| 148 | 8    | 8    | 60.2 | IPI:IPI00128346.1 | Gene_Symbol=Cisd1 CDGSH iron sulfur domain-containing protein 1                                | 1.226675 | 0.294753 | 0.0476  |
| 149 | 8    | 8    | 22.8 | IPI:IPI00120212.1 | Gene_Symbol=Ndufa9 NADH dehydrogenase [ubiquinone] 1 alpha subcomplex subunit 9, mitochondrial | 1.138125 | 0.186659 | 0.2204  |
| 150 | 8    | 8    | 17.9 | IPI:IPI00125220.6 | Gene_Symbol=Ctsz Cathepsin Z                                                                   | 1.124975 | 0.169893 | 0.16875 |
| 151 | 7.93 | 7.93 | 21.9 | IPI:IPI00125853.1 | Gene_Symbol=Slc25a15 Mitochondrial ornithine transporter 1                                     | 1.03145  | 0.044674 | 0.77735 |
| 152 | 7.87 | 8    | 13   | IPI:IPI00420706.4 | Gene_Symbol=Lrpprc Leucine-rich PPR motif-containing protein, mitochondrial                    | 1.025875 | 0.036855 | 0.6179  |
| 153 | 7.7  | 7.7  | 46.3 | IPI:IPI00125929.2 | Gene_Symbol=Ndufa4 NADH dehydrogenase [ubiquinone] 1 alpha subcomplex subunit 4                | 0.870725 | -0.19971 | 0.02825 |
| 154 | 7.68 | 7.7  | 21.8 | IPI:IPI00132762.1 | Gene_Symbol=Trap1 Heat shock protein 75 kDa, mitochondrial                                     | 1.0647   | 0.090447 | 0.3885  |
| 155 | 7.26 | 7.26 | 65.5 | IPI:IPI00130322.5 | Gene_Symbol=Ndufa7 NADH dehydrogenase [ubiquinone] 1 alpha subcomplex subunit 7                | 0.969225 | -0.0451  | 0.2927  |
| 156 | 7.19 | 7.21 | 22.8 | IPI:IPI00877214.1 | Gene_Symbol=Peci peroxisomal delta3, delta2-enoyl-Coenzyme A isomerase isoform a               | 1.272075 | 0.347184 | 0.03125 |
| 157 | 7    | 7    | 13.8 | IPI:IPI00130627.1 | Gene_Symbol=Lgmn Legumain                                                                      | 1.045675 | 0.064435 | 0.32585 |

|     |      |      |      |                   |                                                                                                                                                                               |          |          |         |
|-----|------|------|------|-------------------|-------------------------------------------------------------------------------------------------------------------------------------------------------------------------------|----------|----------|---------|
| 158 | 6.93 | 7.53 | 10.4 | IPI:IPI00221556.2 | Gene_Symbol=AcsM5 Isoform 1 of Acyl-coenzyme A synthetase ACSM5, mitochondrial                                                                                                | 1.013925 | 0.019951 | 0.41985 |
| 159 | 6.77 | 6.82 | 23.8 | IPI:IPI00895177.1 | Gene_Symbol=Cyb5r3 13 days embryo liver cDNA, RIKEN full-length enriched library, clone:2500002N19 product:NADH-CYTOCHROME B5 REDUCTASE homolog                               | 1.050375 | 0.070904 | 0.0003  |
| 160 | 6.65 | 6.65 | 19.7 | IPI:IPI00132728.2 | Gene_Symbol=Cyc1 Isoform 1 of Cytochrome c1, heme protein, mitochondrial                                                                                                      | 1.18665  | 0.246894 | 0.09205 |
| 161 | 6.61 | 6.62 | 20.8 | IPI:IPI00116748.1 | Gene_Symbol=Ndufa10 NADH dehydrogenase [ubiquinone] 1 alpha subcomplex subunit 10, mitochondrial                                                                              | 1.16915  | 0.22546  | 0.0688  |
| 162 | 6.57 | 6.57 | 43.2 | IPI:IPI00271986.6 | Gene_Symbol=Atp5j2 ATP synthase subunit f, mitochondrial                                                                                                                      | 0.9555   | -0.06567 | NA      |
| 163 | 6.55 | 6.55 | 9.5  | IPI:IPI00110843.3 | Gene_Symbol=Agmat Agmatinase, mitochondrial                                                                                                                                   | 0.76225  | -0.39166 | NA      |
| 164 | 6.52 | 6.52 | 15.1 | IPI:IPI00850430.1 | Gene_Symbol=Slc25a3 LOC100046151 similar to Solute carrier family 25 (mitochondrial carrier, phosphate carrier), member 3                                                     | 1.083875 | 0.116198 | NA      |
| 165 | 6.42 | 6.42 | 26.7 | IPI:IPI00337893.2 | Gene_Symbol=Pdha1 Pyruvate dehydrogenase E1 component subunit alpha, somatic form, mitochondrial                                                                              | 0.968975 | -0.04547 | 0.0284  |
| 166 | 6.28 | 6.28 | 17   | IPI:IPI00276926.3 | Gene_Symbol=Slc25a1 NOD-derived CD11c +ve dendritic cells cDNA, RIKEN full-length enriched library, clone:F630026H16 product:solute carrier family 25 (mitochondrial carrier) | 1.176575 | 0.234593 | 0.0068  |



|     |      |      |      |                   |                                                                                                              |          |          |          |
|-----|------|------|------|-------------------|--------------------------------------------------------------------------------------------------------------|----------|----------|----------|
| 167 | 6.25 | 6.41 | 7.8  | IPI:IPI00845652.1 | Gene_Symbol=Ogdh Isoform 3 of 2-oxoglutarate dehydrogenase E1 component, mitochondrial                       | 1.001025 | 0.001478 | 0.3259   |
| 168 | 6.25 | 6.25 | 28.1 | IPI:IPI00125325.1 | Gene_Symbol=Decr2 Peroxisomal 2,4-dienoyl-CoA reductase                                                      | 1.644    | 0.71721  | 0.0932   |
| 169 | 6.24 | 6.24 | 48.7 | IPI:IPI00135857.3 | Gene_Symbol=Sod1 (BLAST score 313, P = 3e-84) EG667310;LOC545845 hypothetical protein isoform 4              | 0.9004   | -0.15136 | 0.005767 |
| 170 | 6.18 | 6.18 | 21.8 | IPI:IPI00753303.2 | Gene_Symbol=Dapal (BLAST score: 644, P = 0.0) 0610010D20Rik Dihydrodipicolinate synthase-like, mitochondrial | 0.842375 | -0.24747 | 0.1678   |
| 171 | 6.13 | 6.13 | 17.8 | IPI:IPI00553717.6 | Gene_Symbol=Mccc2 Methylcrotonoyl-CoA carboxylase beta chain, mitochondrial                                  | 0.809975 | -0.30405 | 0.14655  |
| 172 | 6.07 | 6.07 | 13.2 | IPI:IPI00136655.1 | Gene_Symbol=Gcat 2-amino-3-ketobutyrate coenzyme A ligase, mitochondrial                                     | 0.905925 | -0.14254 | 0.1279   |
| 173 | 6.03 | 6.03 | 14.4 | IPI:IPI00400301.2 | Gene_Symbol=Cpox Coproporphyrinogen III oxidase, mitochondrial                                               | 0.84865  | -0.23676 | 0.0031   |
| 174 | 6.02 | 6.02 | 13.1 | IPI:IPI00330094.4 | Gene_Symbol=Cpt1a Carnitine O-palmitoyltransferase I, liver isoform                                          | 1.289775 | 0.367119 | 0.0056   |
| 175 | 6.02 | 6.02 | 15.4 | IPI:IPI00126635.1 | Gene_Symbol=Idh3b Tumor-related protein                                                                      | 0.902225 | -0.14844 | 0.0248   |
| 176 | 6.01 | 6.06 | 18.6 | IPI:IPI00459725.2 | Gene_Symbol=Idh3a Isoform 1 of Isocitrate dehydrogenase [NAD] subunit alpha, mitochondrial                   | 0.918    | -0.12343 | 0.0866   |
| 177 | 6    | 6    | 12.3 | IPI:IPI00131177.1 | Gene_Symbol=Letm1 LETM1 and EF-hand domain-containing protein 1, mitochondrial                               | 0.90555  | -0.14313 | 0.1925   |

|     |      |      |      |                   |                                                                                                                                                               |          |          |          |
|-----|------|------|------|-------------------|---------------------------------------------------------------------------------------------------------------------------------------------------------------|----------|----------|----------|
| 178 | 6    | 6    | 12.9 | IPI:IPI00117214.3 | Gene_Symbol=Hsd12 Hydroxysteroid dehydrogenase-like protein 2                                                                                                 | 0.9598   | -0.05919 | 0.534067 |
| 179 | 6    | 6    | 23.2 | IPI:IPI00453777.2 | Gene_Symbol=Atp5d ATP synthase subunit delta, mitochondrial                                                                                                   | 0.852    | -0.23107 | 0.0673   |
| 180 | 6    | 6    | 6.5  | IPI:IPI00321190.1 | Gene_Symbol=Psap Sulfated glycoprotein 1                                                                                                                      | 1.07115  | 0.099161 | NA       |
| 181 | 6    | 6    | 13.1 | IPI:IPI00170307.1 | Gene_Symbol=Apoa1bp Apolipoprotein A-I-binding protein                                                                                                        | 1.01765  | 0.025241 | 0.7585   |
| 182 | 6    | 6    | 42.1 | IPI:IPI00134484.1 | Gene_Symbol=Timm10;Timm13 Mitochondrial import inner membrane translocase subunit Tim13                                                                       | 0.708925 | -0.4963  | 0.0849   |
| 183 | 5.7  | 5.7  | 44.5 | IPI:IPI00881750.1 | Gene_Symbol=Ndufb5 14 kDa protein                                                                                                                             | 1.11715  | 0.159823 | 0.3236   |
| 184 | 5.52 | 5.52 | 59.2 | IPI:IPI00886222.1 | Gene_Symbol=Ndufs6 11 kDa protein                                                                                                                             | 0.979575 | -0.02977 | 0.28     |
| 185 | 5.5  | 5.5  | 27.3 | IPI:IPI00607025.2 | Gene_Symbol=Amacr 13 days embryo liver cDNA, RIKEN full-length enriched library, clone:2510003N10 product:alpha-methylacyl-CoA racemase, full insert sequence | 1.11295  | 0.154389 | NA       |
| 186 | 5.44 | 5.44 | 23.3 | IPI:IPI00131584.1 | Gene_Symbol=Slc25a20 Mitochondrial carnitine/acylcarnitine carrier protein                                                                                    | 1.1764   | 0.234379 | NA       |
| 187 | 5.4  | 5.4  | 38.6 | IPI:IPI00120451.1 | Gene_Symbol=Fabp1 Fatty acid-binding protein, liver                                                                                                           | 1.217875 | 0.284366 | 0.20105  |
| 188 | 5.34 | 5.45 | 48.6 | IPI:IPI00120719.4 | Gene_Symbol=Cox5a Cytochrome c oxidase subunit 5A, mitochondrial                                                                                              | 0.931475 | -0.10241 | 0.04415  |
| 189 | 5.26 | 5.35 | 25.4 | IPI:IPI00169925.2 | Gene_Symbol=Ndufv2 Isoform 1 of NADH dehydrogenase [ubiquinone] flavoprotein 2, mitochondrial                                                                 | 1.068875 | 0.096093 | 0.22445  |

|     |      |      |      |                   |                                                                                                                                                                                                             |          |          |         |
|-----|------|------|------|-------------------|-------------------------------------------------------------------------------------------------------------------------------------------------------------------------------------------------------------|----------|----------|---------|
| 190 | 5.22 | 5.22 | 12.5 | IPI:IPI00760085.1 | Gene_Symbol=Agxt Isoform Peroxisomal of Serine--<br>pyruvate aminotransferase, mitochondrial                                                                                                                | 0.961675 | -0.05638 | NA      |
| 191 | 5.01 | 5.01 | 11.2 | IPI:IPI00461197.1 | Gene_Symbol=Ldhd 10 days neonate skin cDNA,<br>RIKEN full-length enriched library, clone:4733401P21<br>product:weakly similar to PUTATIVE D-LACTATE<br>DEHYDROGENASE (CYTOCHROME)<br>OXIDOREDUCTASE PROTEIN | 1.039375 | 0.055716 | NA      |
| 192 | 5    | 5    | 19.1 | IPI:IPI00894832.1 | Gene_Symbol=Ctsc Adult male kidney cDNA, RIKEN<br>full-length enriched library, clone:0610010C21<br>product:cathepsin C, full insert sequence                                                               | 1.132975 | 0.180116 | NA      |
| 193 | 4.96 | 4.96 | 8.7  | IPI:IPI00124372.3 | Gene_Symbol=Aldh9a1 aldehyde dehydrogenase 9,<br>subfamily A1                                                                                                                                               | 0.923    | -0.1156  | 0.2909  |
| 194 | 4.92 | 4.92 | 29   | IPI:IPI00387430.1 | Gene_Symbol=Ndufb8 NADH dehydrogenase<br>[ubiquinone] 1 beta subcomplex subunit 8,<br>mitochondrial                                                                                                         | 0.99785  | -0.00311 | NA      |
| 195 | 4.92 | 4.92 | 27.6 | IPI:IPI00378120.2 | Gene_Symbol=Glrx5 Glutaredoxin-related protein 5                                                                                                                                                            | 0.97935  | -0.0301  | NA      |
| 196 | 4.9  | 4.93 | 24.9 | IPI:IPI00895984.1 | Gene_Symbol=Mup1 Major urinary protein 1                                                                                                                                                                    | 1.77775  | 0.830052 | NA      |
| 197 | 4.58 | 4.58 | 10.8 | IPI:IPI00658539.1 | Gene_Symbol=Ctsa cathepsin A isoform a                                                                                                                                                                      | 1.4081   | 0.49375  | NA      |
| 198 | 4.57 | 4.57 | 14.6 | IPI:IPI00265352.1 | Gene_Symbol=Gpt2 Alanine aminotransferase 2                                                                                                                                                                 | 0.82665  | -0.27465 | 0.0612  |
| 199 | 4.55 | 4.55 | 36   | IPI:IPI00120984.5 | Gene_Symbol=Ndufa8 NADH dehydrogenase<br>[ubiquinone] 1 alpha subcomplex subunit 8                                                                                                                          | 0.5566   | -0.84529 | #DIV/0! |

|     |      |      |      |                   |                                                                                                                                                                                                            |          |          |        |
|-----|------|------|------|-------------------|------------------------------------------------------------------------------------------------------------------------------------------------------------------------------------------------------------|----------|----------|--------|
| 200 | 4.55 | 4.55 | 54.9 | IPI:IPI00224210.5 | Gene_Symbol=Uqcrq Cytochrome b-c1 complex subunit 8                                                                                                                                                        | 0.9077   | -0.13971 | NA     |
| 201 | 4.49 | 4.49 | 22.7 | IPI:IPI00874574.1 | Gene_Symbol=Clybl 36 kDa protein                                                                                                                                                                           | 0.7923   | -0.33588 | NA     |
| 202 | 4.36 | 4.36 | 17.3 | IPI:IPI00648829.1 | Gene_Symbol=Nipsnap3a Nipsnap homolog 3A                                                                                                                                                                   | 0.8607   | -0.21642 | NA     |
| 203 | 4.3  | 4.31 | 14.6 | IPI:IPI00320850.3 | Gene_Symbol=Mccc1 Methylcrotonoyl-CoA carboxylase subunit alpha, mitochondrial                                                                                                                             | 0.9      | -0.152   | 0.0449 |
| 204 | 4.25 | 4.69 | 8.3  | IPI:IPI00751137.1 | Gene_Symbol=Tom70a Adult male thymus cDNA, RIKEN full-length enriched library, clone:5830412L10 product:Mitochondrial proteins import receptor (Translocase of outer membrane TOM70), full insert sequence | 1.11425  | 0.156073 | NA     |
| 205 | 4.23 | 4.23 | 19.1 | IPI:IPI00133270.1 | Gene_Symbol=Clpp Putative ATP-dependent Clp protease proteolytic subunit, mitochondrial                                                                                                                    | 0.917625 | -0.12402 | 0.4648 |
| 206 | 4.17 | 4.17 | 18.3 | IPI:IPI00120232.1 | Gene_Symbol=Ndufs7 NADH dehydrogenase [ubiquinone] iron-sulfur protein 7, mitochondrial                                                                                                                    | 1.13375  | 0.181103 | NA     |
| 207 | 4.16 | 4.2  | 7.4  | IPI:IPI00621548.2 | Gene_Symbol=Por NADPH--cytochrome P450 reductase                                                                                                                                                           | 0.80895  | -0.30588 | NA     |
| 208 | 4.15 | 6.15 | 10.8 | IPI:IPI00153143.1 | Gene_Symbol=Ugt2b1 UDP glucuronosyltransferase 2 family, polypeptide B1                                                                                                                                    | 0.90955  | -0.13678 | 0.0798 |
| 209 | 4.15 | 4.15 | 14.6 | IPI:IPI00762346.1 | Gene_Symbol=Aadat Kynurenine/alpha-aminoadipate aminotransferase mitochondrial                                                                                                                             | 1.11405  | 0.155814 | NA     |

|     |      |      |      |                   |                                                                                                       |          |          |        |
|-----|------|------|------|-------------------|-------------------------------------------------------------------------------------------------------|----------|----------|--------|
| 210 | 4.11 | 4.13 | 20.1 | IPI:IPI00133240.1 | Gene_Symbol=Uqcrcfs1 Cytochrome b-c1 complex subunit Rieske, mitochondrial                            | 0.97105  | -0.04238 | NA     |
| 211 | 4.1  | 4.1  | 25.7 | IPI:IPI00230715.5 | Gene_Symbol=Ndufa13 NADH dehydrogenase [ubiquinone] 1 alpha subcomplex subunit 13                     | 1.20045  | 0.263575 | NA     |
| 212 | 4.09 | 4.17 | 23.6 | IPI:IPI00119945.1 | Gene_Symbol=Nit2 Nitrilase homolog 2                                                                  | 0.984275 | -0.02287 | NA     |
| 213 | 4.07 | 4.07 | 17.9 | IPI:IPI00170093.3 | Gene_Symbol=Ndufs8 NADH dehydrogenase [ubiquinone] iron-sulfur protein 8, mitochondrial               | 0.94275  | -0.08505 | NA     |
| 214 | 4.03 | 4.03 | 43   | IPI:IPI00880613.1 | Gene_Symbol=Ndufb10 18 kDa protein                                                                    | 1.02315  | 0.033018 | NA     |
| 215 | 4.03 | 4.03 | 33   | IPI:IPI00132623.3 | Gene_Symbol=Ndufb9 NADH dehydrogenase [ubiquinone] 1 beta subcomplex subunit 9                        | 0.826975 | -0.27408 | 0.0572 |
| 216 | 4.02 | 4.02 | 27.1 | IPI:IPI00133284.1 | Gene_Symbol=(BLAST score: 530, P = 1e-149) D10Jhu81e;LOC100046684 ES1 protein homolog, mitochondrial  | 0.9155   | -0.12737 | 0.1868 |
| 217 | 4    | 4.01 | 8.2  | IPI:IPI00128287.1 | Gene_Symbol=Cyp1a2 Cytochrome P450 1A2                                                                | 1.03955  | 0.055959 | 0.0452 |
| 218 | 4    | 4    | 7.1  | IPI:IPI00127267.4 | Gene_Symbol=Gldc Glycine dehydrogenase [decarboxylating], mitochondrial                               | 0.939    | -0.0908  | 0.1823 |
| 219 | 4    | 4    | 12.2 | IPI:IPI00831119.1 | Gene_Symbol=Lypla1 21 kDa protein                                                                     | 0.93055  | -0.10384 | NA     |
| 220 | 4    | 4    | 22.7 | IPI:IPI00125776.1 | Gene_Symbol=ENSMUSG00000045455;Timm8a1 Mitochondrial import inner membrane translocase subunit Tim8 A | 0.654975 | -0.61049 | 0.0963 |
| 221 | 3.99 | 3.99 | 18   | IPI:IPI00129963.1 | Gene_Symbol=Phyh Phytanoyl-CoA dioxygenase, peroxisomal                                               | 1.19925  | 0.262132 | NA     |

|     |      |      |      |                   |                                                                                                                                                                               |          |          |        |
|-----|------|------|------|-------------------|-------------------------------------------------------------------------------------------------------------------------------------------------------------------------------|----------|----------|--------|
| 222 | 3.95 | 3.95 | 10.3 | IPI:IPI00828822.2 | Gene_Symbol=Es31 Isoform 2 of Liver carboxylesterase 31                                                                                                                       | 1.178475 | 0.236921 | NA     |
| 223 | 3.86 | 3.86 | 25.8 | IPI:IPI00230754.5 | Gene_Symbol=Slc25a11 Mitochondrial 2-oxoglutarate/malate carrier protein                                                                                                      | 1.052325 | 0.07358  | NA     |
| 224 | 3.81 | 3.86 | 15.1 | IPI:IPI00273164.1 | Gene_Symbol=Aldh5a1 Succinate-semialdehyde dehydrogenase, mitochondrial                                                                                                       | 0.8826   | -0.18017 | 0.0182 |
| 225 | 3.7  | 3.7  | 29.1 | IPI:IPI00875372.1 | Gene_Symbol=Echdc2 Isoform 2 of Enoyl-CoA hydratase domain-containing protein 2, mitochondrial                                                                                | 0.946275 | -0.07967 | NA     |
| 226 | 3.7  | 3.7  | 24.9 | IPI:IPI00125267.4 | Gene_Symbol=Vapa Vesicle-associated membrane protein-associated protein A                                                                                                     | 1.221025 | 0.288093 | NA     |
| 227 | 3.62 | 3.62 | 22.2 | IPI:IPI00130640.5 | Gene_Symbol=Hrsp12 Ribonuclease UK114                                                                                                                                         | 0.94755  | -0.07773 | NA     |
| 228 | 3.52 | 3.52 | 6.2  | IPI:IPI00606097.1 | Gene_Symbol=Tmprss13 transmembrane protease, serine 13                                                                                                                        | 1.206375 | 0.270678 | 0.025  |
| 229 | 3.44 | 3.44 | 7.7  | IPI:IPI00554830.2 | Gene_Symbol=Gulo L-gulonolactone oxidase                                                                                                                                      | 1.3087   | 0.388134 | 0.0881 |
| 230 | 3.41 | 3.41 | 14.2 | IPI:IPI00648852.2 | Gene_Symbol=Ppt1 2 days neonate thymus thymic cells cDNA, RIKEN full-length enriched library, clone:C920018O12 product:palmitoyl-protein thioesterase 1, full insert sequence | 1.24245  | 0.313188 | NA     |
| 231 | 3.38 | 3.38 | 9.2  | IPI:IPI00126634.1 | Gene_Symbol=Poldip2 Polymerase delta-interacting protein 2                                                                                                                    | 0.9095   | -0.13685 | 0.0139 |
| 232 | 3.34 | 3.34 | 28.8 | IPI:IPI00855212.1 | Gene_Symbol=1110020G09Rik Isoform 2 of UPF0465 protein C5orf33 homolog                                                                                                        | 0.88365  | -0.17845 | NA     |

|     |      |       |      |                   |                                                                                               |          |          |        |
|-----|------|-------|------|-------------------|-----------------------------------------------------------------------------------------------|----------|----------|--------|
| 233 | 3.3  | 4.2   | 5.8  | IPI:IPI00222968.1 | Gene_Symbol=Lamp2 Isoform LAMP-2C of Lysosome-associated membrane glycoprotein 2              | 1.361775 | 0.445488 | NA     |
| 234 | 3.29 | 3.32  | 18   | IPI:IPI00109275.1 | Gene_Symbol=Slc25a22 Mitochondrial glutamate carrier 1                                        | 1.0522   | 0.073409 | NA     |
| 235 | 3.25 | 3.26  | 10.6 | IPI:IPI00788396.1 | Gene_Symbol=C1px caseinolytic protease X isoform 2                                            | 1.06815  | 0.095114 | NA     |
| 236 | 3.22 | 6.44  | 19.4 | IPI:IPI00876341.1 | Gene_Symbol=Vdac3 Voltage-dependent anion-selective channel protein 3                         | 1.4952   | 0.580338 | NA     |
| 237 | 3.04 | 3.64  | 32.8 | IPI:IPI00116896.1 | Gene_Symbol=mt-Atp8 ATP synthase protein 8                                                    | 1.0048   | 0.006908 | NA     |
| 238 | 2.96 | 11.33 | 27.4 | IPI:IPI00122139.3 | Gene_Symbol=Acaa1b;Acaa1a 3-ketoacyl-CoA thiolase B, peroxisomal                              | 1.878575 | 0.909639 | NA     |
| 239 | 2.96 | 2.99  | 45.1 | IPI:IPI00111770.7 | Gene_Symbol=Atp5k ATP synthase subunit e, mitochondrial                                       | 0.804125 | -0.31451 | 0.0103 |
| 240 | 2.92 | 2.92  | 17.3 | IPI:IPI00133403.1 | Gene_Symbol=Ndufb3 NADH dehydrogenase [ubiquinone] 1 beta subcomplex subunit 3                | 1.062925 | 0.08804  | NA     |
| 241 | 2.89 | 2.89  | 32.8 | IPI:IPI00133399.1 | Gene_Symbol=Ndufa6 NADH dehydrogenase [ubiquinone] 1 alpha subcomplex subunit 6               | 0.99485  | -0.00745 | NA     |
| 242 | 2.86 | 2.86  | 4.1  | IPI:IPI00886014.1 | Gene_Symbol=Acss3 Isoform 1 of Acyl-CoA synthetase short-chain family member 3, mitochondrial | 0.965475 | -0.05069 | NA     |
| 243 | 2.8  | 2.8   | 6.2  | IPI:IPI00889240.1 | Gene_Symbol=Adhfe1 Isoform 2 of Hydroxyacid-oxoacid transhydrogenase, mitochondrial           | 1.0576   | 0.080794 | NA     |
| 244 | 2.7  | 2.72  | 5.8  | IPI:IPI00221608.3 | Gene_Symbol=Samm50 Sorting and assembly machinery component 50 homolog                        | 1.371975 | 0.456254 | NA     |

|     |      |      |      |                   |                                                                                                                                                               |          |          |    |
|-----|------|------|------|-------------------|---------------------------------------------------------------------------------------------------------------------------------------------------------------|----------|----------|----|
| 245 | 2.62 | 2.62 | 12.9 | IPI:IPI00125266.1 | Gene_Symbol=Asah1 Acid ceramidase                                                                                                                             | 1.067325 | 0.094    | NA |
| 246 | 2.5  | 2.5  | 10.7 | IPI:IPI00137491.1 | Gene_Symbol=Acp5 Tartrate-resistant acid phosphatase type 5                                                                                                   | 1.251875 | 0.324091 | NA |
| 247 | 2.42 | 2.42 | 9.2  | IPI:IPI00274222.2 | Gene_Symbol=Acad8 Isobutyryl-CoA dehydrogenase, mitochondrial                                                                                                 | 1.2061   | 0.27035  | NA |
| 248 | 2.37 | 2.37 | 3.9  | IPI:IPI00111960.2 | Gene_Symbol=Gaa Lysosomal alpha-glucosidase                                                                                                                   | 1.05115  | 0.071969 | NA |
| 249 | 2.35 | 2.37 | 19.2 | IPI:IPI00662861.1 | Gene_Symbol=LOC635087 similar to NADH dehydrogenase (ubiquinone) 1, subcomplex unknown, 2                                                                     | 1.21915  | 0.285876 | NA |
| 250 | 2.33 | 2.33 | 7.9  | IPI:IPI00874376.1 | Gene_Symbol=Apool 10, 11 days embryo whole body cDNA, RIKEN full-length enriched library, clone:2810024N24 product:hypothetical protein, full insert sequence | 1.3363   | 0.418244 | NA |
| 251 | 2.25 | 2.25 | 9.4  | IPI:IPI00170126.4 | Gene_Symbol=Ptrm1 Isoform 1 of Presequence protease, mitochondrial                                                                                            | 0.941825 | -0.08647 | NA |
| 252 | 2.22 | 2.22 | 7.5  | IPI:IPI00131176.1 | Gene_Symbol=mt-Co2 Cytochrome c oxidase subunit 2                                                                                                             | 1.254975 | 0.327659 | NA |
| 253 | 2.21 | 2.21 | 24.4 | IPI:IPI00222430.5 | Gene_Symbol=Dbi diazepam binding inhibitor isoform 1                                                                                                          | 0.7018   | -0.51087 | NA |
| 254 | 2.2  | 2.2  | 14.3 | IPI:IPI00229008.2 | Gene_Symbol=Ndufs4 NADH dehydrogenase [ubiquinone] iron-sulfur protein 4, mitochondrial                                                                       | 0.774075 | -0.36945 | NA |
| 255 | 2.19 | 4.19 | 13.7 | IPI:IPI00762185.2 | Gene_Symbol=Mpst 3-mercaptopyruvate sulfurtransferase                                                                                                         | 0.9665   | -0.04916 | NA |
| 256 | 2.17 | 2.17 | 7.8  | IPI:IPI00855011.1 | Gene_Symbol=LOC100046998 similar to optic atrophy 1                                                                                                           | 0.8715   | -0.19843 | NA |



|     |      |      |      |                   |                                                                                                                                                                   |          |          |    |
|-----|------|------|------|-------------------|-------------------------------------------------------------------------------------------------------------------------------------------------------------------|----------|----------|----|
| 257 | 2.15 | 2.15 | 7.8  | IPI:IPI00387282.4 | Gene_Symbol=Aadac Arylacetamide deacetylase                                                                                                                       | 1.47755  | 0.563207 | NA |
| 258 | 2.15 | 2.15 | 15   | IPI:IPI00317074.3 | Gene_Symbol=Slc25a10 Mitochondrial dicarboxylate carrier                                                                                                          | 1.244575 | 0.315653 | NA |
| 259 | 2.11 | 2.11 | 18.6 | IPI:IPI00128023.3 | Gene_Symbol=Ndufs2 NADH dehydrogenase [ubiquinone] iron-sulfur protein 2, mitochondrial                                                                           | 0.82805  | -0.27221 | NA |
| 260 | 2.11 | 2.11 | 6.4  | IPI:IPI00109169.1 | Gene_Symbol=ldh3g Isocitrate dehydrogenase [NAD] subunit gamma, mitochondrial                                                                                     | 0.876825 | -0.18964 | NA |
| 261 | 2.09 | 2.09 | 8.9  | IPI:IPI00121218.5 | Gene_Symbol=Fahd2a Fumarylacetoacetate hydrolase domain-containing protein 2A                                                                                     | 1.01175  | 0.016853 | NA |
| 262 | 2.08 | 2.09 | 11.2 | IPI:IPI00895479.1 | Gene_Symbol=2810422J05Rik 27 kDa protein (Ubiquitin)                                                                                                              | 1.3855   | 0.470407 | NA |
| 263 | 2.08 | 2.08 | 18.1 | IPI:IPI00133411.1 | Gene_Symbol=Fam136a (BLAST score:280, P =2e-74) 2010309E21Rik Protein FAM136A                                                                                     | 0.83045  | -0.26803 | NA |
| 264 | 2.07 | 2.07 | 4.9  | IPI:IPI00653566.1 | Gene_Symbol=Acot2 Activated spleen cDNA, RIKEN full-length enriched library, clone:F830219O19 product:mitochondrial acyl-CoA thioesterase 1, full insert sequence | 1.18165  | 0.240803 | NA |
| 265 | 2.05 | 2.05 | 7.1  | IPI:IPI00122634.1 | Gene_Symbol=Cyp2a12 Cytochrome P450, family 2, subfamily a, polypeptide 12                                                                                        | 1.274275 | 0.349677 | NA |
| 266 | 2.05 | 2.05 | 12.1 | IPI:IPI00132958.1 | Gene_Symbol=Them2 Thioesterase superfamily member 2                                                                                                               | 1.020175 | 0.028817 | NA |
| 267 | 2.04 | 2.04 | 12.4 | IPI:IPI00475322.1 | Gene_Symbol=Msra Msra protein                                                                                                                                     | 1.10895  | 0.149194 | NA |
| 268 | 2.02 | 2.06 | 14.7 | IPI:IPI00556699.1 | Gene_Symbol=Gcsh Putative uncharacterized protein                                                                                                                 | 0.94935  | -0.07499 | NA |

|     |      |      |      |                     |                                                                                                                                                                          |          |          |    |
|-----|------|------|------|---------------------|--------------------------------------------------------------------------------------------------------------------------------------------------------------------------|----------|----------|----|
| 269 | 2.02 | 2.03 | 5.6  | IPI:IPI00845617.1   | Gene_Symbol=Plb1 (Putative phospholipase B-like 1, BLAST score: 1096, P =0.0) LOC100045163 similar to RIKEN cDNA 1100001H23 gene                                         | 1.22775  | 0.296017 | NA |
| 270 | 2.02 | 2.02 | 7.9  | IPI:IPI00133877.1   | Gene_Symbol=Cyp4a14 Cytochrome P450 4A14                                                                                                                                 | 1.1594   | 0.213378 | NA |
| 271 | 2.01 | 2.01 | 14.8 | IPI:IPI00114866.1   | Gene_Symbol=Mlycd Isoform Mitochondrial of Malonyl-CoA decarboxylase, mitochondrial                                                                                      | 1.1877   | 0.24817  | NA |
| 272 | 2    | 4.25 | 17.8 | IPI:IPI00135231.2   | Gene_Symbol=ldh1 0 day neonate lung cDNA, RIKEN full-length enriched library, clone:E030024J03 product:isocitrate dehydrogenase 1 (NADP+), soluble, full insert sequence | 1.074525 | 0.103699 | NA |
| 273 | 2    | 4    | 8.8  | IPI:IPI00762478.1   | Gene_Symbol=Acsm3 Isoform 1 of Acyl-coenzyme A synthetase ACSM3, mitochondrial                                                                                           | 1.130275 | 0.176674 | NA |
| 274 | 2    | 2.33 | 4.9  | XXXXX IPI:IPI006531 | RANDOMIZED Gene_Symbol=Mfn1 Mitofusin-1                                                                                                                                  | 1.2749   | 0.350384 | NA |
| 275 | 2    | 2.02 | 6.7  | IPI:IPI00274656.6   | Gene_Symbol=Pmpcb Mitochondrial-processing peptidase subunit beta                                                                                                        | 0.88855  | -0.17048 | NA |
| 276 | 2    | 2    | 14.4 | IPI:IPI00118963.1   | Gene_Symbol=Mrpl12 39S ribosomal protein L12, mitochondrial                                                                                                              | 0.896675 | -0.15734 | NA |
| 277 | 2    | 2    | 21.9 | IPI:IPI00114246.2   | Gene_Symbol=Ndufb11 NADH dehydrogenase [ubiquinone] 1 beta subcomplex subunit 11, mitochondrial                                                                          | 0.921925 | -0.11728 | NA |
| 278 | 2    | 2    | 2.3  | IPI:IPI00355248.5   | Gene_Symbol=mt-Co1 cytochrome c oxidase subunit I                                                                                                                        | 1.303575 | 0.382474 | NA |

|     |       |       |      |                   |                                                                                                                                        |
|-----|-------|-------|------|-------------------|----------------------------------------------------------------------------------------------------------------------------------------|
| 279 | 2.68  | 2.68  | 17.3 | IPI:IPI00608064.1 | Gene_Symbol=Fech Fech protein (Fragment)                                                                                               |
| 280 | 2.07  | 2.07  | 19.4 | IPI:IPI00331322.3 | Gene_Symbol=Mgst1 Microsomal glutathione S-transferase 1                                                                               |
| 281 | 2.13  | 2.13  | 15   | IPI:IPI00115117.1 | Gene_Symbol=Stoml2 Stomatin-like protein 2                                                                                             |
| 282 | 2.04  | 3.35  | 16.9 | IPI:IPI00319973.3 | Gene_Symbol=Pgrmc1 Membrane-associated progesterone receptor component 1                                                               |
| 283 | 7.65  | 7.65  | 21.2 | IPI:IPI00331436.4 | Gene_Symbol=Lap3 Isoform 1 of Cytosol aminopeptidase                                                                                   |
| 284 | 2.36  | 2.36  | 11.1 | IPI:IPI00877288.1 | Gene_Symbol=Pgcp Isoform 2 of Plasma glutamate carboxypeptidase                                                                        |
| 285 | 2.09  | 2.09  | 11.7 | IPI:IPI00457825.2 | Gene_Symbol=- 47 kDa protein                                                                                                           |
| 286 | 2.27  | 2.27  | 22   | IPI:IPI00127227.2 | Gene_Symbol=Cbr4 Carbonyl reductase 4                                                                                                  |
| 287 | 14.61 | 14.61 | 32.5 | IPI:IPI00903424.1 | Gene_Symbol=Prss3 Adult male small intestine cDNA, RIKEN full-length enriched library, clone:2010010O17 product:Trypsinogen 16 homolog |
| 288 | 12.38 | 12.38 | 34   | IPI:IPI00121833.3 | Gene_Symbol=Acaa1b;Acaa1a 3-ketoacyl-CoA thiolase A, peroxisomal                                                                       |
| 289 | 7     | 7     | 31.3 | IPI:IPI00831055.2 | Gene_Symbol=- Beta-globin                                                                                                              |
| 290 | 6     | 6     | 26.2 | IPI:IPI00132799.4 | Gene_Symbol=C1qbp complement component 1, q subcomponent binding protein                                                               |
| 291 | 5.32  | 5.32  | 13.9 | IPI:IPI00123639.1 | Gene_Symbol=Calr Calreticulin                                                                                                          |
| 292 | 4.8   | 4.8   | 4.7  | IPI:IPI00271951.5 | Gene_Symbol=Pdia4 protein disulfide isomerase associated 4                                                                             |

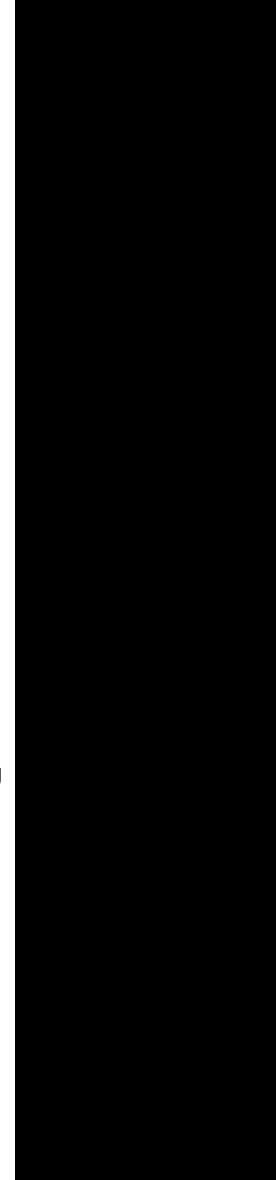

|     |      |      |      |                   |                                                                                                                                                                            |
|-----|------|------|------|-------------------|----------------------------------------------------------------------------------------------------------------------------------------------------------------------------|
| 293 | 4.53 | 4.57 | 13   | IPI:IPI00129526.1 | Gene_Symbol=Hsp90b1 Endoplasmin                                                                                                                                            |
| 294 | 4.5  | 4.54 | 28.5 | IPI:IPI00652845.3 | Gene_Symbol=Pecr In vitro fertilized eggs cDNA, RIKEN full-length enriched library, clone:7420405J16 product:peroxisomal trans-2-enoyl-CoA reductase, full insert sequence |
| 295 | 4.36 | 7.88 | 16.7 | IPI:IPI00875511.1 | Gene_Symbol=Mosc1 MOCO sulphurase C-terminal domain containing 1                                                                                                           |
| 296 | 4    | 10.6 | 12.6 | IPI:IPI00759953.1 | Gene_Symbol=1810049H19Rik;Try4 Tesp4 protein                                                                                                                               |
| 297 | 4    | 4    | 14.3 | IPI:IPI00881534.1 | Gene_Symbol=Ppa2 38 kDa protein                                                                                                                                            |
| 298 | 3.08 | 3.08 | 11.6 | IPI:IPI00133108.1 | Gene_Symbol=Klk5 18-day embryo whole body cDNA, RIKEN full-length enriched library, clone:1110030O19 product:similar to Kallikrein 5                                       |
| 299 | 2.89 | 8.89 | 21.1 | IPI:IPI00403650.2 | Gene_Symbol=Prss2 Anionic trypsin-2                                                                                                                                        |
| 300 | 2.89 | 2.89 | 11   | IPI:IPI00222767.1 | Gene_Symbol=Pdhx Pyruvate dehydrogenase protein X component, mitochondrial                                                                                                 |
| 301 | 2.67 | 2.7  | 14.7 | IPI:IPI00409412.3 | Gene_Symbol=Cyp2c67 Cytochrome P450, family 2, subfamily c, polypeptide 67                                                                                                 |
| 302 | 2.41 | 2.41 | 12.3 | IPI:IPI00128154.1 | Gene_Symbol=Ctsl Cathepsin L1                                                                                                                                              |
| 303 | 2.34 | 2.34 | 25.7 | IPI:IPI00762203.2 | Gene_Symbol=Ftl1 Ferritin light chain 1                                                                                                                                    |
| 304 | 2.34 | 2.34 | 4.7  | IPI:IPI00761390.1 | Gene_Symbol=Slc27a2 solute carrier family 27 (fatty acid transporter), member 2                                                                                            |

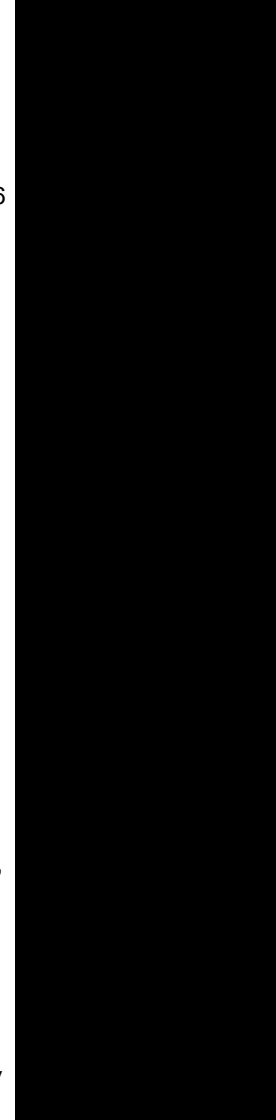

|     |      |      |                        |                                                                                           |
|-----|------|------|------------------------|-------------------------------------------------------------------------------------------|
| 305 | 2.3  | 2.35 | 5.9 IPI:IPI00309035.2  | Gene_Symbol=Rpn1 Dolichyl-diphosphooligosaccharide--protein glycosyltransferase subunit 1 |
| 306 | 2.3  | 2.3  | 44.2 IPI:IPI00230241.6 | Gene_Symbol=Atp5e ATP synthase subunit epsilon, mitochondrial                             |
| 307 | 2.29 | 2.29 | 67.5 IPI:IPI00114377.1 | Gene_Symbol=Cox7a2 Cytochrome c oxidase polypeptide 7A2, mitochondrial                    |
| 308 | 2.23 | 2.25 | 3.1 IPI:IPI00848562.1  | Gene_Symbol=Ubr4 retinoblastoma-associated factor 600 isoform 2                           |
| 309 | 2.15 | 2.15 | 12.4 IPI:IPI00753211.1 | Gene_Symbol=Echdc3 Enoyl Coenzyme A hydratase domain containing 3                         |
| 310 | 2.13 | 3.84 | 6.1 IPI:IPI00756257.1  | Gene_Symbol=Ttn Isoform 1 of Titin                                                        |
| 311 | 2.12 | 2.12 | 2.6 XXXXXIPI:IPI00788  | RANDOMIZED Gene_Symbol=Usp48 Isoform 1 of Ubiquitin carboxyl-terminal hydrolase 48        |
| 312 | 2.06 | 2.15 | 16.9 IPI:IPI00129516.1 | Gene_Symbol=Uqcrh Cytochrome b-c1 complex subunit 6, mitochondrial                        |
| 313 | 2.05 | 2.05 | 13 IPI:IPI00115454.3   | Gene_Symbol=Sfxn1 Sideroflexin-1                                                          |
| 314 | 2.04 | 2.05 | 9.3 IPI:IPI00134504.1  | Gene_Symbol=Cyp3a11 Cytochrome P450 3A11                                                  |

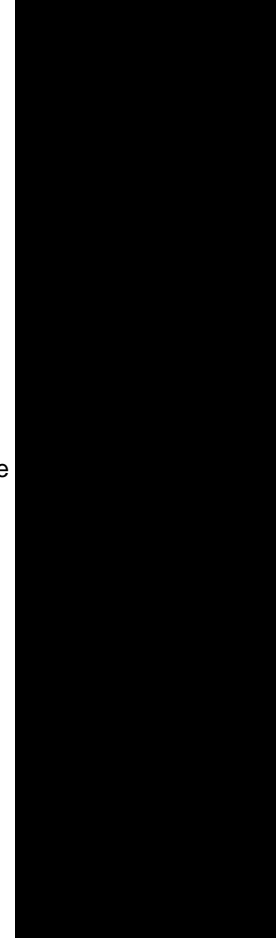

B) 28

| NO. | UNUSED | TOTAL  | % COV | ACCESSION         | NAME                                                                                                                                           | AVG FOLD |                  |             |
|-----|--------|--------|-------|-------------------|------------------------------------------------------------------------------------------------------------------------------------------------|----------|------------------|-------------|
|     |        |        |       |                   |                                                                                                                                                | CHANGE   | LOG <sub>2</sub> | P-VALUE     |
| 1   | 183.93 | 183.93 | 64.4  | IPI:IPI00111908.8 | Gene_Symbol=Cps1 Carbamoyl-phosphate synthase [ammonia], mitochondrial                                                                         | 1.226375 | 0.2944           | 0           |
| 2   | 53.16  | 53.17  | 43.5  | IPI:IPI00114710.2 | Gene_Symbol=Pcx Activated spleen cDNA, RIKEN full-length enriched library, clone:F830201B12 product:pyruvate carboxylase, full insert sequence | 1.44945  | 0.535506         | 0           |
| 3   | 50.83  | 50.83  | 51.6  | IPI:IPI00114209.1 | Gene_Symbol=Glud1 Glutamate dehydrogenase 1, mitochondrial                                                                                     | 1.2509   | 0.322966         | 0.00145     |
| 4   | 49.94  | 49.94  | 65.5  | IPI:IPI00869393.1 | Gene_Symbol=Cat catalase                                                                                                                       | 0.4346   | -1.20224         | 0           |
| 5   | 48.03  | 48.03  | 56.8  | IPI:IPI00461964.3 | Gene_Symbol=Aldh6a1 Methylmalonate-semialdehyde dehydrogenase [acylating], mitochondrial                                                       | 1.071325 | 0.099396         | 0.0278      |
| 6   | 47.61  | 47.61  | 51.7  | IPI:IPI00880839.1 | Gene_Symbol=Hspa9 heat shock protein 9                                                                                                         | 1.1265   | 0.171847         | 0.002933333 |
| 7   | 46.26  | 46.26  | 49    | IPI:IPI00554834.2 | Gene_Symbol=Ehhadh Peroxisomal bifunctional enzyme                                                                                             | 0.3947   | -1.34117         | 0           |
| 8   | 46.18  | 46.18  | 45.9  | IPI:IPI00111218.1 | Gene_Symbol=Aldh2 Aldehyde dehydrogenase, mitochondrial                                                                                        | 1.0302   | 0.042924         | 0.0592      |
| 9   | 45.37  | 45.37  | 47.3  | IPI:IPI00223092.5 | Gene_Symbol=Hadha Trifunctional enzyme subunit alpha, mitochondrial                                                                            | 0.9273   | -0.10889         | 0.0255      |
| 10  | 43.42  | 43.42  | 39    | IPI:IPI00120123.1 | Gene_Symbol=Dmgdh Dimethylglycine dehydrogenase, mitochondrial                                                                                 | 1.071725 | 0.099935         | 0.0224      |
| 11  | 43.03  | 43.03  | 52.2  | IPI:IPI00420718.4 | Gene_Symbol=Hmgcs2 Hydroxymethylglutaryl-CoA synthase, mitochondrial                                                                           | 0.99225  | -0.01122         | 0.1694      |
| 12  | 41.56  | 41.56  | 64.1  | IPI:IPI00468481.2 | Gene_Symbol=Atp5b ATP synthase subunit beta, mitochondrial                                                                                     | 1.06205  | 0.086852         | 0.0451      |
| 13  | 40.72  | 40.72  | 56.7  | IPI:IPI00117312.1 | Gene_Symbol=Got2 Aspartate aminotransferase, mitochondrial                                                                                     | 1.1201   | 0.163628         | 0.002825    |
| 14  | 39.24  | 39.24  | 63.3  | IPI:IPI00129178.1 | Gene_Symbol=Oat Ornithine aminotransferase, mitochondrial                                                                                      | 1.040925 | 0.057866         | 0.1265      |
| 15  | 38.89  | 38.89  | 56    | IPI:IPI00308885.6 | Gene_Symbol=Hspd1 Isoform 1 of 60 kDa heat shock protein, mitochondrial                                                                        | 1.138475 | 0.187103         | 0.001633333 |
| 16  | 36.49  | 36.49  | 49.9  | IPI:IPI00130280.1 | Gene_Symbol=Atp5a1 ATP synthase subunit alpha, mitochondrial                                                                                   | 1.054125 | 0.076046         | 0.066533333 |

|    |       |       |      |                   |                                                                                                                    |          |          |             |
|----|-------|-------|------|-------------------|--------------------------------------------------------------------------------------------------------------------|----------|----------|-------------|
| 17 | 35.03 | 35.03 | 61.5 | IPI:IPI00653158.1 | Gene_Symbol=Acaa2 Acetyl-Coenzyme A acyltransferase 2 (Mitochondrial 3-oxoacyl-Coenzyme A thiolase), isoform CRA_k | 1.009375 | 0.013462 | 0.7941      |
| 18 | 34.83 | 34.83 | 59.1 | IPI:IPI00223367.5 | Gene_Symbol=Uox Uricase                                                                                            | 0.553375 | -0.85367 | 0           |
| 19 | 34.1  | 34.1  | 43.9 | IPI:IPI00828479.1 | Gene_Symbol=Acox1 Acyl-Coenzyme A oxidase 1, palmitoyl                                                             | 0.560325 | -0.83566 | 0.00015     |
| 20 | 33    | 33    | 40.9 | IPI:IPI00119203.4 | Gene_Symbol=Acadv1 Very long-chain specific acyl-CoA dehydrogenase, mitochondrial                                  | 1.096625 | 0.13307  | 0.00685     |
| 21 | 32.28 | 32.28 | 40.8 | IPI:IPI00875638.1 | Gene_Symbol=Immt Isoform 3 of Mitochondrial inner membrane protein                                                 | 1.037    | 0.052416 | 0.1641      |
| 22 | 31.96 | 31.97 | 50.1 | IPI:IPI00459487.3 | Gene_Symbol=Suclg2 Isoform 1 of Succinyl-CoA ligase [GDP-forming] subunit beta, mitochondrial                      | 1.050225 | 0.070698 | 0.0701      |
| 23 | 31.15 | 31.16 | 56.8 | IPI:IPI00154054.1 | Gene_Symbol=Acat1 Acetyl-CoA acetyltransferase, mitochondrial                                                      | 0.951075 | -0.07237 | 0.073333333 |
| 24 | 30.62 | 30.62 | 35.4 | IPI:IPI00115607.3 | Gene_Symbol=Hadhb Trifunctional enzyme subunit beta, mitochondrial                                                 | 0.99545  | -0.00658 | 0.4414      |
| 25 | 29.71 | 29.71 | 40.3 | IPI:IPI00121322.2 | Gene_Symbol=Etfdh Electron transfer flavoprotein-ubiquinone oxidoreductase, mitochondrial                          | 1.01885  | 0.026942 | 0.3831      |
| 26 | 29.63 | 29.63 | 25.7 | IPI:IPI00387491.1 | Gene_Symbol=Aass Alpha-amino adipic semialdehyde synthase, mitochondrial                                           | 1.32005  | 0.400593 | 0.001233333 |
| 27 | 29.36 | 29.36 | 33.9 | IPI:IPI00261627.1 | Gene_Symbol=Sucla2 Succinyl-CoA ligase [ADP-forming] subunit beta, mitochondrial                                   | 1.091375 | 0.126147 | 0.06155     |
| 28 | 28.47 | 28.47 | 38.5 | IPI:IPI00116074.1 | Gene_Symbol=Aco2 Aconitate hydratase, mitochondrial                                                                | 1.08195  | 0.113634 | 0.06465     |
| 29 | 28.24 | 28.24 | 24.9 | IPI:IPI00134131.2 | Gene_Symbol=Scp2 Isoform SCPx of Non-specific lipid-transfer protein                                               | 0.5737   | -0.80163 | 0           |
| 30 | 28.08 | 28.08 | 33.7 | IPI:IPI00331628.5 | Gene_Symbol=Hsd17b4 Peroxisomal multifunctional enzyme type 2                                                      | 0.51495  | -0.9575  | 0           |
| 31 | 27.76 | 27.76 | 33.9 | IPI:IPI00136213.5 | Gene_Symbol=Sardh Sarcosine dehydrogenase, mitochondrial                                                           | 1.064825 | 0.090616 | 0.0201      |
| 32 | 27.2  | 27.39 | 40.9 | IPI:IPI00894588.1 | Gene_Symbol=Acadl Long-chain specific acyl-CoA dehydrogenase, mitochondrial                                        | 1.03285  | 0.046631 | 0.3924      |
| 33 | 26.25 | 26.25 | 33.3 | IPI:IPI00122633.3 | Gene_Symbol=Acsf2 Acyl-CoA synthetase family member 2, mitochondrial                                               | 1.017675 | 0.025277 | 0.2405      |
| 34 | 26.15 | 26.15 | 38.7 | IPI:IPI00776257.1 | Gene_Symbol=Otc Otc protein                                                                                        | 1.0244   | 0.034779 | 0.0478      |
| 35 | 25.34 | 25.36 | 48.2 | IPI:IPI00323592.2 | Gene_Symbol=Mdh2 Malate dehydrogenase, mitochondrial                                                               | 1.10195  | 0.140059 | 0.02095     |

|    |       |       |      |                   |                                                                                                                                      |          |          |          |
|----|-------|-------|------|-------------------|--------------------------------------------------------------------------------------------------------------------------------------|----------|----------|----------|
| 36 | 25.18 | 25.18 | 46.6 | IPI:IPI00119138.1 | Gene_Symbol=Uqcrc2 Cytochrome b-c1 complex subunit 2, mitochondrial                                                                  | 1.03985  | 0.056375 | 0.0416   |
| 37 | 24.48 | 24.48 | 29.2 | IPI:IPI00857226.1 | Gene_Symbol=Acs1 78 kDa protein                                                                                                      | 0.731225 | -0.45161 | 0.000075 |
| 38 | 23.43 | 23.43 | 75.3 | IPI:IPI00221769.5 | Gene_Symbol=Ak3 GTP:AMP phosphotransferase mitochondrial                                                                             | 1.095575 | 0.131688 | 0.0242   |
| 39 | 23.13 | 23.13 | 37.5 | IPI:IPI00405699.2 | Gene_Symbol=Aldh4a1 Delta-1-pyrroline-5-carboxylate dehydrogenase, mitochondrial                                                     | 1.087    | 0.120352 | 0.0039   |
| 40 | 22.18 | 22.18 | 43.4 | IPI:IPI00331251.1 | Gene_Symbol=Acads Acyl-Coenzyme A dehydrogenase, short chain, isoform CRA_a                                                          | 1.045975 | 0.064848 | 0.0478   |
| 41 | 20.92 | 21    | 26.3 | IPI:IPI00553576.3 | Gene_Symbol=Abcd3 ATP-binding cassette, sub-family D, member 3                                                                       | 0.55555  | -0.84801 | 0.000275 |
| 42 | 20.57 | 20.57 | 41.9 | IPI:IPI00127841.3 | Gene_Symbol=Slc25a5 ADP/ATP translocase 2                                                                                            | 1.1159   | 0.158208 | 0.02835  |
| 43 | 20.5  | 20.5  | 50.8 | IPI:IPI00223216.5 | Gene_Symbol=Tst Thiosulfate sulfurtransferase                                                                                        | 1.09625  | 0.132577 | 0.03225  |
| 44 | 20.33 | 20.33 | 30.1 | IPI:IPI00133522.1 | Gene_Symbol=P4hb Protein disulfide-isomerase                                                                                         | 0.64545  | -0.63162 | 0.000075 |
| 45 | 20    | 20    | 23.9 | IPI:IPI00129928.2 | Gene_Symbol=Fh1 Isoform Mitochondrial of Fumarate hydratase, mitochondrial                                                           | 1.142025 | 0.191594 | 0.0398   |
| 46 | 19.9  | 19.91 | 47.9 | IPI:IPI00454049.4 | Gene_Symbol=Echs1 Enoyl-CoA hydratase, mitochondrial                                                                                 | 1.1311   | 0.177726 | 0.0293   |
| 47 | 19.76 | 19.77 | 54.3 | IPI:IPI00848492.1 | Gene_Symbol=LOC100045699 similar to Electron transferring flavoprotein, beta polypeptide isoform 2                                   | 1.0153   | 0.021906 | 0.0412   |
| 48 | 19.55 | 19.55 | 38   | IPI:IPI00134961.1 | Gene_Symbol=Acadm Medium-chain specific acyl-CoA dehydrogenase, mitochondrial                                                        | 0.9922   | -0.0113  | 0.085    |
| 49 | 19.08 | 19.1  | 54   | IPI:IPI00648318.1 | Gene_Symbol=Ak2 Adult male liver tumor cDNA, RIKEN full-length enriched library, clone:C730019E03 product:ADENYLATE KINASE 2 homolog | 1.000925 | 0.001334 | 0.1762   |
| 50 | 19.08 | 19.08 | 45.2 | IPI:IPI00154047.1 | Gene_Symbol=Hibch 3-hydroxyisobutyryl-CoA hydrolase, mitochondrial                                                                   | 1.200925 | 0.264146 | 0.1157   |
| 51 | 19.06 | 19.07 | 36   | IPI:IPI00121105.2 | Gene_Symbol=Hadh Hydroxyacyl-coenzyme A dehydrogenase, mitochondrial                                                                 | 0.99355  | -0.00934 | 0.0832   |
| 52 | 18.6  | 18.6  | 53.8 | IPI:IPI00116753.4 | Gene_Symbol=Etfa Electron transfer flavoprotein subunit alpha, mitochondrial                                                         | 1.066325 | 0.092647 | 0.027    |
| 53 | 18.45 | 18.45 | 29.7 | IPI:IPI00135651.1 | Gene_Symbol=Slc25a13 Calcium-binding mitochondrial carrier protein Aralar2                                                           | 1.07585  | 0.105477 | 0.0841   |
| 54 | 18.42 | 18.42 | 32.5 | IPI:IPI00471246.2 | Gene_Symbol=lvd Isovaleryl-CoA dehydrogenase, mitochondrial                                                                          | 1.046025 | 0.064917 | 0.11625  |



|    |       |       |      |                   |                                                                                                                                                         |          |          |         |
|----|-------|-------|------|-------------------|---------------------------------------------------------------------------------------------------------------------------------------------------------|----------|----------|---------|
| 55 | 18.29 | 18.29 | 28.5 | IPI:IPI00881091.1 | Gene_Symbol=Ctsd Bone marrow macrophage cDNA, RIKEN full-length enriched library, clone:I830005110<br>product:cathepsin D, full insert sequence         | 0.830375 | -0.26817 | 0.01455 |
| 56 | 17.66 | 17.66 | 45.6 | IPI:IPI00129056.2 | Gene_Symbol=Glyat Isoform 1 of Glycine N-acyltransferase                                                                                                | 1.20295  | 0.266577 | 0.01005 |
| 57 | 17.56 | 17.56 | 24.2 | IPI:IPI00226140.5 | Gene_Symbol=Maob Amine oxidase [flavin-containing] B                                                                                                    | 1.0506   | 0.071213 | 0.0654  |
| 58 | 17.35 | 17.36 | 22.1 | IPI:IPI00308882.4 | Gene_Symbol=Ndufs1 NADH-ubiquinone oxidoreductase 75 kDa subunit, mitochondrial                                                                         | 1.054175 | 0.076114 | 0.0583  |
| 59 | 17.09 | 17.1  | 31.2 | IPI:IPI00230351.1 | Gene_Symbol=Sdha Succinate dehydrogenase [ubiquinone] flavoprotein subunit, mitochondrial                                                               | 1.1603   | 0.214498 | 0.1472  |
| 60 | 16.76 | 16.76 | 25.9 | IPI:IPI00625588.1 | Gene_Symbol=- hypothetical protein                                                                                                                      | 1.1344   | 0.181929 | 0.0722  |
| 61 | 16.62 | 16.62 | 36.7 | IPI:IPI00130535.1 | Gene_Symbol=Dbt Lipoamide acyltransferase component of branched-chain alpha-keto acid dehydrogenase complex, mitochondrial                              | 1.054425 | 0.076456 | 0.036   |
| 62 | 16.53 | 16.61 | 28.8 | IPI:IPI00126625.1 | Gene_Symbol=Acsm1 Isoform 1 of Acyl-coenzyme A synthetase ACSM1, mitochondrial                                                                          | 1.118875 | 0.162049 | 0.03645 |
| 63 | 16.23 | 16.23 | 47.4 | IPI:IPI00133440.1 | Gene_Symbol=Phb Prohibitin                                                                                                                              | 1.082625 | 0.114534 | 0.0296  |
| 64 | 16.12 | 16.14 | 33.8 | IPI:IPI00468653.3 | Gene_Symbol=Pccb Propionyl Coenzyme A carboxylase, beta polypeptide                                                                                     | 1.168175 | 0.224256 | 0.0211  |
| 65 | 16.11 | 16.11 | 24.9 | IPI:IPI00330523.1 | Gene_Symbol=Pcca Propionyl-CoA carboxylase alpha chain, mitochondrial                                                                                   | 1.03835  | 0.054293 | 0.2283  |
| 66 | 15.86 | 15.86 | 45.8 | IPI:IPI00320462.4 | Gene_Symbol=Bph1 Putative uncharacterized protein                                                                                                       | 1.034775 | 0.049317 | 0.38415 |
| 67 | 15.78 | 15.85 | 29.9 | IPI:IPI00881401.1 | Gene_Symbol=Cpt2 carnitine palmitoyltransferase 2                                                                                                       | 1.0996   | 0.136979 | 0.2824  |
| 68 | 15.7  | 15.71 | 17.9 | IPI:IPI00850737.1 | Gene_Symbol=Mut TIB-55 BB88 cDNA, RIKEN full-length enriched library, clone:I730049G19<br>product:methylmalonyl-Coenzyme A mutase, full insert sequence | 1.132475 | 0.179479 | 0.0554  |
| 69 | 15.68 | 15.69 | 35.8 | IPI:IPI00387379.1 | Gene_Symbol=Decr1 2,4-dienoyl-CoA reductase, mitochondrial                                                                                              | 0.9821   | -0.02606 | 0.3025  |
| 70 | 15.46 | 15.46 | 62.5 | IPI:IPI00623553.1 | Gene_Symbol=Atp5h<br>LOC100044492;ENSMUSG00000068706 hypothetical protein                                                                               | 0.969375 | -0.04487 | 0.3089  |
| 71 | 15.22 | 15.22 | 24.6 | IPI:IPI00113141.1 | Gene_Symbol=Cs Citrate synthase, mitochondrial                                                                                                          | 1.016025 | 0.022936 | 0.18755 |
| 72 | 15.08 | 15.08 | 30.9 | IPI:IPI00322760.7 | Gene_Symbol=Prodh proline dehydrogenase                                                                                                                 | 1.00915  | 0.013141 | 0.1901  |
| 73 | 14.93 | 14.93 | 44.1 | IPI:IPI00321718.4 | Gene_Symbol=Phb2 Prohibitin-2                                                                                                                           | 1.05535  | 0.077722 | 0.24995 |

|    |       |       |      |                   |                                                                                                                                        |          |          |             |
|----|-------|-------|------|-------------------|----------------------------------------------------------------------------------------------------------------------------------------|----------|----------|-------------|
| 74 | 14.83 | 14.83 | 30.4 | IPI:IPI00230540.1 | Gene_Symbol=Vdac1 Isoform Mt-VDAC1 of Voltage-dependent anion-selective channel protein 1                                              | 1.081625 | 0.1132   | 0.045       |
| 75 | 14.73 | 14.73 | 20.3 | IPI:IPI00316314.1 | Gene_Symbol=Hac1 2-hydroxyacyl-CoA lyase 1                                                                                             | 0.59585  | -0.74698 | 0.0288      |
| 76 | 14.68 | 14.68 | 32.8 | IPI:IPI00341282.2 | Gene_Symbol=Atp5f1 ATP synthase subunit b, mitochondrial                                                                               | 0.90935  | -0.13709 | 0.07345     |
| 77 | 14.61 | 14.61 | 32.5 | IPI:IPI00903424.1 | Gene_Symbol=Prss3 Adult male small intestine cDNA, RIKEN full-length enriched library, clone:2010010O17 product:Trypsinogen 16 homolog |          |          |             |
| 78 | 14.57 | 14.57 | 52.7 | IPI:IPI00117978.1 | Gene_Symbol=Cox4i1 Cytochrome c oxidase subunit 4 isoform 1, mitochondrial                                                             | 1.118625 | 0.161726 | 0.0431      |
| 79 | 14.55 | 14.56 | 40.5 | IPI:IPI00331692.1 | Gene_Symbol=Dci Putative uncharacterized protein                                                                                       | 1.0077   | 0.011066 | 0.5725      |
| 80 | 14.55 | 14.55 | 51.6 | IPI:IPI00118986.1 | Gene_Symbol=Atp5o;LOC100047429 ATP synthase subunit O, mitochondrial                                                                   | 1.029625 | 0.042119 | 0.263       |
| 81 | 14.49 | 14.53 | 76.2 | IPI:IPI00222419.5 | Gene_Symbol=ENSMUSG00000058927;Cycc Cytochrome c, somatic                                                                              | 1.154675 | 0.207487 | 0.15395     |
| 82 | 14.36 | 14.36 | 86.3 | IPI:IPI00263863.8 | Gene_Symbol=Hspe1 10 kDa heat shock protein, mitochondrial                                                                             | 1.112375 | 0.153643 | 0.36535     |
| 83 | 14.26 | 14.26 | 27   | IPI:IPI00132042.1 | Gene_Symbol=Pdhb Pyruvate dehydrogenase E1 component subunit beta, mitochondrial                                                       | 1.0619   | 0.086648 | 0.2868      |
| 84 | 14.13 | 14.13 | 17.7 | IPI:IPI00330747.2 | Gene_Symbol=Nphp3;Acad11 Acyl-CoA dehydrogenase family member 11                                                                       | 0.46935  | -1.09126 | 0.01775     |
| 85 | 14.01 | 14.01 | 24.1 | IPI:IPI00116192.1 | Gene_Symbol=Prdx3 Thioredoxin-dependent peroxide reductase, mitochondrial                                                              | 1.29105  | 0.368545 | 0.065733333 |
| 86 | 13.97 | 13.97 | 26.5 | IPI:IPI00230084.5 | Gene_Symbol=Aldh7a1 aldehyde dehydrogenase family 7, member A1 isoform a                                                               | 1.1818   | 0.240986 | 0.0133      |
| 87 | 13.75 | 13.75 | 28.1 | IPI:IPI00230108.6 | Gene_Symbol=Pdia3 Protein disulfide-isomerase A3                                                                                       | 0.70755  | -0.4991  | 0.003166667 |
| 88 | 13.7  | 13.7  | 20.6 | IPI:IPI00874456.1 | Gene_Symbol=Dld Dihydrolipoyl dehydrogenase, mitochondrial                                                                             | 1.084975 | 0.117662 | 0.323       |
| 89 | 13.32 | 13.32 | 20.2 | IPI:IPI00130804.1 | Gene_Symbol=Ech1 Delta(3,5)-Delta(2,4)-dienoyl-CoA isomerase, mitochondrial                                                            | 0.87595  | -0.19108 | 0.00585     |
| 90 | 13.12 | 13.47 | 28.8 | IPI:IPI00788331.1 | Gene_Symbol=Gcdh glutaryl-Coenzyme A dehydrogenase                                                                                     | 1.16455  | 0.219773 | 0.0444      |
| 91 | 13.1  | 13.1  | 26.5 | IPI:IPI00379694.4 | Gene_Symbol=Hmgcl 3-hydroxy-3-methylglutaryl-Coenzyme A lyase                                                                          | 1.01165  | 0.01671  | 0.4311      |
| 92 | 13.08 | 13.08 | 30.7 | IPI:IPI00321617.1 | Gene_Symbol=Ephx2 Isoform 1 of Epoxide hydrolase 2                                                                                     | 0.55255  | -0.85582 | 0.002325    |
| 93 | 13.05 | 13.05 | 58.6 | IPI:IPI00785410.1 | Gene_Symbol=Cox5b Cytochrome c oxidase subunit 5B, mitochondrial                                                                       | 1.027575 | 0.039244 | 0.2453      |

|     |       |       |      |                   |                                                                                                                                            |          |          |         |
|-----|-------|-------|------|-------------------|--------------------------------------------------------------------------------------------------------------------------------------------|----------|----------|---------|
| 94  | 12.97 | 13.37 | 15.1 | IPI:IPI00850133.1 | Gene_Symbol=Kiaa0564 (BLAST score:3792, P = 0.0)1300010F03Rik Isoform 1 of Uncharacterized protein KIAA0564 homolog                        | 0.91545  | -0.12745 | 0.459   |
| 95  | 12.9  | 12.9  | 28.6 | IPI:IPI00454008.1 | Gene_Symbol=Shmt2 Serine hydroxymethyltransferase                                                                                          | 1.165575 | 0.221042 | 0.0141  |
| 96  | 12.82 | 12.82 | 25.1 | IPI:IPI00134809.2 | Gene_Symbol=Dlst Isoform 1 of Dihydropyridine-residue succinyltransferase component of 2-oxoglutarate dehydrogenase complex, mitochondrial | 1.096975 | 0.133531 | 0.0641  |
| 97  | 12.52 | 12.52 | 21.4 | IPI:IPI00776047.1 | Gene_Symbol=Aifm1 Apoptosis-inducing factor, mitochondrion-associated 1                                                                    | 1.103425 | 0.141989 | 0.115   |
| 98  | 12.51 | 12.66 | 25.3 | IPI:IPI00119685.1 | Gene_Symbol=Cyp27a1 Cytochrome P450 27, mitochondrial                                                                                      | 1.04445  | 0.062743 | 0.2129  |
| 99  | 12.48 | 12.48 | 41.7 | IPI:IPI00890322.1 | Gene_Symbol=Bdh1 3-hydroxybutyrate dehydrogenase, type 1                                                                                   | 0.859925 | -0.21772 | 0.0016  |
| 100 | 12.38 | 12.38 | 34   | IPI:IPI00121833.3 | Gene_Symbol=Acaa1b;Acaa1a 3-ketoacyl-CoA thiolase A, peroxisomal                                                                           |          |          |         |
| 101 | 12.33 | 14.73 | 45.6 | IPI:IPI00624210.3 | Gene_Symbol=Glyal (BLAST score 619, P = 1e-176) EG240549 Glycine N-acyltransferase-like protein                                            | 1.075975 | 0.105645 | 0.1511  |
| 102 | 12.33 | 12.35 | 37.2 | IPI:IPI00338536.1 | Gene_Symbol=Sdhb Succinate dehydrogenase [ubiquinone] iron-sulfur subunit, mitochondrial                                                   | 1.1639   | 0.218967 | 0.0098  |
| 103 | 12.21 | 12.21 | 41.6 | IPI:IPI00121051.3 | Gene_Symbol=Gstk1 Glutathione S-transferase kappa 1                                                                                        | 0.808775 | -0.30619 | 0.0095  |
| 104 | 12.19 | 12.19 | 27.2 | IPI:IPI00273146.1 | Gene_Symbol=Chdh Choline dehydrogenase, mitochondrial                                                                                      | 1.13735  | 0.185676 | 0.0628  |
| 105 | 12.02 | 12.02 | 36   | IPI:IPI00875110.1 | Gene_Symbol=Idh2 52 kDa protein                                                                                                            | 0.92855  | -0.10695 | 0.4098  |
| 106 | 12.02 | 12.02 | 36.4 | IPI:IPI00776084.1 | Gene_Symbol=Atp5c1 ATP synthase gamma chain                                                                                                | 1.03985  | 0.056375 | 0.3318  |
| 107 | 11.74 | 11.75 | 43.2 | IPI:IPI00109109.1 | Gene_Symbol=Sod2 Superoxide dismutase [Mn], mitochondrial                                                                                  | 1.230175 | 0.298864 | 0.00595 |
| 108 | 11.46 | 11.46 | 35.6 | IPI:IPI00115824.1 | Gene_Symbol=Nipsnap1 Protein NipSnap homolog 1                                                                                             | 1.138575 | 0.187229 | 0.23375 |
| 109 | 11.46 | 11.46 | 64.9 | IPI:IPI00555000.2 | Gene_Symbol=Uqcrb Cytochrome b-c1 complex subunit 7                                                                                        | 1.171175 | 0.227957 | 0.01305 |
| 110 | 11.22 | 11.22 | 22.4 | IPI:IPI00122547.1 | Gene_Symbol=Vdac2 Voltage-dependent anion-selective channel protein 2                                                                      | 1.1011   | 0.138945 | 0.18995 |
| 111 | 11.15 | 11.15 | 27.3 | IPI:IPI00319992.1 | Gene_Symbol=Hspa5 78 kDa glucose-regulated protein                                                                                         | 0.66245  | -0.59412 | 0.017   |
| 112 | 11.1  | 11.11 | 16.1 | IPI:IPI00131695.3 | Gene_Symbol=Alb Serum albumin                                                                                                              | 0.6191   | -0.69176 | 0.01265 |
| 113 | 11.02 | 11.11 | 18.3 | IPI:IPI00123276.1 | Gene_Symbol=Mosc2 MOSC domain-containing protein 2, mitochondrial                                                                          | 0.89825  | -0.15481 | 0.1095  |

|     |       |       |      |                   |                                                                                                                           |          |          |          |
|-----|-------|-------|------|-------------------|---------------------------------------------------------------------------------------------------------------------------|----------|----------|----------|
| 114 | 10.98 | 10.98 | 54.6 | IPI:IPI00125460.1 | Gene_Symbol=Atp5j;LOC674583 ATP synthase-coupling factor 6, mitochondrial                                                 | 1.0838   | 0.116099 | 0.2739   |
| 115 | 10.88 | 10.88 | 23.8 | IPI:IPI00653598.2 | Gene_Symbol=Uqcrc1 ubiquinol-cytochrome c reductase core protein 1                                                        | 1.118    | 0.16092  | 0.0111   |
| 116 | 10.77 | 10.77 | 55.2 | IPI:IPI00230113.5 | Gene_Symbol=Cyb5 Cytochrome b5                                                                                            | 0.59435  | -0.75062 | 0.0061   |
| 117 | 10.64 | 10.64 | 19.3 | IPI:IPI00387289.3 | Gene_Symbol=Ces3 Carboxylesterase 3                                                                                       | 0.49915  | -1.00245 | 0.0284   |
| 118 | 10.19 | 10.19 | 27.1 | IPI:IPI00113517.1 | Gene_Symbol=Ctsb Cathepsin B                                                                                              | 0.7455   | -0.42372 | 0.0281   |
| 119 | 10.17 | 10.17 | 27.6 | IPI:IPI00153660.4 | Gene_Symbol=Dlat Dihydrolipoyllysine-residue acetyltransferase component of pyruvate dehydrogenase complex, mitochondrial | 0.965325 | -0.05091 | 0.2403   |
| 120 | 10.12 | 10.13 | 17.5 | IPI:IPI00134870.3 | Gene_Symbol=Acox2 Peroxisomal acyl-coenzyme A oxidase 2                                                                   | 0.5546   | -0.85048 | 0.0518   |
| 121 | 10.09 | 10.09 | 20.9 | IPI:IPI00742309.1 | Gene_Symbol=Kmo Isoform 2 of Kynurenine 3-monooxygenase                                                                   | 1.106625 | 0.146166 | 0.4378   |
| 122 | 10.01 | 12.03 | 21.9 | IPI:IPI00874350.1 | Gene_Symbol=Aldh3a2 Putative uncharacterized protein                                                                      | 0.56135  | -0.83303 | 0.003025 |
| 123 | 10    | 10    | 42.9 | IPI:IPI00754739.1 | Gene_Symbol=Chchd3 (BLAST score: 332, P= 5e-90)LOC100046321;Chchd3 Putative uncharacterized protein                       | 0.999925 | -0.00011 | 0.2147   |
| 124 | 10    | 10    | 24.9 | IPI:IPI00169862.1 | Gene_Symbol=Coq9 Ubiquinone biosynthesis protein COQ9, mitochondrial                                                      | 1.10145  | 0.139404 | 0.29055  |
| 125 | 9.9   | 9.9   | 23.3 | IPI:IPI00318750.4 | Gene_Symbol=Dhrs4 NADPH-dependent retinol dehydrogenase/reductase isoform 1                                               | 0.6306   | -0.6652  | NA       |
| 126 | 9.7   | 9.7   | 19.3 | IPI:IPI00314202.5 | Gene_Symbol=Baat Bile acid-CoA:amino acid N-acyltransferase                                                               | 0.61345  | -0.70498 | NA       |
| 127 | 9.52  | 9.53  | 22.5 | IPI:IPI00884472.1 | Gene_Symbol=Ctsh cathepsin H preproprotein                                                                                | 0.859225 | -0.21889 | 0.03705  |
| 128 | 9.51  | 9.51  | 21.3 | IPI:IPI00130460.1 | Gene_Symbol=Ndufv1 NADH dehydrogenase [ubiquinone] flavoprotein 1, mitochondrial                                          | 1.0734   | 0.102188 | 0.0523   |
| 129 | 9.4   | 9.41  | 60.5 | IPI:IPI00131771.3 | Gene_Symbol=Cox6c Cytochrome c oxidase polypeptide VIc                                                                    | 1.048025 | 0.067673 | NA       |
| 130 | 9.34  | 9.34  | 37.2 | IPI:IPI00785323.1 | Gene_Symbol=Cyp2e1 Cytochrome P450 2E1                                                                                    | 0.628475 | -0.67007 | 0.0797   |
| 131 | 9.32  | 9.32  | 23.3 | IPI:IPI00331555.2 | Gene_Symbol=Bckdha branched chain ketoacid dehydrogenase E1, alpha polypeptide                                            | 1.160725 | 0.215026 | 0.006    |
| 132 | 9.31  | 9.31  | 41.7 | IPI:IPI00133034.3 | Gene_Symbol=Hint2 Histidine triad nucleotide-binding protein 2                                                            | 1.0788   | 0.109427 | 0.0778   |
| 133 | 9.23  | 9.23  | 35.3 | IPI:IPI00133006.1 | Gene_Symbol=Ndufab1 Acyl carrier protein, mitochondrial                                                                   | 1.048975 | 0.06898  | 0.1125   |

|     |      |      |      |                   |                                                                                                           |          |          |         |
|-----|------|------|------|-------------------|-----------------------------------------------------------------------------------------------------------|----------|----------|---------|
| 134 | 9.14 | 9.14 | 70.9 | IPI:IPI00225390.5 | Gene_Symbol=Cox6b1 Cytochrome c oxidase subunit VIb isoform 1                                             | 1.13155  | 0.1783   | NA      |
| 135 | 8.91 | 8.91 | 26.1 | IPI:IPI00874482.1 | Gene_Symbol=Actg1 Actin, cytoplasmic 2                                                                    | 0.814075 | -0.29677 | 0.0008  |
| 136 | 8.78 | 8.78 | 31.8 | IPI:IPI00319652.2 | Gene_Symbol=Gpx1 Glutathione peroxidase 1                                                                 | 1.04715  | 0.066468 | 0.2622  |
| 137 | 8.76 | 8.76 | 22.6 | IPI:IPI00134691.3 | Gene_Symbol=Ugt1a2;Ugt1a9;Ugt1a10;Ugt1a1;Ugt1a5;Ugt1a7c;LOC632297;Ugt1a6b UDP-glucuronosyltransferase 1-1 | 0.8434   | -0.24571 | NA      |
| 138 | 8.72 | 8.72 | 33.7 | IPI:IPI00830581.1 | Gene_Symbol=Hsd17b10 hydroxyacyl-Coenzyme A dehydrogenase type II                                         | 1.210725 | 0.275871 | 0.10945 |
| 139 | 8.62 | 9.06 | 16   | IPI:IPI00128738.4 | Gene_Symbol=Agxt2 Alanine--glyoxylate aminotransferase 2, mitochondrial                                   | 1.052075 | 0.073238 | 0.28925 |
| 140 | 8.41 | 11.2 | 32.6 | IPI:IPI00113073.3 | Gene_Symbol=Aldh1b1 Aldehyde dehydrogenase X, mitochondrial                                               | 1.4719   | 0.55768  | NA      |
| 141 | 8.35 | 8.42 | 10.6 | IPI:IPI00761408.2 | Gene_Symbol=Lonp1 Lon protease homolog, mitochondrial                                                     | 1.095575 | 0.131688 | 0.0203  |
| 142 | 8.29 | 8.29 | 29.5 | IPI:IPI00117083.1 | Gene_Symbol=Grpel1 GrpE protein homolog 1, mitochondrial                                                  | 1.301625 | 0.380314 | NA      |
| 143 | 8.27 | 8.52 | 27.4 | IPI:IPI00407499.1 | Gene_Symbol=Abat Isoform 1 of 4-aminobutyrate aminotransferase, mitochondrial                             | 1.016975 | 0.024284 | 0.6185  |
| 144 | 8.22 | 8.38 | 13.5 | IPI:IPI00895390.1 | Gene_Symbol=Scpep1 Serine carboxypeptidase 1                                                              | 0.8961   | -0.15827 | 0.0603  |
| 145 | 8.16 | 8.54 | 16.8 | IPI:IPI00153144.3 | Gene_Symbol=Suox Sulfite oxidase, mitochondrial                                                           | 1.038425 | 0.054397 | NA      |
| 146 | 8.16 | 8.16 | 29.6 | IPI:IPI00116222.1 | Gene_Symbol=Hibadh 3-hydroxyisobutyrate dehydrogenase, mitochondrial                                      | 0.909675 | -0.13658 | 0.03495 |
| 147 | 8.06 | 8.08 | 13.3 | IPI:IPI00759881.1 | Gene_Symbol=Acad9 very-long-chain acyl-CoA dehydrogenase VLCAD homolog                                    | 1.0421   | 0.059494 | 0.01    |
| 148 | 8.01 | 8.01 | 31.8 | IPI:IPI00406442.2 | Gene_Symbol=Suclg1 Succinyl-CoA ligase [GDP-forming] subunit alpha, mitochondrial                         | 1.0708   | 0.098689 | 0.1244  |
| 149 | 8    | 8    | 34.8 | IPI:IPI00896110.1 | Gene_Symbol=Prdx5 Prdx5 protein                                                                           | 1.0364   | 0.051581 | 0.2797  |
| 150 | 8    | 8    | 60.2 | IPI:IPI00128346.1 | Gene_Symbol=Cisd1 CDGSH iron sulfur domain-containing protein 1                                           | 0.8347   | -0.26067 | 0.0346  |
| 151 | 8    | 8    | 22.8 | IPI:IPI00120212.1 | Gene_Symbol=Ndufa9 NADH dehydrogenase [ubiquinone] 1 alpha subcomplex subunit 9, mitochondrial            | 0.955425 | -0.06579 | 0.0469  |
| 152 | 8    | 8    | 17.9 | IPI:IPI00125220.6 | Gene_Symbol=Ctsz Cathepsin Z                                                                              | 1.15075  | 0.202574 | 0.0835  |
| 153 | 7.93 | 7.93 | 21.9 | IPI:IPI00125853.1 | Gene_Symbol=Slc25a15 Mitochondrial ornithine transporter 1                                                | 1.2672   | 0.341644 | 0.10435 |
| 154 | 7.87 | 8    | 13   | IPI:IPI00420706.4 | Gene_Symbol=Lrprrc Leucine-rich PPR motif-containing protein, mitochondrial                               | 0.9884   | -0.01683 | 0.9169  |

|     |      |      |      |                   |                                                                                                                                                                               |          |          |         |
|-----|------|------|------|-------------------|-------------------------------------------------------------------------------------------------------------------------------------------------------------------------------|----------|----------|---------|
| 155 | 7.7  | 7.7  | 46.3 | IPI:IPI00125929.2 | Gene_Symbol=Ndufa4 NADH dehydrogenase [ubiquinone] 1 alpha subcomplex subunit 4                                                                                               | 1.1336   | 0.180912 | 0.0184  |
| 156 | 7.68 | 7.7  | 21.8 | IPI:IPI00132762.1 | Gene_Symbol=Trap1 Heat shock protein 75 kDa, mitochondrial                                                                                                                    | 1.0035   | 0.005041 | 0.0554  |
| 157 | 7.65 | 7.65 | 21.2 | IPI:IPI00331436.4 | Gene_Symbol=Lap3 Isoform 1 of Cytosol aminopeptidase                                                                                                                          |          |          |         |
| 158 | 7.26 | 7.26 | 65.5 | IPI:IPI00130322.5 | Gene_Symbol=Ndufa7 NADH dehydrogenase [ubiquinone] 1 alpha subcomplex subunit 7                                                                                               | 1.1324   | 0.179384 | 0.5075  |
| 159 | 7.19 | 7.21 | 22.8 | IPI:IPI00877214.1 | Gene_Symbol=Peci peroxisomal delta3, delta2-enoyl-Coenzyme A isomerase isoform a                                                                                              | 0.74095  | -0.43255 | 0.0011  |
| 160 | 7    | 7    | 13.8 | IPI:IPI00130627.1 | Gene_Symbol=Lgmn Legumain                                                                                                                                                     | 0.936025 | -0.09538 | 0.4182  |
| 161 | 7    | 7    | 31.3 | IPI:IPI00831055.2 | Gene_Symbol=- Beta-globin                                                                                                                                                     |          |          |         |
| 162 | 6.93 | 7.53 | 10.4 | IPI:IPI00221556.2 | Gene_Symbol=Acsm5 Isoform 1 of Acyl-coenzyme A synthetase ACSM5, mitochondrial                                                                                                | 1.029475 | 0.041909 | 0.2036  |
| 163 | 6.77 | 6.82 | 23.8 | IPI:IPI00895177.1 | Gene_Symbol=Cyb5r3 13 days embryo liver cDNA, RIKEN full-length enriched library, clone:2500002N19 product:NADH-CYTOCHROME B5 REDUCTASE homolog                               | 0.932    | -0.1016  | 0.09785 |
| 164 | 6.65 | 6.65 | 19.7 | IPI:IPI00132728.2 | Gene_Symbol=Cyc1 Isoform 1 of Cytochrome c1, heme protein, mitochondrial                                                                                                      | 1.002925 | 0.004214 | 0.3792  |
| 165 | 6.61 | 6.62 | 20.8 | IPI:IPI00116748.1 | Gene_Symbol=Ndufa10 NADH dehydrogenase [ubiquinone] 1 alpha subcomplex subunit 10, mitochondrial                                                                              | 1.144425 | 0.194623 | 0.153   |
| 166 | 6.57 | 6.57 | 43.2 | IPI:IPI00271986.6 | Gene_Symbol=Atp5j2 ATP synthase subunit f, mitochondrial                                                                                                                      | 1.136775 | 0.184947 | NA      |
| 167 | 6.55 | 6.55 | 9.5  | IPI:IPI00110843.3 | Gene_Symbol=Agmat Agmatinase, mitochondrial                                                                                                                                   | 1.0844   | 0.116897 | NA      |
| 168 | 6.52 | 6.52 | 15.1 | IPI:IPI00850430.1 | Gene_Symbol=Slc25a3 LOC100046151 similar to Solute carrier family 25 (mitochondrial carrier, phosphate carrier), member 3                                                     | 1.05935  | 0.083179 | NA      |
| 169 | 6.42 | 6.42 | 26.7 | IPI:IPI00337893.2 | Gene_Symbol=Pdha1 Pyruvate dehydrogenase E1 component subunit alpha, somatic form, mitochondrial                                                                              | 0.9875   | -0.01815 | 0.1327  |
| 170 | 6.28 | 6.28 | 17   | IPI:IPI00276926.3 | Gene_Symbol=Slc25a1 NOD-derived CD11c +ve dendritic cells cDNA, RIKEN full-length enriched library, clone:F630026H16 product:solute carrier family 25 (mitochondrial carrier) | 1.157575 | 0.211106 | 0.0369  |
| 171 | 6.25 | 6.41 | 7.8  | IPI:IPI00845652.1 | Gene_Symbol=Ogdh Isoform 3 of 2-oxoglutarate dehydrogenase E1 component, mitochondrial                                                                                        | 1.0916   | 0.126444 | 0.066   |

|     |      |      |      |                   |                                                                                                                                                               |          |          |          |
|-----|------|------|------|-------------------|---------------------------------------------------------------------------------------------------------------------------------------------------------------|----------|----------|----------|
| 172 | 6.25 | 6.25 | 28.1 | IPI:IPI00125325.1 | Gene_Symbol=Decr2 Peroxisomal 2,4-dienoyl-CoA reductase                                                                                                       | 0.5281   | -0.92112 | 0.023775 |
| 173 | 6.24 | 6.24 | 48.7 | IPI:IPI00135857.3 | Gene_Symbol=Sod1 (BLAST score 313, P = 3e-84)<br>EG667310;LOC545845 hypothetical protein isoform 4                                                            | 0.796675 | -0.32794 | 0.003525 |
| 174 | 6.18 | 6.18 | 21.8 | IPI:IPI00753303.2 | Gene_Symbol=Dapal (BLAST score: 644, P = 0.0)<br>0610010D20Rik Dihydrodipicolinate synthase-like, mitochondrial                                               | 1.0744   | 0.103531 | 0.3263   |
| 175 | 6.13 | 6.13 | 17.8 | IPI:IPI00553717.6 | Gene_Symbol=Mccc2 Methylcrotonoyl-CoA carboxylase beta chain, mitochondrial                                                                                   | 1.130025 | 0.176355 | 0.1158   |
| 176 | 6.07 | 6.07 | 13.2 | IPI:IPI00136655.1 | Gene_Symbol=Gcat 2-amino-3-ketobutyrate coenzyme A ligase, mitochondrial                                                                                      | 1.08005  | 0.111098 | 0.303    |
| 177 | 6.03 | 6.03 | 14.4 | IPI:IPI00400301.2 | Gene_Symbol=Cpox Coproporphyrinogen III oxidase, mitochondrial                                                                                                | 1.10195  | 0.140059 | 0.1316   |
| 178 | 6.02 | 6.02 | 13.1 | IPI:IPI00330094.4 | Gene_Symbol=Cpt1a Carnitine O-palmitoyltransferase I, liver isoform                                                                                           | 0.996625 | -0.00488 | 0.064    |
| 179 | 6.02 | 6.02 | 15.4 | IPI:IPI00126635.1 | Gene_Symbol=Idh3b Tumor-related protein                                                                                                                       | 0.937575 | -0.09299 | 0.28695  |
| 180 | 6.01 | 6.06 | 18.6 | IPI:IPI00459725.2 | Gene_Symbol=Idh3a Isoform 1 of Isocitrate dehydrogenase [NAD] subunit alpha, mitochondrial                                                                    | 1.007225 | 0.010386 | 0.7508   |
| 181 | 6    | 6    | 12.3 | IPI:IPI00131177.1 | Gene_Symbol=Letm1 LETM1 and EF-hand domain-containing protein 1, mitochondrial                                                                                | 0.92685  | -0.10959 | 0.04955  |
| 182 | 6    | 6    | 12.9 | IPI:IPI00117214.3 | Gene_Symbol=Hsd12 Hydroxysteroid dehydrogenase-like protein 2                                                                                                 | 0.7485   | -0.41793 | 0.0071   |
| 183 | 6    | 6    | 23.2 | IPI:IPI00453777.2 | Gene_Symbol=Atp5d ATP synthase subunit delta, mitochondrial                                                                                                   | 1.05485  | 0.077038 | 0.0439   |
| 184 | 6    | 6    | 6.5  | IPI:IPI00321190.1 | Gene_Symbol=Psap Sulfated glycoprotein 1                                                                                                                      | 0.811425 | -0.30147 | NA       |
| 185 | 6    | 6    | 13.1 | IPI:IPI00170307.1 | Gene_Symbol=Apoa1bp Apolipoprotein A-I-binding protein                                                                                                        | 1.0437   | 0.061707 | 0.2709   |
| 186 | 6    | 6    | 26.2 | IPI:IPI00132799.4 | Gene_Symbol=C1qbp complement component 1, q subcomponent binding protein                                                                                      |          |          |          |
| 187 | 6    | 6    | 42.1 | IPI:IPI00134484.1 | Gene_Symbol=Timm10;Timm13 Mitochondrial import inner membrane translocase subunit Tim13                                                                       | 1.2218   | 0.289008 | 0.0531   |
| 188 | 5.7  | 5.7  | 44.5 | IPI:IPI00881750.1 | Gene_Symbol=Ndufb5 14 kDa protein                                                                                                                             | 1.032325 | 0.045897 | 0.0507   |
| 189 | 5.52 | 5.52 | 59.2 | IPI:IPI00886222.1 | Gene_Symbol=Ndufs6 11 kDa protein                                                                                                                             | 1.092375 | 0.127468 | 0.0637   |
| 190 | 5.5  | 5.5  | 27.3 | IPI:IPI00607025.2 | Gene_Symbol=Amacr 13 days embryo liver cDNA, RIKEN full-length enriched library, clone:2510003N10 product:alpha-methylacyl-CoA racemase, full insert sequence | 0.8017   | -0.31887 | NA       |

|     |      |      |      |                   |                                                                                                                                                                                                 |          |          |         |
|-----|------|------|------|-------------------|-------------------------------------------------------------------------------------------------------------------------------------------------------------------------------------------------|----------|----------|---------|
| 191 | 5.44 | 5.44 | 23.3 | IPI:IPI00131584.1 | Gene_Symbol=Slc25a20 Mitochondrial carnitine/acylcarnitine carrier protein                                                                                                                      | 1.0216   | 0.03083  | NA      |
| 192 | 5.4  | 5.4  | 38.6 | IPI:IPI00120451.1 | Gene_Symbol=Fabp1 Fatty acid-binding protein, liver                                                                                                                                             | 0.5406   | -0.88737 | 0.0769  |
| 193 | 5.34 | 5.45 | 48.6 | IPI:IPI00120719.4 | Gene_Symbol=Cox5a Cytochrome c oxidase subunit 5A, mitochondrial                                                                                                                                | 1.129225 | 0.175333 | 0.25645 |
| 194 | 5.32 | 5.32 | 13.9 | IPI:IPI00123639.1 | Gene_Symbol=Calr Calreticulin                                                                                                                                                                   |          |          |         |
| 195 | 5.26 | 5.35 | 25.4 | IPI:IPI00169925.2 | Gene_Symbol=Ndufv2 Isoform 1 of NADH dehydrogenase [ubiquinone] flavoprotein 2, mitochondrial                                                                                                   | 0.985975 | -0.02038 | 0.0362  |
| 196 | 5.22 | 5.22 | 12.5 | IPI:IPI00760085.1 | Gene_Symbol=Agxt Isoform Peroxisomal of Serine--pyruvate aminotransferase, mitochondrial                                                                                                        | 0.79165  | -0.33707 | NA      |
| 197 | 5.01 | 5.01 | 11.2 | IPI:IPI00461197.1 | Gene_Symbol=Ldhd 10 days neonate skin cDNA, RIKEN full-length enriched library, clone:4733401P21 product:weakly similar to PUTATIVE D-LACTATE DEHYDROGENASE (CYTOCHROME) OXIDOREDUCTASE PROTEIN | 1.5385   | 0.621524 | NA      |
| 198 | 5    | 5    | 19.1 | IPI:IPI00894832.1 | Gene_Symbol=Ctsc Adult male kidney cDNA, RIKEN full-length enriched library, clone:0610010C21 product:cathepsin C, full insert sequence                                                         | 0.984275 | -0.02287 | NA      |
| 199 | 4.96 | 4.96 | 8.7  | IPI:IPI00124372.3 | Gene_Symbol=Aldh9a1 aldehyde dehydrogenase 9, subfamily A1                                                                                                                                      | 0.9621   | -0.05574 | 0.1781  |
| 200 | 4.92 | 4.92 | 29   | IPI:IPI00387430.1 | Gene_Symbol=Ndufb8 NADH dehydrogenase [ubiquinone] 1 beta subcomplex subunit 8, mitochondrial                                                                                                   | 1.144825 | 0.195127 | NA      |
| 201 | 4.92 | 4.92 | 27.6 | IPI:IPI00378120.2 | Gene_Symbol=Glrx5 Glutaredoxin-related protein 5                                                                                                                                                | 1.18285  | 0.242267 | NA      |
| 202 | 4.9  | 4.93 | 24.9 | IPI:IPI00895984.1 | Gene_Symbol=Mup1 Major urinary protein 1                                                                                                                                                        | 0.495375 | -1.01341 | NA      |
| 203 | 4.8  | 4.8  | 4.7  | IPI:IPI00271951.5 | Gene_Symbol=Pdia4 protein disulfide isomerase associated 4                                                                                                                                      |          |          |         |
| 204 | 4.58 | 4.58 | 10.8 | IPI:IPI00658539.1 | Gene_Symbol=Ctsa cathepsin A isoform a                                                                                                                                                          | 1.347875 | 0.430687 | NA      |
| 205 | 4.57 | 4.57 | 14.6 | IPI:IPI00265352.1 | Gene_Symbol=Gpt2 Alanine aminotransferase 2                                                                                                                                                     | 1.23005  | 0.298717 | 0.2485  |
| 206 | 4.55 | 4.55 | 36   | IPI:IPI00120984.5 | Gene_Symbol=Ndufa8 NADH dehydrogenase [ubiquinone] 1 alpha subcomplex subunit 8                                                                                                                 | 1.171725 | 0.228634 | NA      |
| 207 | 4.55 | 4.55 | 54.9 | IPI:IPI00224210.5 | Gene_Symbol=Uqcrcq Cytochrome b-c1 complex subunit 8                                                                                                                                            | 0.98595  | -0.02041 | NA      |
| 208 | 4.53 | 4.57 | 13   | IPI:IPI00129526.1 | Gene_Symbol=Hsp90b1 Endoplasmin                                                                                                                                                                 |          |          |         |



|     |      |      |      |                   |                                                                                                                                                                                                             |          |          |        |
|-----|------|------|------|-------------------|-------------------------------------------------------------------------------------------------------------------------------------------------------------------------------------------------------------|----------|----------|--------|
| 209 | 4.5  | 4.54 | 28.5 | IPI:IPI00652845.3 | Gene_Symbol=Pecr In vitro fertilized eggs cDNA, RIKEN full-length enriched library, clone:7420405J16 product:peroxisomal trans-2-enoyl-CoA reductase, full insert sequence                                  |          |          |        |
| 210 | 4.49 | 4.49 | 22.7 | IPI:IPI00874574.1 | Gene_Symbol=Clybl 36 kDa protein                                                                                                                                                                            |          |          |        |
| 211 | 4.36 | 7.88 | 16.7 | IPI:IPI00875511.1 | Gene_Symbol=Mosc1 MOCO sulphurase C-terminal domain containing 1                                                                                                                                            |          |          |        |
| 212 | 4.36 | 4.36 | 17.3 | IPI:IPI00648829.1 | Gene_Symbol=Nipsnap3a Nipsnap homolog 3A                                                                                                                                                                    | 1.11605  | 0.158402 | NA     |
| 213 | 4.3  | 4.31 | 14.6 | IPI:IPI00320850.3 | Gene_Symbol=Mccc1 Methylcrotonoyl-CoA carboxylase subunit alpha, mitochondrial                                                                                                                              | 0.975875 | -0.03523 | 0.5973 |
| 214 | 4.25 | 4.69 | 8.3  | IPI:IPI00751137.1 | Gene_Symbol=Tomm70a Adult male thymus cDNA, RIKEN full-length enriched library, clone:5830412L10 product:Mitochondrial proteins import receptor (Translocase of outer membrane TOM70), full insert sequence | 0.8459   | -0.24144 | NA     |
| 215 | 4.23 | 4.23 | 19.1 | IPI:IPI00133270.1 | Gene_Symbol=Clpp Putative ATP-dependent Clp protease proteolytic subunit, mitochondrial                                                                                                                     | 1.272225 | 0.347354 | 0.0201 |
| 216 | 4.17 | 4.17 | 18.3 | IPI:IPI00120232.1 | Gene_Symbol=Ndufs7 NADH dehydrogenase [ubiquinone] iron-sulfur protein 7, mitochondrial                                                                                                                     | 0.982725 | -0.02514 | NA     |
| 217 | 4.16 | 4.2  | 7.4  | IPI:IPI00621548.2 | Gene_Symbol=Por NADPH--cytochrome P450 reductase                                                                                                                                                            | 0.877625 | -0.18832 | NA     |
| 218 | 4.15 | 6.15 | 10.8 | IPI:IPI00153143.1 | Gene_Symbol=Ugt2b1 UDP glucuronosyltransferase 2 family, polypeptide B1                                                                                                                                     | 0.62895  | -0.66898 | 0.0875 |
| 219 | 4.15 | 4.15 | 14.6 | IPI:IPI00762346.1 | Gene_Symbol=Aadat Kynurenine/alpha-aminoadipate aminotransferase mitochondrial                                                                                                                              | 0.99825  | -0.00253 | NA     |
| 220 | 4.11 | 4.13 | 20.1 | IPI:IPI00133240.1 | Gene_Symbol=Uqcrfs1 Cytochrome b-c1 complex subunit Rieske, mitochondrial                                                                                                                                   | 0.98845  | -0.01676 | NA     |
| 221 | 4.1  | 4.1  | 25.7 | IPI:IPI00230715.5 | Gene_Symbol=Ndufa13 NADH dehydrogenase [ubiquinone] 1 alpha subcomplex subunit 13                                                                                                                           | 1.008525 | 0.012247 | NA     |
| 222 | 4.09 | 4.17 | 23.6 | IPI:IPI00119945.1 | Gene_Symbol=Nit2 Nitrilase homolog 2                                                                                                                                                                        | 0.954675 | -0.06692 | NA     |
| 223 | 4.07 | 4.07 | 17.9 | IPI:IPI00170093.3 | Gene_Symbol=Ndufs8 NADH dehydrogenase [ubiquinone] iron-sulfur protein 8, mitochondrial                                                                                                                     | 1.109475 | 0.149877 | NA     |
| 224 | 4.03 | 4.03 | 43   | IPI:IPI00880613.1 | Gene_Symbol=Ndufb10 18 kDa protein                                                                                                                                                                          | 0.99735  | -0.00383 | NA     |
| 225 | 4.03 | 4.03 | 33   | IPI:IPI00132623.3 | Gene_Symbol=Ndufb9 NADH dehydrogenase [ubiquinone] 1 beta subcomplex subunit 9                                                                                                                              | 1.1296   | 0.175812 | 0.2409 |
| 226 | 4.02 | 4.02 | 27.1 | IPI:IPI00133284.1 | Gene_Symbol=D10Jhu81e;LOC100046684 ES1 protein homolog, mitochondrial                                                                                                                                       | 1.146675 | 0.197457 | 0.0693 |
| 227 | 4    | 10.6 | 12.6 | IPI:IPI00759953.1 | Gene_Symbol=1810049H19Rik;Try4 Tesp4 protein                                                                                                                                                                |          |          |        |

|     |      |      |                        |                                                                                                                                                                                        |          |          |         |
|-----|------|------|------------------------|----------------------------------------------------------------------------------------------------------------------------------------------------------------------------------------|----------|----------|---------|
| 228 | 4    | 4.01 | 8.2 IPI:IPI00128287.1  | Gene_Symbol=Cyp1a2 Cytochrome P450 1A2                                                                                                                                                 | 0.5516   | -0.85831 | 0.0184  |
| 229 | 4    | 4    | 7.1 IPI:IPI00127267.4  | Gene_Symbol=Gldc Glycine dehydrogenase<br>[decarboxylating], mitochondrial                                                                                                             | 1.27705  | 0.352815 | 0.0261  |
| 230 | 4    | 4    | 14.3 IPI:IPI00881534.1 | Gene_Symbol=Ppa2 38 kDa protein                                                                                                                                                        |          |          |         |
| 231 | 4    | 4    | 12.2 IPI:IPI00831119.1 | Gene_Symbol=Lypla1 21 kDa protein                                                                                                                                                      | 0.9175   | -0.12422 | NA      |
| 232 | 4    | 4    | 22.7 IPI:IPI00125776.1 | Gene_Symbol=ENSMUSG00000045455;Timm8a1<br>Mitochondrial import inner membrane translocase<br>subunit Tim8 A                                                                            | 1.070125 | 0.097779 | 0.0518  |
| 233 | 3.99 | 3.99 | 18 IPI:IPI00129963.1   | Gene_Symbol=Phyh Phytanoyl-CoA dioxygenase,<br>peroxisomal                                                                                                                             | 0.56915  | -0.81312 | NA      |
| 234 | 3.95 | 3.95 | 10.3 IPI:IPI00828822.2 | Gene_Symbol=Es31 Isoform 2 of Liver carboxylesterase<br>31                                                                                                                             | 0.610425 | -0.71211 | NA      |
| 235 | 3.86 | 3.86 | 25.8 IPI:IPI00230754.5 | Gene_Symbol=Slc25a11 Mitochondrial 2-<br>oxoglutarate/malate carrier protein                                                                                                           | 1.08035  | 0.111499 | NA      |
| 236 | 3.81 | 3.86 | 15.1 IPI:IPI00273164.1 | Gene_Symbol=Aldh5a1 Succinate-semialdehyde<br>dehydrogenase, mitochondrial                                                                                                             | 1.0085   | 0.012211 | 0.3859  |
| 237 | 3.7  | 3.7  | 29.1 IPI:IPI00875372.1 | Gene_Symbol=Echdc2 Isoform 2 of Enoyl-CoA<br>hydratase domain-containing protein 2, mitochondrial                                                                                      | 1.290375 | 0.36779  | NA      |
| 238 | 3.7  | 3.7  | 24.9 IPI:IPI00125267.4 | Gene_Symbol=Vapa Vesicle-associated membrane<br>protein-associated protein A                                                                                                           | 0.4726   | -1.08131 | NA      |
| 239 | 3.62 | 3.62 | 22.2 IPI:IPI00130640.5 | Gene_Symbol=Hrsp12 Ribonuclease UK114                                                                                                                                                  | 0.800925 | -0.32026 | NA      |
| 240 | 3.52 | 3.52 | 6.2 IPI:IPI00606097.1  | Gene_Symbol=Tmprss13 transmembrane protease,<br>serine 13                                                                                                                              | 0.988775 | -0.01629 | 0.142   |
| 241 | 3.44 | 3.44 | 7.7 IPI:IPI00554830.2  | Gene_Symbol=Gulo L-gulonolactone oxidase                                                                                                                                               | 0.652075 | -0.61689 | 0.06185 |
| 242 | 3.41 | 3.41 | 14.2 IPI:IPI00648852.2 | Gene_Symbol=Ppt1 2 days neonate thymus thymic cells<br>cDNA, RIKEN full-length enriched library,<br>clone:C920018O12 product:palmitoyl-protein<br>thioesterase 1, full insert sequence | 0.891325 | -0.16598 | NA      |
| 243 | 3.38 | 3.38 | 9.2 IPI:IPI00126634.1  | Gene_Symbol=Poldip2 Polymerase delta-interacting<br>protein 2                                                                                                                          | 1.090575 | 0.125089 | 0.13245 |
| 244 | 3.34 | 3.34 | 28.8 IPI:IPI00855212.1 | Gene_Symbol=1110020G09Rik Isoform 2 of UPF0465<br>protein C5orf33 homolog                                                                                                              | 1.014975 | 0.021444 | NA      |
| 245 | 3.3  | 4.2  | 5.8 IPI:IPI00222968.1  | Gene_Symbol=Lamp2 Isoform LAMP-2C of Lysosome-<br>associated membrane glycoprotein 2                                                                                                   | 0.7605   | -0.39498 | NA      |
| 246 | 3.29 | 3.32 | 18 IPI:IPI00109275.1   | Gene_Symbol=Slc25a22 Mitochondrial glutamate carrier<br>1                                                                                                                              | 0.97195  | -0.04105 | NA      |
| 247 | 3.25 | 3.26 | 10.6 IPI:IPI00788396.1 | Gene_Symbol=Clpx caseinolytic protease X isoform 2                                                                                                                                     | 1.02485  | 0.035413 | NA      |

|     |      |       |      |                   |                                                                                                      |          |          |        |
|-----|------|-------|------|-------------------|------------------------------------------------------------------------------------------------------|----------|----------|--------|
| 248 | 3.22 | 6.44  | 19.4 | IPI:IPI00876341.1 | Gene_Symbol=Vdac3 Voltage-dependent anion-selective channel protein 3                                | 1.09615  | 0.132445 | NA     |
| 249 | 3.08 | 3.08  | 11.6 | IPI:IPI00133108.1 | Gene_Symbol=Klk5 18-day embryo whole body cDNA, RIKEN full-length enriched library, clone:1110030O19 |          |          |        |
| 250 | 3.04 | 3.64  | 32.8 | IPI:IPI00116896.1 | product:similar to Kallikrein 5<br>Gene_Symbol=mt-Atp8 ATP synthase protein 8                        | 1.116325 | 0.158757 | NA     |
| 251 | 2.96 | 11.33 | 27.4 | IPI:IPI00122139.3 | Gene_Symbol=Acaa1b;Acaa1a 3-ketoacyl-CoA thiolase B, peroxisomal                                     | 0.48545  | -1.04261 | NA     |
| 252 | 2.96 | 2.99  | 45.1 | IPI:IPI00111770.7 | Gene_Symbol=Atp5k ATP synthase subunit e, mitochondrial                                              | 0.98725  | -0.01851 | 0.1059 |
| 253 | 2.92 | 2.92  | 17.3 | IPI:IPI00133403.1 | Gene_Symbol=Ndufb3 NADH dehydrogenase [ubiquinone] 1 beta subcomplex subunit 3                       | 0.991025 | -0.01301 | NA     |
| 254 | 2.89 | 8.89  | 21.1 | IPI:IPI00403650.2 | Gene_Symbol=Prss2 Anionic trypsin-2                                                                  |          |          |        |
| 255 | 2.89 | 2.89  | 11   | IPI:IPI00222767.1 | Gene_Symbol=Pdhx Pyruvate dehydrogenase protein X component, mitochondrial                           |          |          |        |
| 256 | 2.89 | 2.89  | 32.8 | IPI:IPI00133399.1 | Gene_Symbol=Ndufa6 NADH dehydrogenase [ubiquinone] 1 alpha subcomplex subunit 6                      | 1.12585  | 0.171015 | NA     |
| 257 | 2.86 | 2.86  | 4.1  | IPI:IPI00886014.1 | Gene_Symbol=Acsc3 Isoform 1 of Acyl-CoA synthetase short-chain family member 3, mitochondrial        | 1.017925 | 0.025631 | NA     |
| 258 | 2.8  | 2.8   | 6.2  | IPI:IPI00889240.1 | Gene_Symbol=Adhfe1 Isoform 2 of Hydroxyacid-oxoacid transhydrogenase, mitochondrial                  | 1.130525 | 0.176993 | NA     |
| 259 | 2.7  | 2.72  | 5.8  | IPI:IPI00221608.3 | Gene_Symbol=Samm50 Sorting and assembly machinery component 50 homolog                               | 1.006725 | 0.00967  | NA     |
| 260 | 2.68 | 2.68  | 17.3 | IPI:IPI00608064.1 | Gene_Symbol=Fech Fech protein (Fragment)                                                             |          |          |        |
| 261 | 2.67 | 2.7   | 14.7 | IPI:IPI00409412.3 | Gene_Symbol=Cyp2c67 Cytochrome P450, family 2, subfamily c, polypeptide 67                           |          |          |        |
| 262 | 2.62 | 2.62  | 12.9 | IPI:IPI00125266.1 | Gene_Symbol=Asah1 Acid ceramidase                                                                    | 0.739    | -0.43635 | NA     |
| 263 | 2.5  | 2.5   | 10.7 | IPI:IPI00137491.1 | Gene_Symbol=Acp5 Tartrate-resistant acid phosphatase type 5                                          | 0.5586   | -0.84011 | NA     |
| 264 | 2.42 | 2.42  | 9.2  | IPI:IPI00274222.2 | Gene_Symbol=Acad8 Isobutyryl-CoA dehydrogenase, mitochondrial                                        | 1.123875 | 0.168482 | NA     |
| 265 | 2.41 | 2.41  | 12.3 | IPI:IPI00128154.1 | Gene_Symbol=Ctsl Cathepsin L1                                                                        |          |          |        |
| 266 | 2.37 | 2.37  | 3.9  | IPI:IPI00111960.2 | Gene_Symbol=Gaa Lysosomal alpha-glucosidase                                                          | 0.93265  | -0.10059 | NA     |
| 267 | 2.36 | 2.36  | 11.1 | IPI:IPI00877288.1 | Gene_Symbol=Pgcp Isoform 2 of Plasma glutamate carboxypeptidase                                      |          |          |        |

|     |      |      |      |                   |                                                                                                                                                               |          |          |    |
|-----|------|------|------|-------------------|---------------------------------------------------------------------------------------------------------------------------------------------------------------|----------|----------|----|
| 268 | 2.35 | 2.37 | 19.2 | IPI:IPI00662861.1 | Gene_Symbol=LOC635087 similar to NADH dehydrogenase (ubiquinone) 1, subcomplex unknown, 2                                                                     | 0.9756   | -0.03564 | NA |
| 269 | 2.34 | 2.34 | 25.7 | IPI:IPI00762203.2 | Gene_Symbol=Ftl1 Ferritin light chain 1                                                                                                                       |          |          |    |
| 270 | 2.34 | 2.34 | 4.7  | IPI:IPI00761390.1 | Gene_Symbol=Slc27a2 solute carrier family 27 (fatty acid transporter), member 2                                                                               |          |          |    |
| 271 | 2.33 | 2.33 | 7.9  | IPI:IPI00874376.1 | Gene_Symbol=Apool 10, 11 days embryo whole body cDNA, RIKEN full-length enriched library, clone:2810024N24 product:hypothetical protein, full insert sequence | 1.2031   | 0.266757 | NA |
| 272 | 2.3  | 2.35 | 5.9  | IPI:IPI00309035.2 | Gene_Symbol=Rpn1 Dolichyl-diphosphooligosaccharide-protein glycosyltransferase subunit 1                                                                      |          |          |    |
| 273 | 2.3  | 2.3  | 44.2 | IPI:IPI00230241.6 | Gene_Symbol=Atp5e ATP synthase subunit epsilon, mitochondrial                                                                                                 |          |          |    |
| 274 | 2.29 | 2.29 | 67.5 | IPI:IPI00114377.1 | Gene_Symbol=Cox7a2 Cytochrome c oxidase polypeptide 7A2, mitochondrial                                                                                        |          |          |    |
| 275 | 2.27 | 2.27 | 22   | IPI:IPI00127227.2 | Gene_Symbol=Cbr4 Carbonyl reductase 4                                                                                                                         |          |          |    |
| 276 | 2.25 | 2.25 | 9.4  | IPI:IPI00170126.4 | Gene_Symbol=Ptrm1 Isoform 1 of Presequence protease, mitochondrial                                                                                            | 1.1092   | 0.14952  | NA |
| 277 | 2.23 | 2.25 | 3.1  | IPI:IPI00848562.1 | Gene_Symbol=Ubr4 retinoblastoma-associated factor 600 isoform 2                                                                                               |          |          |    |
| 278 | 2.22 | 2.22 | 7.5  | IPI:IPI00131176.1 | Gene_Symbol=mt-Co2 Cytochrome c oxidase subunit 2                                                                                                             | 1.030275 | 0.043029 | NA |
| 279 | 2.21 | 2.21 | 24.4 | IPI:IPI00222430.5 | Gene_Symbol=Dbi diazepam binding inhibitor isoform 1                                                                                                          | 1.1926   | 0.25411  | NA |
| 280 | 2.2  | 2.2  | 14.3 | IPI:IPI00229008.2 | Gene_Symbol=Ndufs4 NADH dehydrogenase [ubiquinone] iron-sulfur protein 4, mitochondrial                                                                       | 0.874875 | -0.19285 | NA |
| 281 | 2.19 | 4.19 | 13.7 | IPI:IPI00762185.2 | Gene_Symbol=Mpst 3-mercaptopyruvate sulfurtransferase                                                                                                         | 0.8412   | -0.24948 | NA |
| 282 | 2.17 | 2.17 | 7.8  | IPI:IPI00855011.1 | Gene_Symbol=LOC100046998 similar to optic atrophy 1                                                                                                           | 0.90025  | -0.1516  | NA |
| 283 | 2.15 | 2.15 | 7.8  | IPI:IPI00387282.4 | Gene_Symbol=Aadac Arylacetamide deacetylase                                                                                                                   | 0.488025 | -1.03497 | NA |
| 284 | 2.15 | 2.15 | 15   | IPI:IPI00317074.3 | Gene_Symbol=Slc25a10 Mitochondrial dicarboxylate carrier                                                                                                      | 0.8863   | -0.17413 | NA |
| 285 | 2.15 | 2.15 | 12.4 | IPI:IPI00753211.1 | Gene_Symbol=Echdc3 Enoyl Coenzyme A hydratase domain containing 3                                                                                             |          |          |    |
| 286 | 2.13 | 3.84 | 6.1  | IPI:IPI00756257.1 | Gene_Symbol=Ttn Isoform 1 of Titin                                                                                                                            |          |          |    |

|     |      |      |                        |                                                                                                          |          |          |    |
|-----|------|------|------------------------|----------------------------------------------------------------------------------------------------------|----------|----------|----|
| 287 | 2.13 | 2.13 | 15 IPI:IPI00115117.1   | Gene_Symbol=Stoml2 Stomatin-like protein 2<br>RANDOMIZED Gene_Symbol=Usp48 Isoform 1 of                  |          |          |    |
| 288 | 2.12 | 2.12 | 2.6 XXXXXIPI:IPI007884 | Ubiquitin carboxyl-terminal hydrolase 48<br>Gene_Symbol=Ndufs2 NADH dehydrogenase                        |          |          |    |
| 289 | 2.11 | 2.11 | 18.6 IPI:IPI00128023.3 | [ubiquinone] iron-sulfur protein 2, mitochondrial<br>Gene_Symbol=Idh3g Isocitrate dehydrogenase [NAD]    | 1.259425 | 0.332765 | NA |
| 290 | 2.11 | 2.11 | 6.4 IPI:IPI00109169.1  | subunit gamma, mitochondrial                                                                             | 1.01855  | 0.026517 | NA |
| 291 | 2.09 | 2.09 | 11.7 IPI:IPI00457825.2 | Gene_Symbol=- 47 kDa protein<br>Gene_Symbol=Fahd2a Fumarylacetoacetate hydrolase                         |          |          |    |
| 292 | 2.09 | 2.09 | 8.9 IPI:IPI00121218.5  | domain-containing protein 2A                                                                             | 1.1611   | 0.215492 | NA |
| 293 | 2.08 | 2.09 | 11.2 IPI:IPI00895479.1 | Gene_Symbol=2810422J05Rik 27 kDa protein<br>Gene_Symbol=Fam136a (BLAST score:280, P =2e-74               | 0.6956   | -0.52367 | NA |
| 294 | 2.08 | 2.08 | 18.1 IPI:IPI00133411.1 | 2010309E21Rik Protein FAM136A<br>Gene_Symbol=Mgst1 Microsomal glutathione S-                             | 1.2381   | 0.308128 | NA |
| 295 | 2.07 | 2.07 | 19.4 IPI:IPI00331322.3 | transferase 1<br>Gene_Symbol=Acot2 Activated spleen cDNA, RIKEN full-                                    |          |          |    |
| 296 | 2.07 | 2.07 | 4.9 IPI:IPI00653566.1  | length enriched library, clone:F830219O19<br>product:mitochondrial acyl-CoA thioesterase 1, full insert  | 0.612975 | -0.7061  | NA |
| 297 | 2.06 | 2.15 | 16.9 IPI:IPI00129516.1 | sequence<br>Gene_Symbol=Uqcrh Cytochrome b-c1 complex subunit                                            |          |          |    |
| 298 | 2.05 | 2.05 | 7.1 IPI:IPI00122634.1  | 6, mitochondrial<br>Gene_Symbol=Cyp2a12 Cytochrome P450, family 2,                                       | 0.560275 | -0.83579 | NA |
| 299 | 2.05 | 2.05 | 13 IPI:IPI00115454.3   | subfamily a, polypeptide 12<br>Gene_Symbol=Sfxn1 Sideroflexin-1                                          |          |          |    |
| 300 | 2.05 | 2.05 | 12.1 IPI:IPI00132958.1 | Gene_Symbol=Them2 Thioesterase superfamily<br>member 2                                                   | 0.90885  | -0.13789 | NA |
| 301 | 2.04 | 3.35 | 16.9 IPI:IPI00319973.3 | Gene_Symbol=Pgrmc1 Membrane-associated<br>progesterone receptor component 1                              |          |          |    |
| 302 | 2.04 | 2.05 | 9.3 IPI:IPI00134504.1  | Gene_Symbol=Cyp3a11 Cytochrome P450 3A11                                                                 |          |          |    |
| 303 | 2.04 | 2.04 | 12.4 IPI:IPI00475322.1 | Gene_Symbol=Msra Msra protein                                                                            | 1.1163   | 0.158725 | NA |
| 304 | 2.02 | 2.06 | 14.7 IPI:IPI00556699.1 | Gene_Symbol=Gcsh Putative uncharacterized protein<br>Gene_Symbol=Plbl1 (Putative phospholipase B-like 1, | 1.25095  | 0.323024 | NA |
| 305 | 2.02 | 2.03 | 5.6 IPI:IPI00845617.1  | BLAST score: 1096, P =0.0) LOC100045163 similar to<br>RIKEN cDNA 1100001H23 gene                         | 0.775475 | -0.36685 | NA |
| 306 | 2.02 | 2.02 | 7.9 IPI:IPI00133877.1  | Gene_Symbol=Cyp4a14 Cytochrome P450 4A14<br>Gene_Symbol=Mlycd Isoform Mitochondrial of Malonyl-          | 0.4408   | -1.1818  | NA |
| 307 | 2.01 | 2.01 | 14.8 IPI:IPI00114866.1 | CoA decarboxylase, mitochondrial                                                                         | 0.996425 | -0.00517 | NA |

|     |   |      |      |                    |                                                                                                                                                                          |          |          |    |
|-----|---|------|------|--------------------|--------------------------------------------------------------------------------------------------------------------------------------------------------------------------|----------|----------|----|
| 308 | 2 | 4.25 | 17.8 | IPI:IPI00135231.2  | Gene_Symbol=ldh1 0 day neonate lung cDNA, RIKEN full-length enriched library, clone:E030024J03 product:isocitrate dehydrogenase 1 (NADP+), soluble, full insert sequence | 0.532125 | -0.91016 | NA |
| 309 | 2 | 4    | 8.8  | IPI:IPI00762478.1  | Gene_Symbol=Acsm3 Isoform 1 of Acyl-coenzyme A synthetase ACSM3, mitochondrial                                                                                           | 1.0529   | 0.074368 | NA |
| 310 | 2 | 2.33 | 4.9  | XXXXXIPI:IPI006530 | RANDOMIZED Gene_Symbol=Mfn1 Mitofusin-1                                                                                                                                  | 1.31065  | 0.390282 | NA |
| 311 | 2 | 2.02 | 6.7  | IPI:IPI00274656.6  | Gene_Symbol=Pmpcb Mitochondrial-processing peptidase subunit beta                                                                                                        | 1.2861   | 0.363003 | NA |
| 312 | 2 | 2    | 14.4 | IPI:IPI00118963.1  | Gene_Symbol=Mrpl12 39S ribosomal protein L12, mitochondrial                                                                                                              | 1.0642   | 0.089769 | NA |
| 313 | 2 | 2    | 21.9 | IPI:IPI00114246.2  | Gene_Symbol=Ndufb11 NADH dehydrogenase [ubiquinone] 1 beta subcomplex subunit 11, mitochondrial                                                                          | 1.08975  | 0.123997 | NA |
| 314 | 2 | 2    | 2.3  | IPI:IPI00355248.5  | Gene_Symbol=mt-Co1 cytochrome c oxidase subunit I                                                                                                                        | 0.8147   | -0.29566 | NA |
