# Supplementary material
Source: PubMed Central journal article supplement (PMC3805328)
Supplement: pr400219s_si_004.pdf [file pr400219s_si_004.pdf]

Supplementary Table 4. Summary of functionally enriched terms based on Mitonetwork and IPA

This table comprises of three tabs:

- |                        |                                                                                                    |
|------------------------|----------------------------------------------------------------------------------------------------|
| <b>A) IPA Toxicity</b> | List of perturbed pathways associated with troglitazone toxicity                                   |
| <b>B) 14 days</b>      | Summary of functional enrichment after 14 days of troglitazone administration based on Mitonetwork |
| <b>C) 28 days</b>      | Summary of functional enrichment after 28 days of troglitazone administration based on Mitonetwork |



## A) IPA toxicity

### Ingenuity Toxicity Lists      -Log *P*

|                                                            |         |
|------------------------------------------------------------|---------|
| Mitochondrial Dysfunction                                  | 3.6E01  |
| Fatty Acid Metabolism                                      | 2.62E01 |
| LPS/IL-1 Mediated Inhibition<br>of RXR Function            | 4.86E00 |
| Oxidative Stress                                           | 1.74E00 |
| Cytochrome P450 Panel -<br>Substrate is a Xenobiotic (Rat) | 1.53E00 |
| PXR/RXR Activation                                         | 1.53E00 |

**Proteins**

HSD17B10, SDHB (includes EG:6390), NDUFA9 (includes EG:4704), NDUFA10 (includes EG:4705), PRDX5, NDUFB5, COX5B, NDUFB10, PDHA1 (includes EG:5160), NDUFB9, MAOB, NDUFS1, SOD2, NDUFS6 (includes EG:4726), CYB5R3, UQCRFS1, NDUFS2, OGDH, COX4I1, NDUFS4, AIFM1, NDUFA8, COX1, SDHA (includes EG:6389), NDUFV1, COX6B1, NDUFB3, CPT1A, NDUFS7, COX6C, NDUFA13, PRDX3, NDUFS8, NDUFV2, NDUFA6, UQCRC2, COX5A, COX2, UQCRC1, NDUFA7

HSD17B10, ALDH4A1, ACAA2, GCDH, HADHB, ALDH2, CYP1A2, CYP2E1, PECl, ALDH3A2, ACAD8, ACADM, HSD17B4, ALDH5A1, HADHA, ALDH1B1, CPT1A, ACOX2, ACOX1, CYP2A12, ECH1, ACAD9, DCI, ALDH9A1, ACADS, ACADL, CYP4A14, ACADVL, ACAT1, CPT2, EHHADH, IVD, ACSL1, HADH

ALDH4A1, ALDH1B1, CPT1A, ACOX2, ACOX1, CYP2A12, HMGCS2, ALDH9A1, CYP4A14, MAOB, ALDH3A2, CPT2, FABP1, ACSL1, ALDH5A1, GSTK1

PRDX3, SOD2, PRDX5, CYP2E1, GPX1

CYP1A2, CYP2E1, CYP2A12

CYP1A2, CPT1A, CES3, ALDH3A2, HMGCS2

**B) 14 days no expansion**

**Largest connected component**

Cat  
Ctsb  
Ctsd  
Dbi  
Hsd17b4  
Ndufs4  
Abcd3  
Scp2

| <b>GO-term</b>                        | <b>Data Proportion</b> | <b>Global Proportion</b>  | <b>P-value</b> | <b>FDR RATE</b> | <b>EXPECTED FALSE POSITIVES</b> | <b>Gene Names</b>         |
|---------------------------------------|------------------------|---------------------------|----------------|-----------------|---------------------------------|---------------------------|
| cellular lipid metabolic process      | 4 of 8 genes, 50.0%    | 618 of 33893 genes, 1.8%  | 0.00068        | 0.00%           | 0                               | Dbi, Cat, Scp2, Hsd17b4   |
| oxidation-reduction process           | 4 of 8 genes, 50.0%    | 761 of 33893 genes, 2.2%  | 0.00156        | 0.00%           | 0                               | Ndufs4, Dbi, Cat, Hsd17b4 |
| lipid metabolic process               | 4 of 8 genes, 50.0%    | 862 of 33893 genes, 2.5%  | 0.00254        | 0.00%           | 0                               | Dbi, Cat, Scp2, Hsd17b4   |
| fatty acid beta-oxidation             | 2 of 8 genes, 25.0%    | 39 of 33893 genes, 0.1%   | 0.00341        | 0.50%           | 0.02                            | Dbi, Hsd17b4              |
| fatty acid catabolic process          | 2 of 8 genes, 25.0%    | 50 of 33893 genes, 0.1%   | 0.00564        | 0.80%           | 0.04                            | Dbi, Hsd17b4              |
| monocarboxylic acid catabolic process | 2 of 8 genes, 25.0%    | 53 of 33893 genes, 0.2%   | 0.00634        | 0.67%           | 0.04                            | Dbi, Hsd17b4              |
| cellular catabolic process            | 4 of 8 genes, 50.0%    | 1126 of 33893 genes, 3.3% | 0.00724        | 0.57%           | 0.04                            | Dbi, Cat, Ctsd, Hsd17b4   |

## C) 28 days no expansion

### Largest connected component

Gldc  
Cyb5  
Actg1  
Prdx3  
Asah1  
Cat  
Ctsb  
Ctsd  
AC160930.1  
Glud1  
Pdia3  
Hspa5  
Hsd17b10  
Hrsp12  
Hsd17b4  
Phyh  
Grpel1  
P4hb  
Pcx  
Psap  
Abcd3  
Scp2  
Sod1  
Sod2  
Gm11808  
Uba52  
2810422J05Rik  
Dhrs4  
Aass  
Clpp  
Pmpcb  
Ehhadh

| GO-term                                      | Data Proportion       | Global Proportion          | P-value  | FDR RATE | EXPECTED FALSE POSITIVES | Gene Names                                                                                                                                                                   |
|----------------------------------------------|-----------------------|----------------------------|----------|----------|--------------------------|------------------------------------------------------------------------------------------------------------------------------------------------------------------------------|
| oxidation-reduction process                  | 13 of 32 genes, 40.6% | 761 of 33893 genes, 2.2%   | 2.30E-11 | 0.00%    | 0                        | Ehhadh, Hsd17b10, Sod2, Dhhrs4, Cat, Glud1, Phyh, Prdx3, Aass, Cyb5, Hsd17b4, Sod1, Gldc                                                                                     |
| primary metabolic process                    | 26 of 32 genes, 81.2% | 7095 of 33893 genes, 20.9% | 1.47E-10 | 0.00%    | 0                        | Hspa5, Dhhrs4, Scp2, P4hb, Glud1, Cttd, Prdx3, Hsd17b4, Sod1, Asah1, Pcx, Ehhadh, Hsd17b10, Sod2, Pdia3, Cat, Pmpcb, Clpp, Ctsb, Phyh, Grpel1, Aass, Uba52, Psap, Cyb5, Gldc |
| carboxylic acid metabolic process            | 11 of 32 genes, 34.4% | 648 of 33893 genes, 1.9%   | 3.03E-09 | 0.00%    | 0                        | Pcx, Ehhadh, Sod2, P4hb, Glud1, Phyh, Aass, Cyb5, Hsd17b4, Gldc, Sod1                                                                                                        |
| oxoacid metabolic process                    | 11 of 32 genes, 34.4% | 648 of 33893 genes, 1.9%   | 3.03E-09 | 0.00%    | 0                        | Pcx, Ehhadh, Sod2, P4hb, Glud1, Phyh, Aass, Cyb5, Hsd17b4, Gldc, Sod1                                                                                                        |
| cellular catabolic process                   | 13 of 32 genes, 40.6% | 1126 of 33893 genes, 3.3%  | 3.19E-09 | 0.00%    | 0                        | Ehhadh, Hspa5, Cat, Glud1, Cttd, Clpp, Phyh, Prdx3, Aass, Uba52, Hsd17b4, Sod1, Gldc                                                                                         |
| organic acid metabolic process               | 11 of 32 genes, 34.4% | 662 of 33893 genes, 2.0%   | 3.81E-09 | 0.00%    | 0                        | Pcx, Ehhadh, Sod2, P4hb, Glud1, Phyh, Aass, Cyb5, Hsd17b4, Gldc, Sod1                                                                                                        |
| cellular ketone metabolic process            | 11 of 32 genes, 34.4% | 670 of 33893 genes, 2.0%   | 4.33E-09 | 0.00%    | 0                        | Pcx, Ehhadh, Sod2, P4hb, Glud1, Phyh, Aass, Cyb5, Hsd17b4, Gldc, Sod1                                                                                                        |
| metabolic process                            | 26 of 32 genes, 81.2% | 8164 of 33893 genes, 24.1% | 4.52E-09 | 0.00%    | 0                        | Hspa5, Dhhrs4, Scp2, P4hb, Glud1, Cttd, Prdx3, Hsd17b4, Sod1, Asah1, Pcx, Ehhadh, Hsd17b10, Sod2, Pdia3, Cat, Pmpcb, Clpp, Ctsb, Phyh, Grpel1, Aass, Uba52, Psap, Cyb5, Gldc |
| catabolic process                            | 13 of 32 genes, 40.6% | 1355 of 33893 genes, 4.0%  | 3.17E-08 | 0.00%    | 0                        | Ehhadh, Hspa5, Cat, Glud1, Cttd, Clpp, Phyh, Prdx3, Aass, Uba52, Hsd17b4, Sod1, Gldc                                                                                         |
| lipid metabolic process                      | 11 of 32 genes, 34.4% | 862 of 33893 genes, 2.5%   | 6.31E-08 | 0.00%    | 0                        | Pcx, Asah1, Ehhadh, Dhhrs4, Cat, Scp2, Phyh, Cyb5, Hsd17b4, Psap, Sod1                                                                                                       |
| small molecule metabolic process             | 14 of 32 genes, 43.8% | 1810 of 33893 genes, 5.3%  | 8.17E-08 | 0.00%    | 0                        | Pcx, Ehhadh, Sod2, Pdia3, Dhhrs4, Cat, P4hb, Glud1, Phyh, Aass, Cyb5, Hsd17b4, Sod1, Gldc                                                                                    |
| cellular metabolic process                   | 23 of 32 genes, 71.9% | 6998 of 33893 genes, 20.6% | 1.94E-07 | 0.00%    | 0                        | Hspa5, Dhhrs4, Scp2, P4hb, Glud1, Cttd, Prdx3, Hsd17b4, Sod1, Pcx, Ehhadh, Hsd17b10, Sod2, Pdia3, Cat, Clpp, Phyh, Grpel1, Aass, Uba52, Cyb5, Psap, Gldc                     |
| organic acid catabolic process               | 6 of 32 genes, 18.8%  | 122 of 33893 genes, 0.4%   | 4.75E-07 | 0.00%    | 0                        | Ehhadh, Phyh, Aass, Glud1, Hsd17b4, Gldc                                                                                                                                     |
| carboxylic acid catabolic process            | 6 of 32 genes, 18.8%  | 122 of 33893 genes, 0.4%   | 4.75E-07 | 0.00%    | 0                        | Ehhadh, Phyh, Aass, Glud1, Hsd17b4, Gldc                                                                                                                                     |
| hydrogen peroxide metabolic process          | 4 of 32 genes, 12.5%  | 29 of 33893 genes, 0.1%    | 4.50E-06 | 0.00%    | 0                        | Sod2, Prdx3, Cat, Sod1                                                                                                                                                       |
| cellular response to reactive oxygen species | 4 of 32 genes, 12.5%  | 40 of 33893 genes, 0.1%    | 1.72E-05 | 0.00%    | 0                        | Sod2, Prdx3, Cat, Sod1                                                                                                                                                       |

|                                                |                          |                                |          |       |                                                                                                                                                                               |
|------------------------------------------------|--------------------------|--------------------------------|----------|-------|-------------------------------------------------------------------------------------------------------------------------------------------------------------------------------|
| cellular lipid metabolic process               | 8 of 32 genes,<br>25.0%  | 618 of 33893<br>genes, 1.8%    | 2.46E-05 | 0.00% | 0 Ehhadh, Dhhs4, Cat, Scp2, Phyh, Cyb5, Hsd17b4, Psap                                                                                                                         |
| response to hydrogen peroxide                  | 4 of 32 genes,<br>12.5%  | 47 of 33893<br>genes, 0.1%     | 3.34E-05 | 0.00% | 0 Sod2, Prdx3, Cat, Sod1                                                                                                                                                      |
| cellular amino acid metabolic process          | 6 of 32 genes,<br>18.8%  | 273 of 33893<br>genes, 0.8%    | 5.79E-05 | 0.00% | 0 Sod2, Aass, P4hb, Glud1, Sod1, Gldc                                                                                                                                         |
| reactive oxygen species metabolic process      | 4 of 32 genes,<br>12.5%  | 57 of 33893<br>genes, 0.2%     | 7.36E-05 | 0.00% | 0 Sod2, Prdx3, Cat, Sod1                                                                                                                                                      |
| cellular process                               | 26 of 32 genes,<br>81.2% | 12361 of 33893<br>genes, 36.5% | 8.08E-05 | 0.00% | 0 Abcd3, Hspa5, Dhhs4, Scp2, P4hb, Glud1, Ctsd, Prdx3, Hsd17b4, Sod1, Pcx, Ehhadh, Hsd17b10, Sod2, Pdia3, Cat, Clpp, Actg1, Ctsb, Phyh, Grpel1, Aass, Uba52, Cyb5, Psap, Gldc |
| negative regulation of cell death              | 7 of 32 genes,<br>21.9%  | 487 of 33893<br>genes, 1.4%    | 8.81E-05 | 0.00% | 0 Hspa5, Ctsb, Sod2, Prdx3, Cat, Uba52, Sod1                                                                                                                                  |
| cellular response to oxidative stress          | 4 of 32 genes,<br>12.5%  | 62 of 33893<br>genes, 0.2%     | 0.0001   | 0.00% | 0 Sod2, Prdx3, Cat, Sod1                                                                                                                                                      |
| regulation of mitochondrial membrane potential | 3 of 32 genes,<br>9.4%   | 18 of 33893<br>genes, 0.1%     | 0.00018  | 0.00% | 0 Sod2, Prdx3, Sod1                                                                                                                                                           |
| response to reactive oxygen species            | 4 of 32 genes,<br>12.5%  | 72 of 33893<br>genes, 0.2%     | 0.00018  | 0.00% | 0 Sod2, Prdx3, Cat, Sod1                                                                                                                                                      |
| monocarboxylic acid metabolic process          | 6 of 32 genes,<br>18.8%  | 351 of 33893<br>genes, 1.0%    | 0.00025  | 0.00% | 0 Pcx, Ehhadh, Phyh, P4hb, Hsd17b4, Cyb5                                                                                                                                      |
| cellular amine metabolic process               | 6 of 32 genes,<br>18.8%  | 353 of 33893<br>genes, 1.0%    | 0.00026  | 0.00% | 0 Sod2, Aass, P4hb, Glud1, Sod1, Gldc                                                                                                                                         |
| amine metabolic process                        | 6 of 32 genes,<br>18.8%  | 429 of 33893<br>genes, 1.3%    | 0.0008   | 0.00% | 0 Sod2, Aass, P4hb, Glud1, Sod1, Gldc                                                                                                                                         |
| regulation of cell death                       | 8 of 32 genes,<br>25.0%  | 1019 of 33893<br>genes, 3.0%   | 0.00106  | 0.00% | 0 Hspa5, Ctsb, Sod2, Pdia3, Prdx3, Cat, Uba52, Sod1                                                                                                                           |
| negative regulation of apoptosis               | 6 of 32 genes,<br>18.8%  | 462 of 33893<br>genes, 1.4%    | 0.00122  | 0.00% | 0 Hspa5, Sod2, Prdx3, Cat, Uba52, Sod1                                                                                                                                        |
| negative regulation of programmed cell death   | 6 of 32 genes,<br>18.8%  | 468 of 33893<br>genes, 1.4%    | 0.00132  | 0.00% | 0 Hspa5, Sod2, Prdx3, Cat, Uba52, Sod1                                                                                                                                        |
| response to nutrient levels                    | 4 of 32 genes,<br>12.5%  | 154 of 33893<br>genes, 0.5%    | 0.00393  | 0.00% | 0 Hspa5, Sod2, Ctsd, Sod1                                                                                                                                                     |
| small molecule catabolic process               | 6 of 32 genes,<br>18.8%  | 574 of 33893<br>genes, 1.7%    | 0.00422  | 0.00% | 0 Ehhadh, Phyh, Aass, Glud1, Hsd17b4, Gldc                                                                                                                                    |
| fatty acid catabolic process                   | 3 of 32 genes,<br>9.4%   | 50 of 33893<br>genes, 0.1%     | 0.00428  | 0.00% | 0 Ehhadh, Phyh, Hsd17b4                                                                                                                                                       |
| response to oxidative stress                   | 4 of 32 genes,<br>12.5%  | 162 of 33893<br>genes, 0.5%    | 0.0048   | 0.00% | 0 Sod2, Prdx3, Cat, Sod1                                                                                                                                                      |



|                                        |                      |                           |         |       |                                                        |
|----------------------------------------|----------------------|---------------------------|---------|-------|--------------------------------------------------------|
| monocarboxylic acid catabolic process  | 3 of 32 genes, 9.4%  | 53 of 33893 genes, 0.2%   | 0.00511 | 0.00% | 0 Ehhadh, Phyh, Hsd17b4                                |
| hydrogen peroxide biosynthetic process | 2 of 32 genes, 6.2%  | 7 of 33893 genes, 0.0%    | 0.00533 | 0.05% | 0.02 Sod2, Sod1                                        |
| cell death                             | 8 of 32 genes, 25.0% | 1305 of 33893 genes, 3.9% | 0.00642 | 0.05% | 0.02 Hspa5, Ctsb, Sod2, Pdia3, Prdx3, Cat, Uba52, Sod1 |
| death                                  | 8 of 32 genes, 25.0% | 1313 of 33893 genes, 3.9% | 0.00671 | 0.05% | 0.02 Hspa5, Ctsb, Sod2, Pdia3, Prdx3, Cat, Uba52, Sod1 |
| response to extracellular stimulus     | 4 of 32 genes, 12.5% | 177 of 33893 genes, 0.5%  | 0.0068  | 0.05% | 0.02 Hspa5, Sod2, Ctsd, Sod1                           |
| cell redox homeostasis                 | 3 of 32 genes, 9.4%  | 63 of 33893 genes, 0.2%   | 0.00861 | 0.10% | 0.04 Pdia3, Prdx3, P4hb                                |
| regulation of apoptosis                | 7 of 32 genes, 21.9% | 985 of 33893 genes, 2.9%  | 0.00901 | 0.10% | 0.04 Hspa5, Sod2, Pdia3, Prdx3, Cat, Uba52, Sod1       |
| regulation of programmed cell death    | 7 of 32 genes, 21.9% | 996 of 33893 genes, 2.9%  | 0.00967 | 0.09% | 0.04 Hspa5, Sod2, Pdia3, Prdx3, Cat, Uba52, Sod1       |
| cellular amino acid catabolic process  | 3 of 32 genes, 9.4%  | 66 of 33893 genes, 0.2%   | 0.00991 | 0.09% | 0.04 Aass, Glud1, Gldc                                 |
