# Supplementary material
Source: PubMed Central journal article supplement (PMC3805328)
Supplement: pr400219s_si_005.pdf [file pr400219s_si_005.pdf]

#### Supplementary Table 4. List of murine genes matching identified proteins with potential PPRE sites

In order to screen for putative PPRE sites, accession numbers were first extracted from IPI and converted to ENSEMBL accession numbers. Core and Matrix similarity thresholds were set at 0.8 (1.00 for perfect match) for accurate prediction as well as minimising false positives which is based on Position Weight Matrix of the consensus sequence of the matrix selected (V\$PPAR\_RXR.01, V\$PPAR\_RXR.02 and V\$PPARA.01). Position Weight Matrix is an optimal way of prediction the natural variation of PPRE sequences. Start – start position of predicted PPRE site from transcriptional start site; End – end position of predicted PPRE site from transcriptional start site.

This table comprises of two tabs:

- A) PPRE\_14 days** Genes with predicted PPRE sequences 5kb upstream and downstream of 5' UTR at 14 days
- B) PPRE\_28 days** Genes with predicted PPRE sequences 5kb upstream and downstream of 5' UTR at 28 days

#### Column description for both tabs

|                                  |                                                                                                                                                                                                                                                    |
|----------------------------------|----------------------------------------------------------------------------------------------------------------------------------------------------------------------------------------------------------------------------------------------------|
| <b>SEQUENCE NAME<sup>1</sup></b> | Gene symbol                                                                                                                                                                                                                                        |
| <b>MATRIX<sup>2</sup></b>        | Position Weight Matrixes V\$PPAR_RXR.01 or V\$PPAR_RXR.02 were used.                                                                                                                                                                               |
| <b>CORE SIM.</b>                 | The core similarity is a score between zero and one based on similarity to the core (4 highest conserved positions) in the matrix.                                                                                                                 |
| <b>MATRIX SIM.</b>               | The matrix similarity is calculated only when the core similarity meets the threshold. A perfect match to the matrix gets a score of 1.00 (each sequence position corresponds to the highest conserved nucleotide at that position in the matrix). |
| <b>SEQUENCE</b>                  | DNA sequence that contains potential PPRE sequences that match the consensus binding motif AGGTCA and its variation sequence.                                                                                                                      |
| <b>REFERENCE</b>                 | References of genes with known functional PPRE sites                                                                                                                                                                                               |

<sup>1</sup> Rows in green denote known genes with functional PPRE sites

<sup>2</sup> PPARg binds to DNA as an obligate heterodimer with the RXR.  
Ref: Kliewer S. A., et al. (1992) *Nature* **358**, 771–774

A) PPRE 14 days

| No. | SEQUENCE NAME <sup>1</sup> | MATRIX <sup>2</sup> | START POS. | END POS. | COR E SIM. | MATRIX SIM. | SEQUENCE                     | REFERENCE |
|-----|----------------------------|---------------------|------------|----------|------------|-------------|------------------------------|-----------|
| 1   | Abcd3                      | V\$PPAR_RXR.01      | 385        | 407      | 0.754      | 0.804       | actgagtgggaaacAGGGc<br>aaag  |           |
| 2   | P4hb                       | V\$PPAR_RXR.01      | 193        | 215      | 0.754      | 0.811       | gaacctaggagaaaAGGGc<br>agga  |           |
| 3   | Ndufa8                     | V\$PPAR_RXR.01      | 3648       | 3670     | 0.754      | 0.812       | agcttcaaggtaaAGGGtaa<br>aa   |           |
| 4   | Ephx2                      | V\$PPAR_RXR.01      | 155        | 177      | 0.754      | 0.813       | aggggagaggagaaaAGGG<br>caagg |           |
| 5   | Ppt1                       | V\$PPAR_RXR.01      | 128        | 150      | 0.754      | 0.814       | gagaaagaggaaaaAGGG<br>gaata  |           |
| 6   | Maob                       | V\$PPAR_RXR.01      | 2507       | 2529     | 0.754      | 0.815       | gaagatatgggcacAGGGc<br>aaaa  |           |
| 7   | Uox                        | V\$PPAR_RXR.01      | 2120       | 2142     | 0.754      | 0.818       | atcttacaggacacAGGCca<br>act  |           |
| 8   | Kmo                        | V\$PPAR_RXR.01      | 3326       | 3348     | 0.754      | 0.823       | accaccaggggcaaAGGC<br>aagag  |           |
| 9   | Ndufs2                     | V\$PPAR_RXR.01      | 4039       | 4061     | 0.754      | 0.825       | ggtccctgggacatAGGCca<br>cca  |           |
| 10  | Timm13                     | V\$PPAR_RXR.01      | 3302       | 3324     | 0.754      | 0.825       | ggctcttaggacacAGGGca<br>gac  |           |
| 11  | 1100001H23Rik              | V\$PPAR_RXR.01      | 448        | 470      | 0.754      | 0.83        | aaggaaatggctaaAGGGc<br>atgc  |           |
| 12  | Abat                       | V\$PPAR_RXR.01      | 1194       | 1216     | 0.754      | 0.833       | gtccttaggacagAGGGca<br>gct   |           |
| 13  | Actg1                      | V\$PPAR_RXR.01      | 3960       | 3982     | 0.754      | 0.835       | gactccaaggtcacAGGGc<br>acag  |           |
| 14  | Por                        | V\$PPAR_RXR.01      | 3269       | 3291     | 0.754      | 0.842       | taaacatggggaaaAGGCc<br>agat  |           |
| 15  | Atp5j                      | V\$PPAR_RXR.01      | 4092       | 4114     | 0.754      | 0.843       | ttgaactaggggacAGGCca<br>gaa  |           |
| 16  | Lamp2                      | V\$PPAR_RXR.01      | 4077       | 4099     | 0.754      | 0.852       | agcttgtaggaaaaAGGGca<br>ttt  |           |
| 17  | Hint2                      | V\$PPAR_RXR.01      | 2247       | 2269     | 0.754      | 0.853       | aggatcaggggaaAGGCc<br>atat   |           |
| 18  | Ehhadh                     | V\$PPAR_RXR.01      | 2306       | 2328     | 0.754      | 0.863       | ttttaataggtaaaAGGGcag<br>ga  |           |
| 19  | Slc25a1                    | V\$PPAR_RXR.01      | 3326       | 3348     | 0.754      | 0.865       | gtagagagggacaaaAGGCc<br>atcc |           |
| 20  | Slc25a1                    | V\$PPAR_RXR.01      | 4440       | 4462     | 0.754      | 0.865       | ggtaggcgggacaaaAGGCc<br>aact |           |
| 21  | Atp5k                      | V\$PPAR_RXR.01      | 1963       | 1985     | 0.769      | 0.802       | ctcaggtaggccagTGGTaa<br>ccc  |           |
| 22  | Dhrs4                      | V\$PPAR_RXR.01      | 491        | 513      | 0.769      | 0.803       | aatatatggggcatGGGTaa<br>gt   |           |
| 23  | Tmprss13                   | V\$PPAR_RXR.01      | 1755       | 1777     | 0.769      | 0.803       | ccacaccagagcaaTGGTc<br>agac  |           |
| 24  | Es31                       | V\$PPAR_RXR.01      | 928        | 950      | 0.769      | 0.805       | ctggtctggccatTGGTgac<br>ac   |           |
| 25  | Es31                       | V\$PPAR_RXR.01      | 928        | 950      | 0.769      | 0.805       | ctggtctggccatTGGTgac<br>ac   |           |

|                  |                |      |      |       |       |                                               |
|------------------|----------------|------|------|-------|-------|-----------------------------------------------|
| 26 Letm1         | V\$PPAR_RXR.01 | 1388 | 1410 | 0.769 | 0.806 | ccatggaaggccatTGGTga<br>agg                   |
| 27 Dmgdh         | V\$PPAR_RXR.01 | 4918 | 4940 | 0.769 | 0.806 | ttgggggaggggatGGGTca<br>tcc                   |
| 28 Cpox          | V\$PPAR_RXR.01 | 4389 | 4411 | 0.769 | 0.806 | ataatcgaggccacTGGTtat<br>tc                   |
| 29 1300010F03Rik | V\$PPAR_RXR.01 | 1110 | 1132 | 0.769 | 0.808 | gtagagaggaaagGGGTc<br>atag                    |
| 30 Mut           | V\$PPAR_RXR.01 | 3789 | 3811 | 0.769 | 0.81  | agaaatgaggaaaaGGGTc<br>ttcc                   |
| 31 Cisd1         | V\$PPAR_RXR.01 | 610  | 632  | 0.769 | 0.811 | ggaatgtaggtcagTGGTaa<br>tgc                   |
| 32 Acaa1a        | V\$PPAR_RXR.01 | 3009 | 3031 | 0.769 | 0.815 | agggattgggagagGGGTc<br>aaaa                   |
| 33 Gcat          | V\$PPAR_RXR.01 | 877  | 899  | 0.769 | 0.822 | gagatgtgggaaaGGGTt<br>actg                    |
| 34 Mosc2         | V\$PPAR_RXR.01 | 993  | 1015 | 0.769 | 0.825 | cacatattgggtaaTGGTga<br>gct                   |
| 35 Ndufa8        | V\$PPAR_RXR.01 | 1128 | 1150 | 0.769 | 0.828 | tgaaacatgggaaaTGGTa<br>agca                   |
| 36 Ppt1          | V\$PPAR_RXR.01 | 32   | 54   | 0.769 | 0.828 | tgtgtggaggccagTGGTca<br>acc                   |
| 37 Ppt1          | V\$PPAR_RXR.01 | 776  | 798  | 0.769 | 0.828 | gagaaggaggaaaGGGT<br>aatc                     |
| 38 Aadat         | V\$PPAR_RXR.01 | 3269 | 3291 | 0.769 | 0.835 | ggttataaggtgaaTGGTgat<br>tc                   |
| 39 Actg1         | V\$PPAR_RXR.01 | 2091 | 2113 | 0.769 | 0.836 | accatgaaggtcaaGGGTct<br>gca                   |
| 40 Acaa1b        | V\$PPAR_RXR.01 | 890  | 912  | 0.769 | 0.838 | tgcttattgtcaaGGGTgac<br>cc                    |
| 41 Slc25a13      | V\$PPAR_RXR.01 | 2160 | 2182 | 0.769 | 0.846 | tcattaaaggtcatGGGTcaa<br>ag                   |
| 42 Scpep1        | V\$PPAR_RXR.01 | 891  | 913  | 0.769 | 0.882 | gaaatgcaggttaaTGGTca<br>atc                   |
| 43 Acot2         | V\$PPAR_RXR.01 | 4514 | 4536 | 0.769 | 0.884 | ggaatgtaggtaaaGGGTca<br>cac                   |
| 44 Baat          | V\$PPAR_RXR.01 | 403  | 425  | 0.785 | 0.802 | agcactggggagacAGCTc<br>aatc                   |
| 45 2010309E21Rik | V\$PPAR_RXR.01 | 4641 | 4663 | 0.785 | 0.803 | ctttggtggccaaAGATctctt<br>gacaggggtgggaaAGCTg |
| 46 Hsd17b4       | V\$PPAR_RXR.01 | 281  | 303  | 0.785 | 0.809 | aacc<br>ggaccctgggagagAGATc                   |
| 47 Dhfs4         | V\$PPAR_RXR.01 | 3146 | 3168 | 0.785 | 0.811 | aggt<br>ggaaactgggcaagAGCTg                   |
| 48 Hspd1         | V\$PPAR_RXR.01 | 1266 | 1288 | 0.785 | 0.813 | aagc<br>aggaaaatgggaaAGATt                    |
| 49 Hsd17b4       | V\$PPAR_RXR.01 | 439  | 461  | 0.785 | 0.814 | aat<br>gactattcggtcagAGCTgag                  |
| 50 Baat          | V\$PPAR_RXR.01 | 5010 | 5032 | 0.785 | 0.815 | ga<br>tatgaatgggaaagAGCTca                    |
| 51 Acad8         | V\$PPAR_RXR.01 | 1245 | 1267 | 0.785 | 0.82  | tgg<br>ccaggagaggccaaAGCTg                    |
| 52 Samm50        | V\$PPAR_RXR.01 | 598  | 620  | 0.785 | 0.823 | aggg                                          |

|    |          |                |      |      |       |       |                                                 |
|----|----------|----------------|------|------|-------|-------|-------------------------------------------------|
| 53 | Chchd3   | V\$PPAR_RXR.01 | 1604 | 1626 | 0.785 | 0.823 | gctagcatggacaaAGCTct<br>agt                     |
| 54 | Chchd3   | V\$PPAR_RXR.01 | 1598 | 1620 | 0.785 | 0.823 | gctagcatggacaaAGCTct<br>agt                     |
| 55 | Ctsh     | V\$PPAR_RXR.01 | 2028 | 2050 | 0.785 | 0.824 | gccatcctggaagAGCTca<br>aaa                      |
| 56 | Aadat    | V\$PPAR_RXR.01 | 552  | 574  | 0.785 | 0.836 | gatgtttggccaaAGCTga<br>aga                      |
| 57 | Ndufb5   | V\$PPAR_RXR.01 | 3272 | 3294 | 0.785 | 0.838 | ggagtcatggacatAGCTca<br>gtg                     |
| 58 | Suox     | V\$PPAR_RXR.01 | 4000 | 4022 | 0.785 | 0.841 | acataaatggacaaAGATga<br>act                     |
| 59 | Pdia3    | V\$PPAR_RXR.01 | 4123 | 4145 | 0.785 | 0.842 | aaaaaaaaggtgaaAGCTg<br>agcc                     |
| 60 | Fabp1    | V\$PPAR_RXR.01 | 4792 | 4814 | 0.785 | 0.843 | ccaaccaagggcaaAGCTc<br>tctg                     |
| 61 | Idh3b    | V\$PPAR_RXR.01 | 296  | 318  | 0.785 | 0.844 | acagaaagggcatAGCTc<br>actc                      |
| 62 | Aldh5a1  | V\$PPAR_RXR.01 | 224  | 246  | 0.785 | 0.846 | tcttatggggccaaAGATgac<br>ct                     |
| 63 | Hspe1    | V\$PPAR_RXR.01 | 1128 | 1150 | 0.785 | 0.85  | aataaaaaggacaaAGATa<br>aaga                     |
| 64 | Slc25a13 | V\$PPAR_RXR.01 | 2289 | 2311 | 0.785 | 0.854 | caaacattggggaaAGCTca<br>ctg                     |
| 65 | Uox      | V\$PPAR_RXR.01 | 3184 | 3206 | 0.785 | 0.857 | gacgttcaggctaaAGATca<br>gtt                     |
| 66 | Atp5k    | V\$PPAR_RXR.01 | 241  | 263  | 0.785 | 0.858 | ctgtcccaggtcagAGCTca<br>ctg                     |
| 67 | Slc25a13 | V\$PPAR_RXR.01 | 1356 | 1378 | 0.785 | 0.86  | gagaaagaggccaaAGATg<br>aggt                     |
| 68 | Abcd3    | V\$PPAR_RXR.01 | 4400 | 4422 | 0.785 | 0.877 | atgtagtgggaaaaAGCTca<br>gag                     |
| 69 | Gpt2     | V\$PPAR_RXR.01 | 1797 | 1819 | 0.862 | 0.76  | ttatgtgaggtcgaAGTTgagt<br>g                     |
| 70 | Ctsc     | V\$PPAR_RXR.01 | 4354 | 4376 | 0.862 | 0.762 | ctttattaggattaAGTTgaatg<br>ttgcagaagtccagAGTTca |
| 71 | Immt     | V\$PPAR_RXR.01 | 1754 | 1776 | 0.862 | 0.762 | att<br>gtgaataaggaagtAGTTcat                    |
| 72 | Ndufb9   | V\$PPAR_RXR.01 | 1125 | 1147 | 0.862 | 0.764 | ct<br>atgaactgggaagAGTTgg                       |
| 73 | Aadac    | V\$PPAR_RXR.01 | 1874 | 1896 | 0.862 | 0.764 | cag<br>gaagccgaggagagAGTTc                      |
| 74 | Gcat     | V\$PPAR_RXR.01 | 1425 | 1447 | 0.862 | 0.765 | tcct                                            |
| 75 | Cox6b1   | V\$PPAR_RXR.01 | 3903 | 3925 | 0.862 | 0.765 | tgtttctggattatAGTTcattc<br>aggcagaaggagaaAGTTa  |
| 76 | Ctsc     | V\$PPAR_RXR.01 | 945  | 967  | 0.862 | 0.767 | tgaa<br>cactagaatgaaaaAGTTca                    |
| 77 | Cyc1     | V\$PPAR_RXR.01 | 4203 | 4225 | 0.862 | 0.768 | ccc<br>cttatagaggagaaAGTTgg                     |
| 78 | Maob     | V\$PPAR_RXR.01 | 2537 | 2559 | 0.862 | 0.769 | aaa<br>accaacagggtcacAGTTtc                     |
| 79 | Slc25a1  | V\$PPAR_RXR.01 | 441  | 463  | 0.862 | 0.772 | aat<br>acaagcgagctcacAGTTc                      |
| 80 | Aldh3a2  | V\$PPAR_RXR.01 | 669  | 691  | 0.862 | 0.772 | aatt                                            |

|     |          |                |      |      |       |       |                                              |
|-----|----------|----------------|------|------|-------|-------|----------------------------------------------|
| 81  | Ndufs7   | V\$PPAR_RXR.01 | 4379 | 4401 | 0.862 | 0.773 | aaatagaacgtaaaAGTTca<br>aca                  |
| 82  | Hsd17b4  | V\$PPAR_RXR.01 | 385  | 407  | 0.862 | 0.773 | acacacctggggagAGTTc<br>gaat                  |
| 83  | Acp5     | V\$PPAR_RXR.01 | 930  | 952  | 0.862 | 0.773 | ggctctgaggctgaAGTTcat<br>gg                  |
| 84  | Acp5     | V\$PPAR_RXR.01 | 2091 | 2113 | 0.862 | 0.773 | ggctctgaggctgaAGTTcat<br>gg                  |
| 85  | Ndufs7   | V\$PPAR_RXR.01 | 4733 | 4755 | 0.862 | 0.773 | aaatagaacgtaaaAGTTca<br>aca                  |
| 86  | Oat      | V\$PPAR_RXR.01 | 3770 | 3792 | 0.862 | 0.774 | cataaagagaccagAGTTc<br>aggt                  |
| 87  | Acaa1b   | V\$PPAR_RXR.01 | 1179 | 1201 | 0.862 | 0.778 | cttattaagagcaaAGTTgac<br>tg                  |
| 88  | Slc25a10 | V\$PPAR_RXR.01 | 4679 | 4701 | 0.862 | 0.781 | agcaccagggcataAGTTc<br>agac                  |
| 89  | Ndufb5   | V\$PPAR_RXR.01 | 1721 | 1743 | 0.862 | 0.781 | cgataaagggaacAGTTct<br>ctg                   |
| 90  | Ehhadh   | V\$PPAR_RXR.01 | 4076 | 4098 | 0.862 | 0.785 | catttagggaacaaAGTTca<br>aag                  |
| 91  | Slc25a13 | V\$PPAR_RXR.01 | 775  | 797  | 0.862 | 0.79  | ttttaaggaccaaAGTTcact<br>c                   |
| 92  | Hsd17b10 | V\$PPAR_RXR.01 | 3574 | 3596 | 0.862 | 0.79  | aacacaagggtcaaAGTTg<br>ctgg                  |
| 93  | Aldh3a2  | V\$PPAR_RXR.01 | 3001 | 3023 | 0.862 | 0.792 | ttaaattagctcagAGTTcac<br>ct                  |
| 94  | Chchd3   | V\$PPAR_RXR.01 | 2012 | 2034 | 0.862 | 0.794 | ttttcttggaagAGTTaaaat                        |
| 95  | Chchd3   | V\$PPAR_RXR.01 | 2006 | 2028 | 0.862 | 0.794 | ttttcttggaagAGTTaaaat<br>gctggaagggcaaaAGTTa |
| 96  | Baat     | V\$PPAR_RXR.01 | 4474 | 4496 | 0.862 | 0.8   | agac<br>aggggctggagaaAGTTa                   |
| 97  | Slc25a20 | V\$PPAR_RXR.01 | 4138 | 4160 | 0.862 | 0.801 | aagg<br>ttccctatgggaaaAGTTtac                |
| 98  | Ndufa13  | V\$PPAR_RXR.01 | 2772 | 2794 | 0.862 | 0.803 | ag<br>tttcatgaggcaaaAGTTcct                  |
| 99  | Ndufa8   | V\$PPAR_RXR.01 | 3427 | 3449 | 0.862 | 0.805 | ac<br>tttggggggaaaaAGTTaa                    |
| 100 | Gulo     | V\$PPAR_RXR.01 | 2526 | 2548 | 0.862 | 0.807 | aga<br>tgtagttgggtacAGTTtagg                 |
| 101 | Ndufa4   | V\$PPAR_RXR.01 | 2424 | 2446 | 0.862 | 0.808 | c<br>ggcgaccgggcgacAGTTg                     |
| 102 | Suox     | V\$PPAR_RXR.01 | 4849 | 4871 | 0.862 | 0.808 | acag<br>tgttaaaagtccaaAGTTcaa                |
| 103 | Cyc1     | V\$PPAR_RXR.01 | 1549 | 1571 | 0.862 | 0.809 | gg<br>gcaactgaggagaaAGTTct                   |
| 104 | Gpt2     | V\$PPAR_RXR.01 | 2771 | 2793 | 0.862 | 0.813 | ggt<br>tctctgagggacaaAGTTcc                  |
| 105 | Msra     | V\$PPAR_RXR.01 | 5528 | 5550 | 0.862 | 0.816 | cag<br>cttgaaagggaaaAGTTta                   |
| 106 | Hsd17b10 | V\$PPAR_RXR.01 | 4816 | 4838 | 0.862 | 0.817 | gat<br>attacttggtaaaAGTTaagc                 |
| 107 | Hacl1    | V\$PPAR_RXR.01 | 4301 | 4323 | 0.862 | 0.83  | a                                            |

|              |                |      |      |       |       |                                                    |
|--------------|----------------|------|------|-------|-------|----------------------------------------------------|
| 108 Nphp3    | V\$PPAR_RXR.01 | 1047 | 1069 | 0.862 | 0.839 | ctgtgagtgggtcagAGTTcag<br>cc<br>ggggggggggcagAGTTc |
| 109 Uox      | V\$PPAR_RXR.01 | 3879 | 3901 | 0.862 | 0.843 | aaga<br>gccaacaaggccatAGTTct                       |
| 110 Cox5b    | V\$PPAR_RXR.01 | 3157 | 3179 | 0.862 | 0.843 | taa<br>gaactccagggtgacAGTTca                       |
| 111 Peci     | V\$PPAR_RXR.01 | 3062 | 3084 | 0.862 | 0.845 | aac<br>gaactccagggtgacAGTTca                       |
| 112 Peci     | V\$PPAR_RXR.01 | 3073 | 3095 | 0.862 | 0.845 | aac<br>ggtaggagggtgaaAGTTtat                       |
| 113 Aldh3a2  | V\$PPAR_RXR.01 | 401  | 423  | 0.862 | 0.847 | gc<br>agggatagggtcacAGTTca                         |
| 114 Coq9     | V\$PPAR_RXR.01 | 3575 | 3597 | 0.862 | 0.865 | gtg<br>atcttttaggacaaAGTTtaag                      |
| 115 Ctsa     | V\$PPAR_RXR.01 | 2256 | 2278 | 0.862 | 0.866 | t<br>atcttttaggacaaAGTTtaag                        |
| 116 Ctsa     | V\$PPAR_RXR.01 | 2228 | 2250 | 0.862 | 0.866 | t<br>aaggggcagggcaaAGTTc                           |
| 117 Ak2      | V\$PPAR_RXR.01 | 3577 | 3599 | 0.862 | 0.904 | agtc<br>agcagaaagggtcaaAGTTc                       |
| 118 Ctsb     | V\$PPAR_RXR.01 | 3032 | 3054 | 0.862 | 0.913 | aaga<br>cagtgaggggacAAAGgga                        |
| 119 Lamp2    | V\$PPAR_RXR.02 | 805  | 827  | 1     | 0.69  | ttga<br>ggatttgagttcAAAGgcagc                      |
| 120 Slc25a10 | V\$PPAR_RXR.02 | 2066 | 2088 | 1     | 0.69  | ct<br>taggatgacgtcAAAGctaca                        |
| 121 Abcd3    | V\$PPAR_RXR.02 | 3580 | 3602 | 1     | 0.69  | cc                                                 |
| 122 Actg1    | V\$PPAR_RXR.02 | 936  | 958  | 1     | 0.69  | gcattcaggctcAAAGattatt<br>tccccagggtcAAAGctaca     |
| 123 Ctsd     | V\$PPAR_RXR.02 | 4016 | 4038 | 1     | 0.69  | at<br>cccgaagagagcAAAGctta                         |
| 124 Ctsd     | V\$PPAR_RXR.02 | 4990 | 5012 | 1     | 0.69  | aag<br>ggtaaagggttaAAAGggag                        |
| 125 Ndufa8   | V\$PPAR_RXR.02 | 3640 | 3662 | 1     | 0.69  | cct<br>tgcttagagatgAAAGggga                        |
| 126 Hint2    | V\$PPAR_RXR.02 | 2598 | 2620 | 1     | 0.691 | agt<br>agtgctgaggttAAAGgcacc                       |
| 127 Abat     | V\$PPAR_RXR.02 | 3881 | 3903 | 1     | 0.691 | ac<br>ccaatgaggtcAAAGtcgtg                         |
| 128 Suox     | V\$PPAR_RXR.02 | 2275 | 2297 | 1     | 0.691 | ta<br>agtgctgggatcAAAGgcgtg                        |
| 129 Ctsa     | V\$PPAR_RXR.02 | 4528 | 4550 | 1     | 0.692 | tg<br>gccccagggtttAAAGctcac                        |
| 130 Agmat    | V\$PPAR_RXR.02 | 2019 | 2041 | 1     | 0.692 | aa<br>aactccgggattAAAGgaga                         |
| 131 Ndufb5   | V\$PPAR_RXR.02 | 2907 | 2929 | 1     | 0.692 | gag<br>agtgctgggatcAAAGgcgtg                       |
| 132 Ctsa     | V\$PPAR_RXR.02 | 4500 | 4522 | 1     | 0.692 | tg<br>aatattggactaAAAGgtgag                        |
| 133 Aadac    | V\$PPAR_RXR.02 | 4359 | 4381 | 1     | 0.693 | aa<br>agtgctaggattAAAGgtggg                        |
| 134 Hspe1    | V\$PPAR_RXR.02 | 858  | 880  | 1     | 0.693 | ca                                                 |

|                   |                |      |      |   |       |                                                     |
|-------------------|----------------|------|------|---|-------|-----------------------------------------------------|
| 135 Gcat          | V\$PPAR_RXR.02 | 1872 | 1894 | 1 | 0.694 | gggggaaggacAAAGtttg<br>aaa<br>gcttaaaggatcAAAGattca |
| 136 Gpt2          | V\$PPAR_RXR.02 | 1536 | 1558 | 1 | 0.694 | gt<br>gagtaggggaccAAAGatta                          |
| 137 Maob          | V\$PPAR_RXR.02 | 4692 | 4714 | 1 | 0.694 | aga<br>aatgctgagattAAAGgtgtat                       |
| 138 Dmgdh         | V\$PPAR_RXR.02 | 3387 | 3409 | 1 | 0.695 | a<br>cacttggggaacAAAGttgat                          |
| 139 2010309E21Rik | V\$PPAR_RXR.02 | 368  | 390  | 1 | 0.695 | gg<br>gaacccgagctcAAAGctgg                          |
| 140 Ndufa10       | V\$PPAR_RXR.02 | 4705 | 4727 | 1 | 0.696 | gag<br>agagcagaggtgAAAGggt                          |
| 141 Hint2         | V\$PPAR_RXR.02 | 1719 | 1741 | 1 | 0.696 | cagg<br>cccaggggagtcAAAGatgt                        |
| 142 Acaa1a        | V\$PPAR_RXR.02 | 365  | 387  | 1 | 0.697 | aga<br>agtgctgggattAAAGgtatgt                       |
| 143 Slc25a1       | V\$PPAR_RXR.02 | 1855 | 1877 | 1 | 0.699 | g<br>agtgctgggattAAAGgtatgt                         |
| 144 Sod1          | V\$PPAR_RXR.02 | 2847 | 2869 | 1 | 0.699 | a<br>agagccgggattAAAGgtgt                           |
| 145 Hsd17b4       | V\$PPAR_RXR.02 | 1311 | 1333 | 1 | 0.699 | gta<br>taaggagagctcAAAGttag                         |
| 146 1100001H23Rik | V\$PPAR_RXR.02 | 2518 | 2540 | 1 | 0.699 | ggt<br>agtgctgggattAAAGgtatgt                       |
| 147 Cyp2e1        | V\$PPAR_RXR.02 | 1558 | 1580 | 1 | 0.699 | g<br>agtgctgggattAAAGgtgtgt                         |
| 148 Ctsa          | V\$PPAR_RXR.02 | 3580 | 3602 | 1 | 0.7   | g<br>aatgctgggattAAAGgtgtgt                         |
| 149 Ctsa          | V\$PPAR_RXR.02 | 3719 | 3741 | 1 | 0.7   | g                                                   |
| 150 Gpt2          | V\$PPAR_RXR.02 | 3836 | 3858 | 1 | 0.7   | ttatctgggattAAAGgtgtgtg<br>tgtgctgggattAAAGgtgtgt   |
| 151 Agmat         | V\$PPAR_RXR.02 | 3599 | 3621 | 1 | 0.7   | g<br>agtgctgggattAAAGgtgtgt                         |
| 152 Ctsa          | V\$PPAR_RXR.02 | 3552 | 3574 | 1 | 0.7   | g<br>aatgctgggattAAAGgtgtgt                         |
| 153 Ctsa          | V\$PPAR_RXR.02 | 3691 | 3713 | 1 | 0.7   | g<br>gctcctgggattAAAGgtgtgt                         |
| 154 2810422J05Rik | V\$PPAR_RXR.02 | 918  | 940  | 1 | 0.7   | g<br>agtgctgggattAAAGgtgtgt                         |
| 155 Ndufa8        | V\$PPAR_RXR.02 | 3226 | 3248 | 1 | 0.7   | g<br>agcactgggattAAAGgtgtg                          |
| 156 Ndufa13       | V\$PPAR_RXR.02 | 430  | 452  | 1 | 0.7   | tg<br>aatgctgggattAAAGgtgtgt                        |
| 157 Cyp2a22       | V\$PPAR_RXR.02 | 3829 | 3851 | 1 | 0.7   | g<br>agtgctgggattAAAGgtgtgt                         |
| 158 1110020G09Rik | V\$PPAR_RXR.02 | 660  | 682  | 1 | 0.7   | g<br>gccatagggattAAAGgtatg                          |
| 159 Peci          | V\$PPAR_RXR.02 | 384  | 406  | 1 | 0.701 | tc<br>agtcctgggattAAAGgtgtg                         |
| 160 Aldh1b1       | V\$PPAR_RXR.02 | 177  | 199  | 1 | 0.701 | gg<br>gccatagggattAAAGgtatg                         |
| 161 Peci          | V\$PPAR_RXR.02 | 395  | 417  | 1 | 0.701 | tc                                                  |

|     |               |                |      |      |   |       |                                                 |
|-----|---------------|----------------|------|------|---|-------|-------------------------------------------------|
| 162 | Cox6b1        | V\$PPAR_RXR.02 | 210  | 232  | 1 | 0.701 | aatgctgggattAAAGgtatg<br>cg                     |
| 163 | Opa1          | V\$PPAR_RXR.02 | 357  | 379  | 1 | 0.701 | tctgctgggattAAAGgtatgc<br>g                     |
| 164 | P4hb          | V\$PPAR_RXR.02 | 3042 | 3064 | 1 | 0.702 | aatactgggattAAAGgtgtg<br>cc                     |
| 165 | Vdac2         | V\$PPAR_RXR.02 | 4078 | 4100 | 1 | 0.702 | agtgtgggattAAAGgtgtg<br>ca                      |
| 166 | Slc25a10      | V\$PPAR_RXR.02 | 194  | 216  | 1 | 0.702 | atggtggggctcAAAGctggg<br>ac                     |
| 167 | Slc25a10      | V\$PPAR_RXR.02 | 844  | 866  | 1 | 0.702 | agtgtgggattAAAGgtgtg<br>ca                      |
| 168 | Ndufb9        | V\$PPAR_RXR.02 | 1413 | 1435 | 1 | 0.702 | ttgttgggattAAAGgtgtgca<br>agtgtgggattAAAGgtgtg  |
| 169 | Gpt2          | V\$PPAR_RXR.02 | 3561 | 3583 | 1 | 0.702 | ca<br>agtgtgggattAAAGgtgtg                      |
| 170 | Ctsh          | V\$PPAR_RXR.02 | 4493 | 4515 | 1 | 0.702 | cg                                              |
| 171 | Acox1         | V\$PPAR_RXR.02 | 3576 | 3598 | 1 | 0.702 | agtgtgggattAAAGgtgtg<br>cg                      |
| 172 | Timm8a1       | V\$PPAR_RXR.02 | 3074 | 3096 | 1 | 0.702 | aatgctgggattAAAGgtgtg<br>ca                     |
| 173 | Oat           | V\$PPAR_RXR.02 | 4029 | 4051 | 1 | 0.702 | agtcctgggattAAAGgtgtgc<br>a                     |
| 174 | 1300010F03Rik | V\$PPAR_RXR.02 | 1545 | 1567 | 1 | 0.703 | agtgtgggattAAAGgtgta<br>ga                      |
| 175 | Acad8         | V\$PPAR_RXR.02 | 1749 | 1771 | 1 | 0.703 | agtgtgggattAAAGgtgta<br>cg                      |
| 176 | Es31          | V\$PPAR_RXR.02 | 2538 | 2560 | 1 | 0.706 | ttcacctcaaccAAAGgtcatt<br>c                     |
| 177 | Es31          | V\$PPAR_RXR.02 | 2538 | 2560 | 1 | 0.706 | ttcacctcaaccAAAGgtcatt<br>c                     |
| 178 | Timm8a1       | V\$PPAR_RXR.02 | 4052 | 4074 | 1 | 0.707 | actgcttaagcAAAGgtcaa<br>gg                      |
| 179 | 2010309E21Rik | V\$PPAR_RXR.02 | 3808 | 3830 | 1 | 0.707 | acagcttttctcAAAGgacaat<br>g                     |
| 180 | Agmat         | V\$PPAR_RXR.02 | 4876 | 4898 | 1 | 0.708 | aataggacagccAAAGgcc<br>aggt                     |
| 181 | Ak2           | V\$PPAR_RXR.02 | 2025 | 2047 | 1 | 0.709 | ttatagccagttAAAGgccag<br>cc                     |
| 182 | Ppt1          | V\$PPAR_RXR.02 | 1514 | 1536 | 1 | 0.711 | ttgtgaccctgcAAAGgtcatg<br>a                     |
| 183 | Hibadh        | V\$PPAR_RXR.02 | 3493 | 3515 | 1 | 0.716 | actttgcttttAAAGgtcaaac                          |
| 184 | Acot2         | V\$PPAR_RXR.02 | 2112 | 2134 | 1 | 0.718 | aaacaatttctcAAAGttcagtt<br>tcaaggatagttAAAGggca |
| 185 | Cpox          | V\$PPAR_RXR.02 | 4437 | 4459 | 1 | 0.718 | aat<br>aggggactgttcAAAGggcg                     |
| 186 | Dhrs4         | V\$PPAR_RXR.02 | 5046 | 5068 | 1 | 0.719 | gga                                             |
| 187 | Ephx2         | V\$PPAR_RXR.02 | 653  | 675  | 1 | 0.719 | agctcttctatcAAAGttcatga                         |

Varanasi, U. et al. (1996). *J Biol Chem* **271**, 2147-2155



|     |          |                |      |      |   |       |                                                  |
|-----|----------|----------------|------|------|---|-------|--------------------------------------------------|
| 188 | Vd3c     | V\$PPAR_RXR.02 | 2751 | 2773 | 1 | 0.721 | aaagctctggtgAAAGccca<br>cta                      |
| 189 | Vd3c     | V\$PPAR_RXR.02 | 2733 | 2755 | 1 | 0.721 | aaagctctggtgAAAGccca<br>cta                      |
| 190 | Slc25a13 | V\$PPAR_RXR.02 | 2153 | 2175 | 1 | 0.723 | aatcggatcattAAAGgtcatg<br>g                      |
| 191 | Cyp2a22  | V\$PPAR_RXR.02 | 971  | 993  | 1 | 0.723 | ttcatactcatcAAAGgtaaaa<br>t                      |
| 192 | Ctsd     | V\$PPAR_RXR.02 | 238  | 260  | 1 | 0.724 | gaactcttagttAAAGgtgatt<br>a                      |
| 193 | Hibadh   | V\$PPAR_RXR.02 | 3712 | 3734 | 1 | 0.725 | ctacttttctcAAAGgttacia<br>ttattactggtcAAAGgagtgt |
| 194 | Aldh1b1  | V\$PPAR_RXR.02 | 4203 | 4225 | 1 | 0.725 | g<br>cagcatctgctaAAAGgtcta                       |
| 195 | Hspe1    | V\$PPAR_RXR.02 | 3450 | 3472 | 1 | 0.725 | ca<br>aaatagtgaacAAAGgccca                       |
| 196 | Ndufa4   | V\$PPAR_RXR.02 | 1064 | 1086 | 1 | 0.726 | ata<br>gtcacagcaagcAAAGgtca                      |
| 197 | Hsd17b10 | V\$PPAR_RXR.02 | 2809 | 2831 | 1 | 0.727 | gca                                              |

Varanasi, U. et al. (1996). *J Biol Chem* **271**, 2147-2156

|     |        |                |      |      |   |       |                                                   |
|-----|--------|----------------|------|------|---|-------|---------------------------------------------------|
| 198 | Acox1  | V\$PPAR_RXR.02 | 296  | 318  | 1 | 0.728 | caggagatggtgAAAGgacc<br>ccc                       |
| 199 | Baat   | V\$PPAR_RXR.02 | 4834 | 4856 | 1 | 0.729 | actgttgctgctAAAGaccag<br>ag                       |
| 200 | Ndufa4 | V\$PPAR_RXR.02 | 2162 | 2184 | 1 | 0.729 | agtcacctgatcAAAGctgat<br>gc                       |
| 201 | Scpep1 | V\$PPAR_RXR.02 | 312  | 334  | 1 | 0.731 | cactaagctgacAAAGatca<br>gcc                       |
| 202 | P4hb   | V\$PPAR_RXR.02 | 2755 | 2777 | 1 | 0.731 | gtacaattgctcAAAGttcgag<br>a                       |
| 203 | Gpt2   | V\$PPAR_RXR.02 | 1438 | 1460 | 1 | 0.731 | gcacagtgactcAAAGgaca<br>gtg                       |
| 204 | Ak2    | V\$PPAR_RXR.02 | 733  | 755  | 1 | 0.731 | ctctccctgctcAAAGgtagca<br>c                       |
| 205 | Uqcrq  | V\$PPAR_RXR.02 | 3205 | 3227 | 1 | 0.734 | tttaattgctcAAAGttaaagg                            |
| 206 | Gulo   | V\$PPAR_RXR.02 | 949  | 971  | 1 | 0.734 | ttgtaaactgttAAAGgtaatta<br>cacataattgtaAAAGgtaaaa |
| 207 | Cycs   | V\$PPAR_RXR.02 | 148  | 170  | 1 | 0.734 | ag                                                |
| 208 | Uqcrq  | V\$PPAR_RXR.02 | 3189 | 3211 | 1 | 0.734 | tttaattgctcAAAGttaaagg                            |

Girnun, G. D., et al. (2002). *Molecular Endocrinology* **16**, 2793-2801

|     |           |                |      |      |   |       |                             |
|-----|-----------|----------------|------|------|---|-------|-----------------------------|
| 209 | Cat       | V\$PPAR_RXR.02 | 2595 | 2617 | 1 | 0.735 | aaagaattgctcAAAGttgaa<br>ca |
| 210 | Opa1      | V\$PPAR_RXR.02 | 2049 | 2071 | 1 | 0.735 | acaataaaaacAAAGgtca<br>ttc  |
| 211 | Nipsnap3a | V\$PPAR_RXR.02 | 3972 | 3994 | 1 | 0.735 | aaaggacggaacAAAGgac<br>aata |

|              |                |      |      |   |       |                                               |
|--------------|----------------|------|------|---|-------|-----------------------------------------------|
| 212 Gcdh     | V\$PPAR_RXR.02 | 2470 | 2492 | 1 | 0.736 | ggcagacatgtgAAAGgccacat                       |
| 213 Hsd17b10 | V\$PPAR_RXR.02 | 378  | 400  | 1 | 0.736 | tctcaacaaatcAAAGatcagtg                       |
| 214 Gcdh     | V\$PPAR_RXR.02 | 2470 | 2492 | 1 | 0.736 | ggcagacatgtgAAAGgccacat                       |
| 215 Msra     | V\$PPAR_RXR.02 | 821  | 843  | 1 | 0.736 | aagccctaccttAAAGgtcaaat                       |
| 216 Slc25a5  | V\$PPAR_RXR.02 | 4087 | 4109 | 1 | 0.737 | cttgaaagtccAAAGgacagac                        |
| 217 Tmprss13 | V\$PPAR_RXR.02 | 3856 | 3878 | 1 | 0.737 | tctgttatctaAAAGgtcaagaagaagtttcAAAGctcag      |
| 218 Gpt2     | V\$PPAR_RXR.02 | 809  | 831  | 1 | 0.737 | atggtgggtaatcAAAGtcaaac                       |
| 219 Atp5j    | V\$PPAR_RXR.02 | 4962 | 4984 | 1 | 0.737 | ac                                            |
| 220 Gpt2     | V\$PPAR_RXR.02 | 316  | 338  | 1 | 0.738 | tcagagaaggatAAAGgacagcg                       |
| 221 Mut      | V\$PPAR_RXR.02 | 4268 | 4290 | 1 | 0.738 | ttcgctgacagctcAAAGaaca                        |
| 222 Ndufb9   | V\$PPAR_RXR.02 | 3796 | 3818 | 1 | 0.739 | tttcattcgtgagttAAAGgacatc                     |
| 223 Dhfr4    | V\$PPAR_RXR.02 | 3114 | 3136 | 1 | 0.739 | cttctagccatcAAAGttcact                        |
| 224 Scp2     | V\$PPAR_RXR.02 | 837  | 859  | 1 | 0.739 | aaagacagatcAAAGgcgatgc                        |
| 225 Baat     | V\$PPAR_RXR.02 | 3401 | 3423 | 1 | 0.741 | ttctcctgcctcAAAGgtctgg                        |
| 226 Mut      | V\$PPAR_RXR.02 | 2764 | 2786 | 1 | 0.741 | cttaagcatttcAAAGgtaattttctagaagccAAAGgacag    |
| 227 Timm13   | V\$PPAR_RXR.02 | 4740 | 4762 | 1 | 0.742 | tg                                            |
| 228 Atp5j    | V\$PPAR_RXR.02 | 1608 | 1630 | 1 | 0.743 | tctctatatgtaAAAGctcacat                       |
| 229 Atp5j    | V\$PPAR_RXR.02 | 273  | 295  | 1 | 0.743 | tctctatatgtaAAAGctcacat                       |
| 230 Atp5j    | V\$PPAR_RXR.02 | 1537 | 1559 | 1 | 0.743 | tctctatatgtaAAAGctcacatgatctctgagttAAAGatcagc |
| 231 Gcdh     | V\$PPAR_RXR.02 | 962  | 984  | 1 | 0.745 | caggccaaggcacAAAGggc                          |
| 232 Phyh     | V\$PPAR_RXR.02 | 3896 | 3918 | 1 | 0.745 | aaatgatctctgagttAAAGatcagc                    |
| 233 Gcdh     | V\$PPAR_RXR.02 | 962  | 984  | 1 | 0.745 | cgtccaggagcccAAAGgac                          |
| 234 Ctsa     | V\$PPAR_RXR.02 | 1042 | 1064 | 1 | 0.746 | aaactgtccaggagcccAAAGgac                      |
| 235 Ctsa     | V\$PPAR_RXR.02 | 1014 | 1036 | 1 | 0.746 | aaactgtccaggagcccAAAGgac                      |
| 236 Immt     | V\$PPAR_RXR.02 | 3053 | 3075 | 1 | 0.746 | ga                                            |
| 237 Atp5d    | V\$PPAR_RXR.02 | 635  | 657  | 1 | 0.747 | ggggctgcagttAAAGgttat                         |
| 238 Lamp2    | V\$PPAR_RXR.02 | 262  | 284  | 1 | 0.747 | gagaaagtggcAAAGtagaggt                        |

|              |                |      |      |   |       |                                                |
|--------------|----------------|------|------|---|-------|------------------------------------------------|
| 239 Hsd17b4  | V\$PPAR_RXR.02 | 3768 | 3790 | 1 | 0.747 | gcctcaacttcAAAGttcaca<br>t                     |
| 240 Atp5d    | V\$PPAR_RXR.02 | 1569 | 1591 | 1 | 0.747 | tggtgggagtgAAAAGgaca<br>aaa                    |
| 241 Cyp2a22  | V\$PPAR_RXR.02 | 890  | 912  | 1 | 0.747 | ttagtaaagctcAAAGcacac<br>at                    |
| 242 Ndufb5   | V\$PPAR_RXR.02 | 1103 | 1125 | 1 | 0.747 | taagagtgtgttAAAGctcatg<br>a                    |
| 243 Hibadh   | V\$PPAR_RXR.02 | 2011 | 2033 | 1 | 0.748 | aggcaaaggtAAAAGgac<br>tgtg                     |
| 244 Fabp1    | V\$PPAR_RXR.02 | 1824 | 1846 | 1 | 0.748 | gcaaagtggtcAAAGgata<br>atg                     |
| 245 Lamp2    | V\$PPAR_RXR.02 | 2197 | 2219 | 1 | 0.749 | tgcgactagttcAAAGgtatta<br>ctgtaaagagtcAAAGtaca |
| 246 Vapa     | V\$PPAR_RXR.02 | 1282 | 1304 | 1 | 0.749 | ta<br>cccaggaatgtgAAAGatca                     |
| 247 Slc25a13 | V\$PPAR_RXR.02 | 2443 | 2465 | 1 | 0.75  | aac<br>atggtaaagatcAAAGggaa                    |
| 248 Nphp3    | V\$PPAR_RXR.02 | 2328 | 2350 | 1 | 0.75  | atg<br>ggcagaaggacAAAGtcc                      |
| 249 Aadat    | V\$PPAR_RXR.02 | 4926 | 4948 | 1 | 0.751 | atcc<br>caggcaggagccAAAGgcc                    |
| 250 Scep1    | V\$PPAR_RXR.02 | 5010 | 5032 | 1 | 0.752 | atcg<br>cctgtatgagtgAAAGgtctg                  |
| 251 Acad8    | V\$PPAR_RXR.02 | 2593 | 2615 | 1 | 0.752 | a<br>tacagggatgtcAAAGgcaa                      |
| 252 Coq9     | V\$PPAR_RXR.02 | 1858 | 1880 | 1 | 0.753 | ggc<br>tagtaggaaataAAAGgtcat                   |
| 253 Acot2    | V\$PPAR_RXR.02 | 1359 | 1381 | 1 | 0.755 | aa<br>cactcaagaatgAAAGgtcat                    |
| 254 Idh3b    | V\$PPAR_RXR.02 | 2097 | 2119 | 1 | 0.755 | tc<br>catctgaagtgAAAGgaaa                      |
| 255 Agmat    | V\$PPAR_RXR.02 | 2094 | 2116 | 1 | 0.755 | taa<br>cagcctagggtAAAAGagca                    |
| 256 Hint2    | V\$PPAR_RXR.02 | 1271 | 1293 | 1 | 0.756 | ccc<br>cattgggaattcAAAGgtccc                   |
| 257 Ephx2    | V\$PPAR_RXR.02 | 1392 | 1414 | 1 | 0.756 | at<br>ggatcaggggatAAAGgac                      |
| 258 Es31     | V\$PPAR_RXR.02 | 4816 | 4838 | 1 | 0.757 | agtc<br>ggatcaggggatAAAGgac                    |
| 259 Es31     | V\$PPAR_RXR.02 | 4816 | 4838 | 1 | 0.757 | agtc<br>catatgtggatcAAAGcttata                 |
| 260 Tomm70a  | V\$PPAR_RXR.02 | 2574 | 2596 | 1 | 0.758 | a<br>agaccaggagcAAAGctc                        |
| 261 Abcd3    | V\$PPAR_RXR.02 | 1864 | 1886 | 1 | 0.758 | agga<br>agaactgatatcAAAGttcaa                  |
| 262 Kmo      | V\$PPAR_RXR.02 | 2260 | 2282 | 1 | 0.758 | at<br>agggaggagttcAAAGtgca                     |
| 263 Ppt1     | V\$PPAR_RXR.02 | 528  | 550  | 1 | 0.759 | tat<br>ggtctggggattAAAGgaca                    |
| 264 Cox5b    | V\$PPAR_RXR.02 | 1771 | 1793 | 1 | 0.76  | atg<br>tggaaatagaacatAGGTcc                    |
| 265 Cyp4a14  | V\$PPAR_RXR.01 | 3078 | 3100 | 1 | 0.761 | cct                                            |

|     |           |                |      |      |   |       |                                                      |                                                                                           |
|-----|-----------|----------------|------|------|---|-------|------------------------------------------------------|-------------------------------------------------------------------------------------------|
| 266 | Agmat     | V\$PPAR_RXR.01 | 2623 | 2645 | 1 | 0.761 | agtgcagaggttacAGGTgt<br>gca<br>gcggatggtctcAAAGatcag |                                                                                           |
| 267 | Aldh3a2   | V\$PPAR_RXR.02 | 3682 | 3704 | 1 | 0.761 | aa<br>tgaccttagcacaaaAGGTcgt                         |                                                                                           |
| 268 | Agmat     | V\$PPAR_RXR.01 | 3470 | 3492 | 1 | 0.762 | gc<br>gcagaagaggggagAGGT                             |                                                                                           |
| 269 | Hint2     | V\$PPAR_RXR.01 | 2290 | 2312 | 1 | 0.762 | gcttg                                                |                                                                                           |
| 270 | Cpt2      | V\$PPAR_RXR.02 | 3102 | 3124 | 1 | 0.762 | agggctgggattAAAGgccca<br>gca                         | Barrero M. J.<br>et al. (2003)<br><i>Biochem. J.</i><br><b>369</b> , 721–729              |
| 271 | Cpt1a     | V\$PPAR_RXR.01 | 4857 | 4879 | 1 | 0.763 | gggctgcggggaggAGGTc<br>agta                          | Louet, et al.<br>(2001)<br><i>Biochem J</i><br><b>354</b> , 189-197                       |
| 272 | Coq9      | V\$PPAR_RXR.01 | 495  | 517  | 1 | 0.763 | attactagggttacAGGTatg<br>ca                          |                                                                                           |
| 273 | Hint2     | V\$PPAR_RXR.01 | 1224 | 1246 | 1 | 0.763 | gtgtgtaaggaaaAGGTga<br>ggt                           |                                                                                           |
| 274 | Suox      | V\$PPAR_RXR.01 | 1552 | 1574 | 1 | 0.763 | gatcaaaagaaaaAGGTa<br>acgg                           |                                                                                           |
| 275 | Por       | V\$PPAR_RXR.02 | 1631 | 1653 | 1 | 0.763 | agtactgagattAAAGgtctg<br>ag                          |                                                                                           |
| 276 | Slc25a10  | V\$PPAR_RXR.01 | 2886 | 2908 | 1 | 0.764 | gttttctgagctagAGGTcag<br>at                          |                                                                                           |
| 277 | Sod1      | V\$PPAR_RXR.01 | 3274 | 3296 | 1 | 0.764 | tatggaatgagcaaAGGTta<br>caa                          |                                                                                           |
| 278 | Ctsh      | V\$PPAR_RXR.01 | 990  | 1012 | 1 | 0.764 | ttgttcaggtgacAGGTggg<br>at                           |                                                                                           |
| 279 | Actg1     | V\$PPAR_RXR.01 | 1713 | 1735 | 1 | 0.764 | cataacagggagcaAGGTc<br>ctga                          |                                                                                           |
| 280 | Dld       | V\$PPAR_RXR.01 | 3095 | 3117 | 1 | 0.764 | aacggcatgggagcAGGTc<br>aggg                          |                                                                                           |
| 281 | Uqcrq     | V\$PPAR_RXR.01 | 3199 | 3221 | 1 | 0.764 | ttgctcaaagttaaAGGTgat<br>gt                          |                                                                                           |
| 282 | Uqcrq     | V\$PPAR_RXR.01 | 3183 | 3205 | 1 | 0.764 | ttgctcaaagttaaAGGTgat<br>gt                          |                                                                                           |
| 283 | Nipsnap3a | V\$PPAR_RXR.01 | 826  | 848  | 1 | 0.764 | cttactcaggaacaAGGTaa<br>ata                          |                                                                                           |
| 284 | Por       | V\$PPAR_RXR.01 | 4067 | 4089 | 1 | 0.765 | ccttcagtggccagAGGTgg<br>gac                          |                                                                                           |
| 285 | Nipsnap3a | V\$PPAR_RXR.01 | 4553 | 4575 | 1 | 0.765 | tcagaggccgtcagAGGTca<br>gct                          |                                                                                           |
| 286 | Scepep1   | V\$PPAR_RXR.02 | 410  | 432  | 1 | 0.765 | ggttttgagttcAAAGttctgta                              |                                                                                           |
| 287 | Acox1     | V\$PPAR_RXR.02 | 19   | 41   | 1 | 0.765 | agtgctaggatcAAAGgtgtg<br>ca                          | Varanasi, U. et<br>al. (1996). <i>J</i><br><i>Biol Chem</i><br><b>271</b> , 2147-<br>2157 |
| 288 | Fabp1     | V\$PPAR_RXR.01 | 2592 | 2614 | 1 | 0.766 | tctcatcatgccaagAGGTaat<br>ga                         |                                                                                           |
| 289 | Aldh3a2   | V\$PPAR_RXR.01 | 1528 | 1550 | 1 | 0.766 | gctgccttggttaAGGTtatt                                |                                                                                           |

|     |               |                |      |      |   |       |                                                     |
|-----|---------------|----------------|------|------|---|-------|-----------------------------------------------------|
| 290 | Ndufa10       | V\$PPAR_RXR.02 | 3003 | 3025 | 1 | 0.766 | agcatagaagtcAAAGctga<br>ata<br>gagagctggctcagAGGTta |
| 291 | Scp2          | V\$PPAR_RXR.01 | 1035 | 1057 | 1 | 0.767 | aga<br>cctgataccgtcagAGGTca                         |
| 292 | Ndufb5        | V\$PPAR_RXR.01 | 3999 | 4021 | 1 | 0.767 | agg<br>ctcaactgtgctaaAGGTcttt                       |
| 293 | 1300010F03Rik | V\$PPAR_RXR.01 | 4800 | 4822 | 1 | 0.767 | g<br>gagactggggtagAGGTg                             |
| 294 | Atp5d         | V\$PPAR_RXR.01 | 790  | 812  | 1 | 0.767 | ggat<br>agtgtaggggtgtAGGTca                         |
| 295 | Uqcrq         | V\$PPAR_RXR.01 | 3541 | 3563 | 1 | 0.767 | gaa<br>agtgtaggggtgtAGGTca                          |
| 296 | Uqcrq         | V\$PPAR_RXR.01 | 3525 | 3547 | 1 | 0.767 | gaa<br>aatactgggatcAAAGgcaa                         |
| 297 | 1300010F03Rik | V\$PPAR_RXR.02 | 430  | 452  | 1 | 0.767 | aga<br>tctgtcaggaacaAGGTga                          |
| 298 | Decr2         | V\$PPAR_RXR.01 | 2898 | 2920 | 1 | 0.769 | ccg<br>gctctgtggagaacAGGTca                         |
| 299 | Hacl1         | V\$PPAR_RXR.01 | 3196 | 3218 | 1 | 0.77  | cta<br>tgtgtaggggtcagAGGTca                         |
| 300 | Idh3b         | V\$PPAR_RXR.01 | 425  | 447  | 1 | 0.77  | ata                                                 |
| 301 | Fabp1         | V\$PPAR_RXR.02 | 4448 | 4470 | 1 | 0.77  | ggtttgagttcAAAGgtatttc<br>cctagcatgtgcaaAGGTcc      |
| 302 | 2810422J05Rik | V\$PPAR_RXR.01 | 1738 | 1760 | 1 | 0.771 | cag<br>gttgccaggctagAGGTgc                          |
| 303 | Slc25a1       | V\$PPAR_RXR.01 | 3731 | 3753 | 1 | 0.772 | agc<br>ttttgaggggtacAGGTgga                         |
| 304 | Lonp1         | V\$PPAR_RXR.01 | 2670 | 2692 | 1 | 0.772 | aa<br>gagcatgaggcaggAGGTc                           |
| 305 | Ndufc2        | V\$PPAR_RXR.01 | 2329 | 2351 | 1 | 0.772 | atga<br>accaggctggtggcAGGTca                        |
| 306 | Acp5          | V\$PPAR_RXR.01 | 3520 | 3542 | 1 | 0.772 | gcg<br>accaggctggtggcAGGTca                         |
| 307 | Acp5          | V\$PPAR_RXR.01 | 4681 | 4703 | 1 | 0.772 | gcg<br>tgggaggagacaaaAGGTt                          |
| 308 | Gpx1          | V\$PPAR_RXR.01 | 3758 | 3780 | 1 | 0.772 | agtc<br>aactcaagcggacAGGTc                          |
| 309 | Cox5b         | V\$PPAR_RXR.01 | 4749 | 4771 | 1 | 0.772 | atga<br>caaagtggctaAAAGttcag                        |
| 310 | Cyp4a14       | V\$PPAR_RXR.02 | 3518 | 3540 | 1 | 0.772 | ac<br>ctaaattctgtaaaAGGTgaa                         |
| 311 | Vdac2         | V\$PPAR_RXR.01 | 3723 | 3745 | 1 | 0.773 | ga                                                  |
| 312 | Cat           | V\$PPAR_RXR.01 | 166  | 188  | 1 | 0.773 | aggactggggttacAGGTgt<br>gtg                         |
| 313 | Immt          | V\$PPAR_RXR.01 | 2362 | 2384 | 1 | 0.773 | ccagacatgccaacAGGTc<br>agtc                         |
| 314 | Acad8         | V\$PPAR_RXR.01 | 456  | 478  | 1 | 0.773 | attctggggccagAGGTgttc<br>t                          |
| 315 | 2810422J05Rik | V\$PPAR_RXR.02 | 4093 | 4115 | 1 | 0.773 | tgtgtgggatcAAAGgtatgt<br>a                          |

Girnun, G. D.,  
et al. (2002).  
*Molecular  
Endocrinology*  
**16**, 2793-2802

|                   |                |      |      |   |       |                                                     |
|-------------------|----------------|------|------|---|-------|-----------------------------------------------------|
| 316 Samm50        | V\$PPAR_RXR.01 | 3233 | 3255 | 1 | 0.774 | cacatataggtgagAGGTat<br>act<br>tgaagagtggacccAGGTca |
| 317 Coq9          | V\$PPAR_RXR.01 | 3614 | 3636 | 1 | 0.774 | tgc<br>ggtaccaagcacagAGGTg                          |
| 318 Actg1         | V\$PPAR_RXR.01 | 2597 | 2619 | 1 | 0.774 | accg<br>catcagacaggcatAGGTca                        |
| 319 Fabp1         | V\$PPAR_RXR.01 | 1162 | 1184 | 1 | 0.774 | cct<br>ggcagcttgaaagAGGTtt                          |
| 320 0610010D20Rik | V\$PPAR_RXR.01 | 805  | 827  | 1 | 0.774 | cag<br>aaatgaggagtcAAAGatta                         |
| 321 Ndufs2        | V\$PPAR_RXR.02 | 2802 | 2824 | 1 | 0.774 | cta<br>agctcagggatgAAAGctca                         |
| 322 Ctsd          | V\$PPAR_RXR.02 | 3368 | 3390 | 1 | 0.774 | ggt<br>cccagcactgccacAGGTc                          |
| 323 Msra          | V\$PPAR_RXR.01 | 1924 | 1946 | 1 | 0.775 | aggg<br>tgtaatgtgtaacAGGTcag                        |
| 324 Slc25a10      | V\$PPAR_RXR.01 | 3161 | 3183 | 1 | 0.776 | ga<br>tgtttgaagacatAGGTcaa                          |
| 325 Tomm70a       | V\$PPAR_RXR.01 | 1355 | 1377 | 1 | 0.776 | gt<br>aaaagccctgccagAGGTc                           |
| 326 Ndufs4        | V\$PPAR_RXR.01 | 229  | 251  | 1 | 0.776 | atga<br>acataggaagttatAGGTca                        |
| 327 Idh3b         | V\$PPAR_RXR.01 | 3837 | 3859 | 1 | 0.776 | acc                                                 |
| 328 Acox1         | V\$PPAR_RXR.01 | 1998 | 2020 | 1 | 0.776 | agtccacaggcctgAGGTca<br>gtc<br>gggtccgggtgtaaAGGTga |
| 329 Ctsa          | V\$PPAR_RXR.01 | 669  | 691  | 1 | 0.777 | ctg<br>ctgggattggccttAGGTcatc                       |
| 330 Aldh5a1       | V\$PPAR_RXR.01 | 2769 | 2791 | 1 | 0.777 | a<br>gggtccgggtgtaaAGGTga                           |
| 331 Ctsa          | V\$PPAR_RXR.01 | 641  | 663  | 1 | 0.777 | ctg<br>tcacaatgggtccAGGTcat                         |
| 332 Acad8         | V\$PPAR_RXR.01 | 678  | 700  | 1 | 0.777 | cc<br>tagttgttgaggaaAGGTgag                         |
| 333 Tomm70a       | V\$PPAR_RXR.01 | 2475 | 2497 | 1 | 0.778 | gg<br>tgctcaaggcagaAGGTaa                           |
| 334 Mosc2         | V\$PPAR_RXR.01 | 1441 | 1463 | 1 | 0.778 | gga<br>agtttgaggcaagAGGTgt                          |
| 335 Acad8         | V\$PPAR_RXR.01 | 1448 | 1470 | 1 | 0.779 | agg<br>gactttcaggtccAGGTcac                         |
| 336 Maob          | V\$PPAR_RXR.01 | 4815 | 4837 | 1 | 0.78  | cc<br>gagagccttggcagAGGTca                          |
| 337 Ctsd          | V\$PPAR_RXR.01 | 3967 | 3989 | 1 | 0.78  | agt<br>tcaggaatgaaaaAGGTc                           |
| 338 Es31          | V\$PPAR_RXR.01 | 631  | 653  | 1 | 0.78  | atct<br>tcaggaatgaaaaAGGTc                          |
| 339 Es31          | V\$PPAR_RXR.01 | 631  | 653  | 1 | 0.78  | atct<br>gagaattagctcagAGGTta                        |
| 340 Acot2         | V\$PPAR_RXR.01 | 4038 | 4060 | 1 | 0.781 | aaa<br>ttgacagaggtagtAGGTcat                        |
| 341 Decr2         | V\$PPAR_RXR.01 | 3170 | 3192 | 1 | 0.781 | gg                                                  |

Varanasi, U. et al. (1996). *J Biol Chem* **271**, 2147-2158

|               |                |      |      |   |       |                                                       |
|---------------|----------------|------|------|---|-------|-------------------------------------------------------|
| 342 Hspe1     | V\$PPAR_RXR.01 | 807  | 829  | 1 | 0.781 | cagagatagcttaaAGGTta<br>aga<br>ttgtgaaggaggtAGGTcac   |
| 343 Acot2     | V\$PPAR_RXR.01 | 276  | 298  | 1 | 0.782 | tg<br>aatgccagggttatAGGTgtg                           |
| 344 Vdac2     | V\$PPAR_RXR.01 | 990  | 1012 | 1 | 0.782 | tt<br>ctgttccggggagAGGTcct                            |
| 345 Slc25a10  | V\$PPAR_RXR.01 | 1026 | 1048 | 1 | 0.782 | gt                                                    |
| 346 Acox1     | V\$PPAR_RXR.01 | 4557 | 4579 | 1 | 0.782 | aagcgagagggaaacAGGT<br>ccagt<br>gaatttgaggccagAGGTttt |
| 347 Timm8a1   | V\$PPAR_RXR.01 | 2071 | 2093 | 1 | 0.782 | gc<br>acatacatggctagAGGTgc                            |
| 348 Idh3b     | V\$PPAR_RXR.01 | 4229 | 4251 | 1 | 0.783 | cct<br>cactgttaggctacAGGTgtc                          |
| 349 Slc25a20  | V\$PPAR_RXR.01 | 719  | 741  | 1 | 0.783 | ca<br>agtcctttgaaaaAGGTcat                            |
| 350 Slc25a10  | V\$PPAR_RXR.01 | 133  | 155  | 1 | 0.784 | aa<br>cccactgggaaatAGGTgtg                            |
| 351 Phyh      | V\$PPAR_RXR.01 | 3700 | 3722 | 1 | 0.784 | tt<br>gggtagcagacaaaAGGTa                             |
| 352 Ephx2     | V\$PPAR_RXR.01 | 1434 | 1456 | 1 | 0.784 | agag<br>tctgactgggagccAGGTca                          |
| 353 Actg1     | V\$PPAR_RXR.01 | 436  | 458  | 1 | 0.785 | ggg                                                   |
| 354 Suox      | V\$PPAR_RXR.01 | 514  | 536  | 1 | 0.785 | ctattctgggtatAGGTtgtc<br>gagaatctgtctaaAGGTga         |
| 355 Vapa      | V\$PPAR_RXR.01 | 382  | 404  | 1 | 0.788 | ata<br>gagcacagggtaggAGGTc                            |
| 356 Tmprss13  | V\$PPAR_RXR.01 | 4395 | 4417 | 1 | 0.788 | atga<br>aagatctggatcacAGGTga                          |
| 357 Cox5b     | V\$PPAR_RXR.01 | 584  | 606  | 1 | 0.789 | gcc<br>ccaactccgtacaaAGGTga                           |
| 358 Peci      | V\$PPAR_RXR.01 | 4754 | 4776 | 1 | 0.79  | ttg<br>ctgtcccaggacagAGGTtct                          |
| 359 Acox2     | V\$PPAR_RXR.01 | 5100 | 5122 | 1 | 0.79  | tg<br>agcccatagtccatAGGTcat                           |
| 360 Scp2      | V\$PPAR_RXR.01 | 1148 | 1170 | 1 | 0.79  | tt<br>ccaactccgtacaaAGGTga                            |
| 361 Peci      | V\$PPAR_RXR.01 | 4765 | 4787 | 1 | 0.79  | ttg<br>ttggtgaggtgaaAGGTattt                          |
| 362 Es31      | V\$PPAR_RXR.01 | 2529 | 2551 | 1 | 0.79  | c<br>atagtataagataaAGGTcat                            |
| 363 Aadat     | V\$PPAR_RXR.01 | 286  | 308  | 1 | 0.79  | ag<br>ttggtgaggtgaaAGGTattt                           |
| 364 Es31      | V\$PPAR_RXR.01 | 2529 | 2551 | 1 | 0.79  | c<br>ttgatttgcctcaaAGGTtaga                           |
| 365 Nipsnap3a | V\$PPAR_RXR.01 | 3123 | 3145 | 1 | 0.79  | c<br>tgcgtgctggggagAGGTcg                             |
| 366 Atp5d     | V\$PPAR_RXR.01 | 4194 | 4216 | 1 | 0.791 | tgc<br>tatgtgtagggcagAGGTtga                          |
| 367 Acaa1b    | V\$PPAR_RXR.01 | 3773 | 3795 | 1 | 0.791 | ta                                                    |

Varanasi, U. et al. (1996). *J Biol Chem* **271**, 2147-2159

|                   |                |      |      |   |       |                                                |
|-------------------|----------------|------|------|---|-------|------------------------------------------------|
| 368 Ctsh          | V\$PPAR_RXR.01 | 452  | 474  | 1 | 0.791 | tatttagaggacctAGGTcag<br>ac                    |
| 369 Atp5d         | V\$PPAR_RXR.01 | 5128 | 5150 | 1 | 0.791 | tgctgtctggggagAGGTcg<br>tgc                    |
| 370 Samm50        | V\$PPAR_RXR.01 | 3719 | 3741 | 1 | 0.792 | gcttaacgagaaaaAGGTc<br>agga                    |
| 371 Gpt2          | V\$PPAR_RXR.01 | 332  | 354  | 1 | 0.792 | tctctgaagctcacAGGTcac<br>tt                    |
| 372 Ndufa8        | V\$PPAR_RXR.01 | 751  | 773  | 1 | 0.792 | tccttacaggagaaAGGTtag<br>aca                   |
| 373 Cox6b1        | V\$PPAR_RXR.01 | 378  | 400  | 1 | 0.793 | aggagctgaggcagAGGTc<br>atgg                    |
| 374 Maob          | V\$PPAR_RXR.02 | 2722 | 2744 | 1 | 0.793 | agctccctgtcAAAGatcaa<br>gt                     |
| 375 Dhra4         | V\$PPAR_RXR.01 | 2560 | 2582 | 1 | 0.794 | agtgtctggggctaaAGGTgt<br>gcg                   |
| 376 Atp5f1        | V\$PPAR_RXR.01 | 4461 | 4483 | 1 | 0.794 | tggaagctgggtatAGGTgct<br>gc                    |
| 377 Atp5f1        | V\$PPAR_RXR.01 | 3626 | 3648 | 1 | 0.794 | tggaagctgggtatAGGTgct<br>gc                    |
| 378 Ak2           | V\$PPAR_RXR.02 | 4691 | 4713 | 1 | 0.795 | ttattaactgtcAAAGgccaaa<br>c                    |
| 379 Acaa1b        | V\$PPAR_RXR.01 | 1003 | 1025 | 1 | 0.797 | tcttactggggaacAGGTgcg<br>tg                    |
| 380 Pdia3         | V\$PPAR_RXR.02 | 3276 | 3298 | 1 | 0.799 | tgctatccgttcAAAGctcattg<br>caaccctgtgaaaAGGTca |
| 381 Ctsb          | V\$PPAR_RXR.01 | 134  | 156  | 1 | 0.801 | ttc<br>agagcacggggaacAGGT                      |
| 382 Ndufa9        | V\$PPAR_RXR.01 | 399  | 421  | 1 | 0.801 | aagct<br>gttataatggcaacAGGTctg                 |
| 383 Ctsa          | V\$PPAR_RXR.01 | 3293 | 3315 | 1 | 0.802 | at<br>tgaagaaaggcaaaaAGGTa                     |
| 384 Hspd1         | V\$PPAR_RXR.01 | 3415 | 3437 | 1 | 0.802 | tttg<br>tgattatgtataaAGGTcaca                  |
| 385 1300010F03Rik | V\$PPAR_RXR.01 | 2033 | 2055 | 1 | 0.802 | a<br>gttataatggcaacAGGTctg                     |
| 386 Ctsa          | V\$PPAR_RXR.01 | 3265 | 3287 | 1 | 0.802 | at<br>gctgactggggcagAGGTa                      |
| 387 Ephx2         | V\$PPAR_RXR.01 | 2976 | 2998 | 1 | 0.803 | gcag<br>tggggcattgtcAAAGgtgact                 |
| 388 Decr2         | V\$PPAR_RXR.02 | 3361 | 3383 | 1 | 0.806 | t<br>accagcagggccgAGGTc                        |
| 389 Atp5j         | V\$PPAR_RXR.01 | 4582 | 4604 | 1 | 0.807 | acct<br>tgggtgggggacaaAGGTat                   |
| 390 Atp5f1        | V\$PPAR_RXR.01 | 4979 | 5001 | 1 | 0.808 | cct<br>tgggtgggggacaaAGGTat                    |
| 391 Atp5f1        | V\$PPAR_RXR.01 | 4144 | 4166 | 1 | 0.808 | cct<br>tacgtgagggttcaAGGTcat                   |
| 392 Oat           | V\$PPAR_RXR.01 | 4609 | 4631 | 1 | 0.808 | gt<br>agatggaagcagaaAGGTc                      |
| 393 Ctsb          | V\$PPAR_RXR.01 | 3039 | 3061 | 1 | 0.809 | aaag<br>agcagccagagtaaAGGTg                    |
| 394 Tomm70a       | V\$PPAR_RXR.01 | 715  | 737  | 1 | 0.809 | aagg                                           |



|              |                |      |      |   |       |                                                     |
|--------------|----------------|------|------|---|-------|-----------------------------------------------------|
| 395 Lonp1    | V\$PPAR_RXR.01 | 3003 | 3025 | 1 | 0.809 | gacaaaaggggcagAGGT<br>ggaga<br>catatgagggctaaAGGTat |
| 396 Samm50   | V\$PPAR_RXR.01 | 3040 | 3062 | 1 | 0.81  | gtt<br>agcaaccaggtgacAGGTg                          |
| 397 Uqcrq    | V\$PPAR_RXR.01 | 2019 | 2041 | 1 | 0.811 | ggta<br>agcaaccaggtgacAGGTg                         |
| 398 Uqcrq    | V\$PPAR_RXR.01 | 2003 | 2025 | 1 | 0.811 | ggta<br>gttgacagcttcAAAGggcag                       |
| 399 Agmat    | V\$PPAR_RXR.02 | 5069 | 5091 | 1 | 0.811 | gg<br>gaaggagaggtaatAGGTa                           |
| 400 Phyh     | V\$PPAR_RXR.01 | 1280 | 1302 | 1 | 0.812 | acta<br>aataccaagaacaaAGGTt                         |
| 401 Ndufb5   | V\$PPAR_RXR.01 | 3865 | 3887 | 1 | 0.812 | acag<br>ggaaagatgttcAAAGgttag                       |
| 402 Aldh3a2  | V\$PPAR_RXR.02 | 386  | 408  | 1 | 0.812 | ga<br>gggcacatgggtaaAGGTg                           |
| 403 Ctsz     | V\$PPAR_RXR.01 | 1653 | 1675 | 1 | 0.813 | cta<br>acaaataggctcagAGGTca                         |
| 404 Opa1     | V\$PPAR_RXR.01 | 1032 | 1054 | 1 | 0.813 | acc<br>aggaactgggtacAGGTg                           |
| 405 Ak2      | V\$PPAR_RXR.01 | 3075 | 3097 | 1 | 0.815 | ggaa<br>ggtaggatgggaaaAGGTgt                        |
| 406 Atp5f1   | V\$PPAR_RXR.01 | 4897 | 4919 | 1 | 0.815 | ttt<br>ggtaggatgggaaaAGGTgt                         |
| 407 Atp5f1   | V\$PPAR_RXR.01 | 4062 | 4084 | 1 | 0.815 | ttt<br>aattactggtccaaAGGTtac                        |
| 408 Ak2      | V\$PPAR_RXR.01 | 4583 | 4605 | 1 | 0.816 | gt<br>atgtgactggcccaAGGTca                          |
| 409 Ndufa8   | V\$PPAR_RXR.01 | 268  | 290  | 1 | 0.816 | cac<br>agtataggggttaaAGGTgtg                        |
| 410 Lamp2    | V\$PPAR_RXR.01 | 493  | 515  | 1 | 0.817 | ca<br>ggatgaggggtgagAGGTg                           |
| 411 Phyh     | V\$PPAR_RXR.01 | 1886 | 1908 | 1 | 0.817 | acag<br>cgagttgagggcagAGGTcc                        |
| 412 Acaa1b   | V\$PPAR_RXR.01 | 18   | 40   | 1 | 0.818 | aca<br>gttcagtaggtcAAAGgaga                         |
| 413 Ehhadh   | V\$PPAR_RXR.02 | 2161 | 2183 | 1 | 0.818 | gaa<br>gggataggggacagAGGTc                          |
| 414 Slc25a10 | V\$PPAR_RXR.01 | 4616 | 4638 | 1 | 0.819 | cact<br>ggactcaaggtgaaAGGTg                         |
| 415 Hsd17b4  | V\$PPAR_RXR.01 | 3612 | 3634 | 1 | 0.819 | ggca<br>gaagagcaggttaaAGGTtc                        |
| 416 Idh3g    | V\$PPAR_RXR.01 | 2516 | 2538 | 1 | 0.819 | agg<br>cagaagcagttcAAAGgtctc                        |
| 417 Acaa1b   | V\$PPAR_RXR.02 | 4345 | 4367 | 1 | 0.819 | tg<br>ggaacaaagttcAAAGggca                          |
| 418 Ehhadh   | V\$PPAR_RXR.02 | 4069 | 4091 | 1 | 0.819 | gtt                                                 |
| 419 Cpt1a    | V\$PPAR_RXR.01 | 1079 | 1101 | 1 | 0.82  | ggggtagaggaaacAGGTg<br>aggc<br>tgcacggaggaaaaAGGTg  |
| 420 Ndufa9   | V\$PPAR_RXR.01 | 4595 | 4617 | 1 | 0.821 | taat                                                |

Louet, et al.  
(2001)  
*Biochem J*  
**354**,189-198

|     |               |                |      |      |   |       |                                                       |
|-----|---------------|----------------|------|------|---|-------|-------------------------------------------------------|
| 421 | Idh3b         | V\$PPAR_RXR.01 | 105  | 127  | 1 | 0.822 | cacagatagcaaaaAGGTc<br>acca<br>ctggagaaagttAAAGgtcat  |
| 422 | Slc25a20      | V\$PPAR_RXR.02 | 4132 | 4154 | 1 | 0.822 | ga<br>ccaggttagttcAAAGgtcga                           |
| 423 | Gcat          | V\$PPAR_RXR.02 | 734  | 756  | 1 | 0.823 | gg<br>gttaggaggacAAAGgaca                             |
| 424 | Gcdh          | V\$PPAR_RXR.02 | 3480 | 3502 | 1 | 0.824 | act<br>gttaggaggacAAAGgaca                            |
| 425 | Gcdh          | V\$PPAR_RXR.02 | 3480 | 3502 | 1 | 0.824 | act<br>ttcctggtgccagAGGTaa                            |
| 426 | Timm13        | V\$PPAR_RXR.01 | 1697 | 1719 | 1 | 0.825 | aa<br>ggcacggaagtcAAAGggc                             |
| 427 | Ndufab1       | V\$PPAR_RXR.02 | 2155 | 2177 | 1 | 0.825 | aact<br>ctgaatgtggttaaAGGTggc                         |
| 428 | Ctsa          | V\$PPAR_RXR.01 | 3964 | 3986 | 1 | 0.826 | gg<br>ggggggagggtgacAGGTg                             |
| 429 | Timm13        | V\$PPAR_RXR.01 | 3734 | 3756 | 1 | 0.826 | aaac<br>ctgaatgtggttaaAGGTggc                         |
| 430 | Ctsa          | V\$PPAR_RXR.01 | 3936 | 3958 | 1 | 0.826 | gg<br>tcccacggggccaaAGGTa                             |
| 431 | 2010309E21Rik | V\$PPAR_RXR.01 | 178  | 200  | 1 | 0.826 | gcag<br>gcatcactggtcaaAGGTgta                         |
| 432 | Ndufa4        | V\$PPAR_RXR.01 | 1877 | 1899 | 1 | 0.827 | at<br>tacaatggggccaaAGGTac                            |
| 433 | Hspe1         | V\$PPAR_RXR.01 | 3420 | 3442 | 1 | 0.827 | cag<br>ttgctccagataaaAGGTcaa                          |
| 434 | Samm50        | V\$PPAR_RXR.01 | 646  | 668  | 1 | 0.828 | gc<br>aatatctaggcaaaaAGGTa                            |
| 435 | Abcd3         | V\$PPAR_RXR.01 | 796  | 818  | 1 | 0.83  | tga<br>tctttgggtgtcAAAGgacaac                         |
| 436 | Atp5d         | V\$PPAR_RXR.02 | 2613 | 2635 | 1 | 0.831 | t<br>tctttgggtgtcAAAGgacaac                           |
| 437 | Atp5d         | V\$PPAR_RXR.02 | 3547 | 3569 | 1 | 0.831 | t<br>gagtgtctgggataaAGGTgt                            |
| 438 | Actg1         | V\$PPAR_RXR.01 | 1078 | 1100 | 1 | 0.832 | gtg<br>gaactgtatgtAAAGgtcag                           |
| 439 | Ndufa9        | V\$PPAR_RXR.02 | 672  | 694  | 1 | 0.833 | tg<br>agcagcaagggataAGGTc                             |
| 440 | Cyp2a22       | V\$PPAR_RXR.01 | 1632 | 1654 | 1 | 0.835 | aagt<br>cctgtagagggtcAAAGaaca                         |
| 441 | Dmgdh         | V\$PPAR_RXR.02 | 3738 | 3760 | 1 | 0.835 | atc                                                   |
| 442 | Cat           | V\$PPAR_RXR.02 | 4260 | 4282 | 1 | 0.835 | ggatcagaagtcAAAGatcat<br>tt<br>atgttctggggttaaAGGTggt |
| 443 | Hsd17b10      | V\$PPAR_RXR.01 | 2317 | 2339 | 1 | 0.836 | gc<br>acataggaggtAAAGgtca                             |
| 444 | Cox5b         | V\$PPAR_RXR.02 | 4414 | 4436 | 1 | 0.838 | gcc<br>tggcctgggtcacAGGTga                            |
| 445 | Atp5j         | V\$PPAR_RXR.01 | 4568 | 4590 | 1 | 0.839 | cct<br>gtttaacagagtaaAGGTca                           |
| 446 | Cyca          | V\$PPAR_RXR.01 | 4496 | 4518 | 1 | 0.84  | cca                                                   |

Girnun, G. D.,  
et al. (2002).  
*Molecular  
Endocrinology*  
**16**, 2793-2803

|     |               |                |      |      |   |       |                                                     |                                                                                           |
|-----|---------------|----------------|------|------|---|-------|-----------------------------------------------------|-------------------------------------------------------------------------------------------|
| 447 | 1110020G09Rik | V\$PPAR_RXR.01 | 3715 | 3737 | 1 | 0.84  | gggagttaggaacAGGTa<br>aaca                          |                                                                                           |
| 448 | Actg1         | V\$PPAR_RXR.02 | 1810 | 1832 | 1 | 0.84  | tctgtgagttcAAAGctcacct<br>ggctcagtgataaAGGTaa       |                                                                                           |
| 449 | Scp2          | V\$PPAR_RXR.01 | 312  | 334  | 1 | 0.843 | atg<br>aaggagaggcaaaAGGT                            |                                                                                           |
| 450 | Hibadh        | V\$PPAR_RXR.01 | 2004 | 2026 | 1 | 0.844 | aaaag<br>aagaaggagctcAAAGgtta                       |                                                                                           |
| 451 | Hacl1         | V\$PPAR_RXR.02 | 958  | 980  | 1 | 0.845 | tga<br>gaaggcgggctcAAAGgtcg                         |                                                                                           |
| 452 | Lonp1         | V\$PPAR_RXR.02 | 4603 | 4625 | 1 | 0.845 | ggg<br>ctctctctggccacAGGTgag                        |                                                                                           |
| 453 | Samm50        | V\$PPAR_RXR.01 | 2630 | 2652 | 1 | 0.846 | gc<br>ttgaactaggtctcAGGTcac                         |                                                                                           |
| 454 | Acox2         | V\$PPAR_RXR.01 | 4481 | 4503 | 1 | 0.846 | aa                                                  |                                                                                           |
| 455 | Cpt1a         | V\$PPAR_RXR.02 | 1957 | 1979 | 1 | 0.846 | gtacaggggctcAAAGttcaa<br>gt<br>aagactcagaacaaAGGTc  | Louet, et al.<br>(2001)<br><i>Biochem J</i><br><b>354</b> ,189-199                        |
| 456 | Atp5f1        | V\$PPAR_RXR.01 | 37   | 59   | 1 | 0.851 | aca                                                 |                                                                                           |
| 457 | Acox1         | V\$PPAR_RXR.01 | 1084 | 1106 | 1 | 0.853 | agaaactgggtgaaAGGTg<br>gatt                         | Varanasi, U. et<br>al. (1996). <i>J</i><br><i>Biol Chem</i><br><b>271</b> , 2147-<br>2160 |
| 458 | Suox          | V\$PPAR_RXR.01 | 29   | 51   | 1 | 0.855 | gg<br>aactatgggggaaAGGTct                           |                                                                                           |
| 459 | Scp2          | V\$PPAR_RXR.01 | 47   | 69   | 1 | 0.857 | cct<br>ctaccgaggagaaAGGTa                           |                                                                                           |
| 460 | Vdac3         | V\$PPAR_RXR.01 | 1019 | 1041 | 1 | 0.858 | acca<br>accctgaggagagAGGTc                          |                                                                                           |
| 461 | Ndufa4        | V\$PPAR_RXR.01 | 2198 | 2220 | 1 | 0.858 | atct<br>ctaccgaggagaaAGGTa                          |                                                                                           |
| 462 | Vdac3         | V\$PPAR_RXR.01 | 1001 | 1023 | 1 | 0.858 | acca<br>ggccttggggtcAAAGgtggc                       |                                                                                           |
| 463 | Hint2         | V\$PPAR_RXR.02 | 1066 | 1088 | 1 | 0.858 | cc<br>tattaaacggagaaAGGTaa                          |                                                                                           |
| 464 | Hspd1         | V\$PPAR_RXR.01 | 2568 | 2590 | 1 | 0.86  | tgc<br>gaatgactggatacAGGTca                         |                                                                                           |
| 465 | Ctsd          | V\$PPAR_RXR.01 | 4757 | 4779 | 1 | 0.861 | cgt<br>caataggaggaaaaAGGTc                          |                                                                                           |
| 466 | Cyp2e1        | V\$PPAR_RXR.01 | 3520 | 3542 | 1 | 0.861 | ccga                                                |                                                                                           |
| 467 | Cpt2          | V\$PPAR_RXR.01 | 377  | 399  | 1 | 0.863 | agttttgtggggaaAGGTgaa<br>at                         | Barrero M. J.<br>et al. (2003)<br><i>Biochem. J.</i><br><b>369</b> , 721–730              |
| 468 | Chchd3        | V\$PPAR_RXR.01 | 1499 | 1521 | 1 | 0.864 | agaagctaggagacAGGTg<br>agca                         |                                                                                           |
| 469 | Chchd3        | V\$PPAR_RXR.01 | 1493 | 1515 | 1 | 0.864 | agaagctaggagacAGGTg<br>agca<br>ccaagcctgggtaaAGGTcg |                                                                                           |
| 470 | Cyca          | V\$PPAR_RXR.01 | 4570 | 4592 | 1 | 0.866 | cca                                                 |                                                                                           |

|              |                |      |      |   |       |                                                      |
|--------------|----------------|------|------|---|-------|------------------------------------------------------|
| 471 Vdac2    | V\$PPAR_RXR.01 | 4129 | 4151 | 1 | 0.87  | cagagtgaggcaaaaAGGTt<br>aata<br>tcagaaatggtaaaAGGTga |
| 472 Mut      | V\$PPAR_RXR.01 | 2998 | 3020 | 1 | 0.874 | gca<br>tgaatgtaggtgaaAGGTcg                          |
| 473 Slc25a20 | V\$PPAR_RXR.01 | 4980 | 5002 | 1 | 0.877 | gcg<br>caaggttggtcAAAGctcact                         |
| 474 Kmo      | V\$PPAR_RXR.02 | 4902 | 4924 | 1 | 0.877 | t<br>aagtcgcggggaaaAGGTg                             |
| 475 Vdac2    | V\$PPAR_RXR.01 | 5103 | 5125 | 1 | 0.878 | atct<br>agaggctcggctacAGGTca                         |
| 476 Samm50   | V\$PPAR_RXR.01 | 5033 | 5055 | 1 | 0.878 | cgg<br>ggagagagggggagAGGT                            |
| 477 Ndufs2   | V\$PPAR_RXR.01 | 379  | 401  | 1 | 0.879 | cattc<br>catgcagaggtcagAGGTca                        |
| 478 Atp5j    | V\$PPAR_RXR.01 | 678  | 700  | 1 | 0.886 | gcc<br>catgcagaggtcagAGGTca                          |
| 479 Atp5j    | V\$PPAR_RXR.01 | 607  | 629  | 1 | 0.886 | gcc<br>ggccctgaggtcagAGGTca                          |
| 480 Acp5     | V\$PPAR_RXR.01 | 8    | 30   | 1 | 0.888 | gca<br>ggccctgaggtcagAGGTca                          |
| 481 Acp5     | V\$PPAR_RXR.01 | 1169 | 1191 | 1 | 0.888 | gca<br>gcactgtggacagAGGTca                           |
| 482 Ndufb5   | V\$PPAR_RXR.01 | 3615 | 3637 | 1 | 0.89  | aaa<br>tgtgtggaggccagAGGTca                          |
| 483 Atp5f1   | V\$PPAR_RXR.01 | 2139 | 2161 | 1 | 0.893 | gct<br>tgtgtggaggccagAGGTca                          |
| 484 Atp5f1   | V\$PPAR_RXR.01 | 1304 | 1326 | 1 | 0.893 | gct<br>aagtgaggccagAGGTc                             |
| 485 Acaa1b   | V\$PPAR_RXR.01 | 3971 | 3993 | 1 | 0.898 | agat<br>gatataggggtcagAGGTca                         |
| 486 Aldh5a1  | V\$PPAR_RXR.01 | 1472 | 1494 | 1 | 0.898 | aca<br>aggtcatgggtcAAAGggcat                         |
| 487 Slc25a13 | V\$PPAR_RXR.02 | 2167 | 2189 | 1 | 0.898 | cc<br>gggtgactggtgaaAGGTca                           |
| 488 Coq9     | V\$PPAR_RXR.01 | 575  | 597  | 1 | 0.902 | tgg<br>cacatggaggtcAAAGggca                          |
| 489 Msra     | V\$PPAR_RXR.02 | 2613 | 2635 | 1 | 0.907 | act                                                  |
| 490 Acox1    | V\$PPAR_RXR.01 | 4700 | 4722 | 1 | 0.909 | gggtaacaggacaaaAGGTt<br>acgt                         |
| 491 Hspd1    | V\$PPAR_RXR.01 | 4737 | 4759 | 1 | 0.912 | gtcccgtgggtgaaAGGTca<br>agt<br>acaatggggggcatAGGTc   |
| 492 Uox      | V\$PPAR_RXR.01 | 2831 | 2853 | 1 | 0.912 | atga<br>gtcccgtgggtgaaAGGTca                         |
| 493 Hspe1    | V\$PPAR_RXR.01 | 4748 | 4770 | 1 | 0.912 | agt<br>cagaaaagggccagAGGTc                           |
| 494 Tomm70a  | V\$PPAR_RXR.01 | 4930 | 4952 | 1 | 0.914 | accg<br>ggtaggaggtcAAAGgtaa                          |
| 495 Mccc2    | V\$PPAR_RXR.02 | 3452 | 3474 | 1 | 0.916 | aca<br>tcaaacaaggtgaaAGGTg                           |
| 496 Timm8a1  | V\$PPAR_RXR.01 | 164  | 186  | 1 | 0.923 | aaga                                                 |

Varanasi, U. et al. (1996). *J Biol Chem* **271**, 2147-2161

|     |        |                |      |      |   |       |                             |                                                                       |
|-----|--------|----------------|------|------|---|-------|-----------------------------|-----------------------------------------------------------------------|
| 497 | Atp5j  | V\$PPAR_RXR.01 | 4510 | 4532 | 1 | 0.924 | tactcccagggcaaAGGTga<br>cgg | Varanasi, U. et al. (1996). <i>J Biol Chem</i> <b>271</b> , 2147-2162 |
| 498 | Acox1  | V\$PPAR_RXR.02 | 658  | 680  | 1 | 0.924 | aaatctggggtcAAAGgtcca<br>ca |                                                                       |
| 499 | Phyh   | V\$PPAR_RXR.02 | 2324 | 2346 | 1 | 0.929 | agtgtggggtcAAAGgtga<br>aga  | Varanasi, U. et al. (1996). <i>J Biol Chem</i> <b>271</b> , 2147-2163 |
| 500 | Hacl1  | V\$PPAR_RXR.01 | 614  | 636  | 1 | 0.944 | acaaaacaggggaaAGGT<br>cagag |                                                                       |
| 501 | Acox1  | V\$PPAR_RXR.01 | 5049 | 5071 | 1 | 0.946 | gaaagcaaggtaaaAGGTc<br>aagg |                                                                       |
| 502 | Ndufb5 | V\$PPAR_RXR.01 | 3455 | 3477 | 1 | 0.952 | ctctgcgaggccaaAGGTca<br>aga |                                                                       |
| 503 | Kmo    | V\$PPAR_RXR.01 | 2173 | 2195 | 1 | 0.985 | ttaaagtaggacaaAGGTca<br>cat |                                                                       |

**B) PPRE 28 days**

| No. | SEQUENCE NAME <sup>1</sup> | MATRIX <sup>2</sup> | START POS. | END POS. | CORE SIM. | MATRIX SIM. | SEQUENCE                     | REFERENCE                                                                       |
|-----|----------------------------|---------------------|------------|----------|-----------|-------------|------------------------------|---------------------------------------------------------------------------------|
| 1   | Abcd3                      | V\$PPAR_RXR.01      | 385        | 407      | 0.754     | 0.804       | actgagtgggaaacAGGG<br>caaag  |                                                                                 |
| 2   | Ndufb8                     | V\$PPAR_RXR.01      | 1896       | 1918     | 0.754     | 0.805       | aataaaaaggggaaAGGG<br>aacca  |                                                                                 |
| 4   | Ndufs8                     | V\$PPAR_RXR.01      | 1598       | 1620     | 0.754     | 0.807       | gaggaaatggccacAGGG<br>cagag  |                                                                                 |
| 3   | Sdhb                       | V\$PPAR_RXR.01      | 4737       | 4759     | 0.754     | 0.807       | gaggggcggggcagAGG<br>Ccagga  |                                                                                 |
| 5   | D10Jhu81e                  | V\$PPAR_RXR.01      | 3500       | 3522     | 0.754     | 0.808       | tgtggcctggacagAGGCc<br>agtg  |                                                                                 |
| 6   | P4hb                       | V\$PPAR_RXR.01      | 193        | 215      | 0.754     | 0.811       | gaacctaggagaaAGGG<br>cagga   |                                                                                 |
| 7   | D10Jhu81e                  | V\$PPAR_RXR.01      | 1851       | 1873     | 0.754     | 0.812       | gatgtatgggtcacAGGCc<br>acca  |                                                                                 |
| 8   | Ndufa8                     | V\$PPAR_RXR.01      | 3648       | 3670     | 0.754     | 0.812       | agctcaaggttaaAGGGta<br>aaa   |                                                                                 |
| 9   | Ephx2                      | V\$PPAR_RXR.01      | 155        | 177      | 0.754     | 0.813       | aggggagaggagaaAGG<br>Gcaagg  |                                                                                 |
| 10  | Ppt1                       | V\$PPAR_RXR.01      | 128        | 150      | 0.754     | 0.814       | gagaaagaggaaaaAGG<br>Ggaata  |                                                                                 |
| 11  | Pcx                        | V\$PPAR_RXR.01      | 3295       | 3317     | 0.754     | 0.816       | gtgacctgggcaaAGGCct<br>cta   | Jitrapakdee, S. et al.<br>(2005) <i>J Biol Chem</i><br><b>280</b> , 27466-27476 |
| 12  | Uox                        | V\$PPAR_RXR.01      | 2120       | 2142     | 0.754     | 0.818       | atcttacaggacacAGGCc<br>aact  |                                                                                 |
| 13  | Fh1                        | V\$PPAR_RXR.01      | 49         | 71       | 0.754     | 0.823       | accaccaggggcaaAGGC<br>aagag  |                                                                                 |
| 14  | Kmo                        | V\$PPAR_RXR.01      | 3326       | 3348     | 0.754     | 0.823       | accaccaggggcaaAGGC<br>aagag  |                                                                                 |
| 15  | Chdh                       | V\$PPAR_RXR.01      | 401        | 423      | 0.754     | 0.825       | gggaaatgggctatAGGCc<br>atgt  |                                                                                 |
| 16  | Ndufs2                     | V\$PPAR_RXR.01      | 4039       | 4061     | 0.754     | 0.825       | ggtccctgggacatAGGCc<br>acca  |                                                                                 |
| 17  | Timm13                     | V\$PPAR_RXR.01      | 3302       | 3324     | 0.754     | 0.825       | ggctcttaggacacAGGGc<br>agac  |                                                                                 |
| 18  | 1100001H23Rik              | V\$PPAR_RXR.01      | 448        | 470      | 0.754     | 0.83        | aaggaaatggctaaAGGG<br>catgc  |                                                                                 |
| 19  | Echs1                      | V\$PPAR_RXR.01      | 4743       | 4765     | 0.754     | 0.833       | ccatcacaggggaaAGGG<br>cacag  |                                                                                 |
| 20  | Actg1                      | V\$PPAR_RXR.01      | 3960       | 3982     | 0.754     | 0.835       | gactccaagggtcacAGGGc<br>acag |                                                                                 |
| 21  | Por                        | V\$PPAR_RXR.01      | 3269       | 3291     | 0.754     | 0.842       | taaacatggggaaaAGGC<br>cagat  |                                                                                 |
| 22  | Atp5j2                     | V\$PPAR_RXR.01      | 1970       | 1992     | 0.754     | 0.844       | atgataaggggttaaAGGGc<br>aggg |                                                                                 |
| 23  | Lamp2                      | V\$PPAR_RXR.01      | 4077       | 4099     | 0.754     | 0.852       | agctttaggaaaaAGGGc<br>attt   |                                                                                 |
| 24  | D10Jhu81e                  | V\$PPAR_RXR.01      | 2402       | 2424     | 0.754     | 0.858       | cattcacaggacaaAGGGc<br>acgt  |                                                                                 |
| 25  | Ehhadh                     | V\$PPAR_RXR.01      | 2306       | 2328     | 0.754     | 0.863       | ttttaaaggttaaAGGGca<br>gga   |                                                                                 |

|    |         |                |      |      |       |       |                              |
|----|---------|----------------|------|------|-------|-------|------------------------------|
| 26 | Mdh2    | V\$PPAR_RXR.01 | 1466 | 1488 | 0.754 | 0.863 | tgtatctaggtcaaAGGGga<br>agt  |
| 27 | Slc25a1 | V\$PPAR_RXR.01 | 3326 | 3348 | 0.754 | 0.865 | gtagagaggggacaaAGGC<br>catcc |
| 28 | Slc25a1 | V\$PPAR_RXR.01 | 4440 | 4462 | 0.754 | 0.865 | ggtaggggggacaaAGGC<br>caact  |
| 29 | Chdh    | V\$PPAR_RXR.01 | 1164 | 1186 | 0.769 | 0.801 | aagagccaggagaaGGG<br>Tcccag  |
| 30 | Dhrs4   | V\$PPAR_RXR.01 | 491  | 513  | 0.769 | 0.803 | aatatatggggcatGGGTa<br>agt   |
| 31 | Hspa5   | V\$PPAR_RXR.01 | 4800 | 4822 | 0.769 | 0.803 | gactcattggctacTGGTca<br>ttc  |
| 32 | Hspa5   | V\$PPAR_RXR.01 | 4797 | 4819 | 0.769 | 0.803 | gactcattggctacTGGTca<br>ttc  |
| 33 | Es31    | V\$PPAR_RXR.01 | 928  | 950  | 0.769 | 0.805 | ctggtcttgccatTGGTga<br>cac   |
| 34 | Es31    | V\$PPAR_RXR.01 | 928  | 950  | 0.769 | 0.805 | ctggtcttgccatTGGTga<br>cac   |
| 35 | Cpox    | V\$PPAR_RXR.01 | 4389 | 4411 | 0.769 | 0.806 | ataatcgaggccacTGGTt<br>attc  |
| 36 | Ndufa6  | V\$PPAR_RXR.01 | 703  | 725  | 0.769 | 0.806 | accaggagggtaaaGGGT<br>aaaca  |
| 37 | Sod2    | V\$PPAR_RXR.01 | 2821 | 2843 | 0.769 | 0.806 | ccatggaaggccatTGGTg<br>aagg  |
| 38 | Mut     | V\$PPAR_RXR.01 | 3789 | 3811 | 0.769 | 0.81  | agaaatagggaaaaGGGT<br>cttcc  |
| 39 | Cisd1   | V\$PPAR_RXR.01 | 610  | 632  | 0.769 | 0.811 | ggaatgtaggtcagTGGTa<br>atgc  |
| 40 | Fahd2a  | V\$PPAR_RXR.01 | 4369 | 4391 | 0.769 | 0.812 | acagatttggaacTGGTc<br>agac   |
| 41 | Bdh1    | V\$PPAR_RXR.01 | 4674 | 4696 | 0.769 | 0.813 | tcagaaagggggatTGGTc<br>acct  |
| 42 | Acaa1a  | V\$PPAR_RXR.01 | 3009 | 3031 | 0.769 | 0.815 | agggattgggagagGGGT<br>caaaa  |
| 43 | Chdh    | V\$PPAR_RXR.01 | 4686 | 4708 | 0.769 | 0.819 | gctaggaaggagagTGGT<br>cagca  |
| 44 | Mosc2   | V\$PPAR_RXR.01 | 993  | 1015 | 0.769 | 0.825 | cacatattgggtaaTGGTga<br>gct  |
| 45 | Ndufa8  | V\$PPAR_RXR.01 | 1128 | 1150 | 0.769 | 0.828 | tgaacatgggaaaTGGT<br>aagca   |
| 46 | Ppt1    | V\$PPAR_RXR.01 | 32   | 54   | 0.769 | 0.828 | tgtgtggaggccagTGGTc<br>aacc  |
| 46 | Ppt1    | V\$PPAR_RXR.01 | 776  | 798  | 0.769 | 0.828 | gagaaggagggaaaGGG<br>Taattc  |
| 47 | Actg1   | V\$PPAR_RXR.01 | 2091 | 2113 | 0.769 | 0.836 | accatgaaggtaaGGGT<br>ctgca   |
| 48 | Sdhb    | V\$PPAR_RXR.01 | 1139 | 1161 | 0.769 | 0.837 | gtaagcagggacaaTGGT<br>aaata  |
| 49 | Acaa1b  | V\$PPAR_RXR.01 | 890  | 912  | 0.769 | 0.838 | tgctattgtcaaGGGTga<br>ccc    |
| 50 | Hibch   | V\$PPAR_RXR.01 | 2789 | 2811 | 0.769 | 0.846 | agcagctaggacaaGGGT<br>cttaa  |
| 51 | Scpep1  | V\$PPAR_RXR.01 | 891  | 913  | 0.769 | 0.882 | gaaatgcaggtaaTGGTc<br>aatc   |

|                  |                |      |      |       |       |                              |
|------------------|----------------|------|------|-------|-------|------------------------------|
| 52 Acot2         | V\$PPAR_RXR.01 | 4514 | 4536 | 0.769 | 0.884 | ggaatgtaggtaaaGGGTc<br>acac  |
| 53 Pcx           | V\$PPAR_RXR.01 | 4627 | 4649 | 0.769 | 0.894 | atgatggagggcaaGGGT<br>cacat  |
| 54 Adhfe1        | V\$PPAR_RXR.01 | 4578 | 4600 | 0.785 | 0.801 | gtgactttgggtaaAGCTc<br>ac    |
| 55 Sdha          | V\$PPAR_RXR.01 | 1990 | 2012 | 0.785 | 0.801 | aagcaatgggagaaAGCT<br>aaagc  |
| 56 Baat          | V\$PPAR_RXR.01 | 403  | 425  | 0.785 | 0.802 | agcactgggagacAGCT<br>caatc   |
| 57 2010309E21Rik | V\$PPAR_RXR.01 | 4641 | 4663 | 0.785 | 0.803 | cttttggtggccaaAGATctc<br>tt  |
| 58 Asah1         | V\$PPAR_RXR.01 | 2733 | 2755 | 0.785 | 0.805 | ataagttaggtcagAGATaa<br>agg  |
| 59 Bdh1          | V\$PPAR_RXR.01 | 2317 | 2339 | 0.785 | 0.806 | cctgtggaggggacAGCTc<br>actc  |
| 60 Hsd17b4       | V\$PPAR_RXR.01 | 281  | 303  | 0.785 | 0.809 | gacagggtgggaaAGCT<br>gaacc   |
| 61 Ndufa6        | V\$PPAR_RXR.01 | 4679 | 4701 | 0.785 | 0.809 | aagacctcgggcatAGATa<br>acgg  |
| 62 Cps1          | V\$PPAR_RXR.01 | 3484 | 3506 | 0.785 | 0.81  | tatatcacggacacAGATg<br>atgg  |
| 63 Dhra4         | V\$PPAR_RXR.01 | 3146 | 3168 | 0.785 | 0.811 | ggaccctgggagagAGAT<br>caggt  |
| 64 Hspd1         | V\$PPAR_RXR.01 | 1266 | 1288 | 0.785 | 0.813 | ggaaactgggcaagAGCT<br>gaagc  |
| 65 Glud1         | V\$PPAR_RXR.01 | 1293 | 1315 | 0.785 | 0.814 | gacactgtgggtatAGCTca<br>gtg  |
| 66 Hsd17b4       | V\$PPAR_RXR.01 | 439  | 461  | 0.785 | 0.814 | aggaaaatgggaaAGATt<br>aaat   |
| 67 Baat          | V\$PPAR_RXR.01 | 5010 | 5032 | 0.785 | 0.815 | gactattcgggtcagAGCTga<br>gga |
| 68 Mdh2          | V\$PPAR_RXR.01 | 4697 | 4719 | 0.785 | 0.815 | ccggaagtgggcaaAGCT<br>aacgg  |
| 69 Sod2          | V\$PPAR_RXR.01 | 1402 | 1424 | 0.785 | 0.816 | tccaaagaggacacAGCT<br>gagat  |
| 70 Pitrm1        | V\$PPAR_RXR.01 | 2568 | 2590 | 0.785 | 0.819 | ctttcgtggtagAGATcag<br>ca    |
| 71 Acad8         | V\$PPAR_RXR.01 | 1245 | 1267 | 0.785 | 0.82  | tatgaatgggaagAGCTc<br>atgg   |
| 72 Ctsh          | V\$PPAR_RXR.01 | 2028 | 2050 | 0.785 | 0.824 | gccatcctggaagAGCTc<br>aaaa   |
| 73 Bckdha        | V\$PPAR_RXR.01 | 180  | 202  | 0.785 | 0.835 | attcactagggaaaAGCTa<br>atgg  |
| 74 D10Jhu81e     | V\$PPAR_RXR.01 | 210  | 232  | 0.785 | 0.839 | gtgctgcagggcacAGCTc<br>agga  |
| 75 Pdia3         | V\$PPAR_RXR.01 | 4123 | 4145 | 0.785 | 0.842 | aaaaaaaaaggtgaaAGCT<br>gagcc |
| 76 Fabp1         | V\$PPAR_RXR.01 | 4792 | 4814 | 0.785 | 0.843 | ccaaccaagggcaaAGCT<br>ctctg  |
| 77 Hspe1         | V\$PPAR_RXR.01 | 1128 | 1150 | 0.785 | 0.85  | aataaaaaggacaaAGAT<br>aaaga  |
| 78 Uox           | V\$PPAR_RXR.01 | 3184 | 3206 | 0.785 | 0.857 | gacgttcaggctaaAGATc<br>agtt  |



|     |          |                |      |      |       |       |                             |
|-----|----------|----------------|------|------|-------|-------|-----------------------------|
| 79  | Pccb     | V\$PPAR_RXR.01 | 4707 | 4729 | 0.785 | 0.867 | taaaagttggtcagAGCTca<br>tta |
| 80  | Abcd3    | V\$PPAR_RXR.01 | 4400 | 4422 | 0.785 | 0.877 | atgtagtgggaaaaAGCTc<br>agag |
| 81  | Gpt2     | V\$PPAR_RXR.01 | 1797 | 1819 | 0.862 | 0.76  | ttatgtgaggtcgaAGTTga<br>gtg |
| 82  | Ndufs8   | V\$PPAR_RXR.01 | 21   | 43   | 0.862 | 0.762 | ttccagaagtccagAGTTca<br>att |
| 83  | Aadac    | V\$PPAR_RXR.01 | 1874 | 1896 | 0.862 | 0.764 | atgaactgggaagAGTTg<br>gcag  |
| 84  | Ndufb9   | V\$PPAR_RXR.01 | 1125 | 1147 | 0.862 | 0.764 | gtgaataaggaagtAGTTc<br>atct |
| 85  | Cox6b1   | V\$PPAR_RXR.01 | 3903 | 3925 | 0.862 | 0.765 | tgtttctggattatAGTTcattc     |
| 86  | Ech1     | V\$PPAR_RXR.01 | 4729 | 4751 | 0.862 | 0.765 | aaaattgtgtataaAGTTcat<br>ca |
| 87  | Fahd2a   | V\$PPAR_RXR.01 | 1395 | 1417 | 0.862 | 0.766 | gcaagatcggcaagAGTT<br>cttca |
| 88  | Pccb     | V\$PPAR_RXR.01 | 3131 | 3153 | 0.862 | 0.767 | atgttgagggaaacAGTTct<br>aag |
| 89  | Ndufa7   | V\$PPAR_RXR.01 | 382  | 404  | 0.862 | 0.771 | tggatacaggtcagAGTTgt<br>gga |
| 90  | Aldh3a2  | V\$PPAR_RXR.01 | 669  | 691  | 0.862 | 0.772 | acaagcgagctcacAGTTc<br>aatt |
| 91  | Slc25a1  | V\$PPAR_RXR.01 | 441  | 463  | 0.862 | 0.772 | accaacagggtcacAGTTt<br>caat |
| 92  | Acp5     | V\$PPAR_RXR.01 | 930  | 952  | 0.862 | 0.773 | ggctctgaggctgaAGTTc<br>atgg |
| 93  | Acp5     | V\$PPAR_RXR.01 | 2091 | 2113 | 0.862 | 0.773 | ggctctgaggctgaAGTTc<br>atgg |
| 94  | Adhfe1   | V\$PPAR_RXR.01 | 4044 | 4066 | 0.862 | 0.773 | atagttaggccaaAGTTt<br>cct   |
| 95  | Chdh     | V\$PPAR_RXR.01 | 50   | 72   | 0.862 | 0.773 | agagtcagggtataAGTTc<br>aact |
| 96  | Hsd17b4  | V\$PPAR_RXR.01 | 385  | 407  | 0.862 | 0.773 | acacacctggggagAGTTc<br>gaat |
| 97  | Aifm1    | V\$PPAR_RXR.01 | 847  | 869  | 0.862 | 0.775 | gaacagatggccaaAGTT<br>agtat |
| 98  | Pccb     | V\$PPAR_RXR.01 | 4697 | 4719 | 0.862 | 0.775 | cagcatttgtaaaAGTTgg<br>tca  |
| 99  | Mdh2     | V\$PPAR_RXR.01 | 1147 | 1169 | 0.862 | 0.776 | ctggggagggaagAGTTt<br>atcc  |
| 100 | Acaa1b   | V\$PPAR_RXR.01 | 1179 | 1201 | 0.862 | 0.778 | cttattaagagcaaAGTTga<br>ctg |
| 101 | Slc25a10 | V\$PPAR_RXR.01 | 4679 | 4701 | 0.862 | 0.781 | agcaccagggcataAGTTc<br>agac |
| 102 | Hibch    | V\$PPAR_RXR.01 | 2742 | 2764 | 0.862 | 0.784 | caggagaagctgaaAGTT<br>caata |
| 103 | Ehhadh   | V\$PPAR_RXR.01 | 4076 | 4098 | 0.862 | 0.785 | catttagggaacaaAGTTc<br>aaag |
| 104 | Cox4i1   | V\$PPAR_RXR.01 | 2403 | 2425 | 0.862 | 0.789 | gtgatgaagggacaAGTTc<br>aaca |
| 105 | Hsd17b10 | V\$PPAR_RXR.01 | 3574 | 3596 | 0.862 | 0.79  | aacacaagggtcaaAGTT<br>gctgg |

|               |                |      |      |       |       |                             |
|---------------|----------------|------|------|-------|-------|-----------------------------|
| 106 Aldh3a2   | V\$PPAR_RXR.01 | 3001 | 3023 | 0.862 | 0.792 | ttaaattagctcagAGTTca<br>cct |
| 107 D10Jhu81e | V\$PPAR_RXR.01 | 4465 | 4487 | 0.862 | 0.792 | tcctcacaggccacAGTTct<br>gcc |
| 108 Echs1     | V\$PPAR_RXR.01 | 1460 | 1482 | 0.862 | 0.792 | gcccttggtggcgaAGTTa<br>aac  |
| 109 Ech1      | V\$PPAR_RXR.01 | 2072 | 2094 | 0.862 | 0.798 | tgaaggtgggatAGTTa<br>acc    |
| 110 Baat      | V\$PPAR_RXR.01 | 4474 | 4496 | 0.862 | 0.8   | gctggaaggcaaaAGTT<br>aagac  |
| 111 Pitrm1    | V\$PPAR_RXR.01 | 292  | 314  | 0.862 | 0.8   | aaaaactggaaaaAGTTg<br>ccct  |
| 112 Slc25a15  | V\$PPAR_RXR.01 | 3593 | 3615 | 0.862 | 0.802 | ttgaatagggttagAGTTaa<br>aga |
| 113 Ndufa8    | V\$PPAR_RXR.01 | 3427 | 3449 | 0.862 | 0.805 | ttcatgaggcaaaAGTTcc<br>tac  |
| 114 Uqcrc1    | V\$PPAR_RXR.01 | 3899 | 3921 | 0.862 | 0.806 | agttacagggacaaAGTTt<br>ggag |
| 115 Gulo      | V\$PPAR_RXR.01 | 2526 | 2548 | 0.862 | 0.807 | ttgtgggggaaaaAGTTaa<br>aga  |
| 116 Ndufa4    | V\$PPAR_RXR.01 | 2424 | 2446 | 0.862 | 0.808 | tgtagttgggtacAGTTtag<br>gc  |
| 117 Cox4i1    | V\$PPAR_RXR.01 | 2700 | 2722 | 0.862 | 0.809 | aattagctggtcaaAGTTgg<br>agg |
| 118 Gpt2      | V\$PPAR_RXR.01 | 2771 | 2793 | 0.862 | 0.813 | gcaactgaggagaaAGTT<br>ctggt |
| 119 Hspa9     | V\$PPAR_RXR.01 | 3205 | 3227 | 0.862 | 0.813 | atgtgctaggtcagAGTTcc<br>atc |
| 120 Msra      | V\$PPAR_RXR.01 | 5528 | 5550 | 0.862 | 0.816 | tctctgagggacaaAGTTcc<br>cag |
| 121 Hsd17b10  | V\$PPAR_RXR.01 | 4816 | 4838 | 0.862 | 0.817 | ctggaaagggaaaAGTTt<br>agat  |
| 122 Prdx3     | V\$PPAR_RXR.01 | 4161 | 4183 | 0.862 | 0.826 | gtaagtaggaaatAGTTaa<br>act  |
| 123 Hacl1     | V\$PPAR_RXR.01 | 4301 | 4323 | 0.862 | 0.83  | attactttgtaaaAGTTaag<br>ca  |
| 124 Acsm1     | V\$PPAR_RXR.01 | 4428 | 4450 | 0.862 | 0.831 | ctgtgtgtggcacaAGTTaa<br>ggt |
| 125 Gcsh      | V\$PPAR_RXR.01 | 1527 | 1549 | 0.862 | 0.833 | accaagcaggtcagAGTTc<br>taac |
| 126 Cyb5      | V\$PPAR_RXR.01 | 2675 | 2697 | 0.862 | 0.834 | tgacaggaggtaaaAGTTa<br>agca |
| 127 Gstk1     | V\$PPAR_RXR.01 | 4758 | 4780 | 0.862 | 0.837 | tgctgagggacaaAGTTct<br>aga  |
| 128 Nphp3     | V\$PPAR_RXR.01 | 1047 | 1069 | 0.862 | 0.839 | ctgtgaggtcagAGTTca<br>gcc   |
| 128 Uox       | V\$PPAR_RXR.01 | 3879 | 3901 | 0.862 | 0.843 | ggggggggggcagAGTT<br>caaga  |
| 129 Peci      | V\$PPAR_RXR.01 | 3062 | 3084 | 0.862 | 0.845 | gaactccaggtgacAGTTc<br>aac  |
| 130 Peci      | V\$PPAR_RXR.01 | 3073 | 3095 | 0.862 | 0.845 | gaactccaggtgacAGTTc<br>aac  |
| 131 Aldh3a2   | V\$PPAR_RXR.01 | 401  | 423  | 0.862 | 0.847 | ggttaggaggtgaaAGTTta<br>tgc |

|     |          |                |      |      |       |       |                             |
|-----|----------|----------------|------|------|-------|-------|-----------------------------|
| 132 | Bdh1     | V\$PPAR_RXR.01 | 4961 | 4983 | 0.862 | 0.855 | catcgaacgggtaaAGTTc<br>agct |
| 133 | Echs1    | V\$PPAR_RXR.01 | 1497 | 1519 | 0.862 | 0.859 | tagtgaaggccagAGTTc<br>agtc  |
| 134 | Coq9     | V\$PPAR_RXR.01 | 3575 | 3597 | 0.862 | 0.865 | agggatagggtcacAGTTc<br>agtg |
| 135 | Ctsa     | V\$PPAR_RXR.01 | 2256 | 2278 | 0.862 | 0.866 | atcttttaggacaaAGTTtaa<br>gt |
| 136 | Ctsa     | V\$PPAR_RXR.01 | 2228 | 2250 | 0.862 | 0.866 | atcttttaggacaaAGTTtaa<br>gt |
| 137 | Ctsb     | V\$PPAR_RXR.01 | 3032 | 3054 | 0.862 | 0.913 | agcagaaaggtaaAGTT<br>caaga  |
| 138 | Abcd3    | V\$PPAR_RXR.02 | 3580 | 3602 | 1     | 0.69  | taggatgacgtcAAAGctac<br>acc |
| 139 | Actg1    | V\$PPAR_RXR.02 | 936  | 958  | 1     | 0.69  | gcattcaggctcAAAGattta<br>tt |
| 140 | Cox4i1   | V\$PPAR_RXR.02 | 2866 | 2888 | 1     | 0.69  | caaagtggccttAAAGttca<br>agg |
| 141 | Cox5a    | V\$PPAR_RXR.02 | 2781 | 2803 | 1     | 0.69  | agtgctaggattAAAGgtgtg<br>ca |
| 142 | Ctsd     | V\$PPAR_RXR.02 | 4016 | 4038 | 1     | 0.69  | ttcccagggtcAAAGctaca<br>at  |
| 143 | Ctsd     | V\$PPAR_RXR.02 | 4990 | 5012 | 1     | 0.69  | cccgaagagagcAAAGcct<br>aaag |
| 144 | Lamp2    | V\$PPAR_RXR.02 | 805  | 827  | 1     | 0.69  | cagtgaggggacAAAGgg<br>attga |
| 145 | Ndufa8   | V\$PPAR_RXR.02 | 3640 | 3662 | 1     | 0.69  | ggttaaagggtaAAAGgga<br>gcct |
| 146 | Slc25a10 | V\$PPAR_RXR.02 | 2066 | 2088 | 1     | 0.69  | ggatttgattcAAAGgcag<br>cct  |
| 147 | Mdh2     | V\$PPAR_RXR.02 | 1589 | 1611 | 1     | 0.691 | agcactggcatcAAAGgtat<br>gta |
| 148 | Sod2     | V\$PPAR_RXR.02 | 3600 | 3622 | 1     | 0.691 | agtgtgggatcAAAGgcat<br>gtg  |
| 149 | Uqcrc1   | V\$PPAR_RXR.02 | 907  | 929  | 1     | 0.691 | gggaaaagagtaAAAGggt<br>gtta |
| 150 | Ctsa     | V\$PPAR_RXR.02 | 4528 | 4550 | 1     | 0.692 | agtgtgggatcAAAGgcgt<br>gtg  |
| 151 | Ctsa     | V\$PPAR_RXR.02 | 4500 | 4522 | 1     | 0.692 | agtgtgggatcAAAGgcgt<br>gtg  |
| 152 | Them2    | V\$PPAR_RXR.02 | 1715 | 1737 | 1     | 0.692 | aaaaccaggatgAAAGttg<br>agtc |
| 153 | Aadac    | V\$PPAR_RXR.02 | 4359 | 4381 | 1     | 0.693 | aatattggactaAAAGgtga<br>gaa |
| 154 | Hspe1    | V\$PPAR_RXR.02 | 858  | 880  | 1     | 0.693 | agtgtaggattAAAGgtgg<br>gca  |
| 155 | Gpt2     | V\$PPAR_RXR.02 | 1536 | 1558 | 1     | 0.694 | gcttaaaggatcAAAGattc<br>agt |
| 156 | Ldhd     | V\$PPAR_RXR.02 | 1306 | 1328 | 1     | 0.694 | agggatgagattAAAGgttt<br>gtg |
| 157 | Ndufa6   | V\$PPAR_RXR.02 | 1078 | 1100 | 1     | 0.694 | agtgtgagattAAAGgtgtg<br>tg  |
| 158 | Ndufa7   | V\$PPAR_RXR.02 | 906  | 928  | 1     | 0.694 | gtctctgtctcAAAGctgatt<br>g  |

Wei, J. et al. (2009)  
*Biochem J* **421**, 311-  
322

|     |               |                |      |      |   |       |                             |
|-----|---------------|----------------|------|------|---|-------|-----------------------------|
| 159 | 2010309E21Rik | V\$PPAR_RXR.02 | 368  | 390  | 1 | 0.695 | cacttggggaacAAAGttga<br>tgg |
| 160 | Cox5a         | V\$PPAR_RXR.02 | 2433 | 2455 | 1 | 0.695 | cggggagggataAAAGga<br>aacat |
| 161 | Got2          | V\$PPAR_RXR.02 | 4666 | 4688 | 1 | 0.696 | actagtgggtgAAAGgaaa<br>acc  |
| 162 | Ndufa10       | V\$PPAR_RXR.02 | 4705 | 4727 | 1 | 0.696 | gaacccgagctcAAAGctg<br>ggag |
| 163 | Ndufa7        | V\$PPAR_RXR.02 | 3762 | 3784 | 1 | 0.696 | ctagtgggttgAAAGgtaa<br>tat  |
| 164 | Acaa1a        | V\$PPAR_RXR.02 | 365  | 387  | 1 | 0.697 | cccagggagtcAAAGatg<br>taga  |
| 165 | Atp5j2        | V\$PPAR_RXR.02 | 1543 | 1565 | 1 | 0.697 | tatgttgagattAAAGgtgcc<br>ca |
| 166 | Bdh1          | V\$PPAR_RXR.02 | 3530 | 3552 | 1 | 0.697 | agtgtgggttAAAGgctg<br>gcg   |
| 167 | Bdh1          | V\$PPAR_RXR.02 | 3028 | 3050 | 1 | 0.697 | agtgtgggttAAAGgctg<br>gcg   |
| 168 | Gldc          | V\$PPAR_RXR.02 | 3126 | 3148 | 1 | 0.697 | ggtgtgggttAAAGgctg<br>gca   |
| 169 | Uqcrb         | V\$PPAR_RXR.02 | 3038 | 3060 | 1 | 0.697 | agcggcagggtgAAAGatg<br>ctaa |
| 170 | Psap          | V\$PPAR_RXR.02 | 2465 | 2487 | 1 | 0.698 | tcctatgagttcAAAGctagc<br>tt |
| 171 | Psap          | V\$PPAR_RXR.02 | 2551 | 2573 | 1 | 0.698 | tcctatgagttcAAAGctagc<br>tt |
| 172 | 1100001H23Rik | V\$PPAR_RXR.02 | 2518 | 2540 | 1 | 0.699 | taaggagagctcAAAGttag<br>ggt |
| 173 | Cyb5          | V\$PPAR_RXR.02 | 4775 | 4797 | 1 | 0.699 | tggcttgggtaAAAGtgaa<br>agg  |
| 174 | Cyp2e1        | V\$PPAR_RXR.02 | 1558 | 1580 | 1 | 0.699 | agtgtgggattAAAGgtatg<br>tg  |
| 175 | Echdc2        | V\$PPAR_RXR.02 | 2962 | 2984 | 1 | 0.699 | agtgtgggattAAAGgtatg<br>tg  |
| 176 | Echdc2        | V\$PPAR_RXR.02 | 2910 | 2932 | 1 | 0.699 | agtgtgggattAAAGgtatg<br>tg  |
| 177 | Hsd17b4       | V\$PPAR_RXR.02 | 1311 | 1333 | 1 | 0.699 | agagccgggattAAAGgtgt<br>gta |
| 178 | Slc25a1       | V\$PPAR_RXR.02 | 1855 | 1877 | 1 | 0.699 | agtgtgggattAAAGgtatg<br>tg  |
| 179 | Sod1          | V\$PPAR_RXR.02 | 2847 | 2869 | 1 | 0.699 | agtgtgggattAAAGgtatg<br>ta  |
| 180 | 2810422J05Rik | V\$PPAR_RXR.02 | 918  | 940  | 1 | 0.7   | gctcctgggattAAAGgtgtg<br>tg |
| 181 | Bdh1          | V\$PPAR_RXR.02 | 1779 | 1801 | 1 | 0.7   | agtgtgggattAAAGgtgtg<br>ta  |
| 182 | Ctsa          | V\$PPAR_RXR.02 | 3580 | 3602 | 1 | 0.7   | agtgtgggattAAAGgtgtg<br>tg  |
| 183 | Ctsa          | V\$PPAR_RXR.02 | 3719 | 3741 | 1 | 0.7   | aatgtgggattAAAGgtgtg<br>tg  |
| 184 | Ctsa          | V\$PPAR_RXR.02 | 3552 | 3574 | 1 | 0.7   | agtgtgggattAAAGgtgtg<br>tg  |
| 185 | Ctsa          | V\$PPAR_RXR.02 | 3691 | 3713 | 1 | 0.7   | aatgtgggattAAAGgtgtg<br>tg  |

|     |         |                |      |      |   |       |                              |                                                                             |
|-----|---------|----------------|------|------|---|-------|------------------------------|-----------------------------------------------------------------------------|
| 186 | Cyp2a22 | V\$PPAR_RXR.02 | 3829 | 3851 | 1 | 0.7   | aatgctgggattAAAAGgtgtg<br>tg |                                                                             |
| 187 | Echdc2  | V\$PPAR_RXR.02 | 1724 | 1746 | 1 | 0.7   | agtgctgggattAAAAGgtgtg<br>tg |                                                                             |
| 188 | Echdc2  | V\$PPAR_RXR.02 | 1672 | 1694 | 1 | 0.7   | agtgctgggattAAAAGgtgtg<br>tg |                                                                             |
| 189 | Gcsh    | V\$PPAR_RXR.02 | 3157 | 3179 | 1 | 0.7   | agtgctgggattAAAAGgtgtg<br>tg |                                                                             |
| 190 | Gpt2    | V\$PPAR_RXR.02 | 3836 | 3858 | 1 | 0.7   | ttatctgggattAAAGgtgtgt<br>g  |                                                                             |
| 191 | Hsd12   | V\$PPAR_RXR.02 | 2081 | 2103 | 1 | 0.7   | agtgctgggattAAAAGgtgtg<br>tg |                                                                             |
| 192 | Ndufa7  | V\$PPAR_RXR.02 | 1491 | 1513 | 1 | 0.7   | aatgctgggattAAAAGgtgtg<br>tg |                                                                             |
| 193 | Ndufa8  | V\$PPAR_RXR.02 | 3226 | 3248 | 1 | 0.7   | agtgctgggattAAAAGgtgtg<br>tg |                                                                             |
| 194 | Psap    | V\$PPAR_RXR.02 | 4116 | 4138 | 1 | 0.7   | gctgctgggattAAAAGgtgtg<br>tg |                                                                             |
| 195 | Psap    | V\$PPAR_RXR.02 | 4202 | 4224 | 1 | 0.7   | gctgctgggattAAAAGgtgtg<br>tg |                                                                             |
| 196 | Sod2    | V\$PPAR_RXR.02 | 2176 | 2198 | 1 | 0.7   | tctcctgggattAAAGgtgtgt<br>a  |                                                                             |
| 197 | Aldh1b1 | V\$PPAR_RXR.02 | 177  | 199  | 1 | 0.701 | agtctgggattAAAAGgtgtg<br>gg  |                                                                             |
| 198 | Cox4i1  | V\$PPAR_RXR.02 | 1831 | 1853 | 1 | 0.701 | atgtgctctgccAAAAGgaca<br>gca |                                                                             |
| 199 | Cox6b1  | V\$PPAR_RXR.02 | 210  | 232  | 1 | 0.701 | aatgctgggattAAAAGgtatg<br>cg |                                                                             |
| 200 | Opa1    | V\$PPAR_RXR.02 | 357  | 379  | 1 | 0.701 | tctgctgggattAAAAGgtatg<br>cg |                                                                             |
| 201 | Peci    | V\$PPAR_RXR.02 | 384  | 406  | 1 | 0.701 | gccatagggattAAAAGgtat<br>gtc |                                                                             |
| 202 | Peci    | V\$PPAR_RXR.02 | 395  | 417  | 1 | 0.701 | gccatagggattAAAAGgtat<br>gtc |                                                                             |
| 203 | Them2   | V\$PPAR_RXR.02 | 3657 | 3679 | 1 | 0.701 | agtactgggattAAAAGgtttgt<br>g | Wei, J. et al. (2009)<br><i>Biochem J</i> <b>421</b> , 311-<br>323          |
| 204 | Acox1   | V\$PPAR_RXR.02 | 3576 | 3598 | 1 | 0.702 | agtgctgggattAAAAGgtgtg<br>cg | Varanasi, U. et al.<br>(1996). <i>J Biol Chem</i><br><b>271</b> , 2147-2155 |
| 205 | Adhfe1  | V\$PPAR_RXR.02 | 1272 | 1294 | 1 | 0.702 | agtgctgggattAAAAGgtgtg<br>ca |                                                                             |
| 206 | Aldh7a1 | V\$PPAR_RXR.02 | 4388 | 4410 | 1 | 0.702 | agtgctgggattAAAAGgtgtg<br>cg |                                                                             |
| 207 | Ctsh    | V\$PPAR_RXR.02 | 4493 | 4515 | 1 | 0.702 | agtgctgggattAAAAGgtgtg<br>cg |                                                                             |
| 208 | Echdc2  | V\$PPAR_RXR.02 | 2549 | 2571 | 1 | 0.702 | agtactgggattAAAAGgtgtg<br>cg |                                                                             |
| 209 | Echdc2  | V\$PPAR_RXR.02 | 2497 | 2519 | 1 | 0.702 | agtactgggattAAAAGgtgtg<br>cg |                                                                             |
| 209 | Gcsh    | V\$PPAR_RXR.02 | 3469 | 3491 | 1 | 0.702 | agtgctgggattAAAAGgtgtg<br>cg |                                                                             |
| 210 | Gpt2    | V\$PPAR_RXR.02 | 3561 | 3583 | 1 | 0.702 | agtgctgggattAAAAGgtgtg<br>ca |                                                                             |

|     |               |                |      |      |   |       |                              |
|-----|---------------|----------------|------|------|---|-------|------------------------------|
| 211 | Ndufb9        | V\$PPAR_RXR.02 | 1413 | 1435 | 1 | 0.702 | ttgttgggattAAAGgtgtg<br>a    |
| 212 | P4hb          | V\$PPAR_RXR.02 | 3042 | 3064 | 1 | 0.702 | aatactgggattAAAGgtgtg<br>cc  |
| 213 | Slc25a10      | V\$PPAR_RXR.02 | 194  | 216  | 1 | 0.702 | atggtggggctcAAAGctgg<br>gac  |
| 214 | Slc25a10      | V\$PPAR_RXR.02 | 844  | 866  | 1 | 0.702 | agtgtgggattAAAGgtgtg<br>ca   |
| 215 | Vdac2         | V\$PPAR_RXR.02 | 4078 | 4100 | 1 | 0.702 | agtgtgggattAAAGgtgtg<br>ca   |
| 216 | Acad8         | V\$PPAR_RXR.02 | 1749 | 1771 | 1 | 0.703 | agtgtgggattAAAGgtgta<br>cg   |
| 217 | Clpp          | V\$PPAR_RXR.02 | 2641 | 2663 | 1 | 0.703 | agtgtgggattAAAGgtgta<br>ca   |
| 218 | Ech1          | V\$PPAR_RXR.02 | 2192 | 2214 | 1 | 0.703 | agtcagggattAAAGgtgt<br>gca   |
| 219 | Glud1         | V\$PPAR_RXR.02 | 2868 | 2890 | 1 | 0.704 | agtgtgggatgAAAGgtgt<br>gag   |
| 220 | Cps1          | V\$PPAR_RXR.02 | 4699 | 4721 | 1 | 0.705 | tactcctcttcAAAGggcagt<br>a   |
| 221 | Sdhb          | V\$PPAR_RXR.02 | 2007 | 2029 | 1 | 0.705 | gacgctgagggtgAAAGctg<br>gcaa |
| 222 | Cps1          | V\$PPAR_RXR.02 | 2318 | 2340 | 1 | 0.706 | tacaacttaatcAAAGgaca<br>att  |
| 223 | Es31          | V\$PPAR_RXR.02 | 2538 | 2560 | 1 | 0.706 | ttcacctcaaccAAAGgtcat<br>tc  |
| 224 | Es31          | V\$PPAR_RXR.02 | 2538 | 2560 | 1 | 0.706 | ttcacctcaaccAAAGgtcat<br>tc  |
| 225 | Prdx3         | V\$PPAR_RXR.02 | 3358 | 3380 | 1 | 0.706 | gactgtcttccAAAGgtcag<br>ga   |
| 226 | 2010309E21Rik | V\$PPAR_RXR.02 | 3808 | 3830 | 1 | 0.707 | acagcttttctcAAAGgaca<br>atg  |
| 227 | Got2          | V\$PPAR_RXR.02 | 428  | 450  | 1 | 0.709 | ggaaatactgccAAAGgac<br>aggg  |
| 228 | Agxt          | V\$PPAR_RXR.02 | 4864 | 4886 | 1 | 0.71  | tggtgtcctgtcAAAGaaca<br>gca  |
| 229 | Bdh1          | V\$PPAR_RXR.02 | 1114 | 1136 | 1 | 0.71  | ctcagaccacAAAGgtc<br>acat    |
| 230 | Ppt1          | V\$PPAR_RXR.02 | 1514 | 1536 | 1 | 0.711 | ttgtgacctgtcAAAGgtcat<br>ga  |
| 231 | Ndufa6        | V\$PPAR_RXR.02 | 3864 | 3886 | 1 | 0.712 | gtacttcagtcAAAGtaca<br>atg   |
| 232 | Mpst          | V\$PPAR_RXR.02 | 1457 | 1479 | 1 | 0.714 | acggcactgggcAAAGtcc<br>aggg  |
| 233 | Ndufs8        | V\$PPAR_RXR.02 | 3987 | 4009 | 1 | 0.716 | cctatcttattcAAAGgtccaa<br>a  |
| 234 | D10Jhu81e     | V\$PPAR_RXR.02 | 3346 | 3368 | 1 | 0.717 | gtacatactggcAAAGatca<br>gtc  |
| 235 | Nipsnap1      | V\$PPAR_RXR.02 | 1507 | 1529 | 1 | 0.717 | gactgtctttcAAAGgtctg<br>a    |
| 236 | Acot2         | V\$PPAR_RXR.02 | 2112 | 2134 | 1 | 0.718 | aaacaatttctcAAAGttcag<br>tt  |
| 237 | Cpox          | V\$PPAR_RXR.02 | 4437 | 4459 | 1 | 0.718 | tcaaggatagttAAAGggca<br>aat  |

|     |          |                |      |      |   |       |                             |
|-----|----------|----------------|------|------|---|-------|-----------------------------|
| 238 | Slc25a15 | V\$PPAR_RXR.02 | 762  | 784  | 1 | 0.718 | actcccactgccAAAGgtctt<br>tt |
| 239 | Dhrs4    | V\$PPAR_RXR.02 | 5046 | 5068 | 1 | 0.719 | aggggactgttcAAAGggc<br>ggga |
| 240 | Ephx2    | V\$PPAR_RXR.02 | 653  | 675  | 1 | 0.719 | agctctctatcAAAGttcatg<br>a  |
| 241 | Glyat    | V\$PPAR_RXR.02 | 3635 | 3657 | 1 | 0.72  | ccctagcctgtcAAAGttccc<br>tc |
| 242 | Hrsp12   | V\$PPAR_RXR.02 | 596  | 618  | 1 | 0.721 | tgcttctgttAAAGttcactt       |
| 243 | Cyp2a22  | V\$PPAR_RXR.02 | 971  | 993  | 1 | 0.723 | ttcatactcatcAAAGgtaaa<br>at |
| 244 | Pitrm1   | V\$PPAR_RXR.02 | 1988 | 2010 | 1 | 0.723 | aagtacaccataAAAGgtc<br>acaa |
| 245 | Agxt     | V\$PPAR_RXR.02 | 172  | 194  | 1 | 0.724 | tgctgccagtcAAAGgtag<br>gct  |
| 246 | Ctsd     | V\$PPAR_RXR.02 | 238  | 260  | 1 | 0.724 | gaactctagttAAAGgtgatt<br>a  |
| 247 | Aldh1b1  | V\$PPAR_RXR.02 | 4203 | 4225 | 1 | 0.725 | ttattactggtcAAAGgagtg<br>g  |
| 248 | Hspe1    | V\$PPAR_RXR.02 | 3450 | 3472 | 1 | 0.725 | cagcatctgctaAAAGgtct<br>aca |
| 249 | Ndufa4   | V\$PPAR_RXR.02 | 1064 | 1086 | 1 | 0.726 | aaatatgtgaacAAAGgcc<br>aata |
| 250 | Hsd17b10 | V\$PPAR_RXR.02 | 2809 | 2831 | 1 | 0.727 | gtcacagcaagcAAAGgtc<br>agca |
| 251 | Acox1    | V\$PPAR_RXR.02 | 296  | 318  | 1 | 0.728 | caggagatggtaAAAGgac<br>cccc |
| 252 | Chdh     | V\$PPAR_RXR.02 | 2748 | 2770 | 1 | 0.728 | aaggcctgagacAAAGga<br>cagca |
| 253 | Baat     | V\$PPAR_RXR.02 | 4834 | 4856 | 1 | 0.729 | actgttgctgtcAAAGacca<br>gag |
| 254 | Ndufa4   | V\$PPAR_RXR.02 | 2162 | 2184 | 1 | 0.729 | agtcacctgatcAAAGctga<br>tgc |
| 255 | Pgcp     | V\$PPAR_RXR.02 | 3835 | 3857 | 1 | 0.729 | acgcgactagtcAAAGttta<br>gag |
| 256 | Chdh     | V\$PPAR_RXR.02 | 4867 | 4889 | 1 | 0.731 | agaacctatgtaAAAGgcc<br>atgt |
| 257 | Cox4i1   | V\$PPAR_RXR.02 | 1702 | 1724 | 1 | 0.731 | actgcctacgtcAAAGggctt<br>ga |
| 258 | Gpt2     | V\$PPAR_RXR.02 | 1438 | 1460 | 1 | 0.731 | gcacagtgactcAAAGgac<br>agtg |
| 259 | P4hb     | V\$PPAR_RXR.02 | 2755 | 2777 | 1 | 0.731 | gtacaattgctcAAAGttcga<br>ga |
| 260 | Scpep1   | V\$PPAR_RXR.02 | 312  | 334  | 1 | 0.731 | cactaagctgacAAAGatc<br>agcc |
| 261 | Cyb5     | V\$PPAR_RXR.02 | 2756 | 2778 | 1 | 0.732 | tgacaagttgtcAAAGccca<br>ttg |
| 262 | Bdh1     | V\$PPAR_RXR.02 | 1840 | 1862 | 1 | 0.733 | tctgtacatggcAAAGatcat<br>tt |
| 263 | Bdh1     | V\$PPAR_RXR.02 | 1338 | 1360 | 1 | 0.733 | tctgtacatggcAAAGatcat<br>tt |
| 264 | Cycs     | V\$PPAR_RXR.02 | 148  | 170  | 1 | 0.734 | cacataattgtaAAAGgtaa<br>aag |

Varanasi, U. et al.  
(1996). *J Biol Chem*  
**271**, 2147-2156

|     |           |                |      |      |   |       |                              |
|-----|-----------|----------------|------|------|---|-------|------------------------------|
| 265 | Gulo      | V\$PPAR_RXR.02 | 949  | 971  | 1 | 0.734 | ttgtaaactgttAAAGGtaatt<br>a  |
| 266 | Cat       | V\$PPAR_RXR.02 | 2595 | 2617 | 1 | 0.735 | aaagaattgctcAAAGTtga<br>aca  |
| 267 | Nipsnap3a | V\$PPAR_RXR.02 | 3972 | 3994 | 1 | 0.735 | aaaggacggaacAAAGGga<br>caata |
| 268 | Opa1      | V\$PPAR_RXR.02 | 2049 | 2071 | 1 | 0.735 | acaaataaaaacAAAGGtc<br>attc  |
| 269 | Gcdh      | V\$PPAR_RXR.02 | 2470 | 2492 | 1 | 0.736 | ggcagacatgtgAAAGgcc<br>acat  |
| 270 | Gcdh      | V\$PPAR_RXR.02 | 2470 | 2492 | 1 | 0.736 | ggcagacatgtgAAAGgcc<br>acat  |
| 271 | Hsd17b10  | V\$PPAR_RXR.02 | 378  | 400  | 1 | 0.736 | tctcaacaaatcAAAGatca<br>gtg  |
| 272 | MsrA      | V\$PPAR_RXR.02 | 821  | 843  | 1 | 0.736 | aagccctaccttAAAGgtca<br>aat  |
| 273 | Gpt2      | V\$PPAR_RXR.02 | 809  | 831  | 1 | 0.737 | aagaaagtttcAAAGctca<br>gat   |
| 274 | Nipsnap1  | V\$PPAR_RXR.02 | 2133 | 2155 | 1 | 0.737 | ttaagaaaactcAAAGggc<br>agca  |
| 275 | Slc25a5   | V\$PPAR_RXR.02 | 4087 | 4109 | 1 | 0.737 | ctggaaagtccAAAGgac<br>agac   |
| 276 | Gpt2      | V\$PPAR_RXR.02 | 316  | 338  | 1 | 0.738 | tcagagaaggatAAAGgac<br>agcg  |
| 277 | Mut       | V\$PPAR_RXR.02 | 4268 | 4290 | 1 | 0.738 | gcgtgacagctcAAAGaac<br>attt  |
| 278 | Dhrs4     | V\$PPAR_RXR.02 | 3114 | 3136 | 1 | 0.739 | tcttaagccatcAAAGttcact<br>a  |
| 279 | Ndufb9    | V\$PPAR_RXR.02 | 3796 | 3818 | 1 | 0.739 | cattcgtgagttAAAGgacat<br>cc  |
| 280 | Scp2      | V\$PPAR_RXR.02 | 837  | 859  | 1 | 0.739 | gaaagacagatcAAAGcg<br>catgc  |
| 281 | Baat      | V\$PPAR_RXR.02 | 3401 | 3423 | 1 | 0.741 | tcttctgcctcAAAGgtctgg<br>a   |
| 282 | Mut       | V\$PPAR_RXR.02 | 2764 | 2786 | 1 | 0.741 | cttaagcatttcAAAGGtaatt<br>a  |
| 283 | Pcx       | V\$PPAR_RXR.02 | 594  | 616  | 1 | 0.741 | aagggacagatgAAAGGga<br>catgt |
| 284 | Sod2      | V\$PPAR_RXR.02 | 4355 | 4377 | 1 | 0.741 | cgaccaaataAAAGgac<br>attg    |
| 285 | Ndufa7    | V\$PPAR_RXR.02 | 3663 | 3685 | 1 | 0.742 | atccgaaatgtcAAAGgccc<br>cgt  |
| 286 | Timm13    | V\$PPAR_RXR.02 | 4740 | 4762 | 1 | 0.742 | tttctagaagccAAAGgaca<br>gtg  |
| 287 | Aass      | V\$PPAR_RXR.02 | 3320 | 3342 | 1 | 0.744 | agcttagtggtgAAAGtgca<br>gcc  |
| 288 | Gstk1     | V\$PPAR_RXR.02 | 854  | 876  | 1 | 0.744 | taagagagagttAAAGgcc<br>agag  |
| 289 | Gcdh      | V\$PPAR_RXR.02 | 962  | 984  | 1 | 0.745 | gatctctgagttAAAGatcag<br>cc  |
| 290 | Gcdh      | V\$PPAR_RXR.02 | 962  | 984  | 1 | 0.745 | gatctctgagttAAAGatcag<br>cc  |

Girnun, G. D., et al.  
(2002). *Molecular  
Endocrinology* **16**,  
2793-2801



|             |                |      |      |   |       |                             |
|-------------|----------------|------|------|---|-------|-----------------------------|
| 291 Pgcg    | V\$PPAR_RXR.02 | 3870 | 3892 | 1 | 0.745 | tgtacataggtgAAAGgact<br>caa |
| 291 Phyh    | V\$PPAR_RXR.02 | 3896 | 3918 | 1 | 0.745 | aggtaaggcacAAAGgg<br>caaat  |
| 292 Ctsa    | V\$PPAR_RXR.02 | 1042 | 1064 | 1 | 0.746 | gtccaggagcccAAAGgac<br>aact |
| 293 Ctsa    | V\$PPAR_RXR.02 | 1014 | 1036 | 1 | 0.746 | gtccaggagcccAAAGgac<br>aact |
| 294 Aldh7a1 | V\$PPAR_RXR.02 | 2402 | 2424 | 1 | 0.747 | aataaatggttAAAGggcat<br>ag  |
| 295 Cyp2a22 | V\$PPAR_RXR.02 | 890  | 912  | 1 | 0.747 | ttagtaaagctcAAAGcaca<br>cat |
| 296 Hsd17b4 | V\$PPAR_RXR.02 | 3768 | 3790 | 1 | 0.747 | gcctcaacttcAAAGttcac<br>at  |
| 297 Lamp2   | V\$PPAR_RXR.02 | 262  | 284  | 1 | 0.747 | gagaaagtggtcAAAGtag<br>aggt |
| 298 Fabp1   | V\$PPAR_RXR.02 | 1824 | 1846 | 1 | 0.748 | gcaaagtggtcAAAGgat<br>aatg  |
| 299 Uqrcr1  | V\$PPAR_RXR.02 | 2408 | 2430 | 1 | 0.748 | tgtcaaagttcAAAGaaca<br>aca  |
| 300 Lamp2   | V\$PPAR_RXR.02 | 2197 | 2219 | 1 | 0.749 | tgcgactagttcAAAGgtatt<br>a  |
| 301 Vapa    | V\$PPAR_RXR.02 | 1282 | 1304 | 1 | 0.749 | ctgtaaagagtcAAAGtaca<br>ata |
| 302 Acsm1   | V\$PPAR_RXR.02 | 3853 | 3875 | 1 | 0.75  | atccaaagggccAAAGgtc<br>aaaa |
| 303 Hsd12   | V\$PPAR_RXR.02 | 3785 | 3807 | 1 | 0.75  | ggtatcaggttAAAGgacag<br>ca  |
| 304 Nphp3   | V\$PPAR_RXR.02 | 2328 | 2350 | 1 | 0.75  | atggtaaagatcAAAGgga<br>aatg |
| 305 Uqcrb   | V\$PPAR_RXR.02 | 817  | 839  | 1 | 0.75  | catgtggatgccAAAGgtct<br>aag |
| 306 Acad8   | V\$PPAR_RXR.02 | 2593 | 2615 | 1 | 0.752 | cctgtatgagtgAAAGgtcct<br>ga |
| 307 Adhfe1  | V\$PPAR_RXR.02 | 609  | 631  | 1 | 0.752 | atagggaagtcAAAGatg<br>aatt  |
| 308 Scpep1  | V\$PPAR_RXR.02 | 5010 | 5032 | 1 | 0.752 | caggcaggagccAAAGgc<br>catcg |
| 309 Coq9    | V\$PPAR_RXR.02 | 1858 | 1880 | 1 | 0.753 | tacagggatgtcAAAGgca<br>aggc |
| 310 Ech1    | V\$PPAR_RXR.02 | 3257 | 3279 | 1 | 0.753 | aggagagagggcAAAGag<br>caaac |
| 311 Shmt2   | V\$PPAR_RXR.02 | 4471 | 4493 | 1 | 0.753 | acagagagattgAAAGgtc<br>aagg |
| 312 Uqcrb   | V\$PPAR_RXR.02 | 1572 | 1594 | 1 | 0.753 | gcagttcagttgAAAGgtaa<br>aac |
| 313 Acot2   | V\$PPAR_RXR.02 | 1359 | 1381 | 1 | 0.755 | tagtaggaataAAAGgtca<br>taa  |
| 314 Chdh    | V\$PPAR_RXR.02 | 809  | 831  | 1 | 0.755 | aaaaaaaaagtcAAAGcta<br>aagc |
| 315 Ephx2   | V\$PPAR_RXR.02 | 1392 | 1414 | 1 | 0.756 | cattgggaattcAAAGgtcc<br>cat |
| 316 Pccb    | V\$PPAR_RXR.02 | 3171 | 3193 | 1 | 0.756 | agtaggtggctcAAAGatga<br>tta |

|     |           |                |      |      |   |       |                              |
|-----|-----------|----------------|------|------|---|-------|------------------------------|
| 317 | Es31      | V\$PPAR_RXR.02 | 4816 | 4838 | 1 | 0.757 | ggatcaggggatAAAGgac<br>agtc  |
| 318 | Es31      | V\$PPAR_RXR.02 | 4816 | 4838 | 1 | 0.757 | ggatcaggggatAAAGgac<br>agtc  |
| 319 | Uqcrb     | V\$PPAR_RXR.02 | 1256 | 1278 | 1 | 0.757 | agaggaagcatcAAAGgta<br>agca  |
| 320 | Abcd3     | V\$PPAR_RXR.02 | 1864 | 1886 | 1 | 0.758 | agaccaggaggcAAAGct<br>cagga  |
| 321 | Fh1       | V\$PPAR_RXR.02 | 1115 | 1137 | 1 | 0.758 | agaactgatatcAAAGttca<br>aat  |
| 322 | Glyat     | V\$PPAR_RXR.02 | 4982 | 5004 | 1 | 0.758 | gcaagtgggggcAAAGag<br>caaag  |
| 323 | Kmo       | V\$PPAR_RXR.02 | 2260 | 2282 | 1 | 0.758 | agaactgatatcAAAGttca<br>aat  |
| 324 | Tomm70a   | V\$PPAR_RXR.02 | 2574 | 2596 | 1 | 0.758 | catatgtggatcAAAGcttat<br>aa  |
| 325 | Agxt      | V\$PPAR_RXR.02 | 2240 | 2262 | 1 | 0.759 | aatgcagactcAAAGctca<br>tgt   |
| 326 | Ldhd      | V\$PPAR_RXR.02 | 2141 | 2163 | 1 | 0.759 | tcaacagagatcAAAGtcc<br>agag  |
| 327 | Ppt1      | V\$PPAR_RXR.02 | 528  | 550  | 1 | 0.759 | agggaggagttcAAAGtgc<br>atat  |
| 328 | Bdh1      | V\$PPAR_RXR.01 | 2010 | 2032 | 1 | 0.76  | aacctgtgggaaccAGGTc<br>atta  |
| 329 | Bdh1      | V\$PPAR_RXR.01 | 1508 | 1530 | 1 | 0.76  | aacctgtgggaaccAGGTc<br>atta  |
| 330 | Chdh      | V\$PPAR_RXR.02 | 2643 | 2665 | 1 | 0.76  | aatgccgggggcAAAGga<br>aagga  |
| 331 | Pgcp      | V\$PPAR_RXR.01 | 3863 | 3885 | 1 | 0.76  | ggtatattgtacatAGGTgaa<br>ag  |
| 332 | Aldh3a2   | V\$PPAR_RXR.02 | 3682 | 3704 | 1 | 0.761 | gcggatggtctcAAAGatca<br>gaa  |
| 333 | Chdh      | V\$PPAR_RXR.02 | 1392 | 1414 | 1 | 0.761 | aggccagggtgacAAAGttc<br>attt |
| 334 | Cyp4a14   | V\$PPAR_RXR.01 | 3078 | 3100 | 1 | 0.761 | tggaaatagaacatAGGTc<br>ccct  |
| 335 | Asah1     | V\$PPAR_RXR.01 | 1461 | 1483 | 1 | 0.762 | agacttaggggtacAGGTgt<br>gta  |
| 336 | Mdh2      | V\$PPAR_RXR.01 | 1371 | 1393 | 1 | 0.762 | tgtagagggggcAGGTc<br>atgt    |
| 337 | Coq9      | V\$PPAR_RXR.01 | 495  | 517  | 1 | 0.763 | attactaggggtacAGGTatg<br>ca  |
| 338 | Por       | V\$PPAR_RXR.02 | 1631 | 1653 | 1 | 0.763 | agtactgagattAAAGgtctg<br>ag  |
| 339 | Actg1     | V\$PPAR_RXR.01 | 1713 | 1735 | 1 | 0.764 | cataacaggagcaAGGT<br>cctga   |
| 340 | Ctsh      | V\$PPAR_RXR.01 | 990  | 1012 | 1 | 0.764 | ttgttcagggtgacAGGTggg<br>at  |
| 341 | Ndufs8    | V\$PPAR_RXR.01 | 4115 | 4137 | 1 | 0.764 | gtgataatcggcacAGGTc<br>atac  |
| 342 | Nipsnap3a | V\$PPAR_RXR.01 | 826  | 848  | 1 | 0.764 | cttactcaggaacaAGGTa<br>aata  |
| 343 | Slc25a10  | V\$PPAR_RXR.01 | 2886 | 2908 | 1 | 0.764 | gtttctgagctagAGGTcag<br>at   |

|     |           |                |      |      |   |       |                             |                                                                             |
|-----|-----------|----------------|------|------|---|-------|-----------------------------|-----------------------------------------------------------------------------|
| 344 | Sod1      | V\$PPAR_RXR.01 | 3274 | 3296 | 1 | 0.764 | tatggaatgagcaaAGGTt<br>aaca |                                                                             |
| 345 | Acox1     | V\$PPAR_RXR.02 | 19   | 41   | 1 | 0.765 | agtgctaggatcAAAGgtgt<br>gca | Varanasi, U. et al.<br>(1996). <i>J Biol Chem</i><br><b>271</b> , 2147-2157 |
| 346 | Aldh7a1   | V\$PPAR_RXR.01 | 2296 | 2318 | 1 | 0.765 | tacctcatgtgtacAGGTca<br>gag |                                                                             |
| 347 | Cox4i1    | V\$PPAR_RXR.01 | 2984 | 3006 | 1 | 0.765 | ttagtggtggttatAGGTgtct<br>g |                                                                             |
| 348 | Ndufs8    | V\$PPAR_RXR.02 | 3697 | 3719 | 1 | 0.765 | ggagaaggtgtcAAAGgag<br>aact |                                                                             |
| 349 | Nipsnap3a | V\$PPAR_RXR.01 | 4553 | 4575 | 1 | 0.765 | tcagaggccgtcagAGGTc<br>agct |                                                                             |
| 350 | Por       | V\$PPAR_RXR.01 | 4067 | 4089 | 1 | 0.765 | ccttcagtggccagAGGTg<br>ggac |                                                                             |
| 351 | Scpep1    | V\$PPAR_RXR.02 | 410  | 432  | 1 | 0.765 | ggttttgagttcAAAGttctgta     |                                                                             |
| 352 | Aldh3a2   | V\$PPAR_RXR.01 | 1528 | 1550 | 1 | 0.766 | gctgccttggttaAGGTtatt       |                                                                             |
| 353 | Fabp1     | V\$PPAR_RXR.01 | 2592 | 2614 | 1 | 0.766 | tctcatcatgccaaAGGTaa<br>tga |                                                                             |
| 354 | Fh1       | V\$PPAR_RXR.01 | 4763 | 4785 | 1 | 0.766 | agacaagaggcgggAGGT<br>cagat |                                                                             |
| 355 | Ndufa10   | V\$PPAR_RXR.02 | 3003 | 3025 | 1 | 0.766 | agcatagaagtcAAAGctg<br>aata |                                                                             |
| 356 | Uqcrc1    | V\$PPAR_RXR.01 | 4757 | 4779 | 1 | 0.766 | cctcaggtggaagaAGGTg<br>atga |                                                                             |
| 357 | Aass      | V\$PPAR_RXR.01 | 295  | 317  | 1 | 0.767 | cataaagaggaaagAGGT<br>aggta |                                                                             |
| 358 | Asah1     | V\$PPAR_RXR.01 | 1269 | 1291 | 1 | 0.767 | ccaggaaagaataaAGGT<br>gataa |                                                                             |
| 359 | Cps1      | V\$PPAR_RXR.02 | 4948 | 4970 | 1 | 0.767 | gaatgggagtcAAAGatc<br>gctg  |                                                                             |
| 360 | Got2      | V\$PPAR_RXR.01 | 1132 | 1154 | 1 | 0.767 | gtctcccaggtgagAGGTc<br>aga  |                                                                             |
| 361 | Scp2      | V\$PPAR_RXR.01 | 1035 | 1057 | 1 | 0.767 | gagagctggctcagAGGTt<br>aaga |                                                                             |
| 362 | Acsm1     | V\$PPAR_RXR.01 | 4890 | 4912 | 1 | 0.768 | gacgttagtcaagAGGTca<br>gaa  |                                                                             |
| 363 | Chdh      | V\$PPAR_RXR.01 | 1054 | 1076 | 1 | 0.768 | ctgaggcagccaaaAGGT<br>aaca  |                                                                             |
| 364 | Glyat     | V\$PPAR_RXR.01 | 4191 | 4213 | 1 | 0.768 | acagaactggatggAGGTc<br>atct |                                                                             |
| 365 | Decr2     | V\$PPAR_RXR.01 | 2898 | 2920 | 1 | 0.769 | tctgtcagggaacaAGGTg<br>accg |                                                                             |
| 366 | Pitrm1    | V\$PPAR_RXR.01 | 1730 | 1752 | 1 | 0.769 | ggcagctaggaggaAGGT<br>ccca  |                                                                             |
| 367 | Bckdha    | V\$PPAR_RXR.01 | 3266 | 3288 | 1 | 0.77  | ggctaataagctagAGGTc<br>attg |                                                                             |
| 368 | Bdh1      | V\$PPAR_RXR.01 | 595  | 617  | 1 | 0.77  | agtgccggggttacAGGTgt<br>gtg |                                                                             |
| 369 | Bdh1      | V\$PPAR_RXR.01 | 93   | 115  | 1 | 0.77  | agtgccggggttacAGGTgt<br>gtg |                                                                             |
| 370 | Ech1      | V\$PPAR_RXR.01 | 3847 | 3869 | 1 | 0.77  | actgggaggtagaAGGT<br>gacag  |                                                                             |

|                   |                |      |      |   |       |                             |                                                                                              |
|-------------------|----------------|------|------|---|-------|-----------------------------|----------------------------------------------------------------------------------------------|
| 371 Fabp1         | V\$PPAR_RXR.02 | 4448 | 4470 | 1 | 0.77  | ggttttgagttcAAAGgtatttc     |                                                                                              |
| 372 Hacl1         | V\$PPAR_RXR.01 | 3196 | 3218 | 1 | 0.77  | gctctgtggagaacAGGTc<br>acta |                                                                                              |
| 372 2810422J05Rik | V\$PPAR_RXR.01 | 1738 | 1760 | 1 | 0.771 | cctagcatgtgcaaAGGTc<br>ccag |                                                                                              |
| 373 Uqcrc1        | V\$PPAR_RXR.01 | 2625 | 2647 | 1 | 0.771 | ggtaataggatcatAGGTa<br>agga |                                                                                              |
| 374 Acp5          | V\$PPAR_RXR.01 | 3520 | 3542 | 1 | 0.772 | accaggctggtggcAGGTc<br>agcg |                                                                                              |
| 375 Acp5          | V\$PPAR_RXR.01 | 4681 | 4703 | 1 | 0.772 | accaggctggtggcAGGTc<br>agcg |                                                                                              |
| 376 Cyp4a14       | V\$PPAR_RXR.02 | 3518 | 3540 | 1 | 0.772 | caaagtgggctaAAAGttca<br>gac |                                                                                              |
| 377 Slc25a1       | V\$PPAR_RXR.01 | 3731 | 3753 | 1 | 0.772 | gttgccaggctagAGGTg<br>cagc  |                                                                                              |
| 378 2810422J05Rik | V\$PPAR_RXR.02 | 4093 | 4115 | 1 | 0.773 | tgtgctgggatcAAAGgtatg<br>ta |                                                                                              |
| 379 Acad8         | V\$PPAR_RXR.01 | 456  | 478  | 1 | 0.773 | attctggggccagAGGTgtt<br>ct  |                                                                                              |
| 380 Cat           | V\$PPAR_RXR.01 | 166  | 188  | 1 | 0.773 | aggactggggttacAGGTgt<br>gtg | Girnun, G. D., et al.<br>(2002). <i>Molecular<br/>Endocrinology</i> <b>16</b> ,<br>2793-2802 |
| 381 D10Jhu81e     | V\$PPAR_RXR.01 | 518  | 540  | 1 | 0.773 | gccttcaaggctgaAGGTct<br>gcc |                                                                                              |
| 382 Vdac2         | V\$PPAR_RXR.01 | 3723 | 3745 | 1 | 0.773 | ctaaattctgtaaAGGTga<br>aga  |                                                                                              |
| 383 Acsm1         | V\$PPAR_RXR.01 | 5058 | 5080 | 1 | 0.774 | actgtgaaggacacAGGTa<br>gact |                                                                                              |
| 384 Actg1         | V\$PPAR_RXR.01 | 2597 | 2619 | 1 | 0.774 | ggtaccaagcacagAGGT<br>gaccg |                                                                                              |
| 385 Agxt          | V\$PPAR_RXR.01 | 4638 | 4660 | 1 | 0.774 | atgtgcaagggtgaAGGTta<br>ccc |                                                                                              |
| 386 Coq9          | V\$PPAR_RXR.01 | 3614 | 3636 | 1 | 0.774 | tgaagagtggaagcAGGTc<br>atgc |                                                                                              |
| 387 Ctsd          | V\$PPAR_RXR.02 | 3368 | 3390 | 1 | 0.774 | agctcaggatgAAAGctc<br>aggt  |                                                                                              |
| 388 Fabp1         | V\$PPAR_RXR.01 | 1162 | 1184 | 1 | 0.774 | catcagacaggcatAGGTc<br>acct |                                                                                              |
| 389 Glrx5         | V\$PPAR_RXR.02 | 2328 | 2350 | 1 | 0.774 | agcgctgggatcAAAGgtgt<br>gtg |                                                                                              |
| 390 Ndufs2        | V\$PPAR_RXR.02 | 2802 | 2824 | 1 | 0.774 | aaatgaggagtcAAAGatta<br>cta |                                                                                              |
| 391 Sdhb          | V\$PPAR_RXR.02 | 2970 | 2992 | 1 | 0.774 | gccatagggttAAAGgtctt<br>ca  |                                                                                              |
| 392 Adhfe1        | V\$PPAR_RXR.01 | 2109 | 2131 | 1 | 0.775 | atgctgtggggcagAGGTa<br>gtgc |                                                                                              |
| 393 Msra          | V\$PPAR_RXR.01 | 1924 | 1946 | 1 | 0.775 | cccagcactgccacAGGTc<br>aggg |                                                                                              |
| 394 Ndufs8        | V\$PPAR_RXR.01 | 1221 | 1243 | 1 | 0.775 | gatcctgggtcttAGGTcat<br>ca  |                                                                                              |
| 395 Acox1         | V\$PPAR_RXR.01 | 1998 | 2020 | 1 | 0.776 | agtccacaggcctgAGGTc<br>agtc | Varanasi, U. et al.<br>(1996). <i>J Biol Chem</i><br><b>271</b> , 2147-2158                  |

|     |           |                |      |      |   |       |                             |
|-----|-----------|----------------|------|------|---|-------|-----------------------------|
| 396 | Ndufs4    | V\$PPAR_RXR.01 | 229  | 251  | 1 | 0.776 | aaaagccctgccagAGGT<br>catga |
| 397 | Slc25a10  | V\$PPAR_RXR.01 | 3161 | 3183 | 1 | 0.776 | tgtaatgtgtaaacAGGTcag<br>ga |
| 398 | Tomm70a   | V\$PPAR_RXR.01 | 1355 | 1377 | 1 | 0.776 | tgtttgaagacatAGGTca<br>agt  |
| 399 | Acad8     | V\$PPAR_RXR.01 | 678  | 700  | 1 | 0.777 | tcacaatgggttccAGGTca<br>tcc |
| 400 | Ctsa      | V\$PPAR_RXR.01 | 669  | 691  | 1 | 0.777 | gggtccgggtgtaaAGGTg<br>actg |
| 401 | Ctsa      | V\$PPAR_RXR.01 | 641  | 663  | 1 | 0.777 | gggtccgggtgtaaAGGTg<br>actg |
| 402 | Hspa9     | V\$PPAR_RXR.01 | 4407 | 4429 | 1 | 0.777 | gcgatggagaacaaAGGT<br>ccccg |
| 403 | Pccb      | V\$PPAR_RXR.01 | 3617 | 3639 | 1 | 0.777 | gggtccttgctaagAGGTca<br>gca |
| 404 | Pcx       | V\$PPAR_RXR.01 | 680  | 702  | 1 | 0.777 | tacagatggttagAGGTca<br>tct  |
| 405 | Shmt2     | V\$PPAR_RXR.01 | 183  | 205  | 1 | 0.777 | gtgtgggtgggaaAGGTa<br>gagt  |
| 406 | Mosc2     | V\$PPAR_RXR.01 | 1441 | 1463 | 1 | 0.778 | tgctcaaggcagaAGGTa<br>agga  |
| 407 | Ndufa6    | V\$PPAR_RXR.01 | 3455 | 3477 | 1 | 0.778 | agaggctagaaaaAGGT<br>tactg  |
| 408 | Tomm70a   | V\$PPAR_RXR.01 | 2475 | 2497 | 1 | 0.778 | tagttgtgaggaaAGGTga<br>ggg  |
| 409 | Acad8     | V\$PPAR_RXR.01 | 1448 | 1470 | 1 | 0.779 | agtttcaggcaagAGGTgt<br>agg  |
| 410 | Ctsd      | V\$PPAR_RXR.01 | 3967 | 3989 | 1 | 0.78  | gagagccttggcagAGGTc<br>aagt |
| 411 | D10Jhu81e | V\$PPAR_RXR.01 | 2601 | 2623 | 1 | 0.78  | ggacagaaggcgttAGGTc<br>agca |
| 412 | Es31      | V\$PPAR_RXR.01 | 631  | 653  | 1 | 0.78  | tcaggaatgaaaaAGGTc<br>atct  |
| 413 | Es31      | V\$PPAR_RXR.01 | 631  | 653  | 1 | 0.78  | tcaggaatgaaaaAGGTc<br>atct  |
| 414 | Sdhd      | V\$PPAR_RXR.01 | 3762 | 3784 | 1 | 0.78  | ccctccttgccaaAGGTga<br>gcg  |
| 415 | Acot2     | V\$PPAR_RXR.01 | 4038 | 4060 | 1 | 0.781 | gagaattagctcagAGGTta<br>aaa |
| 416 | Decr2     | V\$PPAR_RXR.01 | 3170 | 3192 | 1 | 0.781 | tgacagaggttagAGGTca<br>tgg  |
| 417 | Hspe1     | V\$PPAR_RXR.01 | 807  | 829  | 1 | 0.781 | cagatagcttaaAGGTta<br>aga   |
| 418 | Acot2     | V\$PPAR_RXR.01 | 276  | 298  | 1 | 0.782 | ttgtgaaggaggtAGGTca<br>ctg  |
| 419 | Acox1     | V\$PPAR_RXR.01 | 4557 | 4579 | 1 | 0.782 | aagcgagaggaacAGGT<br>ccagt  |
| 420 | Slc25a10  | V\$PPAR_RXR.01 | 1026 | 1048 | 1 | 0.782 | ctgttccggggagAGGTcc<br>tgt  |
| 421 | Vdac2     | V\$PPAR_RXR.01 | 990  | 1012 | 1 | 0.782 | aatgccagggttatAGGTgt<br>gtt |
| 422 | Glyat     | V\$PPAR_RXR.02 | 3180 | 3202 | 1 | 0.783 | atgtagccagtcAAAGgac<br>aggg |

Varanasi, U. et al.  
(1996). *J Biol Chem*  
**271**, 2147-2159

|     |           |                |      |      |   |       |                              |
|-----|-----------|----------------|------|------|---|-------|------------------------------|
| 423 | Ephx2     | V\$PPAR_RXR.01 | 1434 | 1456 | 1 | 0.784 | gggtagcagacaaaAGGT<br>aagag  |
| 424 | Hspa9     | V\$PPAR_RXR.01 | 1359 | 1381 | 1 | 0.784 | attaacagtggaatAGGTca<br>gta  |
| 425 | Phyh      | V\$PPAR_RXR.01 | 3700 | 3722 | 1 | 0.784 | cccactgggaaatAGGTgt<br>ggt   |
| 426 | Slc25a10  | V\$PPAR_RXR.01 | 133  | 155  | 1 | 0.784 | agtgccttgaaaaAGGTca<br>taa   |
| 427 | Actg1     | V\$PPAR_RXR.01 | 436  | 458  | 1 | 0.785 | tctgactgggagccAGGTc<br>aggg  |
| 428 | Gldc      | V\$PPAR_RXR.01 | 4907 | 4929 | 1 | 0.785 | ttcccattggctaaAGGTtc<br>ct   |
| 429 | Aass      | V\$PPAR_RXR.01 | 2138 | 2160 | 1 | 0.786 | gtcacagggtgttAGGTca<br>gag   |
| 430 | Pcx       | V\$PPAR_RXR.01 | 716  | 738  | 1 | 0.787 | aggaagagggaaatAGGT<br>ttgt   |
| 431 | Vapa      | V\$PPAR_RXR.01 | 382  | 404  | 1 | 0.788 | gagaatctgtctaaAGGTga<br>ata  |
| 432 | Acox2     | V\$PPAR_RXR.01 | 5100 | 5122 | 1 | 0.79  | ctgtcccaggacagAGGTt<br>cttg  |
| 433 | Es31      | V\$PPAR_RXR.01 | 2529 | 2551 | 1 | 0.79  | ttggttgaggtaaAGGTatt<br>tc   |
| 434 | Es31      | V\$PPAR_RXR.01 | 2529 | 2551 | 1 | 0.79  | ttggttgaggtaaAGGTatt<br>tc   |
| 435 | Nipsnap3a | V\$PPAR_RXR.01 | 3123 | 3145 | 1 | 0.79  | ttgattttgtccaaAGGTtaga<br>c  |
| 436 | Peci      | V\$PPAR_RXR.01 | 4754 | 4776 | 1 | 0.79  | ccaactccgtacaaAGGTg<br>attg  |
| 437 | Peci      | V\$PPAR_RXR.01 | 4765 | 4787 | 1 | 0.79  | ccaactccgtacaaAGGTg<br>attg  |
| 438 | Scp2      | V\$PPAR_RXR.01 | 1148 | 1170 | 1 | 0.79  | agcccatagtccatAGGTc<br>attt  |
| 439 | Acaa1b    | V\$PPAR_RXR.01 | 3773 | 3795 | 1 | 0.791 | tatgttagggcagAGGTtg<br>ata   |
| 440 | Ctsh      | V\$PPAR_RXR.01 | 452  | 474  | 1 | 0.791 | tatttagaggacctAGGTca<br>gac  |
| 441 | Aass      | V\$PPAR_RXR.01 | 4859 | 4881 | 1 | 0.792 | tgctgccagggtactAGGTca<br>tgc |
| 442 | Fahd2a    | V\$PPAR_RXR.01 | 4192 | 4214 | 1 | 0.792 | aaggaaaggggaaaAGG<br>Ttcagt  |
| 443 | Gpt2      | V\$PPAR_RXR.01 | 332  | 354  | 1 | 0.792 | tctctgaagctcacAGGTca<br>ctt  |
| 444 | Ndufa8    | V\$PPAR_RXR.01 | 751  | 773  | 1 | 0.792 | tccttacaggagaaAGGTa<br>gaca  |
| 445 | Cox6b1    | V\$PPAR_RXR.01 | 378  | 400  | 1 | 0.793 | aggagctgaggcagAGGT<br>catgg  |
| 446 | Fahd2a    | V\$PPAR_RXR.01 | 1464 | 1486 | 1 | 0.793 | ggagcacagagcaaAGGT<br>gagat  |
| 447 | Ugt2b1    | V\$PPAR_RXR.02 | 3584 | 3606 | 1 | 0.793 | agctcccttgtcAAAGatcaa<br>gt  |
| 448 | Bdh1      | V\$PPAR_RXR.01 | 4750 | 4772 | 1 | 0.794 | tgaggggaggcaaaAGGT<br>gcgag  |
| 449 | Bdh1      | V\$PPAR_RXR.01 | 4248 | 4270 | 1 | 0.794 | tgaggggaggcaaaAGGT<br>gcgag  |

|               |                |      |      |   |       |                             |
|---------------|----------------|------|------|---|-------|-----------------------------|
| 450 Dhrs4     | V\$PPAR_RXR.01 | 2560 | 2582 | 1 | 0.794 | agtgctggggctaaAGGTgt<br>gcg |
| 451 Hspa5     | V\$PPAR_RXR.01 | 74   | 96   | 1 | 0.794 | agatcaggggtataAGGTc<br>atcc |
| 452 Hspa5     | V\$PPAR_RXR.01 | 71   | 93   | 1 | 0.794 | agatcaggggtataAGGTc<br>atcc |
| 453 Asah1     | V\$PPAR_RXR.01 | 1502 | 1524 | 1 | 0.796 | tagacttaggttacAGGTgt<br>gta |
| 454 Acaa1b    | V\$PPAR_RXR.01 | 1003 | 1025 | 1 | 0.797 | tcttactggggaacAGGTgc<br>gtg |
| 454 Pdia3     | V\$PPAR_RXR.02 | 3276 | 3298 | 1 | 0.799 | tgctatccgttcAAAGctcatt<br>g |
| 455 Chdh      | V\$PPAR_RXR.01 | 4803 | 4825 | 1 | 0.801 | ggagctggggccagAGGT<br>ccagg |
| 456 Ctsb      | V\$PPAR_RXR.01 | 134  | 156  | 1 | 0.801 | caaccctgtgaaaAGGTc<br>atcc  |
| 457 Got2      | V\$PPAR_RXR.01 | 3851 | 3873 | 1 | 0.801 | actctctgggagaaAGGTg<br>cct  |
| 458 Ctsa      | V\$PPAR_RXR.01 | 3293 | 3315 | 1 | 0.802 | gttataatggcaacAGGTct<br>gat |
| 459 Ctsa      | V\$PPAR_RXR.01 | 3265 | 3287 | 1 | 0.802 | gttataatggcaacAGGTct<br>gat |
| 460 Gldc      | V\$PPAR_RXR.01 | 3967 | 3989 | 1 | 0.802 | aaggatgtgtataaAGGTc<br>agat |
| 461 Hspd1     | V\$PPAR_RXR.01 | 3415 | 3437 | 1 | 0.802 | tgaagaaaggcaaaAGGT<br>atttg |
| 462 Ephx2     | V\$PPAR_RXR.01 | 2976 | 2998 | 1 | 0.803 | gctgactggggcagAGGTa<br>gcag |
| 463 Bckdha    | V\$PPAR_RXR.01 | 592  | 614  | 1 | 0.805 | tccagccaggacagAGGT<br>atcac |
| 464 Hrsp12    | V\$PPAR_RXR.02 | 3084 | 3106 | 1 | 0.805 | tgctttatagtcAAAGttcatgt     |
| 465 Decr2     | V\$PPAR_RXR.02 | 3361 | 3383 | 1 | 0.806 | tggggcattgtcAAAGgtga<br>ctt |
| 466 Got2      | V\$PPAR_RXR.01 | 2197 | 2219 | 1 | 0.807 | tttccccggggataAGGTca<br>tat |
| 467 Hspa9     | V\$PPAR_RXR.01 | 4621 | 4643 | 1 | 0.807 | tccgctccggacagAGGTc<br>gtga |
| 468 Ctsb      | V\$PPAR_RXR.01 | 3039 | 3061 | 1 | 0.809 | agatggaagcagaaAGGT<br>caaag |
| 469 D10Jhu81e | V\$PPAR_RXR.01 | 4857 | 4879 | 1 | 0.809 | tcctccagggaAAAAGGTg<br>ctgg |
| 470 Tomm70a   | V\$PPAR_RXR.01 | 715  | 737  | 1 | 0.809 | agcagccagagtaaAGGT<br>gaagg |
| 471 Bckdha    | V\$PPAR_RXR.01 | 1498 | 1520 | 1 | 0.81  | tataagtcggtcagAGGTg<br>ggg  |
| 472 Aldh3a2   | V\$PPAR_RXR.02 | 386  | 408  | 1 | 0.812 | ggaaagatgttcAAAGgtta<br>gga |
| 473 Fh1       | V\$PPAR_RXR.01 | 3719 | 3741 | 1 | 0.812 | gagtagttggtgaaAGGTa<br>gaac |
| 474 Ndufb8    | V\$PPAR_RXR.01 | 2336 | 2358 | 1 | 0.812 | tggcaaaaggcacaAGGT<br>cacat |
| 475 Phyh      | V\$PPAR_RXR.01 | 1280 | 1302 | 1 | 0.812 | gaaggagaggaatAGGT<br>aacta  |

|                   |                |      |      |   |       |                             |
|-------------------|----------------|------|------|---|-------|-----------------------------|
| 476 Ctsz          | V\$PPAR_RXR.01 | 1653 | 1675 | 1 | 0.813 | gggcacatgggtaaAGGTt<br>gcta |
| 477 Opa1          | V\$PPAR_RXR.01 | 1032 | 1054 | 1 | 0.813 | acaaataggctcagAGGTc<br>aacc |
| 478 Ech1          | V\$PPAR_RXR.01 | 4361 | 4383 | 1 | 0.815 | tctcaggaggcaaaAGGTg<br>gagg |
| 479 Ndufa8        | V\$PPAR_RXR.01 | 268  | 290  | 1 | 0.816 | atgtgactggcccaAGGTc<br>acac |
| 480 Hibch         | V\$PPAR_RXR.01 | 4773 | 4795 | 1 | 0.817 | gccaggccgggtaaAGGT<br>ggggc |
| 481 Lamp2         | V\$PPAR_RXR.01 | 493  | 515  | 1 | 0.817 | agtataggggtaaAGGTgt<br>gca  |
| 482 Phyh          | V\$PPAR_RXR.01 | 1886 | 1908 | 1 | 0.817 | ggatgaggggtgagAGGT<br>gacag |
| 483 Acaa1b        | V\$PPAR_RXR.01 | 18   | 40   | 1 | 0.818 | cgagttgaggcagAGGTc<br>caca  |
| 484 Ehhadh        | V\$PPAR_RXR.02 | 2161 | 2183 | 1 | 0.818 | gttcagtaggtcAAAGgaga<br>gaa |
| 485 Mpst          | V\$PPAR_RXR.01 | 824  | 846  | 1 | 0.818 | aataacaaggtcacAGGTa<br>ccca |
| 486 Pcx           | V\$PPAR_RXR.01 | 3364 | 3386 | 1 | 0.818 | gtgtataagggcagAGGTg<br>tgtc |
| 487 Acaa1b        | V\$PPAR_RXR.02 | 4345 | 4367 | 1 | 0.819 | cagaagcagttcAAAGgtct<br>ctg |
| 488 D10Jhu81e     | V\$PPAR_RXR.02 | 4292 | 4314 | 1 | 0.819 | gtgaaggctgtcAAAGgtga<br>cct |
| 489 Ehhadh        | V\$PPAR_RXR.02 | 4069 | 4091 | 1 | 0.819 | ggaacaaagttcAAAGggc<br>agtt |
| 490 Hsd17b4       | V\$PPAR_RXR.01 | 3612 | 3634 | 1 | 0.819 | ggactcaaggtgaaAGGTg<br>ggca |
| 491 Slc25a10      | V\$PPAR_RXR.01 | 4616 | 4638 | 1 | 0.819 | gggataggggacagAGGT<br>ccact |
| 492 Uqcrb         | V\$PPAR_RXR.01 | 4698 | 4720 | 1 | 0.819 | ggagtcttgagacAGGTa<br>atgt  |
| 493 Uqcrc1        | V\$PPAR_RXR.02 | 2415 | 2437 | 1 | 0.821 | ccacatgtgtcAAAGttcaa<br>ag  |
| 494 Gcdh          | V\$PPAR_RXR.02 | 3480 | 3502 | 1 | 0.824 | gttaggaggacAAAGgac<br>aact  |
| 495 Gcdh          | V\$PPAR_RXR.02 | 3480 | 3502 | 1 | 0.824 | gttaggaggacAAAGgac<br>aact  |
| 496 Sdhb          | V\$PPAR_RXR.01 | 4131 | 4153 | 1 | 0.824 | aaatctgaggacacAGGTc<br>ggtt |
| 497 Ndufb8        | V\$PPAR_RXR.01 | 2055 | 2077 | 1 | 0.825 | ggtagggtgggaatAGGTt<br>aatc |
| 498 Timm13        | V\$PPAR_RXR.01 | 1697 | 1719 | 1 | 0.825 | ttcctggtggccagAGGTta<br>aaa |
| 499 2010309E21Rik | V\$PPAR_RXR.01 | 178  | 200  | 1 | 0.826 | tcccacggggccaaAGGT<br>agcag |
| 500 Bdh1          | V\$PPAR_RXR.01 | 5079 | 5101 | 1 | 0.826 | agggaactggcccaAGGT<br>cactt |
| 501 Ctsa          | V\$PPAR_RXR.01 | 3964 | 3986 | 1 | 0.826 | ctgaatgtggtaaAGGTgg<br>cgg  |
| 502 Ctsa          | V\$PPAR_RXR.01 | 3936 | 3958 | 1 | 0.826 | ctgaatgtggtaaAGGTgg<br>cgg  |



|     |          |                |      |      |   |       |                              |                                                                                              |
|-----|----------|----------------|------|------|---|-------|------------------------------|----------------------------------------------------------------------------------------------|
| 503 | Timm13   | V\$PPAR_RXR.01 | 3734 | 3756 | 1 | 0.826 | ggtggggaggtgacAGGT<br>gaaac  |                                                                                              |
| 504 | Fahd2a   | V\$PPAR_RXR.02 | 4770 | 4792 | 1 | 0.827 | aattagaagctcAAAGgtcg<br>gat  |                                                                                              |
| 505 | Hspe1    | V\$PPAR_RXR.01 | 3420 | 3442 | 1 | 0.827 | tacaatggggccaaAGGTa<br>ccag  |                                                                                              |
| 506 | Ndufa4   | V\$PPAR_RXR.01 | 1877 | 1899 | 1 | 0.827 | gcatcactggtcaaAGGTgt<br>aat  |                                                                                              |
| 507 | Cyp1a2   | V\$PPAR_RXR.02 | 2422 | 2444 | 1 | 0.829 | cacatggagatcAAAGgac<br>aact  |                                                                                              |
| 508 | Abcd3    | V\$PPAR_RXR.01 | 796  | 818  | 1 | 0.83  | aatatctaggcaaaAGGTa<br>gtga  |                                                                                              |
| 509 | Gstk1    | V\$PPAR_RXR.01 | 847  | 869  | 1 | 0.83  | gagttaaaggccagAGGTc<br>gtca  |                                                                                              |
| 510 | Actg1    | V\$PPAR_RXR.01 | 1078 | 1100 | 1 | 0.832 | gagtgtgggataaAGGTg<br>tgtg   |                                                                                              |
| 511 | Cox4i1   | V\$PPAR_RXR.01 | 595  | 617  | 1 | 0.833 | cctgtggaggccaaAGGTg<br>tcag  |                                                                                              |
| 512 | Cat      | V\$PPAR_RXR.02 | 4260 | 4282 | 1 | 0.835 | ggatcagaagtcAAAGatc<br>attt  | Girnun, G. D., et al.<br>(2002). <i>Molecular<br/>Endocrinology</i> <b>16</b> ,<br>2793-2803 |
| 513 | Cyp2a22  | V\$PPAR_RXR.01 | 1632 | 1654 | 1 | 0.835 | agcagcaagggataAGGT<br>caagt  |                                                                                              |
| 514 | Hsd17b10 | V\$PPAR_RXR.01 | 2317 | 2339 | 1 | 0.836 | atgttctgggtaaAGGTgg<br>tgc   |                                                                                              |
| 515 | Prdx3    | V\$PPAR_RXR.02 | 4755 | 4777 | 1 | 0.836 | attcaggaggtcAAAGgga<br>aatt  |                                                                                              |
| 516 | Atp5j2   | V\$PPAR_RXR.02 | 2973 | 2995 | 1 | 0.838 | agtgtggggtcAAAGgcct<br>gtg   |                                                                                              |
| 517 | Hspa5    | V\$PPAR_RXR.01 | 4275 | 4297 | 1 | 0.838 | cggagaaaggaatAGGT<br>tacao   |                                                                                              |
| 518 | Hspa5    | V\$PPAR_RXR.01 | 4272 | 4294 | 1 | 0.838 | cggagaaaggaatAGGT<br>tacao   |                                                                                              |
| 519 | Actg1    | V\$PPAR_RXR.02 | 1810 | 1832 | 1 | 0.84  | tctgtgagttcAAAGctcacc<br>t   |                                                                                              |
| 520 | Cycs     | V\$PPAR_RXR.01 | 4496 | 4518 | 1 | 0.84  | gtttaacagagtaaAGGTca<br>cca  |                                                                                              |
| 521 | Hrsp12   | V\$PPAR_RXR.01 | 2970 | 2992 | 1 | 0.842 | tgacagaggtcacAGGTc<br>tgac   |                                                                                              |
| 522 | Scp2     | V\$PPAR_RXR.01 | 312  | 334  | 1 | 0.843 | ggctcagtgataaAGGTa<br>aatg   |                                                                                              |
| 523 | Hacl1    | V\$PPAR_RXR.02 | 958  | 980  | 1 | 0.845 | aagaaggagctcAAAGggt<br>atga  |                                                                                              |
| 524 | Slc25a15 | V\$PPAR_RXR.01 | 2065 | 2087 | 1 | 0.845 | acaaatttggtacAGGTaa<br>cgt   |                                                                                              |
| 525 | Acox2    | V\$PPAR_RXR.01 | 4481 | 4503 | 1 | 0.846 | ttgaactaggtctcAGGTca<br>caa  |                                                                                              |
| 526 | Ech1     | V\$PPAR_RXR.01 | 4787 | 4809 | 1 | 0.849 | tcccactggggccaaAGGTtt<br>aag |                                                                                              |
| 527 | Acox1    | V\$PPAR_RXR.01 | 1084 | 1106 | 1 | 0.853 | agaaactgggtgaaAGGT<br>ggatt  | Varanasi, U. et al.<br>(1996). <i>J Biol Chem</i><br><b>271</b> , 2147-2160                  |
| 528 | Ndufa7   | V\$PPAR_RXR.01 | 375  | 397  | 1 | 0.854 | ctgctactggatacAGGTca<br>gag  |                                                                                              |

|              |                |      |      |   |       |                             |
|--------------|----------------|------|------|---|-------|-----------------------------|
| 529 Nipsnap1 | V\$PPAR_RXR.01 | 4783 | 4805 | 1 | 0.854 | gtacagaggggaaaAGGT<br>cgttg |
| 530 Adhfe1   | V\$PPAR_RXR.01 | 4711 | 4733 | 1 | 0.855 | gggaattgggctagAGGTt<br>actt |
| 531 Hspa9    | V\$PPAR_RXR.02 | 3716 | 3738 | 1 | 0.855 | aatgatggggtcAAAGatga<br>ccg |
| 532 Agxt     | V\$PPAR_RXR.01 | 3222 | 3244 | 1 | 0.857 | tgaaagttgggcaaAGGTt<br>ggg  |
| 533 Scp2     | V\$PPAR_RXR.01 | 47   | 69   | 1 | 0.857 | aactatgggggaaAGGTc<br>tcct  |
| 534 Ndufa4   | V\$PPAR_RXR.01 | 2198 | 2220 | 1 | 0.858 | accctgagggagagAGGT<br>catct |
| 535 Hspd1    | V\$PPAR_RXR.01 | 2568 | 2590 | 1 | 0.86  | tattaaacggagaaAGGTa<br>atgc |
| 535 Ctsd     | V\$PPAR_RXR.01 | 4757 | 4779 | 1 | 0.861 | gaatgactggatacAGGTc<br>acgt |
| 536 Cyp2e1   | V\$PPAR_RXR.01 | 3520 | 3542 | 1 | 0.861 | caataggaggaaaaAGGT<br>cccga |
| 537 Bdh1     | V\$PPAR_RXR.01 | 2435 | 2457 | 1 | 0.862 | ggaggacaggccaaAGGT<br>cgggg |
| 538 Chdh     | V\$PPAR_RXR.01 | 4651 | 4673 | 1 | 0.863 | tttcaggggaaaAGGTg<br>aaga   |
| 539 Ndufs8   | V\$PPAR_RXR.01 | 4313 | 4335 | 1 | 0.863 | ttgtagctgggaaAGGTctt<br>gg  |
| 540 Chdh     | V\$PPAR_RXR.01 | 4026 | 4048 | 1 | 0.865 | agtacggtggaacAGGTc<br>actg  |
| 541 Cysc     | V\$PPAR_RXR.01 | 4570 | 4592 | 1 | 0.866 | ccaagcctgggtaaAGGTc<br>gcca |
| 542 Hspa5    | V\$PPAR_RXR.01 | 4704 | 4726 | 1 | 0.868 | ggtctcggggtgagAGGTc<br>acc  |
| 543 Hspa5    | V\$PPAR_RXR.01 | 4701 | 4723 | 1 | 0.868 | ggtctcggggtgagAGGTc<br>acc  |
| 544 Vdac2    | V\$PPAR_RXR.01 | 4129 | 4151 | 1 | 0.87  | cagagtgaggcaaaAGGTt<br>aata |
| 545 Mut      | V\$PPAR_RXR.01 | 2998 | 3020 | 1 | 0.874 | tcagaaatggtaaaAGGTg<br>agca |
| 546 Aass     | V\$PPAR_RXR.01 | 826  | 848  | 1 | 0.875 | gtgtaccaggatacAGGTg<br>aatc |
| 547 Gstk1    | V\$PPAR_RXR.01 | 1497 | 1519 | 1 | 0.875 | gtgtaccaggatacAGGTg<br>aatc |
| 548 Kmo      | V\$PPAR_RXR.02 | 4902 | 4924 | 1 | 0.877 | caagtttggtcAAAGctca<br>ctt  |
| 549 Vdac2    | V\$PPAR_RXR.01 | 5103 | 5125 | 1 | 0.878 | aagtcgcggggaaaAGGT<br>gatct |
| 550 Ndufs2   | V\$PPAR_RXR.01 | 379  | 401  | 1 | 0.879 | ggagagagggggagAGG<br>Tcattc |
| 551 Acp5     | V\$PPAR_RXR.01 | 8    | 30   | 1 | 0.888 | ggccctgaggtcagAGGTc<br>agca |
| 552 Acp5     | V\$PPAR_RXR.01 | 1169 | 1191 | 1 | 0.888 | ggccctgaggtcagAGGTc<br>agca |
| 553 Pcx      | V\$PPAR_RXR.01 | 1758 | 1780 | 1 | 0.888 | atgaggcagggcaaAGGT<br>cctaa |
| 554 Grpel1   | V\$PPAR_RXR.01 | 4770 | 4792 | 1 | 0.89  | ggtgaggaggtgaaAGGT<br>gaggt |

|             |                |      |      |   |       |                             |                                                                             |
|-------------|----------------|------|------|---|-------|-----------------------------|-----------------------------------------------------------------------------|
| 555 Aldh7a1 | V\$PPAR_RXR.01 | 2030 | 2052 | 1 | 0.895 | ccttcagaggtcagAGGTc<br>agat |                                                                             |
| 556 Acaa1b  | V\$PPAR_RXR.01 | 3971 | 3993 | 1 | 0.898 | aagtgggaggccagAGGT<br>cagat |                                                                             |
| 557 Coq9    | V\$PPAR_RXR.01 | 575  | 597  | 1 | 0.902 | gggtgactggtgaaAGGTc<br>atgg |                                                                             |
| 558 Chdh    | V\$PPAR_RXR.01 | 4300 | 4322 | 1 | 0.907 | atgcatgaggtcagAGGTc<br>aata |                                                                             |
| 559 Msra    | V\$PPAR_RXR.02 | 2613 | 2635 | 1 | 0.907 | cacatggaggtcAAAGggc<br>aact |                                                                             |
| 560 Acox1   | V\$PPAR_RXR.01 | 4700 | 4722 | 1 | 0.909 | gggtaacaggacaaAGGTt<br>acgt | Varanasi, U. et al.<br>(1996). <i>J Biol Chem</i><br><b>271</b> , 2147-2161 |
| 561 Hspd1   | V\$PPAR_RXR.01 | 4737 | 4759 | 1 | 0.912 | gtcccgtgggtgaaAGGTc<br>aagt |                                                                             |
| 562 Hspe1   | V\$PPAR_RXR.01 | 4748 | 4770 | 1 | 0.912 | gtcccgtgggtgaaAGGTc<br>aagt |                                                                             |
| 563 Uox     | V\$PPAR_RXR.01 | 2831 | 2853 | 1 | 0.912 | acaatggggggcatAGGTc<br>atga |                                                                             |
| 564 Tomm70a | V\$PPAR_RXR.01 | 4930 | 4952 | 1 | 0.914 | cagaaaaggccagAGGT<br>caccg  |                                                                             |
| 565 Mccc2   | V\$PPAR_RXR.02 | 3452 | 3474 | 1 | 0.916 | gtaggagggtcAAAGgta<br>aaca  |                                                                             |
| 566 Bdh1    | V\$PPAR_RXR.01 | 1146 | 1168 | 1 | 0.922 | cacttgtaggtcagAGGTca<br>act |                                                                             |
| 567 Bdh1    | V\$PPAR_RXR.01 | 644  | 666  | 1 | 0.922 | cacttgtaggtcagAGGTca<br>act |                                                                             |
| 568 Glcd    | V\$PPAR_RXR.01 | 89   | 111  | 1 | 0.923 | ggaaaccaggtagAGGT<br>catag  |                                                                             |
| 569 Acox1   | V\$PPAR_RXR.02 | 658  | 680  | 1 | 0.924 | aaatctgggtcAAAGgtcc<br>aca  | Varanasi, U. et al.<br>(1996). <i>J Biol Chem</i><br><b>271</b> , 2147-2162 |
| 570 Phyh    | V\$PPAR_RXR.02 | 2324 | 2346 | 1 | 0.929 | agtgctgggtcAAAGgtga<br>aga  |                                                                             |
| 571 Hacl1   | V\$PPAR_RXR.01 | 614  | 636  | 1 | 0.944 | acaaaacaggggaaAGGT<br>cagag |                                                                             |
| 572 Acox1   | V\$PPAR_RXR.01 | 5049 | 5071 | 1 | 0.946 | gaaagcaaggtaaaAGGT<br>caagg | Varanasi, U. et al.<br>(1996). <i>J Biol Chem</i><br><b>271</b> , 2147-2163 |
| 573 Fh1     | V\$PPAR_RXR.01 | 1202 | 1224 | 1 | 0.985 | ttaaagtaggacaaAGGTc<br>acat |                                                                             |
| 574 Kmo     | V\$PPAR_RXR.01 | 2173 | 2195 | 1 | 0.985 | ttaaagtaggacaaAGGTc<br>acat |                                                                             |
